# Supplementary material for: Predicting unknown viral hosts with Dynamic Positive-Unlabeled learning
Source: Research Square preprint supplement (doi:10.21203/rs.3.rs-7187859/v1), 2025-08-05
Supplement: Supplementary file 1 [file 1eb53a5c64d7a865fd41e608.xlsx]

## Sheet: Sheet1
viral_family	iucn2020_binomial	order	family	VIRION_label	label	mean_pred	std_pred	median_prob	std_prob	10quant_prob	90quant_prob	mean_likelihood	median_likelihood	std_likelihood	10quant_likelihood	90quant_likelihood	mean_prop	median_prop	std_prop	10quant_prop	90quant_prop
adenoviridae	Abditomys latidens	Rodentia	Muridae	FALSE	0	0.00225679	0.05469	1.08608e-35	0.0189554	0	2.31889e-09	0.00228116	1.10218e-35	0.0191577	0	2.33278e-09	0.0133614	0.0124913	0.0056843	0.0072576	0.0206995
adenoviridae	Abeomelomys sevia	Rodentia	Muridae	FALSE	0	7.59769e-05	0.0099995	0	0.000653578	0	1.97894e-28	7.72146e-05	0	0.000664225	0	1.99297e-28	0.0134765	0.0125847	0.00572734	0.00731484	0.0208957
adenoviridae	Abrawayaomys ruschii	Rodentia	Cricetidae	FALSE	0	0.388373	0.488851	0.345632	0.384776	9.06595e-13	0.877175	0.388667	0.346602	0.385007	9.15847e-13	0.877356	0.00388024	0.00275735	0.00377267	0.000568454	0.00848208
adenoviridae	Abrocoma bennettii	Rodentia	Abrocomidae	FALSE	0	1.29236e-11	0	0	1.09634e-10	0	3.30591e-37	1.29714e-11	0	1.10042e-10	0	3.31843e-37	0.0112198	0.00808192	0.0108878	0.00162567	0.0250618
adenoviridae	Abrocoma boliviensis	Rodentia	Abrocomidae	FALSE	0	4.54675e-08	0	0	3.91015e-07	0	2.28162e-27	4.57838e-08	0	3.93735e-07	0	2.30232e-27	0.00803952	0.00564336	0.00802236	0.00115893	0.0176557
adenoviridae	Abrocoma budini	Rodentia	Abrocomidae	FALSE	0	1.1334e-17	0	0	9.7497e-17	0	8.5184e-36	1.14639e-17	0	9.86141e-17	0	8.87476e-36	0.00804064	0.00564389	0.00802332	0.00115901	0.0176581
adenoviridae	Abrocoma cinerea	Rodentia	Abrocomidae	FALSE	0	3.49924e-19	0	0	3.01007e-18	0	0	3.54092e-19	0	3.04593e-18	0	0	0.0104185	0.0074693	0.0101432	0.00149177	0.0229607
adenoviridae	Abrocoma famatina	Rodentia	Abrocomidae	FALSE	0	1.33388e-15	0	0	1.14745e-14	0	0	1.34917e-15	0	1.1606e-14	0	0	0.0080486	0.00564764	0.00803009	0.00115957	0.0176757
adenoviridae	Abrocoma shistacea	Rodentia	Abrocomidae	FALSE	0	3.03099e-22	0	0	2.60751e-21	0	0	3.06572e-22	0	2.63717e-21	0	0	0.00805203	0.00564925	0.00803302	0.00115982	0.0176833
adenoviridae	Abrocoma uspallata	Rodentia	Abrocomidae	FALSE	0	2.59035e-36	0	0	0	0	0	2.61833e-36	0	0	0	0	0.0080386	0.00564293	0.00802158	0.00115887	0.0176536
adenoviridae	Abrocoma vaccarum	Rodentia	Abrocomidae	FALSE	0	7.00424e-17	0	0	6.02528e-16	0	0	7.0845e-17	0	6.09432e-16	0	0	0.00803866	0.00564296	0.00802163	0.00115887	0.0176538
adenoviridae	Abrothrix andinus	Rodentia	Cricetidae	FALSE	0	0.00444886	0.0726079	1.0482e-18	0.0380373	1.01822e-33	1.19658e-06	0.00446207	1.05567e-18	0.0381509	1.03768e-33	1.20239e-06	0.00472877	0.00327354	0.00456042	0.000685176	0.0101186
adenoviridae	Abrothrix illutea	Rodentia	Cricetidae	FALSE	0	0.0177154	0.130756	4.09171e-16	0.110457	8.06008e-30	3.57065e-05	0.0177236	4.10385e-16	0.11051	8.11235e-30	3.58041e-05	0.00377133	0.00268927	0.00367618	0.000551623	0.00828965
adenoviridae	Abrothrix jelskii	Rodentia	Cricetidae	FALSE	0	0.0100831	0.0933946	1.21852e-19	0.0606484	3.59624e-34	4.25263e-07	0.0100961	1.22259e-19	0.0607019	3.61266e-34	4.26739e-07	0.00468465	0.00324484	0.00451821	0.00068109	0.0100334
adenoviridae	Abrothrix lanosus	Rodentia	Cricetidae	FALSE	0	0.0812636	0.270518	6.32439e-15	0.221988	0	0.558375	0.0813315	6.38731e-15	0.222167	0	0.558812	0.00365489	0.00260083	0.0035745	0.000535881	0.00806908
adenoviridae	Abrothrix longipilis	Rodentia	Cricetidae	FALSE	0	0.245655	0.432724	8.93946e-07	0.383056	6.18083e-17	0.938305	0.246407	9.12114e-07	0.383698	6.2683e-17	0.938965	0.0208052	0.0161533	0.0156703	0.00737102	0.0391297
adenoviridae	Abrothrix olivaceus	Rodentia	Cricetidae	FALSE	0	0.29876	0.45658	7.68434e-05	0.40337	4.98904e-14	0.932747	0.300698	7.865e-05	0.404875	5.18373e-14	0.934614	0.0488148	0.0378454	0.0362718	0.0174511	0.095229
adenoviridae	Abrothrix sanborni	Rodentia	Cricetidae	FALSE	0	0.237928	0.427205	2.1322e-05	0.362998	1.08225e-15	0.922312	0.23845	2.14698e-05	0.363462	1.09777e-15	0.922933	0.0141222	0.0110469	0.0116045	0.00467284	0.0261776
adenoviridae	Acerodon celebensis	Chiroptera	Pteropodidae	FALSE	0	0.887879	0.313139	0.956772	0.203248	0.786427	0.999719	0.918484	0.976953	0.19089	0.866675	0.999835	0.442349	0.440789	0.0976292	0.320269	0.571912
adenoviridae	Acerodon humilis	Chiroptera	Pteropodidae	FALSE	0	0.0384341	0.193595	1.27427e-27	0.162793	0	1.07725e-06	0.0384799	1.28389e-27	0.162974	0	1.07844e-06	0.00279797	0.00198688	0.00271424	0.000382844	0.0063097
adenoviridae	Acerodon jubatus	Chiroptera	Pteropodidae	FALSE	0	0.74778	0.433646	0.917896	0.349361	1.68314e-05	0.994346	0.748003	0.918106	0.349374	1.68847e-05	0.994383	0.00346059	0.0025063	0.00334454	0.000500249	0.00779711
adenoviridae	Acerodon leucotis	Chiroptera	Pteropodidae	FALSE	0	0.541714	0.497043	0.787334	0.424198	5.62904e-09	0.980701	0.541882	0.788329	0.424293	5.64359e-09	0.980811	0.00285612	0.00202245	0.00276776	0.000390288	0.00645006
adenoviridae	Acerodon mackloti	Chiroptera	Pteropodidae	FALSE	0	0.260443	0.439071	0.000143476	0.376959	3.10758e-18	0.896991	0.260606	0.000143742	0.377095	3.1405e-18	0.897407	0.00338613	0.00244539	0.00327184	0.000487126	0.00758357
adenoviridae	Acinonyx jubatus	Carnivora	Felidae	FALSE	0	0.894793	0.30435	0.990455	0.211029	0.559836	0.999997	0.980307	0.997125	0.0366279	0.935342	0.999999	0.576811	0.653609	0.331482	0.131628	0.966104
adenoviridae	Acomys airensis	Rodentia	Muridae	FALSE	0	0.44208	0.496566	0.511809	0.429184	2.06144e-14	0.95271	0.442905	0.516458	0.429768	2.09131e-14	0.953613	0.0162521	0.0150502	0.00691114	0.00857748	0.0252263
adenoviridae	Acomys cahirinus	Rodentia	Muridae	FALSE	0	0.913631	0.272835	0.939863	0.111765	0.835991	0.990661	0.918165	0.94202	0.108937	0.844445	0.991221	0.0609603	0.0529205	0.0302017	0.0325346	0.0987536
adenoviridae	Acomys cilicicus	Rodentia	Muridae	FALSE	0	0.671199	0.470104	0.778568	0.29258	0.00267805	0.912738	0.672733	0.781563	0.292846	0.00273126	0.913232	0.0133472	0.0124836	0.00567905	0.00724833	0.0206816
adenoviridae	Acomys cineraceus	Rodentia	Muridae	FALSE	0	0.432409	0.49577	0.37301	0.42724	7.72008e-18	0.937824	0.433446	0.376237	0.428004	7.80639e-18	0.939058	0.0207486	0.0191333	0.00918734	0.0106746	0.0327547
adenoviridae	Acomys dimidiatus	Rodentia	Muridae	FALSE	0	0.81043	0.386994	0.890624	0.258959	0.684605	0.967016	0.816067	0.898524	0.258939	0.693965	0.968297	0.0611513	0.0531305	0.0302757	0.0326818	0.0990728
adenoviridae	Acomys ignitus	Rodentia	Muridae	FALSE	0	0.461628	0.497652	0.707805	0.428602	1.81894e-19	0.947609	0.462474	0.712892	0.429218	1.86607e-19	0.948238	0.0160433	0.0148447	0.0068141	0.00847588	0.0248943
adenoviridae	Acomys johannis	Rodentia	Muridae	FALSE	0	0.452524	0.497484	0.668918	0.420985	1.14004e-16	0.923337	0.453429	0.671667	0.421662	1.15469e-16	0.924244	0.0160506	0.0148486	0.00681751	0.00847929	0.0249022
adenoviridae	Acomys kempi	Rodentia	Muridae	FALSE	0	0.407205	0.491668	0.143911	0.415061	5.06208e-21	0.919809	0.40857	0.146311	0.416218	5.21033e-21	0.921064	0.0236668	0.0215986	0.0107765	0.0118647	0.0377235
adenoviridae	Acomys louisae	Rodentia	Muridae	FALSE	0	0.101858	0.292938	6.39317e-11	0.25401	0	0.639883	0.102246	6.50736e-11	0.254815	0	0.644197	0.0194039	0.0179348	0.00847771	0.0101127	0.0304405
adenoviridae	Acomys minous	Rodentia	Muridae	FALSE	0	0.631581	0.483497	0.763866	0.322234	6.06579e-05	0.910001	0.632981	0.765403	0.322607	6.19166e-05	0.911133	0.0134308	0.012541	0.0057102	0.00729215	0.0207808
adenoviridae	Acomys mullah	Rodentia	Muridae	FALSE	0	0.330152	0.471463	0.0185708	0.379676	5.12257e-19	0.857312	0.331154	0.0189501	0.380613	5.20898e-19	0.858817	0.016512	0.0153378	0.00703336	0.00870723	0.0256585
adenoviridae	Acomys muzei	Rodentia	Muridae	FALSE	0	0.373483	0.484149	0.00235309	0.436368	1.24814e-18	0.960861	0.374073	0.00239029	0.436905	1.26251e-18	0.961305	0.0167743	0.0155429	0.00715824	0.00883289	0.0260714
adenoviridae	Acomys nesiotes	Rodentia	Muridae	FALSE	0	0.708416	0.455138	0.825256	0.303654	0.0296914	0.942006	0.709701	0.827296	0.30388	0.0299351	0.942642	0.013454	0.0125632	0.00571891	0.00730348	0.0208354
adenoviridae	Acomys ngurui	Rodentia	Muridae	FALSE	0	0.325419	0.466011	8.51196e-05	0.418574	6.41474e-24	0.950509	0.325983	8.74876e-05	0.41909	6.51567e-24	0.951318	0.0172581	0.0160094	0.00739231	0.00907316	0.02671
adenoviridae	Acomys percivali	Rodentia	Muridae	FALSE	0	0.359068	0.478815	0.000902682	0.426856	1.40693e-23	0.966246	0.359676	0.000915615	0.427323	1.42722e-23	0.966945	0.0161784	0.0149716	0.00687677	0.00853998	0.0251024
adenoviridae	Acomys russatus	Rodentia	Muridae	FALSE	0	0.358969	0.477779	0.00579432	0.405539	1.94166e-18	0.933388	0.359754	0.00587846	0.406184	1.98137e-18	0.934196	0.0168367	0.015619	0.00718818	0.00886199	0.0261752
adenoviridae	Acomys selousi	Rodentia	Muridae	FALSE	0	0.337198	0.474579	0.000262944	0.411972	7.95944e-24	0.934058	0.337915	0.000266097	0.412578	8.0399e-24	0.93471	0.0172536	0.0160071	0.00739011	0.00907079	0.0267012
adenoviridae	Acomys seurati	Rodentia	Muridae	FALSE	0	0.373734	0.484303	0.00958191	0.429824	5.2579e-23	0.948746	0.374315	0.00967346	0.430256	5.31569e-23	0.949422	0.014938	0.0138647	0.0063197	0.00805104	0.0232038
adenoviridae	Acomys spinosissimus	Rodentia	Muridae	FALSE	0	0.344788	0.478209	0.00024482	0.40503	5.57403e-24	0.944355	0.345542	0.000248111	0.405678	5.61514e-24	0.945149	0.0147999	0.0137494	0.00626043	0.00797576	0.0229204
adenoviridae	Acomys subspinosus	Rodentia	Muridae	FALSE	0	0.467578	0.499344	0.652711	0.403852	2.32678e-08	0.918032	0.469874	0.662288	0.405049	2.3711e-08	0.919643	0.0314279	0.0280717	0.0136085	0.0181004	0.0488835
adenoviridae	Acomys wilsoni	Rodentia	Muridae	FALSE	0	0.411865	0.493147	0.00450291	0.435943	1.08455e-19	0.985299	0.414086	0.00464255	0.437532	1.12548e-19	0.985913	0.0531291	0.0485687	0.0221895	0.0296327	0.0823507
adenoviridae	Aconaemys fuscus	Rodentia	Octodontidae	FALSE	0	3.32705e-19	0	0	2.86204e-18	0	0	3.33367e-19	0	2.86773e-18	0	0	0.013881	0.0106273	0.0124171	0.0037402	0.0270677
adenoviridae	Aconaemys porteri	Rodentia	Octodontidae	FALSE	0	2.80581e-35	0	0	0	0	0	2.81144e-35	0	0	0	0	0.0139525	0.0106817	0.0124747	0.00375852	0.0272201
adenoviridae	Aconaemys sagei	Rodentia	Octodontidae	FALSE	0	9.83209e-30	0	0	0	0	0	9.85269e-30	0	0	0	0	0.0143493	0.0109456	0.0127966	0.0038646	0.0279676
adenoviridae	Acrobates pygmaeus	Diprotodontia	Acrobatidae	FALSE	0	0.0132572	0.11498	0	0.112759	0	3.70993e-11	0.0132621	0	0.112778	0	3.80894e-11	0.0125109	0.00667975	0.0168126	0.000803876	0.0312033
adenoviridae	Addax nasomaculatus	Cetartiodactyla	Bovidae	FALSE	0	0.889615	0.307325	0.914343	0.129388	0.799893	0.990846	0.893032	0.914741	0.128014	0.803734	0.991043	0.0419533	0.0270825	0.0431863	0.00787203	0.0948173
adenoviridae	Aegialomys galapagoensis	Rodentia	Cricetidae	FALSE	0	0.0332893	0.179419	1.04732e-27	0.16337	0	2.32872e-06	0.0333056	1.04886e-27	0.163447	0	2.33249e-06	0.0035946	0.00256157	0.00352252	0.000524401	0.00796118
adenoviridae	Aegialomys xanthaeolus	Rodentia	Cricetidae	FALSE	0	0.028315	0.166679	6.44428e-19	0.130736	6.56624e-31	1.51679e-05	0.0283318	6.47258e-19	0.130817	6.56874e-31	1.52115e-05	0.00392573	0.00278738	0.00381335	0.000572743	0.00857488
adenoviridae	Aepeomys lugens	Rodentia	Cricetidae	FALSE	0	0.0194915	0.145373	3.91235e-19	0.112307	3.00941e-39	8.3468e-07	0.0195055	3.92847e-19	0.112377	3.01806e-39	8.3607e-07	0.00362591	0.00258196	0.00354946	0.000529023	0.0079919
adenoviridae	Aepeomys reigi	Rodentia	Cricetidae	FALSE	0	0.0189081	0.134393	1.10563e-22	0.11281	1.50048e-39	3.34869e-08	0.0189202	1.11006e-22	0.112879	1.50113e-39	3.35774e-08	0.00363978	0.00259099	0.00356143	0.000531956	0.0080142
adenoviridae	Aepyceros melampus	Cetartiodactyla	Bovidae	FALSE	0	0.865716	0.336743	0.956647	0.197259	0.615601	0.999225	0.956035	0.98143	0.118152	0.908443	0.99976	0.651425	0.732194	0.263545	0.226737	0.942293
adenoviridae	Aepyprymnus rufescens	Diprotodontia	Potoroidae	FALSE	0	0.274033	0.444785	1.42203e-07	0.415504	6.90918e-21	0.968383	0.274146	1.42787e-07	0.415649	6.98544e-21	0.968679	0.0103292	0.00516514	0.0140326	0.000630333	0.0259424
adenoviridae	Aeretes melanopterus	Rodentia	Sciuridae	FALSE	0	0.0711865	0.253454	8.05206e-15	0.22658	5.82031e-34	0.0720236	0.071301	8.07342e-15	0.226858	5.85782e-34	0.072201	0.00544396	0.00417777	0.00482708	0.000913227	0.0115184
adenoviridae	Aeromys tephromelas	Rodentia	Sciuridae	FALSE	0	0.129174	0.338273	2.43423e-15	0.309841	0	0.841815	0.129281	2.44061e-15	0.310029	0	0.842402	0.00708936	0.00541363	0.00631364	0.0011872	0.0151538
adenoviridae	Aeromys thomasi	Rodentia	Sciuridae	FALSE	0	0.0118131	0.107532	0	0.0931691	0	5.96911e-12	0.0118338	0	0.0933127	0	5.97808e-12	0.00702656	0.00536754	0.00625568	0.00117493	0.0150369
adenoviridae	Aethalops aequalis	Chiroptera	Pteropodidae	FALSE	0	0.459873	0.49921	0.493438	0.427169	8.87451e-12	0.982322	0.460066	0.493733	0.427296	8.97151e-12	0.982399	0.00330496	0.00237376	0.00319305	0.0004735	0.00734593
adenoviridae	Aethalops alecto	Chiroptera	Pteropodidae	FALSE	0	0.533535	0.498421	0.73303	0.401392	1.81134e-08	0.966322	0.533939	0.73526	0.401544	1.82166e-08	0.966371	0.00388361	0.00279612	0.00376381	0.000555606	0.008718
adenoviridae	Aethomys bocagei	Rodentia	Muridae	FALSE	0	0.199556	0.399625	9.62308e-07	0.337109	2.73411e-24	0.796314	0.200134	9.69176e-07	0.337844	2.76407e-24	0.798684	0.0152758	0.0141371	0.0064671	0.00815013	0.0237971
adenoviridae	Aethomys chrysophilus	Rodentia	Muridae	FALSE	0	0.826167	0.375984	0.94707	0.30656	0.0450959	0.996092	0.830654	0.952492	0.306981	0.0502011	0.996722	0.0945553	0.0820364	0.0439766	0.0504252	0.153244
adenoviridae	Aethomys hindei	Rodentia	Muridae	FALSE	0	0.760661	0.420704	0.827468	0.274216	0.179896	0.951983	0.766086	0.834164	0.274669	0.188978	0.953696	0.054774	0.0499077	0.0229005	0.0305583	0.0852165
adenoviridae	Aethomys ineptus	Rodentia	Muridae	FALSE	0	0.70297	0.455275	0.87642	0.36357	8.59139e-06	0.97234	0.708141	0.879789	0.364703	9.30945e-06	0.973525	0.0659441	0.0576183	0.0321652	0.0356831	0.107302
adenoviridae	Aethomys kaiseri	Rodentia	Muridae	FALSE	0	0.948758	0.22243	0.968756	0.0637686	0.87499	0.997594	0.952309	0.970637	0.0595714	0.883577	0.997779	0.0753168	0.0659583	0.0359801	0.0403447	0.12291
adenoviridae	Aethomys nyikae	Rodentia	Muridae	FALSE	0	0.314603	0.466011	0.00225225	0.384319	1.62236e-11	0.85268	0.315648	0.00230056	0.385165	1.64529e-11	0.854007	0.0176299	0.0162598	0.0075752	0.00925136	0.0272718
adenoviridae	Aethomys silindensis	Rodentia	Muridae	FALSE	0	0.892566	0.308986	0.941352	0.185346	0.830898	0.989125	0.893332	0.942151	0.185071	0.832703	0.989233	0.0136502	0.0127557	0.00579339	0.00737432	0.021248
adenoviridae	Aethomys stannarius	Rodentia	Muridae	FALSE	0	0.827161	0.373955	0.911947	0.247734	0.727417	0.979499	0.82819	0.912761	0.247627	0.730491	0.97971	0.0142003	0.013186	0.00601071	0.00760101	0.022106
adenoviridae	Aethomys thomasi	Rodentia	Muridae	FALSE	0	0.351135	0.476368	0.0504837	0.400571	9.09802e-16	0.88951	0.3519	0.0507755	0.401201	9.23409e-16	0.890479	0.0146426	0.0135992	0.00619373	0.00784972	0.0226635
adenoviridae	Ailuropoda melanoleuca	Carnivora	Ursidae	FALSE	0	0.926774	0.260792	0.992167	0.15537	0.776368	0.999969	0.984968	0.997321	0.0310072	0.949136	0.999992	0.682784	0.721845	0.206331	0.375462	0.925413
adenoviridae	Ailurops melanotis	Diprotodontia	Phalangeridae	FALSE	0	0.0103056	0.10616	0	0.0886521	0	2.56903e-29	0.0103139	0	0.0887233	0	2.58052e-29	0.00638481	0.00341063	0.00838551	0.00041933	0.0158562
adenoviridae	Ailurops ursinus	Diprotodontia	Phalangeridae	FALSE	0	0.0262749	0.156732	9.17757e-35	0.128193	0	9.97699e-08	0.0263083	9.17867e-35	0.128334	0	1.00037e-07	0.0103267	0.0055689	0.0134165	0.000697377	0.0258426
adenoviridae	Ailurus fulgens	Carnivora	Ailuridae	FALSE	0	0.813612	0.382933	0.876374	0.175361	0.57775	0.997416	0.916561	0.939521	0.0717443	0.801296	0.998586	0.554357	0.6068	0.228134	0.202636	0.822601
adenoviridae	Akodon aerosus	Rodentia	Cricetidae	FALSE	0	0.0128205	0.113703	3.48081e-23	0.0893793	0	1.1495e-07	0.0128274	3.4841e-23	0.0894037	0	1.15862e-07	0.00378821	0.00269851	0.00369105	0.000554056	0.00832476
adenoviridae	Akodon affinis	Rodentia	Cricetidae	FALSE	0	1.84638e-07	0	5.2347e-30	1.10018e-06	0	9.25871e-12	1.85073e-07	5.24763e-30	1.10352e-06	0	9.26145e-12	0.00388786	0.00276271	0.00377948	0.000569173	0.00849585
adenoviridae	Akodon albiventer	Rodentia	Cricetidae	FALSE	0	0.0152199	0.138967	2.42649e-21	0.114968	0	1.14275e-06	0.0152215	2.4305e-21	0.114971	0	1.14855e-06	0.00448213	0.00311557	0.00432594	0.000647607	0.00970624
adenoviridae	Akodon azarae	Rodentia	Cricetidae	FALSE	0	0.566129	0.495545	0.790878	0.416597	1.66853e-08	0.972652	0.570706	0.79876	0.418978	2.13222e-08	0.97493	0.0723506	0.0572295	0.0522872	0.02588	0.13927
adenoviridae	Akodon boliviensis	Rodentia	Cricetidae	FALSE	0	0.00801399	0.0907255	3.5161e-20	0.0519182	1.69076e-34	3.51502e-07	0.00802156	3.55456e-20	0.0519453	1.71309e-34	3.53713e-07	0.00412102	0.0029159	0.00399028	0.000597739	0.00900845
adenoviridae	Akodon budini	Rodentia	Cricetidae	FALSE	0	0.0419429	0.206865	2.62362e-12	0.174321	1.08678e-25	0.000253637	0.0419689	2.63905e-12	0.174416	1.09176e-25	0.000253802	0.00365644	0.00260184	0.00357585	0.000536284	0.0080745
adenoviridae	Akodon caenosus	Rodentia	Cricetidae	FALSE	0	0.0194272	0.131125	2.00181e-14	0.100835	1.69645e-31	0.000312998	0.0194429	2.00616e-14	0.100903	1.71358e-31	0.000314153	0.00407288	0.00288636	0.00394634	0.000591293	0.00893049
adenoviridae	Akodon cursor	Rodentia	Cricetidae	FALSE	0	0.905334	0.28973	0.919878	0.0738416	0.788608	0.990162	0.913111	0.92334	0.068111	0.807192	0.990658	0.0870197	0.0696445	0.0606287	0.0320953	0.167255
adenoviridae	Akodon dayi	Rodentia	Cricetidae	FALSE	0	0.0888615	0.287324	6.70269e-10	0.236236	1.20672e-23	0.505684	0.0889487	6.74325e-10	0.236387	1.21422e-23	0.506116	0.00436266	0.0030345	0.00421379	0.000629462	0.00948873
adenoviridae	Akodon dolores	Rodentia	Cricetidae	FALSE	0	0.0566173	0.233932	8.31178e-13	0.181132	5.98306e-24	0.0940586	0.0569186	8.40228e-13	0.181757	6.12329e-24	0.0945956	0.0182956	0.0142747	0.0140665	0.00636016	0.0342223
adenoviridae	Akodon fumeus	Rodentia	Cricetidae	FALSE	0	0.0127588	0.11954	2.20091e-17	0.0687244	4.58066e-29	2.93935e-05	0.0127735	2.20458e-17	0.0687795	4.61172e-29	2.95117e-05	0.00401923	0.00284194	0.00389761	0.000584232	0.00882208
adenoviridae	Akodon iniscatus	Rodentia	Cricetidae	FALSE	0	0.0351612	0.185291	4.90316e-16	0.154568	2.77271e-32	0.000777274	0.0352162	4.91041e-16	0.154771	2.80926e-32	0.000778326	0.00448914	0.00312033	0.00433255	0.000649123	0.00972074
adenoviridae	Akodon juninensis	Rodentia	Cricetidae	FALSE	0	0.00723945	0.0791221	6.73082e-24	0.0620662	0	6.36242e-08	0.00724167	6.75965e-24	0.0620843	0	6.36381e-08	0.00380765	0.00270761	0.00370821	0.000558041	0.00836521
adenoviridae	Akodon kofordi	Rodentia	Cricetidae	FALSE	0	0.00781586	0.0879725	3.90891e-32	0.0672335	0	8.28813e-14	0.00781775	3.90977e-32	0.0672497	0	8.29979e-14	0.00361936	0.00257769	0.00354381	0.000528056	0.00798547
adenoviridae	Akodon lindberghi	Rodentia	Cricetidae	FALSE	0	0.692075	0.463025	0.840939	0.328432	0.00175178	0.952257	0.692509	0.842123	0.32847	0.0017541	0.952338	0.00410204	0.00290597	0.00397293	0.000595194	0.00897772
adenoviridae	Akodon lutescens	Rodentia	Cricetidae	FALSE	0	0.00914224	0.0944405	5.64227e-22	0.0520175	6.16655e-34	6.20525e-07	0.00915404	5.66844e-22	0.0520598	6.18711e-34	6.22541e-07	0.0038954	0.00276863	0.00378621	0.000569883	0.00851133
adenoviridae	Akodon mimus	Rodentia	Cricetidae	FALSE	0	0.00851227	0.0944405	2.71356e-23	0.0586713	0	5.87878e-07	0.00851826	2.71817e-23	0.0586939	0	5.89283e-07	0.00374263	0.00267243	0.00365097	0.00054785	0.00822994
adenoviridae	Akodon molinae	Rodentia	Cricetidae	FALSE	0	0.0579629	0.236372	4.52351e-12	0.189602	1.24731e-26	0.0760711	0.0582301	4.6329e-12	0.190177	1.27189e-26	0.0764527	0.0161598	0.0126554	0.0127654	0.00550311	0.0297249
adenoviridae	Akodon mollis	Rodentia	Cricetidae	FALSE	0	0.0011255	0.039968	4.07436e-34	0.00968181	0	1.54573e-14	0.00112619	4.11535e-34	0.00968781	0	1.54845e-14	0.00396067	0.00281087	0.00384474	0.000576734	0.00867897
adenoviridae	Akodon montensis	Rodentia	Cricetidae	FALSE	0	0.891966	0.308986	0.943329	0.170817	0.756906	0.996723	0.9111	0.955669	0.163956	0.811122	0.997686	0.247723	0.224591	0.129231	0.107747	0.433873
adenoviridae	Akodon mystax	Rodentia	Cricetidae	FALSE	0	0.42106	0.494774	0.40975	0.383021	2.11158e-09	0.878824	0.421374	0.409845	0.383208	2.12637e-09	0.879177	0.00371247	0.00264912	0.00362458	0.000543885	0.00816717
adenoviridae	Akodon orophilus	Rodentia	Cricetidae	FALSE	0	0.00799595	0.0885302	7.78302e-32	0.0687837	0	1.31876e-14	0.00799786	7.80725e-32	0.0688001	0	1.32332e-14	0.00366565	0.00260784	0.00358384	0.000537732	0.00810663
adenoviridae	Akodon paranaensis	Rodentia	Cricetidae	FALSE	0	0.648392	0.476938	0.813294	0.350855	5.16595e-07	0.948358	0.650933	0.819109	0.351075	5.43759e-07	0.949126	0.0205078	0.0159279	0.015477	0.00726021	0.0385429
adenoviridae	Akodon pervalens	Rodentia	Cricetidae	FALSE	0	0.0815784	0.277688	7.00683e-09	0.234197	5.63759e-19	0.296924	0.0816355	7.02804e-09	0.234335	5.66154e-19	0.297192	0.00386372	0.00274601	0.00375795	0.000566896	0.00845692
adenoviridae	Akodon philipmyersi	Rodentia	Cricetidae	FALSE	0	0.237641	0.428294	3.27917e-06	0.346395	1.62546e-13	0.817161	0.237848	3.28683e-06	0.346635	1.62733e-13	0.817951	0.00362605	0.00258205	0.00354959	0.000529045	0.00799204
adenoviridae	Akodon polopi	Rodentia	Cricetidae	FALSE	0	0.0457818	0.201727	7.62581e-11	0.179833	3.78207e-20	0.0120211	0.0458083	7.68456e-11	0.179898	3.79512e-20	0.0120558	0.0037594	0.00268227	0.00366569	0.000550054	0.00826482
adenoviridae	Akodon reigi	Rodentia	Cricetidae	FALSE	0	0.0587042	0.230115	3.5875e-12	0.201957	1.15946e-31	0.00178161	0.0587285	3.60294e-12	0.202041	1.1666e-31	0.00178952	0.00376106	0.00268324	0.00366714	0.000550272	0.00826827
adenoviridae	Akodon sanctipaulensis	Rodentia	Cricetidae	FALSE	0	0.433509	0.496002	0.608351	0.371535	1.47043e-10	0.836109	0.43388	0.60877	0.371793	1.47666e-10	0.836555	0.0038361	0.00272704	0.00373341	0.000564292	0.00841486
adenoviridae	Akodon serrensis	Rodentia	Cricetidae	FALSE	0	0.464407	0.498759	0.697274	0.387093	1.86095e-10	0.869287	0.466132	0.700484	0.388274	1.94265e-10	0.870857	0.0185465	0.0144922	0.0142237	0.00647439	0.0347619
adenoviridae	Akodon siberiae	Rodentia	Cricetidae	FALSE	0	0.0265019	0.164112	9.97676e-15	0.102817	1.54362e-26	0.00161535	0.0265215	1.00184e-14	0.102888	1.55378e-26	0.00162055	0.00368536	0.00262474	0.00360095	0.000540322	0.00814338
adenoviridae	Akodon simulator	Rodentia	Cricetidae	FALSE	0	0.0454828	0.204873	1.61885e-11	0.164071	1.11472e-22	0.00289003	0.045592	1.6552e-11	0.164346	1.12507e-22	0.00292401	0.0149005	0.0117289	0.0120368	0.00499395	0.0272241
adenoviridae	Akodon spegazzinii	Rodentia	Cricetidae	FALSE	0	0.0156135	0.118315	3.32102e-16	0.100454	2.44671e-26	0.000143861	0.0156236	3.32869e-16	0.100523	2.45797e-26	0.000144102	0.00402053	0.00284294	0.00389879	0.000584402	0.00882479
adenoviridae	Akodon subfuscus	Rodentia	Cricetidae	FALSE	0	0.00786775	0.0890842	2.93729e-28	0.0676809	0	4.25656e-12	0.00786998	2.94371e-28	0.0677	0	4.27002e-12	0.00401145	0.00283807	0.00389057	0.000583208	0.00880572
adenoviridae	Akodon surdus	Rodentia	Cricetidae	FALSE	0	0.00723326	0.0797436	5.86462e-29	0.0621851	0	6.41557e-14	0.0072352	5.89649e-29	0.0622017	0	6.42525e-14	0.00362263	0.00257983	0.00354664	0.00052854	0.00798869
adenoviridae	Akodon sylvanus	Rodentia	Cricetidae	FALSE	0	0.0568418	0.229341	5.37877e-12	0.190247	1.82352e-24	0.0273859	0.0568767	5.38017e-12	0.190356	1.8332e-24	0.0274408	0.0036183	0.00257701	0.00354291	0.000527901	0.00798444
adenoviridae	Akodon toba	Rodentia	Cricetidae	FALSE	0	0.121157	0.321896	1.82511e-08	0.263491	9.67451e-18	0.643296	0.121267	1.83323e-08	0.263661	9.72734e-18	0.643693	0.00449769	0.0031259	0.00434062	0.000650974	0.00973844
adenoviridae	Akodon torques	Rodentia	Cricetidae	FALSE	0	0.00744608	0.0907255	6.09255e-29	0.0640519	0	7.96993e-14	0.00744807	6.10678e-29	0.0640691	0	7.98534e-14	0.00370597	0.00264328	0.00361891	0.000543031	0.00815366
adenoviridae	Akodon varius	Rodentia	Cricetidae	FALSE	0	0.162516	0.370548	2.31992e-07	0.312809	5.43997e-17	0.764293	0.162925	2.362e-07	0.313513	5.55416e-17	0.766135	0.0158784	0.0124948	0.0125997	0.00537954	0.0291209
adenoviridae	Alcelaphus buselaphus	Cetartiodactyla	Bovidae	FALSE	0	0.895447	0.300798	0.966302	0.198409	0.737423	0.999673	0.938047	0.984314	0.170264	0.917598	0.999873	0.535547	0.564894	0.249081	0.163337	0.848074
adenoviridae	Alces alces	Cetartiodactyla	Cervidae	TRUE	1	1	0	1	0	1	1	0.981307	0.992067	0.0283571	0.947291	0.999903	0.80043	0.825171	0.133278	0.613084	0.951383
adenoviridae	Alionycteris paucidentata	Chiroptera	Pteropodidae	FALSE	0	0.315335	0.464556	0.000152852	0.381563	7.68055e-16	0.846889	0.315517	0.00015333	0.381731	7.69095e-16	0.847354	0.00281619	0.00199627	0.00273096	0.000385176	0.00635642
adenoviridae	Allactaga balikunica	Rodentia	Dipodidae	FALSE	0	0.327094	0.467129	0.00119725	0.406972	1.218e-26	0.90635	0.327432	0.00121177	0.40727	1.23748e-26	0.907211	0.00775803	0.00545075	0.00797998	0.00111356	0.0173367
adenoviridae	Allactaga bullata	Rodentia	Dipodidae	FALSE	0	0.411518	0.492756	0.323136	0.406026	1.59646e-18	0.925508	0.412398	0.325862	0.406552	1.61848e-18	0.925855	0.0131625	0.00931128	0.0137778	0.00175126	0.0301396
adenoviridae	Allactaga elater	Rodentia	Dipodidae	FALSE	0	0.719989	0.449731	0.819397	0.288649	0.0622051	0.946078	0.723464	0.823244	0.289109	0.0635881	0.948215	0.0291862	0.0246832	0.0202728	0.0100874	0.0547948
adenoviridae	Allactaga euphratica	Rodentia	Dipodidae	FALSE	0	0.328634	0.467471	3.73313e-09	0.444495	1.28104e-34	0.995575	0.328762	3.7946e-09	0.444636	1.28989e-34	0.995603	0.00922081	0.00641716	0.00952504	0.00127476	0.020811
adenoviridae	Allactaga firouzi	Rodentia	Dipodidae	FALSE	0	0.10946	0.311639	2.17927e-11	0.270986	1.14652e-29	0.64852	0.109569	2.1867e-11	0.271197	1.14989e-29	0.649047	0.00680488	0.00472763	0.00700409	0.00095269	0.0150377
adenoviridae	Allactaga hotsoni	Rodentia	Dipodidae	FALSE	0	0.220262	0.418827	1.67692e-09	0.384981	1.66615e-39	0.935607	0.220388	1.70753e-09	0.385153	1.68804e-39	0.935831	0.00773472	0.00543734	0.00795574	0.00110962	0.0172676
adenoviridae	Allactaga major	Rodentia	Dipodidae	FALSE	0	0.237535	0.428955	5.52429e-07	0.369529	1.82869e-33	0.879877	0.237969	5.53969e-07	0.37002	1.89514e-33	0.880065	0.0122272	0.00859177	0.0127665	0.00163122	0.0280443
adenoviridae	Allactaga severtzovi	Rodentia	Dipodidae	FALSE	0	0.14608	0.350175	2.60678e-14	0.298555	0	0.767938	0.146296	2.63764e-14	0.298969	0	0.770313	0.00816639	0.00571192	0.00840694	0.00116092	0.0180805
adenoviridae	Allactaga sibirica	Rodentia	Dipodidae	FALSE	0	0.911546	0.291829	0.969681	0.172606	0.819088	0.999959	0.917321	0.971858	0.169286	0.837881	0.999962	0.105257	0.0886208	0.0674002	0.0387031	0.19456
adenoviridae	Allactaga tetradactyla	Rodentia	Dipodidae	FALSE	0	0.332773	0.469338	1.69283e-05	0.419159	1.24145e-29	0.930582	0.333064	1.70488e-05	0.419408	1.26944e-29	0.930854	0.00712431	0.00499028	0.00732727	0.000996582	0.0155713
adenoviridae	Allactaga toussi	Rodentia	Dipodidae	FALSE	0	0.447399	0.497151	0.563911	0.378765	2.53018e-13	0.904301	0.448041	0.565106	0.379124	2.54376e-13	0.904917	0.00724304	0.00509145	0.00744848	0.0010261	0.0159277
adenoviridae	Allactaga vinogradovi	Rodentia	Dipodidae	FALSE	0	0.139648	0.343107	1.33063e-09	0.291585	3.72074e-30	0.723914	0.139845	1.3474e-09	0.29191	3.72625e-30	0.725289	0.00691175	0.00480436	0.00711171	0.000969297	0.0152134
adenoviridae	Allactaga williamsi	Rodentia	Dipodidae	FALSE	0	0.209716	0.409287	2.69778e-07	0.354757	6.80981e-28	0.846162	0.210014	2.72018e-07	0.355151	6.81315e-28	0.847835	0.00921336	0.00641165	0.00951708	0.00127434	0.0207917
adenoviridae	Allactodipus bobrinskii	Rodentia	Dipodidae	FALSE	0	0.531858	0.499038	0.738495	0.388652	1.60828e-06	0.938339	0.532559	0.740376	0.388956	1.63315e-06	0.938646	0.00731932	0.00515844	0.00752664	0.00103964	0.0161354
adenoviridae	Allenopithecus nigroviridis	Primates	Cercopithecidae	FALSE	0	0.919977	0.272835	0.989046	0.174967	0.795963	0.999831	0.931956	0.991072	0.159798	0.845527	0.999862	0.225881	0.215962	0.0739198	0.139464	0.328356
adenoviridae	Allocebus trichotis	Primates	Cheirogaleidae	FALSE	0	0.164597	0.369274	0	0.345386	0	0.861477	0.165121	0	0.346361	0	0.863759	0.0349235	0.0278009	0.0261232	0.00955855	0.0724275
adenoviridae	Allochrocebus lhoesti	Primates	Cercopithecidae	FALSE	0	0.951408	0.221623	0.978946	0.062906	0.822679	0.999461	0.95751	0.980788	0.0547875	0.85617	0.99952	0.116738	0.109463	0.0440417	0.0686525	0.175995
adenoviridae	Allochrocebus preussi	Primates	Cercopithecidae	TRUE	1	1	0	1	0	1	1	0.975383	0.991132	0.0376499	0.930531	0.999943	0.30642	0.295316	0.0925523	0.197198	0.432945
adenoviridae	Allochrocebus solatus	Primates	Cercopithecidae	FALSE	0	0.895694	0.308731	0.977122	0.218876	0.744813	0.999854	0.902639	0.98047	0.215462	0.778782	0.99987	0.135393	0.128356	0.0492735	0.0795033	0.20447
adenoviridae	Allocricetulus curtatus	Rodentia	Cricetidae	FALSE	0	0.604337	0.488872	0.760322	0.331753	1.28629e-07	0.901246	0.605076	0.762233	0.33204	1.29118e-07	0.902232	0.00540388	0.00370769	0.0052184	0.000772821	0.0117133
adenoviridae	Allocricetulus eversmanni	Rodentia	Cricetidae	FALSE	0	0.513059	0.499854	0.692215	0.348736	2.08405e-06	0.890149	0.515639	0.693729	0.349834	2.11557e-06	0.890863	0.0184659	0.0144031	0.0141731	0.00644136	0.0345631
adenoviridae	Alouatta arctoidea	Primates	Atelidae	FALSE	0	0.856674	0.349869	0.952102	0.273185	0.747186	0.998502	0.857832	0.952731	0.272896	0.751411	0.998518	0.022556	0.0162795	0.0214255	0.00381895	0.0481933
adenoviridae	Alouatta belzebul	Primates	Atelidae	FALSE	0	0.91695	0.278733	0.956405	0.140534	0.798971	0.998584	0.934464	0.967847	0.133201	0.869925	0.99887	0.255793	0.24593	0.0986869	0.136035	0.391009
adenoviridae	Alouatta caraya	Primates	Atelidae	FALSE	0	0.953362	0.217117	0.998331	0.0975527	0.872981	1	0.979968	0.998832	0.0416609	0.94371	1	0.510595	0.522561	0.150293	0.309389	0.704325
adenoviridae	Alouatta discolor	Primates	Atelidae	FALSE	0	0.924775	0.256658	0.962366	0.149658	0.853731	0.998297	0.92564	0.963611	0.149316	0.854859	0.998326	0.0212235	0.0154594	0.0202548	0.0036038	0.0453235
adenoviridae	Alouatta guariba	Primates	Atelidae	FALSE	0	0.948779	0.227394	0.995339	0.162767	0.898457	0.999951	0.956826	0.997247	0.161288	0.936025	0.99996	0.326736	0.318131	0.115861	0.184611	0.481101
adenoviridae	Alouatta juara	Primates	Atelidae	FALSE	0	0.912898	0.279624	0.964664	0.18706	0.85656	0.998896	0.914392	0.965538	0.186819	0.859122	0.998921	0.033819	0.0237434	0.0315837	0.00568077	0.0732622
adenoviridae	Alouatta macconnelli	Primates	Atelidae	FALSE	0	0.910161	0.28344	0.965864	0.195343	0.860818	0.9989	0.917705	0.972594	0.194215	0.879389	0.999008	0.133634	0.123607	0.0602839	0.0658262	0.209108
adenoviridae	Alouatta nigerrima	Primates	Atelidae	FALSE	0	0.911922	0.295412	0.952968	0.160261	0.839909	0.993341	0.912924	0.95352	0.160127	0.841289	0.993462	0.0200798	0.0146883	0.019263	0.00338402	0.0435521
adenoviridae	Alouatta palliata	Primates	Atelidae	FALSE	0	0.953891	0.207084	0.983814	0.0712454	0.884066	0.999916	0.973408	0.992496	0.0403721	0.919314	0.999954	0.391466	0.390052	0.130761	0.224628	0.565308
adenoviridae	Alouatta pigra	Primates	Atelidae	TRUE	1	1	0	1	0	1	1	0.956493	0.978336	0.0627066	0.894207	0.998872	0.232674	0.223	0.0927562	0.122002	0.357766
adenoviridae	Alouatta puruensis	Primates	Atelidae	FALSE	0	0.904175	0.301858	0.965644	0.188657	0.824984	0.997372	0.905552	0.966242	0.188326	0.826088	0.997417	0.0262161	0.0187492	0.0246963	0.0045643	0.0560025
adenoviridae	Alouatta sara	Primates	Atelidae	FALSE	0	0.897491	0.300266	0.965412	0.188747	0.780683	0.997869	0.908663	0.968865	0.184263	0.822002	0.998118	0.14589	0.136341	0.0630888	0.0732112	0.229692
adenoviridae	Alouatta seniculus	Primates	Atelidae	FALSE	0	0.863963	0.343425	0.948813	0.20722	0.649567	0.998028	0.917006	0.972925	0.182565	0.857242	0.999006	0.489241	0.498541	0.149023	0.292563	0.682164
adenoviridae	Alouatta ululata	Primates	Atelidae	FALSE	0	0.938646	0.249675	0.975622	0.120674	0.873292	0.999506	0.939424	0.976029	0.120391	0.879521	0.999519	0.0189856	0.0137434	0.0183282	0.00317051	0.0410933
adenoviridae	Alticola albicaudus	Rodentia	Cricetidae	FALSE	0	0.301508	0.457776	0.000399098	0.369895	1.83608e-20	0.816151	0.301767	0.000399741	0.370141	1.84072e-20	0.816625	0.00361218	0.00257302	0.00353763	0.000526996	0.00797843
adenoviridae	Alticola argentatus	Rodentia	Cricetidae	FALSE	0	0.711904	0.452031	0.765212	0.214326	0.489874	0.888336	0.716458	0.76682	0.214028	0.492929	0.890993	0.0263086	0.0207223	0.0193462	0.00941182	0.0500038
adenoviridae	Alticola barakshin	Rodentia	Cricetidae	FALSE	0	0.350287	0.47354	0.286931	0.35356	5.7035e-18	0.782666	0.350668	0.287276	0.353878	5.72878e-18	0.783576	0.00405856	0.00287466	0.00393331	0.000589408	0.00890433
adenoviridae	Alticola lemminus	Rodentia	Cricetidae	FALSE	0	0.371683	0.482179	0.557019	0.361215	5.80243e-11	0.799974	0.372074	0.557211	0.361559	5.80497e-11	0.800659	0.00432667	0.00301765	0.00418021	0.000624719	0.00939226
adenoviridae	Alticola macrotis	Rodentia	Cricetidae	FALSE	0	0.604912	0.488285	0.72521	0.315342	1.95289e-05	0.90654	0.605534	0.725499	0.315476	1.96068e-05	0.907145	0.00402541	0.00284673	0.00390321	0.000585045	0.008835
adenoviridae	Alticola montosa	Rodentia	Cricetidae	FALSE	0	0.341454	0.473978	0.000887928	0.441686	6.0564e-25	0.995652	0.341585	0.000895014	0.441802	6.07398e-25	0.995664	0.00370164	0.00263939	0.00361514	0.000542462	0.00815135
adenoviridae	Alticola olchonensis	Rodentia	Cricetidae	FALSE	0	0.875636	0.331511	0.907093	0.123723	0.774982	0.991521	0.875967	0.907704	0.123628	0.776116	0.991572	0.00359677	0.00256298	0.00352438	0.000524722	0.00796331
adenoviridae	Alticola roylei	Rodentia	Cricetidae	FALSE	0	0.435311	0.496411	0.0136959	0.461755	2.39012e-24	0.999736	0.435441	0.0137013	0.461861	2.39523e-24	0.999737	0.00387705	0.00275516	0.00376983	0.000568153	0.00847723
adenoviridae	Alticola semicanus	Rodentia	Cricetidae	FALSE	0	0.373119	0.484711	0.00591852	0.413319	3.14146e-16	0.978983	0.373413	0.00594832	0.413521	3.15745e-16	0.979042	0.00452983	0.00314795	0.00437099	0.000657927	0.00980086
adenoviridae	Alticola stoliczkanus	Rodentia	Cricetidae	FALSE	0	0.379936	0.485088	0.0601567	0.41091	1.10906e-20	0.947235	0.38042	0.0604984	0.411217	1.11707e-20	0.947487	0.00724949	0.00502723	0.00708624	0.00101641	0.0156779
adenoviridae	Alticola strelzowi	Rodentia	Cricetidae	FALSE	0	0.741656	0.438744	0.831861	0.305743	0.0345952	0.984671	0.7421	0.832411	0.305766	0.0349253	0.984737	0.00407256	0.0028861	0.00394605	0.000591251	0.00892997
adenoviridae	Alticola tuvinicus	Rodentia	Cricetidae	FALSE	0	0.619984	0.484988	0.763587	0.314507	0.00010202	0.89037	0.620499	0.763842	0.314701	0.000102246	0.891094	0.00376022	0.00268275	0.00366641	0.000550163	0.00826653
adenoviridae	Amblysomus corriae	Afrosoricida	Chrysochloridae	FALSE	0	1.06198e-11	0	0	9.09984e-11	0	0	1.06513e-11	0	9.12658e-11	0	0	0.00785003	0.00459746	0.0107264	0.000599358	0.0194624
adenoviridae	Amblysomus hottentotus	Afrosoricida	Chrysochloridae	FALSE	0	3.06516e-08	0	0	2.63673e-07	0	0	3.0747e-08	0	2.64494e-07	0	0	0.0082906	0.00488487	0.0113784	0.000635398	0.0204443
adenoviridae	Amblysomus marleyi	Afrosoricida	Chrysochloridae	FALSE	0	3.52185e-06	0	0	3.02961e-05	0	0	3.53063e-06	0	3.03716e-05	0	0	0.00672088	0.00384836	0.00907404	0.000509418	0.0167446
adenoviridae	Amblysomus robustus	Afrosoricida	Chrysochloridae	FALSE	0	1.985e-10	0	0	1.4969e-09	0	0	1.98957e-10	0	1.50059e-09	0	0	0.00671457	0.0038433	0.00906494	0.000509059	0.0167329
adenoviridae	Amblysomus septentrionalis	Afrosoricida	Chrysochloridae	FALSE	0	3.17788e-09	0	0	2.45638e-08	0	0	3.18191e-09	0	2.45914e-08	0	0	0.00706483	0.00400818	0.00957309	0.000537332	0.0175417
adenoviridae	Ametrida centurio	Chiroptera	Phyllostomidae	FALSE	0	0.662966	0.476016	0.793489	0.321247	0.000152783	0.892165	0.663462	0.794051	0.321424	0.000153933	0.892546	0.00542197	0.00413415	0.00476849	0.000884657	0.0119134
adenoviridae	Ammodillus imbellis	Rodentia	Muridae	FALSE	0	0.137133	0.339683	4.70173e-09	0.28664	6.08071e-28	0.686112	0.137547	4.7512e-09	0.287311	6.19793e-28	0.689375	0.0148058	0.0137544	0.00626296	0.00797817	0.0229343
adenoviridae	Ammodorcas clarkei	Cetartiodactyla	Bovidae	FALSE	0	0.535795	0.498445	0.760714	0.437563	1.15071e-21	0.990368	0.536052	0.762319	0.437664	1.15947e-21	0.990436	0.00591834	0.00327491	0.007437	0.000419394	0.0150333
adenoviridae	Ammospermophilus harrisii	Rodentia	Sciuridae	FALSE	0	0.576364	0.494538	0.77039	0.397094	1.77599e-08	0.963463	0.576735	0.770826	0.397249	1.78176e-08	0.963628	0.00483421	0.00372195	0.00430291	0.000835739	0.0103653
adenoviridae	Ammospermophilus interpres	Rodentia	Sciuridae	FALSE	0	0.415464	0.49328	0.245824	0.416521	5.93865e-14	0.947948	0.415747	0.247797	0.416699	5.96538e-14	0.948343	0.0047172	0.00363972	0.00420493	0.000813688	0.0100324
adenoviridae	Ammospermophilus leucurus	Rodentia	Sciuridae	FALSE	0	0.617808	0.486666	0.832628	0.406971	8.03943e-08	0.995711	0.618259	0.833262	0.407137	8.06935e-08	0.995737	0.00704521	0.00537975	0.00627288	0.00117858	0.0150716
adenoviridae	Ammospermophilus nelsoni	Rodentia	Sciuridae	FALSE	0	0.83295	0.373333	0.948271	0.285567	0.505474	0.998666	0.836462	0.94982	0.285091	0.520365	0.998707	0.0572895	0.0466484	0.0405404	0.0211979	0.106944
adenoviridae	Ammotragus lervia	Cetartiodactyla	Bovidae	FALSE	0	0.863332	0.353307	0.898365	0.170231	0.758984	0.992648	0.873722	0.905018	0.166875	0.792224	0.993939	0.10496	0.0720449	0.0959804	0.0204844	0.234575
adenoviridae	Amorphochilus schnablii	Chiroptera	Furipteridae	FALSE	0	0.111826	0.31038	4.34096e-12	0.285403	4.55316e-34	0.781449	0.11189	4.35333e-12	0.285554	4.57386e-34	0.781816	0.00392548	0.00268422	0.00426783	0.000514446	0.00856476
adenoviridae	Anathana ellioti	Scandentia	Tupaiidae	FALSE	0	0.484872	0.499906	0.738446	0.449829	9.9009e-22	0.998031	0.485435	0.738679	0.450218	9.95392e-22	0.998041	0.0166461	0.0101318	0.0200353	0.00141201	0.0390379
adenoviridae	Andalgalomys olrogi	Rodentia	Cricetidae	FALSE	0	0.0112498	0.11154	3.51255e-16	0.0950943	7.51904e-32	8.35193e-06	0.0112575	3.5147e-16	0.0951521	7.56092e-32	8.36848e-06	0.00372557	0.00266091	0.00363603	0.000545607	0.00819444
adenoviridae	Andalgalomys pearsoni	Rodentia	Cricetidae	FALSE	0	0.0630486	0.23988	5.12705e-11	0.208486	5.3424e-23	0.0107021	0.0630851	5.1348e-11	0.2086	5.35998e-23	0.0107549	0.00390636	0.00277541	0.00379601	0.000570917	0.00853385
adenoviridae	Andinomys edax	Rodentia	Cricetidae	FALSE	0	1.64618e-05	0	5.81083e-26	9.5594e-05	0	2.96598e-08	1.65021e-05	5.89758e-26	9.58789e-05	0	2.98543e-08	0.0040895	0.00289942	0.00396149	0.000593513	0.00895741
adenoviridae	Anisomys imitator	Rodentia	Muridae	FALSE	0	0.00746547	0.0879725	2.4368e-30	0.0640879	0	3.51691e-08	0.00749345	2.45842e-30	0.0643268	0	3.53451e-08	0.0151866	0.0140584	0.00642785	0.0081175	0.0236983
adenoviridae	Anomalurus beecrofti	Rodentia	Anomaluridae	FALSE	0	0.102228	0.297179	8.20019e-22	0.277866	0	0.739089	0.102426	8.41844e-22	0.278397	0	0.740522	0.0217957	0.0158907	0.0204377	0.0032217	0.0501157
adenoviridae	Anomalurus derbianus	Rodentia	Anomaluridae	FALSE	0	0.208742	0.408584	8.09844e-12	0.373583	0	0.91839	0.209607	8.17883e-12	0.37449	0	0.919599	0.0223762	0.016287	0.0209887	0.00329182	0.0514701
adenoviridae	Anomalurus pelii	Rodentia	Anomaluridae	FALSE	0	0.121091	0.322726	1.58359e-10	0.291981	0	0.737997	0.121295	1.6056e-10	0.292374	0	0.741196	0.0116533	0.00850744	0.0108509	0.00170178	0.0266607
adenoviridae	Anomalurus pusillus	Rodentia	Anomaluridae	FALSE	0	0.222517	0.410961	7.08337e-09	0.375733	0	0.946303	0.222898	7.5862e-09	0.376202	0	0.946618	0.0169483	0.0122767	0.015826	0.00255172	0.0389656
adenoviridae	Anonymomys mindorensis	Rodentia	Muridae	FALSE	0	0.00876606	0.0885302	4.57432e-33	0.0753719	0	9.53981e-13	0.00881443	4.61709e-33	0.0757879	0	9.6362e-13	0.0133741	0.0124983	0.00568903	0.00726257	0.0207156
adenoviridae	Anoura aequatoris	Chiroptera	Phyllostomidae	FALSE	0	0.407292	0.49187	0.197776	0.411517	8.95573e-11	0.907477	0.407414	0.198195	0.411616	8.96593e-11	0.907751	0.0027253	0.00202103	0.00245217	0.000439375	0.00594026
adenoviridae	Anoura cadenai	Chiroptera	Phyllostomidae	FALSE	0	0.392025	0.48961	0.026568	0.418191	1.22292e-11	0.906304	0.39211	0.0265756	0.418267	1.2289e-11	0.90632	0.0023453	0.00171291	0.00216017	0.00037669	0.00526496
adenoviridae	Anoura caudifer	Chiroptera	Phyllostomidae	TRUE	1	1	0	1	0	1	1	0.904288	0.924354	0.077421	0.808093	0.994779	0.340409	0.33768	0.0796173	0.240383	0.445577
adenoviridae	Anoura cultrata	Chiroptera	Phyllostomidae	FALSE	0	0.402869	0.491199	0.510736	0.397389	1.73831e-09	0.878536	0.403063	0.51178	0.39754	1.74548e-09	0.878734	0.00338344	0.0025217	0.00299012	0.000550923	0.00750948
adenoviridae	Anoura fistulata	Chiroptera	Phyllostomidae	FALSE	0	0.43783	0.496625	0.561211	0.393742	6.49586e-10	0.900349	0.437986	0.561434	0.393839	6.50829e-10	0.900505	0.00236176	0.0017251	0.00217243	0.000380238	0.00528443
adenoviridae	Anoura geoffroyi	Chiroptera	Phyllostomidae	FALSE	0	0.793953	0.406666	0.93057	0.317008	0.00823914	0.998315	0.826754	0.962693	0.31708	0.0180227	0.999051	0.46459	0.467166	0.094837	0.341627	0.584636
adenoviridae	Anoura latidens	Chiroptera	Phyllostomidae	FALSE	0	0.500383	0.499948	0.777822	0.429354	2.44296e-10	0.933162	0.500499	0.778163	0.42944	2.45021e-10	0.933491	0.00305493	0.00228767	0.00271762	0.000497651	0.00668261
adenoviridae	Anoura luismanueli	Chiroptera	Phyllostomidae	FALSE	0	0.400811	0.489506	0.0637681	0.417954	5.03619e-13	0.90572	0.400896	0.0639029	0.418031	5.0472e-13	0.905737	0.00238521	0.00174344	0.00218996	0.00038531	0.00532122
adenoviridae	Anoura peruana	Chiroptera	Phyllostomidae	FALSE	0	0.462026	0.498766	0.659949	0.453946	6.56498e-09	0.992104	0.462109	0.660137	0.453997	6.57403e-09	0.992142	0.00318983	0.00238718	0.00282869	0.000522342	0.00703525
adenoviridae	Anourosorex assamensis	Eulipotyphla	Soricidae	FALSE	0	0.3836	0.488373	0.522533	0.355906	6.24937e-17	0.800186	0.384109	0.522707	0.356311	6.2663e-17	0.801216	0.00449672	0.00331404	0.00457853	0.000993269	0.00905486
adenoviridae	Anourosorex schmidi	Eulipotyphla	Soricidae	FALSE	0	0.2839	0.449925	0.000289451	0.346222	4.14559e-20	0.793593	0.284232	0.000290715	0.346588	4.1651e-20	0.794461	0.00438833	0.00323073	0.00448269	0.000968131	0.00879143
adenoviridae	Anourosorex squamipes	Eulipotyphla	Soricidae	FALSE	0	0.880459	0.320584	0.894273	0.0917927	0.754854	0.995198	0.900841	0.9186	0.0782289	0.782859	0.996708	0.172511	0.111169	0.17247	0.0163178	0.420939
adenoviridae	Anourosorex yamashinai	Eulipotyphla	Soricidae	FALSE	0	0.565341	0.495585	0.741041	0.34812	3.87874e-06	0.878745	0.566734	0.74197	0.348447	3.92243e-06	0.87995	0.00937144	0.00630975	0.0106947	0.00205099	0.0192224
adenoviridae	Antechinomys laniger	Dasyuromorphia	Dasyuridae	FALSE	0	0.01621	0.121951	0	0.0989534	0	1.81074e-08	0.0162743	0	0.0993924	0	1.84379e-08	0.0179147	0.012199	0.0177416	0.00337747	0.0398376
adenoviridae	Antechinus adustus	Dasyuromorphia	Dasyuridae	FALSE	0	4.68808e-12	0	0	4.03284e-11	0	0	4.70562e-12	0	4.04792e-11	0	0	0.013345	0.00910381	0.0135506	0.00249301	0.0287701
adenoviridae	Antechinus agilis	Dasyuromorphia	Dasyuridae	FALSE	0	4.6207e-06	0	0	2.95163e-05	0	2.18122e-25	4.64354e-06	0	2.96586e-05	0	2.19632e-25	0.016311	0.0113437	0.0162417	0.00308736	0.0358264
adenoviridae	Antechinus bellus	Dasyuromorphia	Dasyuridae	FALSE	0	0.00973006	0.103833	0	0.0837011	0	2.38066e-36	0.00976436	0	0.0839963	0	2.42154e-36	0.0134599	0.00916206	0.013652	0.00251141	0.0291474
adenoviridae	Antechinus flavipes	Dasyuromorphia	Dasyuridae	FALSE	0	0.00969513	0.100965	0	0.0833813	0	2.33805e-22	0.00975108	0	0.0838624	0	2.45528e-22	0.0237121	0.0163409	0.0232663	0.00431783	0.0534046
adenoviridae	Antechinus godmani	Dasyuromorphia	Dasyuridae	FALSE	0	3.72099e-07	0	0	3.20091e-06	0	0	3.73488e-07	0	3.21287e-06	0	0	0.0133245	0.0090946	0.0135326	0.00249086	0.0286799
adenoviridae	Antechinus leo	Dasyuromorphia	Dasyuridae	FALSE	0	0.00979088	0.0949589	0	0.0842243	0	0	0.00982457	0	0.0845141	0	0	0.0133383	0.00910079	0.0135447	0.0024923	0.0287404
adenoviridae	Antechinus minimus	Dasyuromorphia	Dasyuridae	FALSE	0	1.81916e-12	0	0	1.52104e-11	0	2.23864e-23	1.8355e-12	0	1.5348e-11	0	2.26946e-23	0.0229628	0.0157997	0.0225486	0.00420368	0.0516475
adenoviridae	Antechinus stuartii	Dasyuromorphia	Dasyuridae	FALSE	0	3.04655e-14	0	0	2.62059e-13	0	3.86719e-25	3.07764e-14	0	2.64734e-13	0	4.04329e-25	0.0181136	0.0124064	0.017929	0.00340575	0.0403439
adenoviridae	Antechinus subtropicus	Dasyuromorphia	Dasyuridae	FALSE	0	2.94376e-11	0	0	2.5191e-10	0	2.75563e-25	2.9553e-11	0	2.52879e-10	0	2.76607e-25	0.0137015	0.0092977	0.013866	0.00260322	0.029815
adenoviridae	Antechinus swainsonii	Dasyuromorphia	Dasyuridae	FALSE	0	4.22331e-07	0	0	3.08309e-06	0	1.25728e-18	4.30659e-07	0	3.14989e-06	0	1.28591e-18	0.0245908	0.016964	0.0241081	0.00446976	0.0554718
adenoviridae	Anthops ornatus	Chiroptera	Hipposideridae	FALSE	0	0.0239345	0.15336	0	0.140379	0	1.27721e-11	0.0239491	0	0.140459	0	1.27834e-11	0.0035547	0.00251721	0.00365357	0.000516319	0.00783592
adenoviridae	Antidorcas marsupialis	Cetartiodactyla	Bovidae	FALSE	0	0.892866	0.310507	0.957648	0.170167	0.644362	0.999553	0.964726	0.988393	0.0498118	0.886616	0.999827	0.595557	0.659567	0.263857	0.185546	0.904934
adenoviridae	Antilocapra americana	Cetartiodactyla	Antilocapridae	TRUE	1	1	0	1	0	1	1	0.973935	0.99342	0.0525174	0.946385	0.999999	0.3941	0.378074	0.188193	0.159807	0.642625
adenoviridae	Antilope cervicapra	Cetartiodactyla	Bovidae	FALSE	0	0.894709	0.305131	0.969804	0.208351	0.781883	0.999637	0.905794	0.974402	0.203528	0.811001	0.999776	0.196951	0.151741	0.152275	0.041331	0.407949
adenoviridae	Antrozous pallidus	Chiroptera	Vespertilionidae	FALSE	0	0.914038	0.278584	0.976147	0.169039	0.825334	0.999551	0.918903	0.978384	0.165617	0.837492	0.999608	0.0924462	0.090135	0.0220317	0.0671754	0.120496
adenoviridae	Aotus azarae	Primates	Aotidae	FALSE	0	0.904632	0.285751	0.922131	0.0801101	0.807342	0.982164	0.926968	0.941784	0.0632117	0.839198	0.987816	0.238283	0.233927	0.0853032	0.13238	0.348281
adenoviridae	Aotus brumbacki	Primates	Aotidae	FALSE	0	0.960969	0.19047	0.985768	0.0508152	0.88186	0.999816	0.962282	0.986433	0.0490049	0.886444	0.999825	0.0478129	0.0404527	0.0315458	0.0151038	0.0903361
adenoviridae	Aotus griseimembra	Primates	Aotidae	TRUE	1	1	0	1	0	1	1	0.979614	0.99357	0.0328808	0.941943	0.999983	0.0645727	0.0557365	0.0416811	0.0212314	0.122976
adenoviridae	Aotus jorgehernandezi	Primates	Aotidae	FALSE	0	0.363219	0.481514	6.52476e-05	0.438406	2.585e-17	0.948826	0.364926	6.72791e-05	0.44027	2.73822e-17	0.950927	0.0458065	0.0385868	0.0304184	0.0144014	0.0866391
adenoviridae	Aotus lemurinus	Primates	Aotidae	TRUE	1	1	0	1	0	1	1	0.96837	0.990203	0.0443761	0.899778	0.999938	0.0520905	0.0442751	0.0340359	0.0166078	0.0990978
adenoviridae	Aotus miconax	Primates	Aotidae	FALSE	0	0.44323	0.497494	0.544722	0.43072	2.59569e-15	0.957419	0.446256	0.551295	0.43286	2.71349e-15	0.95904	0.0463233	0.0390768	0.0307059	0.0145679	0.0876134
adenoviridae	Aotus nancymaae	Primates	Aotidae	FALSE	0	0.3347	0.473336	1.15764e-06	0.437736	2.1203e-13	0.967631	0.338845	1.30731e-06	0.442087	2.41512e-13	0.971773	0.122727	0.117703	0.0480798	0.0659115	0.185694
adenoviridae	Aotus nigriceps	Primates	Aotidae	FALSE	0	0.111938	0.312266	1.0568e-13	0.281924	0	0.724412	0.113419	1.10837e-13	0.2852	0	0.742097	0.0751554	0.0647696	0.0483034	0.0248226	0.143049
adenoviridae	Aotus trivirgatus	Primates	Aotidae	FALSE	0	0.943195	0.232034	0.981645	0.0971586	0.806257	0.999888	0.984494	0.994365	0.0254377	0.945644	0.999965	0.66855	0.719314	0.195168	0.384041	0.885363
adenoviridae	Aotus vociferans	Primates	Aotidae	FALSE	0	0.707178	0.45353	0.894889	0.389924	1.11818e-07	0.994202	0.715469	0.905707	0.392556	1.30499e-07	0.995142	0.134808	0.128498	0.0525381	0.0730246	0.204312
adenoviridae	Aotus zonalis	Primates	Aotidae	FALSE	0	0.967421	0.173047	0.990167	0.0680924	0.922284	0.999829	0.969223	0.990944	0.0630126	0.923482	0.999841	0.0635315	0.0547119	0.0410319	0.0209476	0.120895
adenoviridae	Aplodontia rufa	Rodentia	Aplodontiidae	FALSE	0	0.493879	0.499968	0.814118	0.453866	2.62747e-21	0.978192	0.494247	0.815076	0.454166	2.62976e-21	0.978257	0.010529	0.00724235	0.0110898	0.00164987	0.0224906
adenoviridae	Apodemus agrarius	Rodentia	Muridae	TRUE	1	1	0	1	0	1	1	0.9746	0.99263	0.0356187	0.935005	0.999515	0.824011	0.849794	0.118633	0.649985	0.953678
adenoviridae	Apodemus alpicola	Rodentia	Muridae	FALSE	0	0.894684	0.298259	0.918705	0.129335	0.804477	0.991499	0.896242	0.920599	0.128714	0.807292	0.991633	0.0217618	0.0200192	0.00973271	0.0110857	0.0343489
adenoviridae	Apodemus argenteus	Rodentia	Muridae	FALSE	0	0.933025	0.251058	0.949788	0.0615401	0.852805	0.997992	0.93612	0.951492	0.0589967	0.856854	0.998122	0.0532396	0.0486678	0.0222372	0.0296966	0.0825405
adenoviridae	Apodemus chevrieri	Rodentia	Muridae	FALSE	0	0.928565	0.256658	0.984062	0.104516	0.778868	0.999913	0.974696	0.993801	0.0381176	0.932728	0.99997	0.640183	0.638369	0.124677	0.469185	0.802247
adenoviridae	Apodemus draco	Rodentia	Muridae	FALSE	0	0.942994	0.234875	0.964332	0.0610498	0.859081	0.998488	0.963813	0.975677	0.0402009	0.912564	0.998949	0.363932	0.346082	0.121249	0.221627	0.538531
adenoviridae	Apodemus epimelas	Rodentia	Muridae	FALSE	0	0.707701	0.455998	0.816584	0.308863	0.00309201	0.937274	0.709093	0.819122	0.309206	0.00315915	0.937887	0.015135	0.0140092	0.00640525	0.00809937	0.0236412
adenoviridae	Apodemus flavicollis	Rodentia	Muridae	FALSE	1	1	0	1	0	1	1	0.970106	0.987466	0.0438498	0.909399	0.99969	0.807624	0.829539	0.119545	0.633331	0.940816
adenoviridae	Apodemus gurkha	Rodentia	Muridae	FALSE	0	0.803978	0.394264	0.868784	0.234657	0.639525	0.965781	0.805272	0.86987	0.234615	0.642149	0.966275	0.014092	0.0131049	0.00596699	0.00752554	0.0218943
adenoviridae	Apodemus hyrcanicus	Rodentia	Muridae	FALSE	0	0.46356	0.498569	0.653907	0.366675	4.27413e-10	0.854871	0.464782	0.657183	0.367408	4.31502e-10	0.856825	0.0135339	0.0126431	0.00574902	0.00734387	0.0209909
adenoviridae	Apodemus latronum	Rodentia	Muridae	FALSE	0	0.912844	0.281101	0.925398	0.0695528	0.816354	0.992669	0.918065	0.933354	0.0660851	0.826823	0.993569	0.0742254	0.0651077	0.0355304	0.0397879	0.120718
adenoviridae	Apodemus mystacinus	Rodentia	Muridae	FALSE	0	0.743608	0.439939	0.832277	0.27317	0.166648	0.944326	0.748325	0.834427	0.273539	0.174194	0.947197	0.0401254	0.0361677	0.0167696	0.0231199	0.0617199
adenoviridae	Apodemus pallipes	Rodentia	Muridae	FALSE	0	0.777784	0.419218	0.860726	0.253486	0.495571	0.971175	0.782349	0.865619	0.252838	0.507801	0.971847	0.0428376	0.0386366	0.0178555	0.0245766	0.065857
adenoviridae	Apodemus peninsulae	Rodentia	Muridae	FALSE	0	0.897713	0.300133	0.90609	0.0816458	0.787761	0.985656	0.93232	0.93699	0.0557198	0.862727	0.991975	0.366913	0.349372	0.12163	0.223773	0.541123
adenoviridae	Apodemus ponticus	Rodentia	Muridae	FALSE	0	0.802315	0.401789	0.828384	0.188795	0.663155	0.947536	0.806477	0.83433	0.188437	0.672628	0.948831	0.0332723	0.0298077	0.0142243	0.0192917	0.0516339
adenoviridae	Apodemus rusiges	Rodentia	Muridae	FALSE	0	0.677731	0.466322	0.810734	0.336455	0.000347393	0.953431	0.679088	0.81234	0.336787	0.000353828	0.953946	0.0148352	0.0137734	0.00627552	0.00799552	0.0230063
adenoviridae	Apodemus semotus	Rodentia	Muridae	FALSE	0	0.832821	0.369366	0.913279	0.251525	0.567949	0.987074	0.834151	0.914064	0.251447	0.57198	0.987361	0.0210159	0.0193269	0.00933041	0.0107802	0.0331499
adenoviridae	Apodemus speciosus	Rodentia	Muridae	FALSE	0	0.902903	0.298124	0.923258	0.0699536	0.810592	0.990237	0.919044	0.938949	0.0583831	0.83512	0.991459	0.180077	0.161672	0.0816527	0.0974953	0.293453
adenoviridae	Apodemus sylvaticus	Rodentia	Muridae	FALSE	1	1	0	1	0	1	1	0.980206	0.994051	0.0320828	0.943658	0.999994	0.844564	0.874057	0.119735	0.672754	0.975868
adenoviridae	Apodemus uralensis	Rodentia	Muridae	FALSE	0	0.952269	0.213766	0.9648	0.0521992	0.872342	0.999924	0.963787	0.973825	0.0405809	0.916904	0.999949	0.257771	0.236574	0.103515	0.146734	0.404273
adenoviridae	Apodemus witherbyi	Rodentia	Muridae	FALSE	0	0.588582	0.493559	0.759101	0.352899	1.40572e-06	0.89974	0.590918	0.76322	0.353829	1.4845e-06	0.901378	0.0263241	0.0240095	0.0122592	0.01299	0.0419637
adenoviridae	Apomys abrae	Rodentia	Muridae	FALSE	0	2.23927e-05	0	0	0.000192629	0	5.67093e-26	2.27615e-05	0	0.000195802	0	5.72167e-26	0.013574	0.0126845	0.00576428	0.00735931	0.0210324
adenoviridae	Apomys camiguinensis	Rodentia	Muridae	FALSE	0	0.00309671	0.0573508	1.29775e-37	0.0266389	0	1.4369e-12	0.00313518	1.32237e-37	0.0269697	0	1.45793e-12	0.0133491	0.0124846	0.00567975	0.00724983	0.020684
adenoviridae	Apomys datae	Rodentia	Muridae	FALSE	0	0.000841588	0.0244875	0	0.00723961	0	8.33812e-20	0.000854567	0	0.00735125	0	8.45529e-20	0.0135582	0.0126709	0.00575823	0.00735616	0.021017
adenoviridae	Apomys gracilirostris	Rodentia	Muridae	FALSE	0	0.00864924	0.0923366	2.53619e-34	0.0737029	0	1.24652e-08	0.00869902	2.57228e-34	0.0741269	0	1.25197e-08	0.0133731	0.0124977	0.00568864	0.00726171	0.0207143
adenoviridae	Apomys hylocetes	Rodentia	Muridae	FALSE	0	0.00728748	0.0765845	0	0.062689	0	1.49435e-17	0.00734097	0	0.0631492	0	1.51747e-17	0.0134298	0.01254	0.00570981	0.00729165	0.0207797
adenoviridae	Apomys insignis	Rodentia	Muridae	FALSE	0	0.00777223	0.0857044	0	0.066859	0	4.36109e-18	0.00783079	0	0.0673628	0	4.4351e-18	0.015111	0.0139863	0.00639475	0.00809093	0.0236146
adenoviridae	Apomys littoralis	Rodentia	Muridae	FALSE	0	0.0074579	0.0851276	0	0.064155	0	1.30529e-19	0.00751132	0	0.0646146	0	1.32068e-19	0.0134952	0.012603	0.00573439	0.0073243	0.020946
adenoviridae	Apomys microdon	Rodentia	Muridae	FALSE	0	0.0014346	0.033148	0	0.0123409	0	1.061e-22	0.00145703	0	0.0125338	0	1.07696e-22	0.0144946	0.0134721	0.00613171	0.0077686	0.0224644
adenoviridae	Apomys musculus	Rodentia	Muridae	FALSE	0	0.00483973	0.0638998	0	0.0415955	0	5.87596e-17	0.00489311	0	0.0420545	0	5.93093e-17	0.0143849	0.0133465	0.00608625	0.00772079	0.0223145
adenoviridae	Apomys sacobianus	Rodentia	Muridae	FALSE	0	2.04894e-05	0	0	0.000176255	0	5.85892e-26	2.0822e-05	0	0.000179116	0	5.91057e-26	0.0133644	0.0124929	0.00568541	0.00725832	0.0207033
adenoviridae	Aproteles bulmerae	Chiroptera	Pteropodidae	FALSE	0	0.456125	0.497065	0.480743	0.430699	3.8518e-10	0.958371	0.456312	0.480762	0.430801	3.85665e-10	0.958442	0.00279678	0.00198627	0.00271315	0.000382692	0.00630665
adenoviridae	Arabitragus jayakari	Cetartiodactyla	Bovidae	FALSE	0	0.850613	0.357071	0.87712	0.160923	0.760813	0.970237	0.851024	0.877121	0.160889	0.761834	0.970425	0.00568257	0.00315013	0.00715382	0.00040394	0.0143224
adenoviridae	Arborimus albipes	Rodentia	Cricetidae	FALSE	0	0.398551	0.488613	0.604798	0.370316	1.26774e-12	0.801507	0.398939	0.605356	0.370603	1.27173e-12	0.802002	0.0040787	0.00289111	0.00395164	0.000592064	0.00893991
adenoviridae	Arborimus longicaudus	Rodentia	Cricetidae	FALSE	0	0.375377	0.48355	0.425924	0.370587	5.98009e-16	0.815676	0.375741	0.425966	0.370868	6.02824e-16	0.815842	0.0039265	0.00278785	0.00381404	0.000572816	0.00857717
adenoviridae	Arborimus pomo	Rodentia	Cricetidae	FALSE	0	0.438791	0.495731	0.604086	0.400603	5.26907e-20	0.911775	0.439157	0.604964	0.400865	5.29045e-20	0.911991	0.00377211	0.00268973	0.00367687	0.000551726	0.00829127
adenoviridae	Archboldomys luzonensis	Rodentia	Muridae	FALSE	0	6.08643e-09	0	0	5.23575e-08	0	5.83336e-23	6.13145e-09	0	5.27447e-08	0	5.90795e-23	0.0133474	0.0124837	0.00567911	0.00724846	0.0206818
adenoviridae	Arctictis binturong	Carnivora	Viverridae	FALSE	0	0.846577	0.361236	0.903156	0.20932	0.730052	0.992388	0.848124	0.905483	0.208975	0.732222	0.992567	0.0202612	0.0127991	0.0241394	0.00228048	0.0458324
adenoviridae	Arctocebus aureus	Primates	Lorisidae	FALSE	0	0.172664	0.378593	4.10641e-24	0.360628	0	0.955325	0.173339	4.17247e-24	0.361821	0	0.959109	0.035601	0.0260906	0.0312925	0.00551853	0.0747026
adenoviridae	Arctocebus calabarensis	Primates	Lorisidae	FALSE	0	0.123375	0.330037	5.58318e-22	0.315684	0	0.882855	0.123641	5.72096e-22	0.316251	0	0.885549	0.02477	0.0184844	0.0218864	0.00383888	0.0532107
adenoviridae	Arctogalidia trivirgata	Carnivora	Viverridae	FALSE	0	0.783905	0.410684	0.84388	0.227834	0.508067	0.961847	0.78614	0.844728	0.227261	0.510842	0.962038	0.0199992	0.0126174	0.0238376	0.00224901	0.0452536
adenoviridae	Arctonyx albogularis	Carnivora	Mustelidae	FALSE	0	0.877066	0.335311	0.911484	0.147439	0.778944	0.996214	0.878729	0.914192	0.14665	0.779846	0.996256	0.0180339	0.011718	0.0195575	0.0022979	0.0409503
adenoviridae	Arctonyx collaris	Carnivora	Mustelidae	FALSE	0	0.81727	0.382091	0.859939	0.185436	0.661255	0.976778	0.830837	0.874467	0.182152	0.688308	0.979352	0.119204	0.108397	0.0583072	0.0539746	0.195912
adenoviridae	Arctonyx hoevenii	Carnivora	Mustelidae	FALSE	0	0.294269	0.453391	0.00040175	0.394525	8.39043e-27	0.923835	0.294652	0.000401993	0.394854	8.61727e-27	0.924995	0.00913162	0.00600038	0.0100813	0.00105918	0.0204102
adenoviridae	Ardops nichollsi	Chiroptera	Phyllostomidae	FALSE	0	0.0684826	0.257824	5.66952e-30	0.218493	0	0.0233719	0.0685185	5.67122e-30	0.218587	0	0.0233862	0.00238298	0.00174149	0.00218829	0.000384828	0.00531728
adenoviridae	Arielulus circumdatus	Chiroptera	Vespertilionidae	FALSE	0	0.770237	0.417516	0.811367	0.221946	0.589724	0.951955	0.771249	0.812122	0.22179	0.591452	0.952136	0.00792429	0.00701491	0.00486098	0.0028787	0.0142623
adenoviridae	Arielulus cuprosus	Chiroptera	Vespertilionidae	FALSE	0	0.401944	0.490989	0.431589	0.392439	2.07164e-12	0.888759	0.402451	0.432293	0.392783	2.08894e-12	0.889398	0.00574695	0.00496295	0.00373797	0.00198041	0.010881
adenoviridae	Arielulus societatis	Chiroptera	Vespertilionidae	FALSE	0	0.445847	0.497247	0.615978	0.383993	4.93054e-10	0.887477	0.446606	0.617619	0.384466	5.01347e-10	0.88828	0.00784838	0.00694471	0.00481857	0.00285869	0.0141492
adenoviridae	Arielulus torquatus	Chiroptera	Vespertilionidae	FALSE	0	0.837038	0.367992	0.877822	0.170198	0.690321	0.975272	0.837909	0.87871	0.170034	0.692167	0.975393	0.00813944	0.00723803	0.0049821	0.00294732	0.0145942
adenoviridae	Ariteus flavescens	Chiroptera	Phyllostomidae	FALSE	0	0.118234	0.322608	2.25909e-20	0.273115	0	0.658959	0.118294	2.26511e-20	0.273217	0	0.65913	0.0023306	0.00170163	0.00214926	0.000373625	0.0052464
adenoviridae	Artibeus aequatorialis	Chiroptera	Phyllostomidae	FALSE	0	0.768996	0.421982	0.903922	0.322363	0.0192543	0.997286	0.769157	0.9042	0.322375	0.0193464	0.997287	0.00276643	0.00205093	0.00248477	0.000447496	0.006
adenoviridae	Artibeus amplus	Chiroptera	Phyllostomidae	FALSE	0	0.596782	0.49058	0.780898	0.374566	5.59452e-07	0.923569	0.597034	0.781061	0.374679	5.6097e-07	0.923875	0.00387267	0.0029366	0.00340632	0.000631078	0.00855885
adenoviridae	Artibeus concolor	Chiroptera	Phyllostomidae	FALSE	0	0.653429	0.475919	0.787736	0.325269	0.000870983	0.889834	0.653956	0.788661	0.325472	0.000874166	0.890472	0.00567787	0.00434837	0.00499698	0.000922383	0.0125186
adenoviridae	Artibeus fimbriatus	Chiroptera	Phyllostomidae	FALSE	0	0.863337	0.344374	0.877051	0.150869	0.770382	0.993698	0.869375	0.88378	0.148817	0.780898	0.994155	0.0659144	0.062849	0.0213167	0.0410216	0.0934573
adenoviridae	Artibeus fraterculus	Chiroptera	Phyllostomidae	FALSE	0	0.823122	0.379109	0.920207	0.24604	0.622623	0.997004	0.823292	0.920321	0.245998	0.623131	0.997006	0.00250636	0.00183339	0.00228174	0.000402169	0.00555437
adenoviridae	Artibeus hirsutus	Chiroptera	Phyllostomidae	FALSE	0	0.837141	0.369912	0.859657	0.190763	0.727128	0.98177	0.83737	0.859674	0.190749	0.727368	0.981779	0.00276252	0.00204823	0.00248165	0.000446722	0.00599226
adenoviridae	Artibeus inopinatus	Chiroptera	Phyllostomidae	FALSE	0	0.571573	0.494067	0.744517	0.355611	1.07807e-06	0.897076	0.571773	0.745736	0.355694	1.08352e-06	0.897202	0.00241407	0.00176303	0.00221164	0.00039028	0.00537129
adenoviridae	Artibeus jamaicensis	Chiroptera	Phyllostomidae	FALSE	0	0.869034	0.341617	0.928833	0.135016	0.686201	0.9992	0.950003	0.971274	0.0552688	0.875151	0.999605	0.652228	0.66254	0.116999	0.491577	0.794266
adenoviridae	Artibeus lituratus	Chiroptera	Phyllostomidae	TRUE	1	1	0	1	0	1	1	0.979575	0.992803	0.034323	0.95405	0.999843	0.827072	0.851609	0.110555	0.671468	0.951739
adenoviridae	Artibeus obscurus	Chiroptera	Phyllostomidae	TRUE	1	1	0	1	0	1	1	0.97679	0.988177	0.0352824	0.936894	0.999821	0.375847	0.374403	0.0834593	0.270996	0.485873
adenoviridae	Artibeus planirostris	Chiroptera	Phyllostomidae	FALSE	0	0.872116	0.33409	0.933739	0.175368	0.608225	0.999291	0.977053	0.988428	0.0347014	0.936958	0.999813	0.816935	0.841822	0.115184	0.653674	0.948407
adenoviridae	Artibeus schwartzi	Chiroptera	Phyllostomidae	FALSE	0	0.68772	0.462903	0.852114	0.365261	2.10562e-06	0.986675	0.687859	0.852443	0.365295	2.10743e-06	0.986683	0.00228616	0.00166297	0.00211647	0.00036436	0.0051379
adenoviridae	Arvicanthis abyssinicus	Rodentia	Muridae	FALSE	0	0.163569	0.368451	2.22147e-08	0.318701	3.39781e-20	0.798534	0.164048	2.24996e-08	0.319439	3.47052e-20	0.800505	0.0195535	0.0180568	0.00855571	0.0101589	0.0307195
adenoviridae	Arvicanthis ansorgei	Rodentia	Muridae	FALSE	0	0.940909	0.232796	0.960743	0.0878564	0.871403	0.996451	0.941819	0.961364	0.0871053	0.874697	0.996504	0.0207058	0.0190924	0.00916448	0.0106542	0.0326601
adenoviridae	Arvicanthis blicki	Rodentia	Muridae	FALSE	0	0.121257	0.326243	2.44045e-10	0.2765	2.12499e-25	0.726962	0.121572	2.47235e-10	0.277147	2.1512e-25	0.728011	0.0154705	0.0143195	0.00655359	0.00822231	0.0240154
adenoviridae	Arvicanthis nairobae	Rodentia	Muridae	FALSE	0	0.774641	0.416922	0.875129	0.290235	0.206002	0.978979	0.776041	0.876605	0.290062	0.209967	0.979393	0.0179892	0.0165845	0.00775419	0.00939244	0.0277729
adenoviridae	Arvicanthis neumanni	Rodentia	Muridae	FALSE	0	0.445188	0.497086	0.560967	0.417071	1.92478e-08	0.944729	0.448233	0.580772	0.418981	2.03283e-08	0.946298	0.0439006	0.0397667	0.0182896	0.0251256	0.0674125
adenoviridae	Arvicanthis niloticus	Rodentia	Muridae	FALSE	0	0.918063	0.267225	0.962143	0.0980032	0.77799	0.99767	0.9663	0.982484	0.0400631	0.895931	0.998773	0.594462	0.59268	0.124449	0.42995	0.762868
adenoviridae	Arvicanthis rufinus	Rodentia	Muridae	FALSE	0	0.905619	0.297179	0.978606	0.214589	0.839889	0.999158	0.906631	0.978937	0.214265	0.844461	0.999181	0.0276861	0.0252642	0.0130268	0.0136223	0.0442145
adenoviridae	Arvicola scherman	Rodentia	Cricetidae	FALSE	0	0.930414	0.247932	0.950013	0.066569	0.83482	0.997357	0.935674	0.955599	0.061651	0.848208	0.997891	0.086296	0.0690713	0.0602201	0.0317815	0.166057
adenoviridae	Asellia italosomalica	Chiroptera	Hipposideridae	FALSE	0	0.294716	0.459168	5.31628e-05	0.406974	4.09859e-24	0.966758	0.294876	5.33595e-05	0.407131	4.11111e-24	0.966905	0.00389212	0.00278238	0.00398772	0.000559265	0.00868924
adenoviridae	Asellia patrizii	Chiroptera	Hipposideridae	FALSE	0	0.558006	0.496302	0.754238	0.409887	5.31902e-12	0.994077	0.558267	0.754632	0.409981	5.32584e-12	0.994115	0.00467223	0.00327293	0.00478554	0.000678577	0.0106284
adenoviridae	Asellia tridens	Chiroptera	Hipposideridae	FALSE	0	0.527539	0.499069	0.673385	0.404922	1.51674e-08	0.97385	0.528173	0.673489	0.405218	1.51934e-08	0.973926	0.00818009	0.00557078	0.00853183	0.00114235	0.0184469
adenoviridae	Aselliscus stoliczkanus	Chiroptera	Hipposideridae	FALSE	0	0.752566	0.430265	0.81285	0.215074	0.436236	0.987518	0.95301	0.965853	0.0469222	0.886375	0.998031	0.834119	0.85219	0.10844	0.686611	0.954613
adenoviridae	Aselliscus tricuspidatus	Chiroptera	Hipposideridae	FALSE	0	8.37832e-05	0	0	0.000542169	0	1.36717e-13	8.41958e-05	0	0.000545283	0	1.36934e-13	0.00465603	0.00325915	0.00476871	0.000676307	0.0106052
adenoviridae	Atelerix albiventris	Eulipotyphla	Erinaceidae	TRUE	1	1	0	1	0	1	1	0.930023	0.969893	0.0871422	0.810524	0.999922	0.129841	0.0727314	0.144784	0.0168037	0.338926
adenoviridae	Atelerix algirus	Eulipotyphla	Erinaceidae	FALSE	0	0.516128	0.499728	0.753005	0.425079	1.48208e-16	0.966478	0.516803	0.758521	0.425506	1.48984e-16	0.966531	0.011479	0.00657467	0.0138062	0.00110324	0.0260885
adenoviridae	Atelerix frontalis	Eulipotyphla	Erinaceidae	FALSE	0	0.538362	0.498856	0.798846	0.430027	3.01442e-19	0.991175	0.539032	0.801989	0.43034	3.02418e-19	0.991262	0.0110188	0.00628964	0.0132485	0.00105654	0.0250096
adenoviridae	Atelerix sclateri	Eulipotyphla	Erinaceidae	FALSE	0	0.390386	0.485828	0.0256718	0.418986	7.29516e-18	0.932202	0.390997	0.0258142	0.419515	7.31039e-18	0.932637	0.00814048	0.00475746	0.00978695	0.000775406	0.0188025
adenoviridae	Ateles belzebuth	Primates	Atelidae	FALSE	0	0.91027	0.291411	0.964749	0.158876	0.781002	0.99993	0.936024	0.979264	0.141616	0.881281	0.999951	0.35646	0.354963	0.124953	0.197884	0.519406
adenoviridae	Ateles chamek	Primates	Atelidae	FALSE	0	0.97445	0.160026	0.995256	0.0372968	0.923568	0.999934	0.977882	0.995552	0.0318894	0.936152	0.999949	0.125161	0.116455	0.0566414	0.0617376	0.197607
adenoviridae	Ateles fusciceps	Primates	Atelidae	FALSE	0	0.982004	0.142714	0.999084	0.0447189	0.958764	0.999999	0.989606	0.999459	0.02598	0.974381	0.999999	0.361048	0.359699	0.125749	0.201249	0.526081
adenoviridae	Ateles geoffroyi	Primates	Atelidae	FALSE	0	0.954903	0.210134	0.991616	0.0716311	0.859698	0.999765	0.975311	0.995726	0.0376184	0.918426	0.999845	0.394621	0.393372	0.131249	0.226899	0.569055
adenoviridae	Ateles hybridus	Primates	Atelidae	FALSE	0	0.917277	0.279921	0.958778	0.150429	0.824632	0.999752	0.921885	0.960965	0.147933	0.834895	0.999769	0.0742104	0.0681572	0.0347329	0.0353498	0.121455
adenoviridae	Ateles marginatus	Primates	Atelidae	FALSE	0	0.952439	0.209702	0.981413	0.127769	0.902926	0.99998	0.952938	0.981706	0.127622	0.907236	0.999981	0.0217427	0.0157403	0.0207092	0.00366901	0.0463538
adenoviridae	Ateles paniscus	Primates	Atelidae	TRUE	1	1	0	1	0	1	1	0.989842	0.998499	0.0177177	0.964894	0.999999	0.410614	0.41055	0.133619	0.238191	0.589288
adenoviridae	Atelocynus microtis	Carnivora	Canidae	FALSE	0	0.807902	0.395815	0.921062	0.308869	0.00218701	0.999079	0.808938	0.922031	0.308947	0.00219789	0.999099	0.0176163	0.0115037	0.0208006	0.00195611	0.0379969
adenoviridae	Atherurus africanus	Rodentia	Hystricidae	FALSE	0	0.938774	0.229729	0.997417	0.193624	0.917794	0.999998	0.939789	0.997633	0.192951	0.925167	0.999998	0.0471607	0.0386113	0.0317111	0.0162419	0.0879375
adenoviridae	Atherurus macrourus	Rodentia	Hystricidae	FALSE	0	0.875512	0.332187	0.96453	0.257914	0.687948	0.999581	0.877671	0.965297	0.257084	0.706998	0.99961	0.0463615	0.0380621	0.0311912	0.0159274	0.0864872
adenoviridae	Atlantoxerus getulus	Rodentia	Sciuridae	FALSE	0	0.291588	0.452831	1.45954e-05	0.405077	2.9785e-21	0.897073	0.291774	1.47245e-05	0.405305	3.0087e-21	0.898163	0.00584986	0.00449507	0.005186	0.000991436	0.0122889
adenoviridae	Atopogale cubana	Eulipotyphla	Solenodontidae	FALSE	0	0.187787	0.390072	2.14932e-18	0.350895	0	0.860405	0.188038	2.14992e-18	0.351297	0	0.862222	0.00656114	0.00384288	0.00833483	0.000606325	0.0160142
adenoviridae	Auliscomys boliviensis	Rodentia	Cricetidae	FALSE	0	0.00228135	0.0479031	1.26238e-25	0.0110903	0	2.29928e-07	0.00228994	1.27048e-25	0.0111418	0	2.31322e-07	0.0041247	0.00291783	0.00399366	0.000598233	0.00901442
adenoviridae	Auliscomys pictus	Rodentia	Cricetidae	FALSE	0	0.00881741	0.0933946	2.69882e-25	0.0565452	0	2.25003e-10	0.00882858	2.7187e-25	0.0565961	0	2.25183e-10	0.00434382	0.00302414	0.0041962	0.000626979	0.00944422
adenoviridae	Auliscomys sublimis	Rodentia	Cricetidae	FALSE	0	8.83559e-05	0.0099995	1.24203e-28	0.000588092	0	4.41553e-11	8.87671e-05	1.2631e-28	0.000590524	0	4.43453e-11	0.00449713	0.00312548	0.00434009	0.000650853	0.00973728
adenoviridae	Austronomus australis	Chiroptera	Molossidae	FALSE	0	0.714847	0.449487	0.901785	0.383343	2.44596e-08	0.989161	0.715218	0.902613	0.383479	2.45016e-08	0.989233	0.00643033	0.00452425	0.00659212	0.000875577	0.0142254
adenoviridae	Austronomus kuboriensis	Chiroptera	Molossidae	FALSE	0	0.0133381	0.121552	0	0.114697	0	2.20667e-10	0.0133382	0	0.114697	0	2.21296e-10	0.00323896	0.00231386	0.00331814	0.000444514	0.00705893
adenoviridae	Avahi betsileo	Primates	Indriidae	FALSE	0	0.814834	0.385101	0.937124	0.305931	0.170912	0.998254	0.815868	0.938642	0.305735	0.172214	0.998259	0.0211101	0.0151549	0.020235	0.00316337	0.0454337
adenoviridae	Avahi cleesei	Primates	Indriidae	FALSE	0	0.664474	0.472339	0.915307	0.421443	2.20676e-09	0.99749	0.66533	0.915691	0.421793	2.26288e-09	0.997513	0.0209336	0.0150445	0.0200611	0.00313411	0.0449902
adenoviridae	Avahi laniger	Primates	Indriidae	TRUE	1	1	0	1	0	1	1	0.980132	0.997407	0.0375328	0.943096	0.999966	0.214248	0.207238	0.0720112	0.128767	0.30608
adenoviridae	Avahi meridionalis	Primates	Indriidae	FALSE	0	0.34758	0.478544	0.00175181	0.43364	2.14189e-17	0.978731	0.348289	0.00177744	0.434201	2.1729e-17	0.978881	0.0208924	0.0150048	0.0200206	0.00312642	0.0448935
adenoviridae	Avahi mooreorum	Primates	Indriidae	FALSE	0	0.520929	0.499676	0.78045	0.459113	1.88227e-10	0.997779	0.521732	0.784013	0.459495	1.89031e-10	0.997786	0.0219837	0.015835	0.0211027	0.00329181	0.0472984
adenoviridae	Avahi occidentalis	Primates	Indriidae	FALSE	0	0.556429	0.49733	0.858731	0.469875	4.86965e-08	0.999933	0.557122	0.85958	0.470177	4.94124e-08	0.999934	0.0216516	0.0155771	0.0207715	0.00324043	0.0467713
adenoviridae	Avahi peyrierasi	Primates	Indriidae	FALSE	0	0.826421	0.383352	0.952472	0.295402	0.234333	0.99924	0.827552	0.958464	0.295305	0.236134	0.999253	0.023697	0.0167694	0.0228301	0.00354703	0.0511921
adenoviridae	Avahi ramanantsoavanai	Primates	Indriidae	FALSE	0	0.263701	0.437202	1.41032e-06	0.401971	1.3553e-24	0.949698	0.264169	1.43107e-06	0.402588	1.3899e-24	0.953626	0.0212148	0.015235	0.0203383	0.003178	0.0456802
adenoviridae	Avahi unicolor	Primates	Indriidae	FALSE	0	0.45261	0.498148	0.00965547	0.475936	3.9325e-14	0.999853	0.453145	0.00979367	0.476254	4.05291e-14	0.999861	0.0208953	0.0150075	0.0200234	0.00312695	0.0449002
adenoviridae	Axis axis	Cetartiodactyla	Cervidae	FALSE	0	0.836707	0.367899	0.887064	0.177993	0.602936	0.996403	0.934356	0.958456	0.0788637	0.840202	0.998734	0.595108	0.593298	0.173272	0.370402	0.827223
adenoviridae	Axis calamianensis	Cetartiodactyla	Cervidae	FALSE	0	0.288747	0.455138	3.62901e-06	0.403323	1.51246e-29	0.942096	0.289091	3.6312e-06	0.403651	1.5261e-29	0.942834	0.00602824	0.00325669	0.0077654	0.000460837	0.0144095
adenoviridae	Axis kuhlii	Cetartiodactyla	Cervidae	FALSE	0	0.180371	0.382429	1.40628e-14	0.346762	3.74004e-38	0.87688	0.180499	1.40801e-14	0.346972	3.74335e-38	0.878235	0.00602461	0.00325448	0.00776097	0.000460563	0.0144081
adenoviridae	Baeodon alleni	Chiroptera	Vespertilionidae	FALSE	0	0.529091	0.49952	0.728629	0.396246	5.55366e-06	0.951723	0.529757	0.73087	0.396514	5.62057e-06	0.951983	0.00720334	0.00635962	0.00446596	0.00261725	0.0131295
adenoviridae	Baeodon gracilis	Chiroptera	Vespertilionidae	FALSE	0	0.518169	0.499221	0.718718	0.394484	4.32609e-07	0.936062	0.518808	0.72001	0.394805	4.38236e-07	0.93655	0.00713598	0.00628878	0.00443002	0.00258568	0.0130194
adenoviridae	Baiomys musculus	Rodentia	Cricetidae	FALSE	0	0.445545	0.496999	0.693936	0.392219	2.0031e-09	0.854708	0.447139	0.695332	0.393349	2.11518e-09	0.85678	0.0204923	0.0159157	0.015467	0.00725234	0.0385188
adenoviridae	Baiomys taylori	Rodentia	Cricetidae	FALSE	0	0.891245	0.308604	0.960054	0.203544	0.718994	0.999482	0.900392	0.963733	0.19794	0.771462	0.999518	0.108273	0.0888629	0.0729393	0.0406998	0.200518
adenoviridae	Balantiopteryx infusca	Chiroptera	Emballonuridae	FALSE	0	0.250138	0.431968	9.16065e-06	0.384297	9.04944e-22	0.903639	0.250266	9.165e-06	0.384472	9.1016e-22	0.9042	0.0033775	0.00222485	0.00358475	0.000454349	0.00742249
adenoviridae	Balantiopteryx io	Chiroptera	Emballonuridae	FALSE	0	0.310301	0.462411	0.000121551	0.406327	1.22223e-18	0.902248	0.310558	0.000122339	0.406627	1.22355e-18	0.902728	0.00413959	0.0028316	0.00432346	0.000550383	0.00929416
adenoviridae	Balantiopteryx plicata	Chiroptera	Emballonuridae	FALSE	0	0.576955	0.494479	0.811044	0.427719	1.99582e-09	0.979417	0.577371	0.811722	0.427898	1.99922e-09	0.979561	0.00584239	0.0040543	0.00608295	0.000728953	0.0132503
adenoviridae	Balionycteris maculata	Chiroptera	Pteropodidae	FALSE	0	0.644517	0.478087	0.753961	0.329243	0.000109843	0.940331	0.651891	0.765052	0.330948	0.000115422	0.942371	0.0542117	0.0525582	0.0168981	0.0344619	0.0754889
adenoviridae	Balionycteris seimundi	Chiroptera	Pteropodidae	FALSE	0	0.651761	0.478695	0.791	0.344803	5.94574e-06	0.970732	0.65225	0.791155	0.344931	5.98292e-06	0.970821	0.00427716	0.00303771	0.00416123	0.000609395	0.00967412
adenoviridae	Bandicota bengalensis	Rodentia	Muridae	TRUE	1	1	0	1	0	1	1	0.980973	0.998357	0.031987	0.924957	1	0.293075	0.270896	0.111234	0.168843	0.449328
adenoviridae	Bandicota indica	Rodentia	Muridae	TRUE	1	1	0	1	0	1	1	0.978158	0.983232	0.0247081	0.952829	0.999677	0.774402	0.791299	0.113856	0.617709	0.908423
adenoviridae	Bandicota savilei	Rodentia	Muridae	FALSE	0	0.881722	0.326127	0.928326	0.144103	0.750803	0.991372	0.92852	0.963423	0.104929	0.832982	0.994796	0.45068	0.436593	0.126238	0.301364	0.620959
adenoviridae	Barbastella barbastellus	Chiroptera	Vespertilionidae	FALSE	0	0.964178	0.18251	0.986564	0.0495847	0.885034	0.999821	0.978912	0.993903	0.0295347	0.933083	0.999901	0.427635	0.425138	0.0624087	0.3509	0.504947
adenoviridae	Barbastella darjelingensis	Chiroptera	Vespertilionidae	FALSE	0	0.698373	0.459812	0.790787	0.298319	0.0020092	0.929594	0.700192	0.79294	0.298671	0.00203084	0.930361	0.0143093	0.0126657	0.00875979	0.00495824	0.0248982
adenoviridae	Barbastella leucomelas	Chiroptera	Vespertilionidae	FALSE	0	0.546609	0.498731	0.731125	0.370707	8.5148e-07	0.902485	0.548151	0.734281	0.371348	8.82172e-07	0.903538	0.0143613	0.0126875	0.00879285	0.00496955	0.024998
adenoviridae	Bassaricyon alleni	Carnivora	Procyonidae	FALSE	0	0.695998	0.45353	0.893411	0.391215	3.88075e-08	0.99748	0.697292	0.893982	0.391524	3.97019e-08	0.997508	0.0199152	0.0123275	0.0224485	0.00204365	0.0463679
adenoviridae	Bassaricyon gabbii	Carnivora	Procyonidae	FALSE	0	0.391788	0.489234	0.00514715	0.438805	2.5458e-14	0.969411	0.395434	0.00555795	0.44165	2.70062e-14	0.972283	0.0847556	0.0788253	0.0446374	0.0349479	0.142834
adenoviridae	Bassariscus astutus	Carnivora	Procyonidae	FALSE	0	0.971053	0.166679	0.993232	0.0450887	0.909307	0.999997	0.978434	0.993898	0.0350459	0.938832	0.999998	0.255897	0.242376	0.113696	0.120944	0.404393
adenoviridae	Bassariscus sumichrasti	Carnivora	Procyonidae	FALSE	0	0.615162	0.486022	0.837874	0.415448	1.64211e-09	0.981612	0.616303	0.838424	0.41574	1.66061e-09	0.98178	0.0141498	0.00891928	0.0159468	0.00144567	0.0330154
adenoviridae	Bathyergus janetta	Rodentia	Bathyergidae	FALSE	0	0.041008	0.203756	7.4449e-37	0.177559	0	3.33018e-07	0.0410263	7.8156e-37	0.177624	0	3.40746e-07	0.00766543	0.00547008	0.00764117	0.00118611	0.0166342
adenoviridae	Bathyergus suillus	Rodentia	Bathyergidae	FALSE	0	0.0658895	0.246526	1.23359e-27	0.224099	0	0.00166026	0.0659173	1.23516e-27	0.224154	0	0.00166719	0.00860384	0.00615766	0.00858928	0.00135066	0.018451
adenoviridae	Batomys dentatus	Rodentia	Muridae	FALSE	0	6.37024e-05	0.0099995	0	0.000547906	0	5.58411e-13	6.47322e-05	0	0.000556764	0	5.64475e-13	0.0133553	0.012488	0.00568204	0.00725437	0.0206918
adenoviridae	Batomys granti	Rodentia	Muridae	FALSE	0	8.708e-05	0.0141407	0	0.000747838	0	5.4768e-16	8.84922e-05	0	0.000759981	0	5.53201e-16	0.013442	0.0125516	0.00571437	0.00729754	0.0208029
adenoviridae	Batomys russatus	Rodentia	Muridae	FALSE	0	0.00133128	0.039968	1.30468e-33	0.0113894	0	2.79861e-09	0.00134015	1.32479e-33	0.0114653	0	2.81992e-09	0.0133587	0.0124898	0.00568329	0.00725624	0.0206961
adenoviridae	Batomys salomonseni	Rodentia	Muridae	FALSE	0	0.0538854	0.224033	1.39184e-10	0.164887	2.9566e-26	0.143888	0.0541219	1.40514e-10	0.165513	3.00274e-26	0.144497	0.013706	0.0128168	0.0058149	0.00738581	0.0213378
adenoviridae	Batomys uragon	Rodentia	Muridae	FALSE	0	0.0030127	0.0615269	3.22445e-24	0.0158657	0	8.3148e-08	0.00303432	3.24961e-24	0.0159577	0	8.43808e-08	0.0133482	0.0124841	0.00567942	0.00724912	0.0206829
adenoviridae	Bauerus dubiaquercus	Chiroptera	Vespertilionidae	FALSE	0	0.564418	0.495848	0.83373	0.430445	1.50297e-06	0.987766	0.567637	0.846113	0.431696	1.61691e-06	0.988183	0.0525226	0.0506731	0.0144398	0.0358006	0.071579
adenoviridae	Bdeogale crassicauda	Carnivora	Herpestidae	FALSE	0	0.219321	0.416524	2.68315e-13	0.392211	0	0.95465	0.21953	2.68391e-13	0.392553	0	0.954891	0.0141755	0.00873261	0.0164216	0.0015444	0.0327237
adenoviridae	Bdeogale jacksoni	Carnivora	Herpestidae	FALSE	0	0.509289	0.499919	0.772507	0.44818	1.13434e-14	0.997707	0.509851	0.773662	0.448516	1.15098e-14	0.997709	0.00896955	0.00548334	0.0102095	0.000950308	0.0203727
adenoviridae	Bdeogale nigripes	Carnivora	Herpestidae	FALSE	0	0.172826	0.38352	3.94534e-09	0.336826	4.23295e-35	0.830501	0.173285	3.98911e-09	0.337258	4.31625e-35	0.832079	0.0189231	0.011822	0.0220511	0.00206158	0.0435419
adenoviridae	Bdeogale omnivora	Carnivora	Herpestidae	FALSE	0	0.208168	0.405372	6.50744e-15	0.386123	0	0.941053	0.208355	6.55159e-15	0.386423	0	0.941654	0.00810395	0.00496621	0.00920752	0.000859208	0.0187751
adenoviridae	Beamys hindei	Rodentia	Nesomyidae	FALSE	0	0.719535	0.450167	0.850387	0.332045	0.00144276	0.970156	0.720441	0.852379	0.33219	0.00145059	0.970333	0.0101936	0.00767076	0.00903176	0.00186726	0.0220976
adenoviridae	Beatragus hunteri	Cetartiodactyla	Bovidae	FALSE	0	0.925745	0.264998	0.957421	0.123956	0.832236	0.996295	0.926826	0.958204	0.123427	0.834258	0.996338	0.021031	0.0143892	0.0210035	0.00415573	0.0471545
adenoviridae	Belomys pearsonii	Rodentia	Sciuridae	FALSE	0	0.160046	0.366142	8.48689e-08	0.322211	2.88027e-23	0.852042	0.16025	8.50624e-08	0.322521	2.92695e-23	0.852524	0.00618316	0.00475209	0.00548522	0.00104718	0.0132332
adenoviridae	Berylmys berdmorei	Rodentia	Muridae	FALSE	0	0.903521	0.300666	0.921496	0.112916	0.81454	0.985387	0.905266	0.922979	0.111858	0.81946	0.985869	0.0252398	0.0230084	0.0116514	0.0125234	0.0401555
adenoviridae	Berylmys bowersi	Rodentia	Muridae	FALSE	0	0.919908	0.271911	0.952914	0.107387	0.832426	0.998622	0.93435	0.960168	0.093106	0.85702	0.998947	0.208559	0.187496	0.0904047	0.114515	0.339161
adenoviridae	Berylmys mackenziei	Rodentia	Muridae	FALSE	0	0.868986	0.339467	0.913435	0.18676	0.762817	0.989824	0.870143	0.914681	0.186552	0.767019	0.989926	0.0165828	0.0153847	0.00706692	0.00874153	0.025778
adenoviridae	Berylmys manipulus	Rodentia	Muridae	FALSE	0	0.907236	0.292523	0.922363	0.0744173	0.837757	0.970903	0.90843	0.923621	0.0737206	0.839744	0.971332	0.0173985	0.0160832	0.00746106	0.00913651	0.026972
adenoviridae	Bettongia gaimardi	Diprotodontia	Potoroidae	FALSE	0	0.453626	0.49819	0.147332	0.458364	2.1024e-18	0.991828	0.454044	0.147506	0.458671	2.12223e-18	0.991987	0.0200271	0.0103376	0.0273796	0.00193449	0.0489087
adenoviridae	Bettongia lesueur	Diprotodontia	Potoroidae	FALSE	0	0.586007	0.491085	0.828956	0.429791	2.636e-11	0.999821	0.586227	0.830701	0.42991	2.64187e-11	0.999821	0.00692276	0.00344304	0.00959034	0.000438607	0.0168135
adenoviridae	Bettongia penicillata	Diprotodontia	Potoroidae	FALSE	0	0.754068	0.426105	0.854071	0.313683	2.71064e-05	0.992863	0.754781	0.854941	0.313852	2.72003e-05	0.993065	0.0154547	0.00805235	0.0214501	0.00147648	0.0383776
adenoviridae	Bettongia tropica	Diprotodontia	Potoroidae	FALSE	0	0.437328	0.496706	0.0437246	0.458224	3.69969e-24	0.996642	0.437511	0.0437301	0.458357	3.75127e-24	0.996643	0.00653454	0.00321069	0.00910433	0.000408164	0.0157968
adenoviridae	Bibimys chacoensis	Rodentia	Cricetidae	FALSE	0	0.533934	0.498836	0.727507	0.37774	1.02074e-08	0.912572	0.535486	0.731207	0.378501	1.03025e-08	0.913166	0.0140736	0.0110009	0.011578	0.00465582	0.0261414
adenoviridae	Bibimys labiosus	Rodentia	Cricetidae	FALSE	0	0.540619	0.498546	0.753886	0.375654	8.20503e-09	0.933677	0.541133	0.754379	0.375909	8.34943e-09	0.933898	0.00515649	0.00357941	0.00497494	0.000734261	0.0111009
adenoviridae	Bibimys torresi	Rodentia	Cricetidae	FALSE	0	0.136897	0.346779	4.4781e-11	0.312656	8.83057e-26	0.819196	0.137001	4.49385e-11	0.312852	8.86554e-26	0.819574	0.00363971	0.00259095	0.00356138	0.00053194	0.00801397
adenoviridae	Bison bison	Cetartiodactyla	Bovidae	FALSE	0	0.919039	0.276335	0.980776	0.137479	0.695213	0.999919	0.970814	0.991898	0.0438607	0.921094	0.999966	0.541035	0.578988	0.28933	0.12697	0.911356
adenoviridae	Bison bonasus	Cetartiodactyla	Bovidae	FALSE	0	0.958732	0.203307	0.987788	0.0642862	0.877814	0.999976	0.976122	0.992435	0.0384787	0.929401	0.999981	0.369202	0.351628	0.224548	0.0830584	0.682665
adenoviridae	Biswamoyopterus biswasi	Rodentia	Sciuridae	FALSE	0	0.0522154	0.220812	2.29724e-19	0.201255	0	0.000192737	0.0522487	2.30738e-19	0.201343	0	0.000193834	0.00397584	0.00308359	0.00361102	0.000675451	0.00844394
adenoviridae	Blanfordimys afghanus	Rodentia	Cricetidae	FALSE	0	0.0761639	0.269426	3.11312e-21	0.251875	0	0.000798664	0.0762054	3.11931e-21	0.251998	0	0.000803553	0.00468321	0.00324375	0.00451683	0.000680957	0.0100306
adenoviridae	Blanfordimys bucharensis	Rodentia	Cricetidae	FALSE	0	0.452858	0.497662	0.674556	0.366247	3.30105e-11	0.837069	0.453269	0.675919	0.366528	3.31236e-11	0.837978	0.00388091	0.00275781	0.00377327	0.000568517	0.00848311
adenoviridae	Blarina brevicauda	Eulipotyphla	Soricidae	FALSE	0	0.426858	0.494861	0.573784	0.387332	1.89654e-11	0.9009	0.428282	0.57707	0.38828	1.90389e-11	0.901139	0.0122265	0.00828802	0.0138973	0.0026434	0.0252966
adenoviridae	Blarina carolinensis	Eulipotyphla	Soricidae	FALSE	0	0.265004	0.443022	5.18846e-05	0.345539	1.36983e-15	0.76791	0.265542	5.2479e-05	0.346137	1.42192e-15	0.768859	0.0091314	0.00614144	0.0104263	0.00200388	0.018757
adenoviridae	Blarina hylophaga	Eulipotyphla	Soricidae	FALSE	0	0.191541	0.395429	7.25538e-05	0.305426	4.14794e-18	0.706854	0.192085	7.48216e-05	0.306042	4.19473e-18	0.70879	0.00796719	0.00523847	0.0091333	0.00177075	0.0161601
adenoviridae	Blarinella griselda	Eulipotyphla	Soricidae	FALSE	0	0.699707	0.454865	0.766424	0.238643	0.425493	0.869531	0.701441	0.770369	0.239016	0.427039	0.871655	0.0104945	0.00703476	0.011954	0.0022638	0.0214837
adenoviridae	Blarinella quadraticauda	Eulipotyphla	Soricidae	FALSE	0	0.71267	0.453251	0.776451	0.255653	0.201688	0.920255	0.713441	0.778794	0.255785	0.202082	0.920782	0.00562574	0.00417845	0.00561469	0.00124649	0.0113248
adenoviridae	Blarinella wardi	Eulipotyphla	Soricidae	FALSE	0	0.651052	0.476463	0.735831	0.244076	0.185559	0.812611	0.652034	0.738806	0.244271	0.186896	0.813462	0.00576247	0.00428378	0.0057437	0.00127765	0.0115401
adenoviridae	Blarinomys breviceps	Rodentia	Cricetidae	FALSE	0	0.227052	0.414381	7.76915e-06	0.367859	1.01624e-23	0.838299	0.227276	7.80588e-06	0.368169	1.02262e-23	0.838677	0.00600812	0.00419216	0.00582168	0.000855518	0.0130986
adenoviridae	Boneia bidens	Chiroptera	Pteropodidae	FALSE	0	0.431523	0.495132	0.532318	0.406447	7.99182e-11	0.909602	0.431861	0.532599	0.406642	8.0221e-11	0.909739	0.00443141	0.0031425	0.00431843	0.000626856	0.0100295
adenoviridae	Bos gaurus	Cetartiodactyla	Bovidae	FALSE	0	0.88251	0.319624	0.927918	0.194878	0.805657	0.999923	0.89471	0.939708	0.192686	0.826885	0.999927	0.135116	0.0942396	0.117569	0.0268079	0.294111
adenoviridae	Bos javanicus	Cetartiodactyla	Bovidae	FALSE	0	0.878016	0.326476	0.962565	0.235922	0.789341	0.99921	0.881072	0.963581	0.235799	0.796987	0.999233	0.0516766	0.03363	0.0520164	0.00952891	0.120036
adenoviridae	Bos mutus	Cetartiodactyla	Bovidae	FALSE	0	0.918481	0.271911	0.967743	0.138322	0.800813	0.999768	0.937243	0.974134	0.126138	0.853826	0.999851	0.260284	0.225634	0.179661	0.0555569	0.51633
adenoviridae	Boselaphus tragocamelus	Cetartiodactyla	Bovidae	FALSE	0	0.88742	0.318418	0.939969	0.165698	0.770779	0.997794	0.909513	0.961267	0.160335	0.833594	0.99825	0.283916	0.245326	0.1897	0.0664435	0.548221
adenoviridae	Brachiones przewalskii	Rodentia	Muridae	FALSE	0	0.538457	0.498381	0.714709	0.355292	2.88972e-08	0.903123	0.540202	0.716269	0.356053	2.92943e-08	0.904103	0.0171523	0.0159225	0.00734074	0.00901894	0.0265153
adenoviridae	Brachylagus idahoensis	Lagomorpha	Leporidae	FALSE	0	0.943626	0.235062	0.995803	0.132125	0.83331	0.999998	0.944832	0.995817	0.131312	0.8405	0.999998	0.0275254	0.0128497	0.0414014	0.0025072	0.0648647
adenoviridae	Brachyphylla cavernarum	Chiroptera	Phyllostomidae	FALSE	0	0.120865	0.321062	1.08341e-19	0.283204	0	0.671138	0.120915	1.08463e-19	0.28331	0	0.671419	0.00244373	0.00178036	0.00223405	0.000394231	0.00545233
adenoviridae	Brachyphylla nana	Chiroptera	Phyllostomidae	FALSE	0	0.168965	0.371541	4.71987e-13	0.33058	0	0.774835	0.169038	4.73168e-13	0.330694	0	0.775143	0.00333834	0.00249089	0.00295232	0.000546216	0.00741179
adenoviridae	Brachytarsomys albicauda	Rodentia	Nesomyidae	FALSE	0	0.170672	0.377901	5.24264e-09	0.34855	4.78257e-26	0.92356	0.170854	5.34061e-09	0.348861	4.83003e-26	0.924662	0.0116823	0.0086494	0.0103608	0.00216472	0.0254768
adenoviridae	Brachytarsomys villosa	Rodentia	Nesomyidae	FALSE	0	0.148171	0.353006	2.73693e-12	0.330071	1.31198e-30	0.887083	0.148297	2.76255e-12	0.330295	1.33167e-30	0.887835	0.00791847	0.00617022	0.00707585	0.00151402	0.0168256
adenoviridae	Brachyteles arachnoides	Primates	Atelidae	FALSE	0	0.895291	0.304871	0.913776	0.12578	0.805667	0.996271	0.907717	0.926337	0.12151	0.830259	0.996881	0.137419	0.128345	0.0603817	0.0677868	0.218674
adenoviridae	Brachyteles hypoxanthus	Primates	Atelidae	FALSE	0	0.905716	0.292107	0.930788	0.121858	0.826091	0.996309	0.906977	0.931621	0.12148	0.829083	0.996543	0.0203199	0.0148726	0.01947	0.00343758	0.0439712
adenoviridae	Brachyuromys betsileoensis	Rodentia	Nesomyidae	FALSE	0	0.161736	0.364366	1.68675e-08	0.343006	3.0714e-23	0.896721	0.161871	1.69986e-08	0.343261	3.08895e-23	0.897663	0.0102999	0.00774613	0.00912577	0.00189597	0.0222675
adenoviridae	Brachyuromys ramirohitra	Rodentia	Nesomyidae	FALSE	0	0.15944	0.368634	1.04118e-08	0.339473	4.22566e-24	0.897648	0.159606	1.05643e-08	0.339782	4.24773e-24	0.89875	0.0117231	0.00868112	0.0103976	0.00217405	0.0255781
adenoviridae	Bradypus pygmaeus	Pilosa	Bradypodidae	FALSE	0	0.374527	0.485901	2.24911e-06	0.459567	1.3444e-33	0.999715	0.374765	2.25104e-06	0.459769	1.34619e-33	0.999715	0.00804245	0.00446289	0.0103282	0.000550695	0.0203364
adenoviridae	Bradypus torquatus	Pilosa	Bradypodidae	FALSE	0	0.316004	0.462903	5.71625e-07	0.437776	0	0.994877	0.316305	5.76947e-07	0.438082	0	0.994883	0.0106909	0.00587886	0.0135549	0.000741803	0.0270259
adenoviridae	Bradypus tridactylus	Pilosa	Bradypodidae	FALSE	0	0.830755	0.376771	0.987209	0.333294	0.000538335	1	0.833998	0.987331	0.332763	0.000546102	1	0.0506026	0.0191747	0.0863545	0.00284155	0.128071
adenoviridae	Bradypus variegatus	Pilosa	Bradypodidae	FALSE	0	0.897267	0.302517	0.986134	0.248597	0.800925	0.999993	0.903632	0.988552	0.24628	0.847783	0.999993	0.116383	0.0456634	0.164687	0.00591037	0.356329
adenoviridae	Brassomys albidens	Rodentia	Muridae	FALSE	0	0.010722	0.0928672	0	0.0922277	0	6.24608e-12	0.0107415	0	0.0923955	0	6.32842e-12	0.0133476	0.0124838	0.00567918	0.00724861	0.020682
adenoviridae	Brucepattersonius griserufescens	Rodentia	Cricetidae	FALSE	0	0.376503	0.483179	0.184381	0.38311	2.91453e-12	0.848412	0.376814	0.185045	0.383362	2.9339e-12	0.848962	0.00397063	0.00281798	0.00385371	0.000578001	0.00870865
adenoviridae	Brucepattersonius guarani	Rodentia	Cricetidae	FALSE	0	0.425564	0.494628	0.520193	0.376686	5.35138e-10	0.880853	0.425923	0.520247	0.376919	5.37099e-10	0.881248	0.00371169	0.00264843	0.00362391	0.000543783	0.00816556
adenoviridae	Brucepattersonius igniventris	Rodentia	Cricetidae	FALSE	0	0.435372	0.496483	0.627145	0.372453	3.2185e-10	0.832996	0.435738	0.628101	0.372717	3.2302e-10	0.833353	0.00375105	0.00267737	0.00365835	0.000548956	0.00824744
adenoviridae	Brucepattersonius iheringi	Rodentia	Cricetidae	FALSE	0	0.504123	0.499995	0.662315	0.399453	1.75213e-08	0.931199	0.504496	0.663925	0.39962	1.76235e-08	0.931487	0.00428089	0.00298806	0.00413764	0.000618687	0.00930121
adenoviridae	Brucepattersonius misionensis	Rodentia	Cricetidae	FALSE	0	0.48317	0.49996	0.664268	0.379204	7.25027e-10	0.899465	0.483541	0.665654	0.379405	7.27605e-10	0.899678	0.00370515	0.00264254	0.0036182	0.000542923	0.00815273
adenoviridae	Brucepattersonius paradisus	Rodentia	Cricetidae	FALSE	0	0.497268	0.499972	0.703887	0.379656	9.28095e-10	0.900507	0.497641	0.705186	0.37985	9.32109e-10	0.900702	0.0037308	0.00266549	0.00364061	0.000546295	0.00820532
adenoviridae	Brucepattersonius soricinus	Rodentia	Cricetidae	FALSE	0	0.403877	0.489297	0.528182	0.365435	3.82121e-11	0.828103	0.404302	0.528589	0.365721	3.85495e-11	0.828527	0.00438517	0.00304978	0.00423485	0.00063243	0.009524
adenoviridae	Bubalus depressicornis	Cetartiodactyla	Bovidae	FALSE	0	0.694856	0.462903	0.891634	0.397103	2.28367e-08	0.994221	0.695181	0.891773	0.397184	2.31431e-08	0.994288	0.00798759	0.00435167	0.00999816	0.000590082	0.019627
adenoviridae	Bubalus mindorensis	Cetartiodactyla	Bovidae	FALSE	0	0.356955	0.480579	4.38381e-07	0.451297	1.30456e-33	0.999224	0.357073	4.39212e-07	0.451389	1.31198e-33	0.999224	0.0055693	0.00308796	0.00701873	0.000397732	0.0140587
adenoviridae	Bubalus quarlesi	Cetartiodactyla	Bovidae	FALSE	0	0.692301	0.459298	0.91111	0.406879	2.0996e-08	0.994573	0.692541	0.912225	0.40697	2.10533e-08	0.994584	0.00740862	0.00406856	0.00927184	0.000548971	0.0181814
adenoviridae	Budorcas taxicolor	Cetartiodactyla	Bovidae	FALSE	0	0.883379	0.319263	0.927897	0.141711	0.775979	0.993345	0.899034	0.940925	0.130941	0.795288	0.993665	0.13587	0.0949311	0.118079	0.0269726	0.295928
adenoviridae	Bullimus bagobus	Rodentia	Muridae	FALSE	0	0.0011068	0.033148	7.10925e-35	0.00839061	0	8.36678e-09	0.00112374	7.20195e-35	0.00852652	0	8.4124e-09	0.0145843	0.0135542	0.00616919	0.00780795	0.022595
adenoviridae	Bullimus gamay	Rodentia	Muridae	FALSE	0	0.0104191	0.100479	7.41157e-30	0.0893819	0	7.04937e-08	0.0104364	7.45184e-30	0.0895269	0	7.14875e-08	0.0133483	0.0124841	0.00567944	0.00724917	0.0206829
adenoviridae	Bullimus luzonicus	Rodentia	Muridae	FALSE	0	1.96288e-05	0	0	0.000133559	0	2.31287e-16	1.99188e-05	0	0.000135721	0	2.34699e-16	0.0140444	0.0130807	0.00594791	0.0075161	0.0218269
adenoviridae	Bunolagus monticularis	Lagomorpha	Leporidae	FALSE	0	0.0790595	0.271603	0	0.236139	0	0.225633	0.0791403	0	0.236352	0	0.225842	0.00579991	0.00322927	0.00748077	0.000552453	0.0148098
adenoviridae	Bunomys andrewsi	Rodentia	Muridae	FALSE	0	0.162955	0.361427	8.9465e-06	0.260564	2.78831e-14	0.608	0.163923	9.09458e-06	0.261804	2.84545e-14	0.612261	0.0199344	0.0184143	0.00875546	0.0103311	0.0313721
adenoviridae	Bunomys chrysocomus	Rodentia	Muridae	FALSE	0	0.135738	0.344795	7.98284e-06	0.234166	5.08596e-15	0.525898	0.136662	8.20253e-06	0.23537	5.1956e-15	0.528946	0.0217297	0.0199831	0.00971536	0.0110724	0.0342962
adenoviridae	Bunomys coelestis	Rodentia	Muridae	FALSE	0	0.103414	0.305779	1.42054e-07	0.205417	1.20164e-17	0.45209	0.103914	1.4416e-07	0.206229	1.21987e-17	0.453887	0.0133634	0.0124924	0.00568506	0.0072581	0.0207021
adenoviridae	Bunomys fratrorum	Rodentia	Muridae	FALSE	0	0.123248	0.326939	6.64044e-07	0.228332	4.02208e-18	0.523506	0.12389	6.7155e-07	0.229254	4.12036e-18	0.525626	0.0155675	0.0143948	0.00659711	0.00825908	0.024197
adenoviridae	Bunomys penitus	Rodentia	Muridae	FALSE	0	0.17218	0.376334	6.47317e-06	0.273006	9.42778e-15	0.670253	0.173533	6.58199e-06	0.274704	9.81748e-15	0.675102	0.0258648	0.0230221	0.01202	0.0143177	0.0402334
adenoviridae	Bunomys prolatus	Rodentia	Muridae	FALSE	0	0.151326	0.363518	6.77417e-07	0.254698	1.49904e-16	0.574293	0.151973	6.84281e-07	0.255605	1.5308e-16	0.577344	0.0133986	0.0125154	0.00569815	0.0072765	0.0207466
adenoviridae	Burramys parvus	Diprotodontia	Burramyidae	FALSE	0	0.0251771	0.157337	0	0.152191	0	1.36128e-08	0.0251805	0	0.152212	0	1.38997e-08	0.00658239	0.00337008	0.00928952	0.000522563	0.0161076
adenoviridae	Cabassous centralis	Cingulata	Chlamyphoridae	FALSE	0	0.234863	0.419802	6.51346e-09	0.404398	0	0.993215	0.236137	6.57563e-09	0.405525	0	0.993244	0.0323796	0.0181707	0.0427069	0.00301845	0.0795556
adenoviridae	Cabassous chacoensis	Cingulata	Chlamyphoridae	FALSE	0	0.384536	0.485534	2.52198e-06	0.451339	8.86756e-39	0.979883	0.384781	2.64894e-06	0.451567	8.89259e-39	0.980067	0.00890954	0.00515439	0.0109165	0.000747269	0.0205323
adenoviridae	Cabassous tatouay	Cingulata	Chlamyphoridae	FALSE	0	0.520237	0.499466	0.803556	0.445494	2.59739e-32	0.999625	0.520767	0.80661	0.445764	2.63035e-32	0.999631	0.0168787	0.00976402	0.0201586	0.001369	0.0401125
adenoviridae	Cabassous unicinctus	Cingulata	Chlamyphoridae	FALSE	0	0.332917	0.47086	2.98835e-07	0.458162	1.05681e-35	0.999869	0.333076	3.2475e-07	0.458343	1.0584e-35	0.999872	0.0190193	0.0110061	0.0226582	0.00154931	0.0447628
adenoviridae	Cacajao calvus	Primates	Pitheciidae	FALSE	0	0.880599	0.32717	0.95616	0.186962	0.750177	0.997084	0.887319	0.959779	0.183393	0.768892	0.997276	0.0813123	0.0768626	0.0347865	0.0396621	0.127538
adenoviridae	Cacajao hosomi	Primates	Pitheciidae	FALSE	0	0.785601	0.406952	0.906063	0.298851	0.123397	0.991355	0.792728	0.914625	0.298382	0.136044	0.992233	0.0773123	0.0730156	0.0332661	0.0375651	0.121154
adenoviridae	Caenolestes caniventer	Paucituberculata	Caenolestidae	FALSE	0	1.04413e-05	0	0	8.96941e-05	0	2.76097e-14	1.04455e-05	0	8.97286e-05	0	2.78053e-14	0.00917458	0.00478167	0.0147492	0.000564941	0.0212426
adenoviridae	Caenolestes condorensis	Paucituberculata	Caenolestidae	FALSE	0	7.48996e-06	0	0	6.34195e-05	0	4.41681e-10	7.4921e-06	0	6.34314e-05	0	4.43675e-10	0.00908255	0.00475102	0.0146379	0.000559886	0.020953
adenoviridae	Caenolestes convelatus	Paucituberculata	Caenolestidae	FALSE	0	1.85373e-07	0	0	1.01402e-06	0	4.27738e-13	1.86351e-07	0	1.0201e-06	0	4.32606e-13	0.00948661	0.00491982	0.0151299	0.000584435	0.0222699
adenoviridae	Caenolestes fuliginosus	Paucituberculata	Caenolestidae	FALSE	0	5.36717e-07	0	0	4.33359e-06	0	2.90051e-11	5.3868e-07	0	4.35025e-06	0	2.91939e-11	0.0101912	0.00528735	0.0160068	0.000659488	0.0240612
adenoviridae	Calcochloris obtusirostris	Afrosoricida	Chrysochloridae	FALSE	0	2.68985e-10	0	0	2.3139e-09	0	0	2.69784e-10	0	2.32077e-09	0	0	0.0079255	0.00465852	0.0108379	0.00060666	0.0196029
adenoviridae	Calcochloris tytonis	Afrosoricida	Chrysochloridae	FALSE	0	1.50688e-10	0	0	1.29627e-09	0	0	1.51063e-10	0	1.29949e-09	0	0	0.00669821	0.00383017	0.00904133	0.000508186	0.0167025
adenoviridae	Callibella humilis	Primates	Callitrichidae	FALSE	0	0.653572	0.475855	0.849886	0.399463	3.19963e-07	0.972913	0.654573	0.853642	0.399945	3.25009e-07	0.973671	0.0152366	0.0112399	0.0138346	0.00205848	0.0335983
adenoviridae	Callicebus barbarabrownae	Primates	Pitheciidae	FALSE	0	0.312928	0.462493	1.9261e-05	0.410055	2.10084e-19	0.938862	0.31401	1.94872e-05	0.411128	2.17624e-19	0.939458	0.0223548	0.0190429	0.0153545	0.00664097	0.0421555
adenoviridae	Callicebus coimbrai	Primates	Pitheciidae	FALSE	0	0.302226	0.460619	7.46263e-06	0.400261	1.03271e-18	0.927362	0.303406	7.51882e-06	0.401423	1.0666e-18	0.927914	0.0209798	0.017789	0.0144523	0.00618147	0.0397921
adenoviridae	Callicebus melanochir	Primates	Pitheciidae	FALSE	0	0.351897	0.479115	0.000425856	0.425153	2.02788e-24	0.96523	0.353006	0.000437668	0.426125	2.06631e-24	0.965724	0.0266368	0.0228963	0.0183019	0.00767959	0.0505544
adenoviridae	Callicebus nigrifrons	Primates	Pitheciidae	FALSE	0	0.493188	0.499987	0.740814	0.448389	8.21925e-15	0.996038	0.498996	0.770274	0.452175	8.80081e-15	0.996535	0.108775	0.102302	0.0463954	0.0546604	0.168716
adenoviridae	Callicebus personatus	Primates	Pitheciidae	FALSE	0	0.349429	0.480521	0.000329371	0.415112	7.51392e-16	0.942085	0.355104	0.000386001	0.419531	8.27227e-16	0.947723	0.0935745	0.0882825	0.0397997	0.0467811	0.1468
adenoviridae	Callimico goeldii	Primates	Callitrichidae	FALSE	0	0.967666	0.170862	0.988839	0.0469414	0.898762	0.999919	0.977615	0.991525	0.0320589	0.934442	0.999935	0.284514	0.279389	0.0905219	0.171143	0.407872
adenoviridae	Callistomys pictus	Rodentia	Echimyidae	FALSE	0	0.006978	0.0827792	1.11861e-28	0.0579909	0	3.75953e-07	0.0069968	1.14642e-28	0.0581418	0	3.78378e-07	0.00657019	0.00475312	0.00619612	0.00103242	0.0146937
adenoviridae	Callithrix aurita	Primates	Callitrichidae	FALSE	0	0.867576	0.3374	0.910255	0.173559	0.73929	0.988304	0.869528	0.911238	0.172691	0.742047	0.988884	0.0220051	0.0158968	0.0201478	0.00306732	0.0489042
adenoviridae	Callithrix flaviceps	Primates	Callitrichidae	FALSE	0	0.885216	0.321182	0.928718	0.165588	0.780139	0.990511	0.886415	0.928963	0.165208	0.782985	0.990911	0.0157387	0.011617	0.0142806	0.00211467	0.0345119
adenoviridae	Callithrix geoffroyi	Primates	Callitrichidae	TRUE	1	1	0	1	0	1	1	0.933558	0.947523	0.0624995	0.848675	0.998931	0.440538	0.440467	0.116424	0.292748	0.594293
adenoviridae	Callithrix jacchus	Primates	Callitrichidae	FALSE	0	0.880617	0.324845	0.938558	0.136989	0.711722	0.999946	0.974747	0.989507	0.0375204	0.932522	0.999984	0.753271	0.781183	0.136512	0.561955	0.905374
adenoviridae	Callithrix kuhlii	Primates	Callitrichidae	FALSE	0	0.939165	0.244753	0.958829	0.056558	0.847063	0.999023	0.940115	0.959512	0.0556074	0.849242	0.999069	0.0185443	0.013542	0.0168581	0.00248405	0.0407639
adenoviridae	Callithrix penicillata	Primates	Callitrichidae	FALSE	0	0.955442	0.207304	0.995637	0.0833252	0.852122	0.999999	0.987464	0.99921	0.021906	0.95783	1	0.656831	0.667289	0.125914	0.488484	0.807376
adenoviridae	Callosciurus adamsi	Rodentia	Sciuridae	FALSE	0	0.545973	0.496854	0.848238	0.460996	3.69276e-14	0.998484	0.546092	0.84854	0.461053	3.71105e-14	0.998489	0.0047732	0.00367746	0.00425171	0.000824653	0.0101905
adenoviridae	Callosciurus albescens	Rodentia	Sciuridae	FALSE	0	0.123071	0.328552	8.62601e-16	0.295346	4.78066e-36	0.736329	0.123147	8.65487e-16	0.295518	4.80067e-36	0.737295	0.00514623	0.00396805	0.00456855	0.000859863	0.01101
adenoviridae	Callosciurus baluensis	Rodentia	Sciuridae	FALSE	0	0.291668	0.452597	9.92785e-08	0.40632	1.10934e-27	0.942871	0.291792	9.96096e-08	0.406462	1.11143e-27	0.943029	0.00440584	0.00342752	0.00394931	0.000757889	0.0094356
adenoviridae	Callosciurus caniceps	Rodentia	Sciuridae	FALSE	0	0.683994	0.461708	0.859048	0.370095	3.25003e-08	0.985767	0.684577	0.85939	0.370099	3.2591e-08	0.985881	0.00779269	0.00593835	0.00696693	0.00129754	0.0165394
adenoviridae	Callosciurus erythraeus	Rodentia	Sciuridae	FALSE	0	0.950093	0.225028	0.981942	0.0692396	0.860538	0.999979	0.960218	0.985916	0.0534713	0.88205	0.999985	0.192201	0.16653	0.100658	0.0897358	0.336692
adenoviridae	Callosciurus finlaysonii	Rodentia	Sciuridae	FALSE	0	0.693489	0.460661	0.872877	0.36921	0.000247666	0.984771	0.695582	0.874464	0.36922	0.000261174	0.985313	0.0284088	0.0234291	0.0187475	0.011495	0.0513202
adenoviridae	Callosciurus inornatus	Rodentia	Sciuridae	FALSE	0	0.424041	0.494373	0.0347703	0.444106	9.62986e-15	0.965476	0.42432	0.0351142	0.444321	9.68628e-15	0.96559	0.00656749	0.00504027	0.00583427	0.0011003	0.0142688
adenoviridae	Callosciurus melanogaster	Rodentia	Sciuridae	FALSE	0	0.14165	0.350379	1.60045e-09	0.310257	0	0.778786	0.141721	1.61592e-09	0.31035	0	0.778971	0.00416602	0.00324642	0.00375826	0.000703913	0.00891853
adenoviridae	Callosciurus nigrovittatus	Rodentia	Sciuridae	FALSE	0	0.10159	0.306166	1.8778e-13	0.276693	0	0.704291	0.101741	1.88781e-13	0.27709	0	0.705374	0.00881351	0.0067179	0.0079246	0.00144024	0.0190022
adenoviridae	Callosciurus notatus	Rodentia	Sciuridae	FALSE	0	0.854576	0.354206	0.961947	0.286513	0.491544	0.999753	0.858374	0.966187	0.285985	0.511799	0.999763	0.077927	0.0635181	0.0498583	0.0322848	0.147821
adenoviridae	Callosciurus orestes	Rodentia	Sciuridae	FALSE	0	0.0440708	0.202857	4.51901e-28	0.18638	0	6.21944e-06	0.0440918	4.54058e-28	0.186463	0	6.26057e-06	0.00440932	0.00343042	0.00395212	0.000758678	0.00944566
adenoviridae	Callosciurus phayrei	Rodentia	Sciuridae	FALSE	0	0.661734	0.475466	0.839849	0.382514	5.31555e-05	0.984636	0.662041	0.840447	0.382574	5.32434e-05	0.984714	0.00472225	0.00364074	0.00420915	0.000814578	0.0100424
adenoviridae	Callosciurus prevostii	Rodentia	Sciuridae	FALSE	0	0.948194	0.218769	0.976069	0.118875	0.910856	0.999204	0.952643	0.977406	0.117443	0.920298	0.999416	0.124081	0.103412	0.073663	0.0530891	0.227327
adenoviridae	Callosciurus pygerythrus	Rodentia	Sciuridae	FALSE	0	0.397541	0.487682	0.00134597	0.436413	6.94912e-16	0.964736	0.397853	0.00135309	0.436663	6.97947e-16	0.964869	0.00693219	0.00530577	0.00616872	0.0011597	0.0148576
adenoviridae	Callosciurus quinquestriatus	Rodentia	Sciuridae	FALSE	0	0.65234	0.475951	0.828315	0.38873	2.02327e-05	0.983487	0.652642	0.828568	0.388803	2.02649e-05	0.98357	0.0046813	0.00362803	0.00417507	0.000807366	0.0099612
adenoviridae	Callospermophilus lateralis	Rodentia	Sciuridae	FALSE	0	0.829998	0.377988	0.89776	0.243859	0.68579	0.995205	0.849885	0.912369	0.240761	0.729229	0.995874	0.202363	0.178719	0.102331	0.0957808	0.347117
adenoviridae	Callospermophilus madrensis	Rodentia	Sciuridae	FALSE	0	0.635284	0.481318	0.824315	0.387581	8.92302e-07	0.972754	0.635585	0.824645	0.387691	8.93851e-07	0.972858	0.00408873	0.0031748	0.00369794	0.000690569	0.00871748
adenoviridae	Callospermophilus saturatus	Rodentia	Sciuridae	FALSE	0	0.845125	0.360949	0.939776	0.245383	0.696568	0.994549	0.845396	0.94065	0.245361	0.698049	0.99457	0.00422921	0.00328166	0.00380805	0.000721676	0.00906701
adenoviridae	Calomys boliviae	Rodentia	Cricetidae	FALSE	0	0.255714	0.435071	1.22643e-06	0.36662	2.90416e-18	0.816943	0.255938	1.23869e-06	0.366884	2.90845e-18	0.817142	0.00400101	0.00283345	0.00388113	0.000581866	0.00878231
adenoviridae	Calomys callidus	Rodentia	Cricetidae	FALSE	0	0.208615	0.406594	6.09782e-06	0.33941	2.63407e-17	0.775824	0.209874	6.18666e-06	0.341115	2.6804e-17	0.791379	0.0293638	0.0224543	0.0244023	0.00945244	0.0557928
adenoviridae	Calomys callosus	Rodentia	Cricetidae	FALSE	0	0.880952	0.322726	0.925872	0.167458	0.784466	0.99475	0.892397	0.937447	0.164895	0.803469	0.996023	0.138695	0.114706	0.0877201	0.0545919	0.255369
adenoviridae	Calomys expulsus	Rodentia	Cricetidae	FALSE	0	0.843288	0.367807	0.895268	0.217781	0.742702	0.995474	0.843922	0.895712	0.217717	0.743817	0.99549	0.00631588	0.00440648	0.00613262	0.000889899	0.0137433
adenoviridae	Calomys fecundus	Rodentia	Cricetidae	FALSE	0	0.239896	0.427932	4.16396e-05	0.346633	3.89591e-14	0.804674	0.240613	4.19435e-05	0.347382	3.94337e-14	0.806395	0.0142885	0.0112014	0.0116956	0.00474619	0.0264227
adenoviridae	Calomys hummelincki	Rodentia	Cricetidae	FALSE	0	0.113406	0.316959	9.42545e-09	0.267893	5.41681e-27	0.645231	0.11351	9.44778e-09	0.26803	5.44946e-27	0.645526	0.00430709	0.00300617	0.00416199	0.000622139	0.00935333
adenoviridae	Calomys laucha	Rodentia	Cricetidae	FALSE	0	0.348303	0.476875	0.00178733	0.393888	7.7138e-12	0.895451	0.351583	0.00180124	0.396693	8.21128e-12	0.898149	0.0451024	0.0349332	0.0339171	0.0159822	0.087442
adenoviridae	Calomys lepidus	Rodentia	Cricetidae	FALSE	0	0.0621719	0.243681	1.14169e-16	0.200601	1.03967e-37	0.0904417	0.0622451	1.14723e-16	0.200804	1.04411e-37	0.0905726	0.00482957	0.00335495	0.00465728	0.000694514	0.0103693
adenoviridae	Calomys musculinus	Rodentia	Cricetidae	FALSE	0	0.249413	0.430383	2.75812e-06	0.369384	2.44401e-16	0.87337	0.251238	3.02354e-06	0.371042	2.49554e-16	0.875763	0.0452926	0.0350714	0.0340374	0.0160542	0.0878021
adenoviridae	Calomys sorellus	Rodentia	Cricetidae	FALSE	0	0.0953555	0.291271	2.05867e-15	0.251589	4.74192e-35	0.552084	0.0954459	2.06439e-15	0.251787	4.74897e-35	0.553647	0.00415546	0.00293617	0.00402185	0.000602357	0.00906423
adenoviridae	Calomys tener	Rodentia	Cricetidae	FALSE	0	0.935107	0.249675	0.986756	0.164095	0.891645	0.999381	0.944142	0.990073	0.16046	0.907052	0.999511	0.241153	0.218233	0.127235	0.103952	0.424537
adenoviridae	Calomys tocantinsi	Rodentia	Cricetidae	FALSE	0	0.353913	0.477345	0.00309642	0.401594	1.67944e-11	0.92519	0.354141	0.00311808	0.40178	1.6948e-11	0.925267	0.00380292	0.00270539	0.00370403	0.000556829	0.00835536
adenoviridae	Calomys venustus	Rodentia	Cricetidae	FALSE	0	0.210512	0.404648	8.17833e-07	0.348823	5.80883e-18	0.830031	0.210724	8.21188e-07	0.349077	5.84378e-18	0.830202	0.00373933	0.0026705	0.00364808	0.000547416	0.00822307
adenoviridae	Calomyscus bailwardi	Rodentia	Calomyscidae	FALSE	0	0.0391653	0.187531	3.96402e-29	0.163477	0	3.11901e-07	0.0392033	4.09611e-29	0.163608	0	3.13359e-07	0.00847813	0.00593622	0.00890914	0.00124712	0.0181118
adenoviridae	Calomyscus baluchi	Rodentia	Calomyscidae	FALSE	0	0.0450279	0.213555	1.69868e-30	0.170208	0	0.000865105	0.0450966	1.70589e-30	0.170439	0	0.000866468	0.0103595	0.00717503	0.010813	0.00152601	0.0226095
adenoviridae	Calomyscus elburzensis	Rodentia	Calomyscidae	FALSE	0	0.0211114	0.147333	1.71263e-27	0.128968	0	6.06418e-07	0.0211652	1.72174e-27	0.12925	0	6.09184e-07	0.00876329	0.00610392	0.00919156	0.00129666	0.0186268
adenoviridae	Calomyscus grandis	Rodentia	Calomyscidae	FALSE	0	0.0355191	0.189007	1.11432e-28	0.144522	0	1.30313e-05	0.035565	1.14362e-28	0.144701	0	1.30863e-05	0.00778264	0.00548036	0.00823333	0.00116368	0.0163637
adenoviridae	Calomyscus hotsoni	Rodentia	Calomyscidae	FALSE	0	0.0712684	0.254978	1.54493e-29	0.228282	0	0.0180581	0.0713073	1.55698e-29	0.228386	0	0.0181612	0.00817719	0.00577722	0.00861427	0.00118792	0.0174253
adenoviridae	Calomyscus mystax	Rodentia	Calomyscidae	FALSE	0	0.0131019	0.113703	2.14151e-27	0.112679	0	8.55401e-07	0.0131032	2.14922e-27	0.112691	0	8.60735e-07	0.00859981	0.00599909	0.00902932	0.00127309	0.0182982
adenoviridae	Calomyscus tsolovi	Rodentia	Calomyscidae	FALSE	0	0.385311	0.48551	0.410381	0.366	5.62045e-16	0.815515	0.385997	0.411389	0.366529	5.67246e-16	0.81742	0.00775639	0.00546035	0.00820824	0.00116239	0.0162705
adenoviridae	Calomyscus urartensis	Rodentia	Calomyscidae	FALSE	0	0.0134827	0.11954	4.82664e-28	0.114687	0	8.19775e-08	0.0134838	4.83261e-28	0.114687	0	8.21852e-08	0.00777764	0.0054781	0.00822855	0.00116343	0.0163462
adenoviridae	Caluromys derbianus	Didelphimorphia	Didelphidae	FALSE	0	0.564904	0.494524	0.910256	0.46909	1.4707e-11	0.999894	0.565373	0.911097	0.469282	1.62951e-11	0.999899	0.0306569	0.0104799	0.0616469	0.00172523	0.0820566
adenoviridae	Caluromys lanatus	Didelphimorphia	Didelphidae	FALSE	0	0.430061	0.494067	0.349244	0.439337	2.25465e-29	0.997239	0.430481	0.350555	0.439643	2.2657e-29	0.997245	0.0119739	0.00676432	0.0161726	0.000998844	0.0286454
adenoviridae	Caluromys philander	Didelphimorphia	Didelphidae	FALSE	0	0.829263	0.372081	0.993352	0.347388	2.00466e-06	0.999986	0.830157	0.993427	0.347608	2.02572e-06	0.999986	0.0538457	0.0167661	0.101141	0.00258573	0.157038
adenoviridae	Caluromysiops irrupta	Didelphimorphia	Didelphidae	FALSE	0	0.159816	0.362666	2.10655e-17	0.339504	0	0.857042	0.159901	2.14427e-17	0.339667	0	0.857983	0.00567802	0.00327651	0.00760203	0.000512959	0.0130778
adenoviridae	Calyptophractus retusus	Cingulata	Chlamyphoridae	FALSE	0	0.15459	0.362286	1.54694e-19	0.333322	0	0.817209	0.154723	1.55193e-19	0.333572	0	0.819393	0.00822018	0.00478881	0.0101524	0.000688293	0.0190395
adenoviridae	Camelus ferus	Cetartiodactyla	Camelidae	FALSE	0	0.789533	0.408654	0.931735	0.316293	0.00290235	0.999314	0.790115	0.932522	0.316324	0.00292617	0.999317	0.00697974	0.00356609	0.0106081	0.00046872	0.0170962
adenoviridae	Canis adustus	Carnivora	Canidae	TRUE	1	1	0	1	0	1	1	0.975009	0.997155	0.0384977	0.928824	0.999996	0.721958	0.726323	0.104448	0.585212	0.849776
adenoviridae	Canis aureus	Carnivora	Canidae	FALSE	0	0.870074	0.335421	0.972948	0.193116	0.630679	0.999998	0.958734	0.993416	0.118804	0.907806	1	0.796108	0.803109	0.0881609	0.680133	0.910134
adenoviridae	Canis latrans	Carnivora	Canidae	TRUE	1	1	0	1	0	1	1	0.984205	0.996578	0.0301178	0.945838	1	0.927077	0.939737	0.0543615	0.851449	0.983296
adenoviridae	Canis lupus	Carnivora	Canidae	TRUE	1	1	0	1	0	1	1	0.997272	0.999974	0.00667325	0.991773	1	0.943443	0.958591	0.051264	0.870762	0.993208
adenoviridae	Canis mesomelas	Carnivora	Canidae	TRUE	1	1	0	1	0	1	1	0.972463	0.987119	0.033035	0.931742	0.999842	0.787074	0.792732	0.0905322	0.66778	0.903936
adenoviridae	Canis rufus	Carnivora	Canidae	FALSE	0	0.905661	0.289308	0.957216	0.148308	0.823286	0.999512	0.906238	0.957241	0.147815	0.826073	0.999512	0.00843736	0.00548019	0.0101492	0.000951919	0.0175783
adenoviridae	Canis simensis	Carnivora	Canidae	TRUE	1	1	0	1	0	1	1	0.950866	0.976892	0.0709105	0.876522	0.999996	0.279849	0.267285	0.10051	0.159868	0.406276
adenoviridae	Cannomys badius	Rodentia	Spalacidae	FALSE	0	0.421388	0.494267	0.0419117	0.445925	1.60072e-19	0.967811	0.422054	0.0425298	0.446299	1.60716e-19	0.969112	0.0149254	0.0113299	0.0144962	0.0020888	0.0315712
adenoviridae	Cansumys canus	Rodentia	Cricetidae	FALSE	0	0.771068	0.422489	0.800227	0.191146	0.659514	0.942352	0.771769	0.800857	0.190989	0.661624	0.942408	0.00439299	0.00305508	0.00424217	0.000633459	0.00953538
adenoviridae	Capra aegagrus	Cetartiodactyla	Bovidae	FALSE	0	0.904628	0.287467	0.934766	0.126883	0.795433	0.996693	0.92938	0.951487	0.104873	0.848941	0.997669	0.279934	0.247221	0.18741	0.0620734	0.547812
adenoviridae	Capra caucasica	Cetartiodactyla	Bovidae	FALSE	0	0.922088	0.267225	0.940053	0.0719698	0.819142	0.99876	0.924537	0.941999	0.0698351	0.821484	0.998836	0.0420822	0.0271394	0.043302	0.00789078	0.0953923
adenoviridae	Capra cylindricornis	Cetartiodactyla	Bovidae	FALSE	0	0.901604	0.294042	0.92044	0.104491	0.801658	0.996361	0.901955	0.920536	0.104308	0.80207	0.996376	0.00567243	0.00314314	0.0071417	0.000403301	0.0143088
adenoviridae	Capra falconeri	Cetartiodactyla	Bovidae	FALSE	0	0.865531	0.346363	0.893352	0.166909	0.76774	0.98697	0.867297	0.894483	0.166381	0.778091	0.987166	0.020566	0.0140586	0.0205645	0.0040283	0.0461359
adenoviridae	Capra ibex	Cetartiodactyla	Bovidae	TRUE	1	1	0	1	0	1	1	0.948376	0.97301	0.0608887	0.85141	0.999787	0.316725	0.286551	0.203249	0.0688812	0.598572
adenoviridae	Capra nubiana	Cetartiodactyla	Bovidae	FALSE	1	1	0	1	0	1	1	0.906319	0.927379	0.0858042	0.785518	0.992247	0.0760567	0.050992	0.0734385	0.0140488	0.17281
adenoviridae	Capra pyrenaica	Cetartiodactyla	Bovidae	FALSE	0	0.910402	0.281688	0.944665	0.129904	0.807203	0.997397	0.913512	0.945353	0.128218	0.822084	0.997651	0.0485409	0.0314187	0.0491565	0.0090039	0.110878
adenoviridae	Capra sibirica	Cetartiodactyla	Bovidae	FALSE	0	0.914939	0.273907	0.933226	0.0767644	0.814965	0.996433	0.917842	0.933804	0.072993	0.819141	0.996502	0.0363327	0.0253647	0.035943	0.00705358	0.0775672
adenoviridae	Capra walie	Cetartiodactyla	Bovidae	FALSE	0	0.881308	0.324493	0.929821	0.171181	0.753978	0.995227	0.881632	0.930223	0.171095	0.754475	0.995249	0.00560936	0.00310962	0.00706642	0.000399895	0.0141661
adenoviridae	Capreolus capreolus	Cetartiodactyla	Cervidae	FALSE	1	1	0	1	0	1	1	0.968666	0.987887	0.0464871	0.907987	0.99977	0.847147	0.884884	0.125831	0.671846	0.974038
adenoviridae	Capreolus pygargus	Cetartiodactyla	Cervidae	FALSE	0	0.941356	0.236372	0.979851	0.0915834	0.834323	0.999874	0.961354	0.986332	0.0525933	0.88641	0.999908	0.290931	0.265838	0.159423	0.111404	0.516148
adenoviridae	Capricornis crispus	Cetartiodactyla	Bovidae	FALSE	0	0.92821	0.264036	0.966703	0.125656	0.82414	0.9997	0.932416	0.972595	0.1233	0.835437	0.999704	0.0674732	0.0447306	0.0662278	0.0128515	0.151562
adenoviridae	Capricornis rubidus	Cetartiodactyla	Bovidae	FALSE	0	0.824366	0.378765	0.901941	0.243003	0.678764	0.989818	0.824692	0.901992	0.243017	0.680389	0.989881	0.00637701	0.00348717	0.00799458	0.000450268	0.0158805
adenoviridae	Capricornis sumatraensis	Cetartiodactyla	Bovidae	FALSE	0	0.862161	0.347712	0.905773	0.197546	0.732786	0.99347	0.866541	0.914826	0.196741	0.762945	0.9937	0.0531192	0.0376276	0.0518162	0.0104988	0.113435
adenoviridae	Capricornis swinhoei	Cetartiodactyla	Bovidae	FALSE	0	0.789815	0.40638	0.935954	0.314746	0.125544	0.995042	0.790253	0.936193	0.314742	0.125629	0.995094	0.00694606	0.00378161	0.0086959	0.000513057	0.0170518
adenoviridae	Caprolagus hispidus	Lagomorpha	Leporidae	FALSE	0	0.4609	0.498523	0.510696	0.444299	9.49637e-22	0.980726	0.461194	0.511046	0.444499	9.52498e-22	0.980734	0.00682252	0.0037965	0.00881987	0.000641392	0.0167761
adenoviridae	Capromys pilorides	Rodentia	Capromyidae	FALSE	0	0.0886973	0.279624	7.83544e-25	0.264537	0	0.255201	0.0887681	7.90157e-25	0.264692	0	0.255489	0.00959144	0.0071961	0.00901175	0.00133159	0.0206669
adenoviridae	Caracal aurata	Carnivora	Felidae	FALSE	0	0.420464	0.492653	0.183103	0.440659	9.29404e-22	0.994954	0.421036	0.184403	0.441089	9.38864e-22	0.994987	0.0219271	0.0140949	0.0260647	0.00236783	0.0492954
adenoviridae	Caracal caracal	Carnivora	Felidae	FALSE	0	0.869328	0.334868	0.96786	0.220527	0.600837	0.999992	0.963637	0.991701	0.117744	0.912485	0.999999	0.602925	0.694929	0.308717	0.17041	0.946708
adenoviridae	Cardiocranius paradoxus	Rodentia	Dipodidae	FALSE	0	0.108482	0.310254	1.04292e-09	0.238377	5.25987e-38	0.563638	0.108962	1.0726e-09	0.239282	5.47946e-38	0.565724	0.0119361	0.00834223	0.0124516	0.00159132	0.0271952
adenoviridae	Cardioderma cor	Chiroptera	Megadermatidae	TRUE	1	1	0	1	0	1	1	0.977667	0.996178	0.0345802	0.908767	0.99997	0.355252	0.358201	0.0886261	0.239168	0.462592
adenoviridae	Carlito syrichta	Primates	Tarsiidae	FALSE	0	1.22008e-08	0	0	8.84288e-08	0	6.20851e-16	1.22776e-08	0	8.87057e-08	0	6.25152e-16	0.0224824	0.015482	0.0227959	0.00295421	0.0502395
adenoviridae	Carollia benkeithi	Chiroptera	Phyllostomidae	FALSE	0	0.658727	0.476591	0.842869	0.378174	4.80171e-05	0.967417	0.658934	0.843034	0.378234	4.81965e-05	0.967448	0.00389576	0.00295005	0.0034262	0.000635139	0.00858692
adenoviridae	Carollia brevicauda	Chiroptera	Phyllostomidae	FALSE	0	0.591225	0.490081	0.789145	0.393253	2.19662e-06	0.953373	0.625886	0.851028	0.406917	4.05411e-06	0.970253	0.373293	0.371488	0.083195	0.269142	0.483132
adenoviridae	Carollia castanea	Chiroptera	Phyllostomidae	FALSE	0	0.555103	0.496471	0.825208	0.427516	9.38281e-11	0.960383	0.555287	0.825312	0.427614	9.42206e-11	0.96055	0.00477384	0.00360797	0.00419317	0.000776269	0.0104083
adenoviridae	Carollia manu	Chiroptera	Phyllostomidae	FALSE	0	0.339613	0.471145	0.000918709	0.374018	7.30878e-12	0.839739	0.339745	0.000921823	0.374129	7.31307e-12	0.839925	0.00230197	0.00167872	0.0021281	0.000367657	0.00517651
adenoviridae	Carollia perspicillata	Chiroptera	Phyllostomidae	TRUE	1	1	0	1	0	1	1	0.969738	0.980285	0.0291868	0.929321	0.99919	0.834308	0.858025	0.110894	0.676052	0.95932
adenoviridae	Carollia sowelli	Chiroptera	Phyllostomidae	FALSE	0	0.588784	0.492756	0.782338	0.375387	2.2598e-08	0.934953	0.618982	0.827275	0.386103	3.19728e-08	0.951644	0.286599	0.282576	0.0735156	0.195004	0.379299
adenoviridae	Carollia subrufa	Chiroptera	Phyllostomidae	FALSE	0	0.586773	0.49318	0.778363	0.347332	9.05109e-06	0.86337	0.591481	0.78242	0.34926	9.52462e-06	0.867114	0.0408	0.0392608	0.0150462	0.0234372	0.0613077
adenoviridae	Carpitalpa arendsi	Afrosoricida	Chrysochloridae	FALSE	0	8.53091e-06	0	0	7.33857e-05	0	0	8.55238e-06	0	7.35704e-05	0	0	0.00678033	0.00389152	0.00915993	0.000514318	0.0168577
adenoviridae	Carpomys melanurus	Rodentia	Muridae	FALSE	0	7.72761e-09	0	0	4.94992e-08	0	1.77952e-22	7.83198e-09	0	5.02485e-08	0	1.80541e-22	0.0133935	0.0125118	0.00569626	0.00727404	0.0207402
adenoviridae	Carpomys phaeurus	Rodentia	Muridae	FALSE	0	3.80233e-09	0	0	2.30788e-08	0	2.44729e-25	3.84422e-09	0	2.33486e-08	0	2.47029e-25	0.0134238	0.0125342	0.00570756	0.00728873	0.0207735
adenoviridae	Carterodon sulcidens	Rodentia	Echimyidae	FALSE	0	1.9379e-06	0	0	1.60461e-05	0	2.53834e-17	1.94563e-06	0	1.61072e-05	0	2.55297e-17	0.00707756	0.00502155	0.00672394	0.00111675	0.015879
adenoviridae	Caryomys eva	Rodentia	Cricetidae	FALSE	0	0.908537	0.291132	0.931302	0.10142	0.791269	0.997139	0.914747	0.934575	0.0945727	0.811243	0.997379	0.0797451	0.0630575	0.0565032	0.0288847	0.153098
adenoviridae	Caryomys inez	Rodentia	Cricetidae	FALSE	0	0.761491	0.427083	0.802394	0.184975	0.62487	0.92161	0.764843	0.805015	0.184513	0.630163	0.923378	0.020311	0.0157738	0.0153495	0.00716029	0.0382371
adenoviridae	Casinycteris argynnis	Chiroptera	Pteropodidae	FALSE	0	0.866852	0.331172	0.88877	0.157368	0.799122	0.978376	0.873838	0.896465	0.156744	0.809842	0.980287	0.0704132	0.0682238	0.0213282	0.0450387	0.0972678
adenoviridae	Catagonus wagneri	Cetartiodactyla	Tayassuidae	FALSE	0	0.811528	0.390952	0.928958	0.293277	0.245887	0.996792	0.811993	0.929048	0.293313	0.246025	0.996823	0.00738637	0.00425865	0.00989801	0.000543658	0.0179185
adenoviridae	Catopuma badia	Carnivora	Felidae	FALSE	0	0.383962	0.486713	0.00170593	0.438732	1.05041e-22	0.985431	0.384326	0.00171791	0.439054	1.17384e-22	0.985511	0.012279	0.00772818	0.0145422	0.00131756	0.026643
adenoviridae	Catopuma temminckii	Carnivora	Felidae	FALSE	0	0.922288	0.26927	0.971502	0.133924	0.796775	0.999571	0.923234	0.972075	0.132693	0.799263	0.999572	0.0129171	0.00816176	0.0153148	0.00139344	0.0282613
adenoviridae	Cavia aperea	Rodentia	Caviidae	FALSE	1	1	0	1	0	1	1	0.954328	0.990764	0.0705917	0.834378	0.999905	0.0320021	0.0245888	0.0269814	0.00798951	0.0656691
adenoviridae	Cavia fulgida	Rodentia	Caviidae	FALSE	0	0.510121	0.499831	0.793838	0.456535	1.22483e-34	0.998158	0.511171	0.79847	0.457191	1.2387e-34	0.998192	0.0249145	0.0191841	0.0207433	0.00645379	0.0511424
adenoviridae	Cavia intermedia	Rodentia	Caviidae	FALSE	0	0.117368	0.323081	2.59007e-36	0.310679	0	0.837622	0.117446	2.66924e-36	0.310824	0	0.839563	0.0126331	0.0100632	0.0100719	0.0034052	0.0247556
adenoviridae	Cavia magna	Rodentia	Caviidae	FALSE	0	0.215972	0.412408	2.42808e-11	0.380574	0	0.920729	0.21626	2.43873e-11	0.380941	0	0.921273	0.0138326	0.0111847	0.0110314	0.00372415	0.0273505
adenoviridae	Cavia patzelti	Rodentia	Caviidae	FALSE	0	0.485617	0.499747	0.705499	0.449974	3.73607e-12	0.989055	0.4861	0.711289	0.450311	3.79823e-12	0.989274	0.0127386	0.0101245	0.0101543	0.00343702	0.0249292
adenoviridae	Cavia tschudii	Rodentia	Caviidae	FALSE	0	0.233299	0.42518	5.25909e-11	0.389349	3.2757e-33	0.968972	0.233608	5.43895e-11	0.389706	3.34377e-33	0.969511	0.0173609	0.0140011	0.0140349	0.00472048	0.0347658
adenoviridae	Cebuella niveiventris	Primates	Callitrichidae	FALSE	0	0.890887	0.317568	0.91609	0.134692	0.803893	0.988953	0.893158	0.917279	0.133974	0.810083	0.989379	0.0263053	0.0190239	0.024286	0.00368415	0.0592276
adenoviridae	Cebuella pygmaea	Primates	Callitrichidae	FALSE	0	0.891682	0.309113	0.90589	0.128722	0.807646	0.990708	0.907422	0.925778	0.124496	0.836717	0.992781	0.177982	0.172667	0.0636231	0.102867	0.263845
adenoviridae	Cebus aequatorialis	Primates	Cebidae	FALSE	0	0.854577	0.352403	0.914916	0.214098	0.712936	0.993629	0.855949	0.915996	0.213539	0.721097	0.993687	0.0175123	0.0131175	0.0163699	0.00236389	0.0372897
adenoviridae	Cebus albifrons	Primates	Cebidae	FALSE	0	0.926121	0.264678	0.950758	0.0761633	0.824277	0.997088	0.953941	0.971095	0.0458934	0.897055	0.998374	0.36392	0.357443	0.107507	0.229514	0.508128
adenoviridae	Cebus capucinus	Primates	Cebidae	FALSE	0	0.958668	0.197594	0.986249	0.0526302	0.889398	0.999141	0.972398	0.989907	0.0347245	0.924058	0.999416	0.316286	0.308183	0.0979653	0.195045	0.448077
adenoviridae	Cebus castaneus	Primates	Cebidae	FALSE	0	0.936392	0.241337	0.959403	0.120684	0.864415	0.999187	0.937137	0.959616	0.12047	0.865658	0.999197	0.0206982	0.0153063	0.0194015	0.00287198	0.0441213
adenoviridae	Cebus cesarae	Primates	Cebidae	FALSE	0	0.894186	0.309113	0.935356	0.164453	0.802491	0.992005	0.895236	0.937501	0.164244	0.810687	0.992091	0.0167899	0.0125245	0.0157024	0.00223875	0.035882
adenoviridae	Cebus cuscinus	Primates	Cebidae	FALSE	0	0.923241	0.265956	0.935985	0.0672961	0.826828	0.997835	0.924258	0.936488	0.066464	0.827659	0.997841	0.0180244	0.0134092	0.0168487	0.0024482	0.0384827
adenoviridae	Cebus imitator	Primates	Cebidae	FALSE	0	0.958156	0.205761	0.980825	0.0574539	0.8885	0.999219	0.966666	0.983586	0.0459578	0.915214	0.999413	0.196254	0.187912	0.0699233	0.114511	0.290047
adenoviridae	Cebus kaapori	Primates	Cebidae	FALSE	0	0.935758	0.241518	0.968481	0.121443	0.871727	0.996704	0.936528	0.96865	0.121158	0.872655	0.9968	0.0174388	0.0130689	0.0163016	0.0023509	0.0371188
adenoviridae	Cebus leucocephalus	Primates	Cebidae	FALSE	0	0.952833	0.210134	0.964184	0.0439271	0.893986	0.998491	0.953498	0.964913	0.0433536	0.8951	0.998499	0.0171196	0.0128515	0.0160058	0.00229453	0.0363501
adenoviridae	Cebus malitiosus	Primates	Cebidae	FALSE	0	0.900398	0.306425	0.949733	0.170636	0.80121	0.995197	0.901355	0.951417	0.170107	0.803722	0.995245	0.0161177	0.0119601	0.0150909	0.0021505	0.0349496
adenoviridae	Cebus unicolor	Primates	Cebidae	FALSE	0	0.941959	0.235062	0.958931	0.0525727	0.882908	0.996396	0.943267	0.959085	0.0515172	0.885341	0.996429	0.0283338	0.0209285	0.0268661	0.00389866	0.0590221
adenoviridae	Cebus versicolor	Primates	Cebidae	FALSE	0	0.89952	0.292523	0.948507	0.165035	0.813925	0.991387	0.900526	0.948883	0.164843	0.814663	0.991459	0.0180962	0.0134546	0.0169162	0.00245788	0.038675
adenoviridae	Cebus yuracus	Primates	Cebidae	FALSE	0	0.927236	0.257492	0.958147	0.0851063	0.847349	0.996718	0.928323	0.959614	0.0842233	0.849308	0.996814	0.0204661	0.0151439	0.0191773	0.00283596	0.0434484
adenoviridae	Centronycteris centralis	Chiroptera	Emballonuridae	FALSE	0	0.477562	0.499612	0.705257	0.431572	1.01571e-10	0.959277	0.478009	0.7055	0.431927	1.03321e-10	0.959495	0.00709142	0.00496282	0.00741301	0.000891175	0.0161191
adenoviridae	Centronycteris maximiliani	Chiroptera	Emballonuridae	FALSE	0	0.560249	0.497402	0.827687	0.428549	4.5459e-07	0.970467	0.560712	0.828048	0.428817	4.57461e-07	0.97053	0.00830891	0.00582565	0.00872033	0.00102893	0.0186317
adenoviridae	Centurio senex	Chiroptera	Phyllostomidae	FALSE	0	0.482743	0.499836	0.698022	0.362224	4.78969e-11	0.839566	0.483132	0.69846	0.362437	4.80498e-11	0.840529	0.0047374	0.00358177	0.00416101	0.000769747	0.0103162
adenoviridae	Cephalopachus bancanus	Primates	Tarsiidae	FALSE	0	0.419783	0.493957	0.00148535	0.457009	2.3307e-17	0.995161	0.426051	0.00166274	0.461425	2.61124e-17	0.995748	0.157735	0.149259	0.0679931	0.0779864	0.242864
adenoviridae	Cephalophus adersi	Cetartiodactyla	Bovidae	FALSE	0	0.866305	0.336962	0.890946	0.167368	0.787562	0.987522	0.866622	0.891095	0.167323	0.7884	0.987568	0.00562845	0.0031194	0.00708919	0.000400926	0.0142104
adenoviridae	Cephalophus callipygus	Cetartiodactyla	Bovidae	FALSE	0	0.906795	0.292938	0.966208	0.196893	0.797634	0.999274	0.91128	0.969042	0.196318	0.806653	0.99929	0.0897241	0.0601799	0.0850637	0.0173315	0.200859
adenoviridae	Cephalophus dorsalis	Cetartiodactyla	Bovidae	FALSE	0	0.919118	0.278733	0.974641	0.169895	0.78817	0.999272	0.928395	0.978379	0.166569	0.855063	0.999443	0.164379	0.118353	0.136277	0.0334541	0.354131
adenoviridae	Cephalophus harveyi	Cetartiodactyla	Bovidae	FALSE	0	0.916519	0.279476	0.944949	0.123764	0.834783	0.994868	0.91691	0.945123	0.123672	0.836434	0.994887	0.00933386	0.00506002	0.0117016	0.00067714	0.0236535
adenoviridae	Cephalophus jentinki	Cetartiodactyla	Bovidae	FALSE	0	0.84504	0.357267	0.961848	0.266317	0.570602	0.999521	0.845316	0.96226	0.266276	0.570643	0.99953	0.00689946	0.00375335	0.00863814	0.000507665	0.0169076
adenoviridae	Cephalophus leucogaster	Cetartiodactyla	Bovidae	FALSE	0	0.878784	0.327747	0.978034	0.26607	0.751948	0.997355	0.883876	0.983109	0.266003	0.761838	0.997795	0.150654	0.106557	0.127774	0.0300717	0.330547
adenoviridae	Cephalophus natalensis	Cetartiodactyla	Bovidae	FALSE	0	0.923897	0.26927	0.958997	0.126778	0.858276	0.997451	0.924222	0.959145	0.126573	0.859183	0.997471	0.00879671	0.00477483	0.0110202	0.000645591	0.0220533
adenoviridae	Cephalophus niger	Cetartiodactyla	Bovidae	FALSE	0	0.906704	0.296366	0.99081	0.228828	0.810091	0.999994	0.907943	0.990942	0.228286	0.814254	0.999994	0.0397357	0.0275351	0.0392401	0.00777151	0.0846509
adenoviridae	Cephalophus nigrifrons	Cetartiodactyla	Bovidae	FALSE	0	0.921695	0.274212	0.965028	0.164976	0.845144	0.999386	0.926572	0.966698	0.1643	0.851171	0.999542	0.100582	0.0685822	0.0936614	0.0197088	0.223127
adenoviridae	Cephalophus ogilbyi	Cetartiodactyla	Bovidae	FALSE	0	0.894995	0.314008	0.967071	0.222021	0.812263	0.999779	0.895297	0.968806	0.222045	0.813044	0.999779	0.0103061	0.0055355	0.0129383	0.000740027	0.0259812
adenoviridae	Cephalophus rufilatus	Cetartiodactyla	Bovidae	FALSE	0	0.932946	0.246702	0.960945	0.126701	0.845446	0.998927	0.936103	0.970063	0.125833	0.853344	0.998981	0.0833542	0.0555651	0.0798365	0.0158345	0.186197
adenoviridae	Cephalophus silvicultor	Cetartiodactyla	Bovidae	FALSE	0	0.961104	0.195018	0.990848	0.117718	0.918961	0.999998	0.962196	0.992201	0.117496	0.919893	0.999998	0.0544879	0.0385993	0.0530635	0.0107237	0.116561
adenoviridae	Cephalophus spadix	Cetartiodactyla	Bovidae	FALSE	0	0.704804	0.458214	0.891194	0.387048	1.32291e-08	0.991856	0.705025	0.892614	0.387134	1.32894e-08	0.991897	0.005955	0.0032956	0.00748126	0.000422462	0.0151299
adenoviridae	Cephalophus weynsi	Cetartiodactyla	Bovidae	FALSE	0	0.897339	0.300266	0.9569	0.217434	0.828492	0.998891	0.901407	0.959494	0.217415	0.834576	0.999166	0.0946274	0.0640155	0.088995	0.0182739	0.211256
adenoviridae	Cephalophus zebra	Cetartiodactyla	Bovidae	FALSE	0	0.937204	0.241518	0.976923	0.157332	0.901436	0.999998	0.938028	0.977065	0.157121	0.90243	0.999998	0.0238636	0.0166271	0.0237225	0.00469803	0.0535746
adenoviridae	Ceratotherium simum	Perissodactyla	Rhinocerotidae	FALSE	0	0.955309	0.207084	0.994388	0.0972738	0.862799	0.999999	0.983846	0.997583	0.0299063	0.953627	1	0.442364	0.407896	0.29981	0.0575305	0.878227
adenoviridae	Cercartetus caudatus	Diprotodontia	Burramyidae	FALSE	0	6.12106e-29	0	0	0	0	0	6.12961e-29	0	0	0	0	0.00795245	0.00408754	0.0111245	0.000650159	0.0193227
adenoviridae	Cercartetus concinnus	Diprotodontia	Burramyidae	FALSE	0	0.0997395	0.301196	4.97225e-25	0.280288	0	0.564673	0.0997867	4.98928e-25	0.280415	0	0.564837	0.0096049	0.00509657	0.0133847	0.000787865	0.0230078
adenoviridae	Cercartetus lepidus	Diprotodontia	Burramyidae	FALSE	0	5.37999e-08	0	0	3.29967e-07	0	1.00083e-15	5.42679e-08	0	3.3322e-07	0	1.00339e-15	0.0113632	0.00618329	0.0158051	0.0009379	0.0266281
adenoviridae	Cercartetus nanus	Diprotodontia	Burramyidae	FALSE	0	0.176317	0.380138	2.68667e-18	0.36082	0	0.973975	0.176378	2.71157e-18	0.36089	0	0.974053	0.0128738	0.00704184	0.01788	0.00103947	0.030613
adenoviridae	Cercocebus agilis	Primates	Cercopithecidae	FALSE	0	0.955997	0.212493	0.990295	0.0733747	0.849911	0.999937	0.965891	0.993504	0.0553937	0.874083	0.999951	0.210601	0.200755	0.0702589	0.130121	0.305079
adenoviridae	Cercocebus atys	Primates	Cercopithecidae	FALSE	0	0.940257	0.232796	0.9867	0.0945385	0.808857	0.999939	0.957828	0.990299	0.0676894	0.868269	0.999962	0.29966	0.286759	0.0885814	0.196033	0.423193
adenoviridae	Cercocebus chrysogaster	Primates	Cercopithecidae	FALSE	0	0.936773	0.24061	0.987352	0.0940628	0.78919	0.99987	0.950172	0.989289	0.0738822	0.831016	0.999901	0.216358	0.205848	0.0722822	0.132137	0.316671
adenoviridae	Cercocebus galeritus	Primates	Cercopithecidae	FALSE	0	0.951592	0.21545	0.977938	0.0582087	0.848738	0.999979	0.958892	0.98	0.0491926	0.87439	0.999981	0.146979	0.139634	0.0520585	0.0899714	0.220991
adenoviridae	Cercocebus lunulatus	Primates	Cercopithecidae	FALSE	0	0.883275	0.327401	0.94267	0.166715	0.709302	0.999088	0.884632	0.943372	0.166051	0.717137	0.999095	0.0180066	0.0139174	0.0156466	0.00268114	0.0388028
adenoviridae	Cercocebus sanjei	Primates	Cercopithecidae	FALSE	0	0.878251	0.323906	0.937129	0.203037	0.770263	0.992846	0.879258	0.937885	0.202848	0.776849	0.992864	0.0140772	0.0108782	0.0122702	0.00211361	0.0307464
adenoviridae	Cercocebus torquatus	Primates	Cercopithecidae	FALSE	0	0.960112	0.190712	0.992253	0.0645292	0.872093	0.999843	0.968224	0.993718	0.0509065	0.899402	0.999872	0.19157	0.182594	0.0646631	0.117651	0.276682
adenoviridae	Cercopithecus ascanius	Primates	Cercopithecidae	FALSE	0	0.893619	0.305908	0.991065	0.202852	0.600262	0.999813	0.98421	0.998077	0.0373167	0.96062	0.999961	0.814709	0.825507	0.119583	0.649547	0.963487
adenoviridae	Cercopithecus campbelli	Primates	Cercopithecidae	TRUE	1	1	0	1	0	1	1	0.975801	0.99099	0.033418	0.929124	0.99994	0.20524	0.194985	0.0686897	0.126469	0.29662
adenoviridae	Cercopithecus cephus	Primates	Cercopithecidae	TRUE	1	1	0	1	0	1	1	0.987422	0.998802	0.0342963	0.968914	0.999988	0.36871	0.359543	0.101294	0.243014	0.507613
adenoviridae	Cercopithecus denti	Primates	Cercopithecidae	FALSE	0	0.937896	0.245287	0.975965	0.1039	0.808403	0.999557	0.967292	0.986427	0.0534943	0.91819	0.99974	0.436894	0.426691	0.107118	0.304171	0.584905
adenoviridae	Cercopithecus diana	Primates	Cercopithecidae	TRUE	1	1	0	1	0	1	1	0.970318	0.984876	0.0354937	0.911101	0.999684	0.287276	0.275405	0.0860764	0.186132	0.407353
adenoviridae	Cercopithecus dryas	Primates	Cercopithecidae	FALSE	0	0.932118	0.25582	0.972583	0.103491	0.796048	0.999667	0.936202	0.974428	0.0980684	0.806526	0.99968	0.0661646	0.0611358	0.0258659	0.0373127	0.10205
adenoviridae	Cercopithecus erythrogaster	Primates	Cercopithecidae	FALSE	0	0.962368	0.193357	0.987071	0.0556838	0.873821	0.999889	0.965343	0.987889	0.0511478	0.888293	0.999896	0.0730582	0.068487	0.0278265	0.042461	0.111555
adenoviridae	Cercopithecus erythrotis	Primates	Cercopithecidae	FALSE	0	0.985276	0.122348	0.999318	0.0398058	0.96687	0.999999	0.98998	0.999511	0.0260654	0.976023	0.999999	0.25999	0.24887	0.0805082	0.168391	0.370106
adenoviridae	Cercopithecus hamlyni	Primates	Cercopithecidae	FALSE	0	0.937523	0.243143	0.97476	0.0907251	0.821266	0.999529	0.969121	0.987886	0.0468209	0.917318	0.999716	0.499986	0.491646	0.112816	0.362289	0.654212
adenoviridae	Cercopithecus lowei	Primates	Cercopithecidae	FALSE	0	0.876137	0.333867	0.945178	0.21641	0.745026	0.999415	0.877662	0.945856	0.215659	0.750319	0.999422	0.0198098	0.0151993	0.0172618	0.00281795	0.0426783
adenoviridae	Cercopithecus mitis	Primates	Cercopithecidae	FALSE	0	0.935987	0.244753	0.988652	0.119631	0.831262	0.999858	0.984832	0.996973	0.0293156	0.950808	0.999957	0.737426	0.740683	0.114108	0.585671	0.891112
adenoviridae	Cercopithecus mona	Primates	Cercopithecidae	TRUE	1	1	0	1	0	1	1	0.986329	0.994817	0.0265158	0.965129	0.999965	0.494805	0.486258	0.11268	0.357163	0.648436
adenoviridae	Cercopithecus neglectus	Primates	Cercopithecidae	FALSE	0	0.966126	0.184285	0.988824	0.0462679	0.912059	0.999834	0.986334	0.995011	0.0197449	0.964694	0.999925	0.564811	0.558679	0.113247	0.42131	0.719815
adenoviridae	Cercopithecus nictitans	Primates	Cercopithecidae	TRUE	1	1	0	1	0	1	1	0.978656	0.994454	0.0438967	0.952187	0.999853	0.638584	0.636736	0.113918	0.487274	0.793825
adenoviridae	Cercopithecus petaurista	Primates	Cercopithecidae	FALSE	0	0.950042	0.217117	0.987822	0.122878	0.873709	0.999956	0.954708	0.99034	0.119462	0.883623	0.999961	0.116174	0.108763	0.0438198	0.0683317	0.174901
adenoviridae	Cercopithecus roloway	Primates	Cercopithecidae	FALSE	0	0.930302	0.255988	0.967754	0.116257	0.857343	0.999591	0.934425	0.969306	0.112613	0.866943	0.999608	0.0659135	0.0610146	0.0258012	0.0371247	0.101781
adenoviridae	Cercopithecus sclateri	Primates	Cercopithecidae	FALSE	0	0.970294	0.166962	0.994226	0.0567342	0.911647	0.99996	0.972489	0.994672	0.0526646	0.917967	0.999961	0.0684137	0.0634808	0.0264681	0.0391617	0.105166
adenoviridae	Cerdocyon thous	Carnivora	Canidae	TRUE	1	1	0	1	0	1	1	0.967761	0.987963	0.0465273	0.893011	0.999955	0.788543	0.794454	0.0901514	0.670416	0.904917
adenoviridae	Cerradomys maracajuensis	Rodentia	Cricetidae	FALSE	0	0.281233	0.453018	0.000131417	0.374097	1.49242e-10	0.812271	0.281524	0.000131741	0.374407	1.50541e-10	0.812803	0.00446377	0.00310312	0.00430864	0.000643636	0.00966828
adenoviridae	Cerradomys marinhus	Rodentia	Cricetidae	FALSE	0	0.248197	0.435917	3.21077e-06	0.374899	8.59247e-12	0.859121	0.248384	3.22871e-06	0.375129	8.62369e-12	0.859708	0.00367055	0.00261142	0.00358808	0.000538375	0.00812369
adenoviridae	Cerradomys scotti	Rodentia	Cricetidae	FALSE	0	0.251853	0.433359	4.61874e-06	0.368107	5.79973e-15	0.858559	0.25218	4.63429e-06	0.36852	5.85177e-15	0.859537	0.00626111	0.00436167	0.00607714	0.000881388	0.0136313
adenoviridae	Cerradomys subflavus	Rodentia	Cricetidae	FALSE	0	0.250749	0.433416	5.5244e-06	0.375694	3.78068e-13	0.873818	0.251088	5.59877e-06	0.37613	3.79846e-13	0.874556	0.00717887	0.00498577	0.00701368	0.00100685	0.0155339
adenoviridae	Cervus albirostris	Cetartiodactyla	Cervidae	FALSE	0	0.895165	0.306811	0.91616	0.115106	0.794705	0.987525	0.895841	0.916634	0.114747	0.79586	0.987687	0.0086325	0.00465216	0.0110856	0.000616555	0.0207129
adenoviridae	Cervus canadensis	Cetartiodactyla	Cervidae	TRUE	1	1	0	1	0	1	1	0.984762	0.998727	0.0318184	0.95742	1	0.254285	0.228906	0.147788	0.0940145	0.459416
adenoviridae	Cervus elaphus	Cetartiodactyla	Cervidae	TRUE	1	1	0	1	0	1	1	0.989243	0.999199	0.0317269	0.979586	0.999998	0.853684	0.890705	0.129771	0.676751	0.983435
adenoviridae	Cervus hanglu	Cetartiodactyla	Cervidae	FALSE	0	0.881457	0.319985	0.947471	0.199693	0.761662	0.997281	0.881764	0.947498	0.199583	0.765094	0.997292	0.00609333	0.00329647	0.00784524	0.000465923	0.0145417
adenoviridae	Cervus nippon	Cetartiodactyla	Cervidae	FALSE	0	0.913342	0.288885	0.961615	0.126224	0.74914	0.999922	0.971353	0.991184	0.0423334	0.925745	0.999964	0.621999	0.621916	0.168836	0.403717	0.850892
adenoviridae	Chacodelphys formosa	Didelphimorphia	Didelphidae	FALSE	0	0.0132164	0.121552	0	0.111155	0	1.67805e-08	0.0132185	0	0.111166	0	1.69781e-08	0.00519049	0.00303273	0.00697192	0.000462329	0.0120417
adenoviridae	Chaerephon aloysiisabaudiae	Chiroptera	Molossidae	FALSE	0	0.412945	0.492355	0.291018	0.413958	3.50582e-13	0.937943	0.413388	0.291895	0.414302	3.50958e-13	0.938265	0.00577343	0.00406044	0.00589808	0.000801508	0.0126156
adenoviridae	Chaerephon ansorgei	Chiroptera	Molossidae	FALSE	0	0.552813	0.49674	0.813657	0.43671	2.22676e-16	0.969878	0.553171	0.813764	0.43692	2.25171e-16	0.969992	0.00740704	0.00516555	0.00762914	0.00102301	0.0163646
adenoviridae	Chaerephon atsinanana	Chiroptera	Molossidae	FALSE	0	0.440996	0.496854	0.00542329	0.463101	2.37127e-20	0.993417	0.441112	0.00544748	0.463194	2.38315e-20	0.993445	0.00419105	0.00301842	0.00425627	0.000576161	0.00914637
adenoviridae	Chaerephon bemmeleni	Chiroptera	Molossidae	FALSE	0	0.570809	0.494876	0.83588	0.43505	2.23377e-22	0.979712	0.571125	0.836152	0.435189	2.25654e-22	0.979834	0.00566526	0.00398729	0.00578422	0.000784693	0.0123112
adenoviridae	Chaerephon bivittatus	Chiroptera	Molossidae	FALSE	0	0.611401	0.486924	0.835841	0.393604	4.83015e-07	0.944743	0.611871	0.836126	0.393819	4.84861e-07	0.944979	0.00595662	0.00418455	0.0060912	0.000827144	0.0130843
adenoviridae	Chaerephon bregullae	Chiroptera	Molossidae	FALSE	0	0.187152	0.393951	4.26804e-06	0.325614	3.50337e-24	0.820553	0.187308	4.29302e-06	0.325814	3.50665e-24	0.821866	0.00309285	0.00216318	0.00318079	0.000427114	0.00671919
adenoviridae	Chaerephon chapini	Chiroptera	Molossidae	FALSE	0	0.536341	0.498969	0.818226	0.442052	4.19569e-21	0.981991	0.536684	0.818331	0.442171	4.25815e-21	0.982131	0.0070556	0.00493812	0.00725557	0.000965422	0.0155858
adenoviridae	Chaerephon gallagheri	Chiroptera	Molossidae	FALSE	0	0.251969	0.433359	2.85311e-09	0.375325	0	0.862401	0.252162	2.86012e-09	0.375551	0	0.862756	0.00299328	0.00209559	0.0030886	0.000415222	0.00648791
adenoviridae	Chaerephon jobensis	Chiroptera	Molossidae	FALSE	0	0.406395	0.491123	0.00461166	0.42564	7.69958e-19	0.926338	0.406762	0.0046197	0.425955	7.72285e-19	0.926522	0.00557015	0.00391676	0.00568425	0.000770114	0.0120648
adenoviridae	Chaerephon jobimena	Chiroptera	Molossidae	FALSE	0	0.305052	0.461625	2.52176e-05	0.421679	1.80788e-27	0.943117	0.305193	2.53103e-05	0.421862	1.81636e-27	0.943508	0.00441503	0.00314967	0.00448437	0.000619207	0.00965689
adenoviridae	Chaerephon johorensis	Chiroptera	Molossidae	FALSE	0	0.458551	0.497729	0.584424	0.406321	1.35599e-13	0.949814	0.458833	0.584785	0.406502	1.3598e-13	0.949937	0.00410343	0.00295169	0.00416762	0.000559254	0.00896898
adenoviridae	Chaerephon major	Chiroptera	Molossidae	FALSE	0	0.682435	0.464356	0.86225	0.360028	0.000663326	0.964365	0.682939	0.863245	0.360058	0.000665225	0.964563	0.00512964	0.00362835	0.0052231	0.000704852	0.0111035
adenoviridae	Chaerephon nigeriae	Chiroptera	Molossidae	FALSE	0	0.608539	0.489064	0.888256	0.429161	5.01283e-13	0.981224	0.60893	0.890477	0.429269	5.06399e-13	0.981268	0.00625455	0.00440406	0.00640603	0.000853082	0.0138282
adenoviridae	Chaerephon plicatus	Chiroptera	Molossidae	FALSE	0	0.894906	0.30539	0.933048	0.110202	0.744952	0.997138	0.958932	0.969174	0.0433315	0.900185	0.999017	0.633108	0.654399	0.127449	0.441297	0.780261
adenoviridae	Chaerephon pumilus	Chiroptera	Molossidae	TRUE	1	1	0	1	0	1	1	0.97103	0.985846	0.038232	0.925289	0.999987	0.541687	0.554951	0.120948	0.365237	0.682835
adenoviridae	Chaerephon russatus	Chiroptera	Molossidae	FALSE	0	0.487885	0.499997	0.711056	0.408313	9.19888e-09	0.922274	0.488246	0.711286	0.408559	9.22431e-09	0.922353	0.00423668	0.00304657	0.00430257	0.000585927	0.00924561
adenoviridae	Chaerephon solomonis	Chiroptera	Molossidae	FALSE	0	1.60968e-08	0	0	1.38468e-07	0	1.75798e-22	1.6165e-08	0	1.39055e-07	0	1.76158e-22	0.003037	0.00211888	0.00312893	0.00042003	0.00658514
adenoviridae	Chaerephon tomensis	Chiroptera	Molossidae	FALSE	0	0.17634	0.38377	5.05872e-24	0.345424	0	0.881522	0.176415	5.06387e-24	0.345557	0	0.882018	0.00299395	0.0020959	0.00308922	0.000415302	0.00648941
adenoviridae	Chaetocauda sichuanensis	Rodentia	Gliridae	FALSE	0	0.662444	0.472235	0.827334	0.340826	0.00104279	0.973714	0.663155	0.829081	0.340974	0.00104726	0.973805	0.00736907	0.00531771	0.00731019	0.000934791	0.0161703
adenoviridae	Chaetodipus ammophilus	Rodentia	Heteromyidae	FALSE	0	0.309758	0.463107	1.30752e-06	0.386499	9.63903e-26	0.843565	0.310273	1.32398e-06	0.387061	9.65328e-26	0.844847	0.00632654	0.00463006	0.00610013	0.00098429	0.0132895
adenoviridae	Chaetodipus arenarius	Rodentia	Heteromyidae	FALSE	0	0.30932	0.465621	1.11659e-06	0.385831	1.45744e-26	0.840707	0.309895	1.13221e-06	0.386456	1.4608e-26	0.842115	0.00702064	0.0051131	0.00673176	0.00109105	0.0146203
adenoviridae	Chaetodipus artus	Rodentia	Heteromyidae	FALSE	0	0.432254	0.494962	0.64077	0.395726	1.96152e-09	0.869926	0.432889	0.641825	0.396106	1.9705e-09	0.870099	0.00676951	0.00493299	0.00650023	0.00106301	0.0142789
adenoviridae	Chaetodipus baileyi	Rodentia	Heteromyidae	FALSE	0	0.450701	0.496752	0.701042	0.391594	2.96698e-11	0.876262	0.45144	0.702435	0.392172	2.99489e-11	0.878294	0.00775865	0.00567862	0.00742779	0.00120526	0.0162561
adenoviridae	Chaetodipus californicus	Rodentia	Heteromyidae	FALSE	0	0.419538	0.492426	0.580582	0.389031	6.45645e-14	0.877666	0.420208	0.584617	0.389534	6.49803e-14	0.878295	0.00813023	0.00597504	0.00778532	0.00126167	0.0169911
adenoviridae	Chaetodipus eremicus	Rodentia	Heteromyidae	FALSE	0	0.263285	0.442655	1.33937e-05	0.36555	5.98089e-18	0.816543	0.263743	1.34194e-05	0.366052	6.0102e-18	0.817721	0.00865928	0.00634077	0.00830061	0.00135628	0.0181981
adenoviridae	Chaetodipus fallax	Rodentia	Heteromyidae	FALSE	0	0.367471	0.481848	0.00302417	0.390398	5.81174e-27	0.873133	0.367974	0.0030535	0.390846	5.82114e-27	0.873557	0.00685053	0.00500967	0.00657459	0.00106942	0.0143803
adenoviridae	Chaetodipus formosus	Rodentia	Heteromyidae	FALSE	0	0.385721	0.486118	0.102382	0.397138	4.39367e-14	0.87896	0.386293	0.103491	0.397583	4.50129e-14	0.87917	0.00801543	0.00589826	0.00767443	0.00124003	0.0167861
adenoviridae	Chaetodipus goldmani	Rodentia	Heteromyidae	FALSE	0	0.409389	0.490421	0.425663	0.393241	1.79021e-15	0.859664	0.410029	0.426767	0.393657	1.7992e-15	0.860115	0.00671823	0.00488738	0.00645334	0.00106064	0.0142592
adenoviridae	Chaetodipus hispidus	Rodentia	Heteromyidae	FALSE	0	0.51057	0.499888	0.759162	0.431185	3.67792e-10	0.954713	0.514514	0.769252	0.433521	3.90928e-10	0.956206	0.0577948	0.0483725	0.038557	0.021207	0.106137
adenoviridae	Chaetodipus intermedius	Rodentia	Heteromyidae	FALSE	0	0.285047	0.45222	3.24785e-05	0.380507	1.94047e-26	0.825498	0.285514	3.2855e-05	0.381049	1.99145e-26	0.827837	0.00849106	0.00623437	0.00813606	0.0013297	0.0177839
adenoviridae	Chaetodipus lineatus	Rodentia	Heteromyidae	FALSE	0	0.301336	0.457732	2.86189e-05	0.384393	2.36224e-14	0.838348	0.301645	2.9064e-05	0.384693	2.39634e-14	0.839323	0.00624533	0.00457171	0.00602809	0.000961995	0.0131629
adenoviridae	Chaetodipus nelsoni	Rodentia	Heteromyidae	FALSE	0	0.309002	0.464276	0.000760287	0.380669	1.15852e-13	0.821057	0.309474	0.000781037	0.381117	1.16977e-13	0.821787	0.00861184	0.00630619	0.00825414	0.00135192	0.0180818
adenoviridae	Chaetodipus penicillatus	Rodentia	Heteromyidae	FALSE	0	0.390373	0.488329	0.0608114	0.398572	4.54153e-23	0.850135	0.391061	0.0615151	0.399178	4.55449e-23	0.852385	0.0083235	0.00611689	0.00797278	0.00129774	0.0173774
adenoviridae	Chaetodipus pernix	Rodentia	Heteromyidae	FALSE	0	0.432956	0.494789	0.649216	0.401265	4.03e-13	0.8673	0.433564	0.650254	0.401702	4.04403e-13	0.867429	0.00682146	0.00497888	0.00654787	0.00106689	0.014339
adenoviridae	Chaetodipus rudinoris	Rodentia	Heteromyidae	FALSE	0	0.610117	0.487202	0.797102	0.375352	4.63218e-05	0.963386	0.610858	0.797269	0.375589	4.68968e-05	0.963774	0.0075162	0.00550648	0.00719686	0.0011681	0.0157475
adenoviridae	Chaetodipus siccus	Rodentia	Heteromyidae	FALSE	0	0.309121	0.46278	7.28812e-05	0.386418	3.4435e-24	0.84571	0.309624	7.38882e-05	0.38696	3.47641e-24	0.848058	0.00619517	0.00453397	0.00598382	0.000949864	0.0130886
adenoviridae	Chaetodipus spinatus	Rodentia	Heteromyidae	FALSE	0	0.841209	0.364928	0.904626	0.227472	0.716081	0.995201	0.844732	0.906723	0.226759	0.72408	0.995304	0.0359831	0.0298695	0.026158	0.0125638	0.0697101
adenoviridae	Chaetomys subspinosus	Rodentia	Erethizontidae	FALSE	0	0.455362	0.497786	0.50912	0.440982	8.92904e-15	0.959597	0.455875	0.510174	0.441374	8.96202e-15	0.960168	0.0105142	0.00734889	0.0105298	0.00143828	0.0229812
adenoviridae	Chaetophractus vellerosus	Cingulata	Chlamyphoridae	FALSE	0	0.329674	0.46845	1.3786e-12	0.44792	0	0.998129	0.330883	1.38032e-12	0.448947	0	0.998173	0.0280171	0.0153999	0.0372777	0.00264954	0.0680282
adenoviridae	Chaetophractus villosus	Cingulata	Chlamyphoridae	FALSE	0	0.555984	0.495913	0.830708	0.452559	9.97253e-31	0.999831	0.556471	0.830846	0.452784	1.00765e-30	0.999837	0.013503	0.00780462	0.0162066	0.00111814	0.03187
adenoviridae	Chalinolobus dwyeri	Chiroptera	Vespertilionidae	FALSE	0	0.52917	0.49955	0.732074	0.382713	3.26748e-06	0.9091	0.530082	0.733674	0.383232	3.28848e-06	0.909583	0.0096713	0.00858746	0.00587636	0.00348509	0.0168098
adenoviridae	Chalinolobus gouldii	Chiroptera	Vespertilionidae	TRUE	1	1	0	1	0	1	1	0.96921	0.986417	0.0400107	0.911558	0.999725	0.28902	0.284973	0.0510189	0.226638	0.354936
adenoviridae	Chalinolobus morio	Chiroptera	Vespertilionidae	TRUE	1	1	0	1	0	1	1	0.928873	0.950156	0.0606637	0.851119	0.997836	0.175998	0.171178	0.0366835	0.13215	0.223725
adenoviridae	Chalinolobus neocaledonicus	Chiroptera	Vespertilionidae	FALSE	0	0.193379	0.397808	6.13557e-08	0.360699	2.73732e-32	0.93298	0.193534	6.19917e-08	0.360877	2.75448e-32	0.933243	0.00600504	0.00523488	0.0038583	0.00212304	0.0113295
adenoviridae	Chalinolobus nigrogriseus	Chiroptera	Vespertilionidae	FALSE	0	0.250245	0.436086	3.45901e-05	0.364041	1.54877e-17	0.838092	0.250789	3.49453e-05	0.364748	1.56351e-17	0.83903	0.0103028	0.00916051	0.00625731	0.00364952	0.0179932
adenoviridae	Chalinolobus picatus	Chiroptera	Vespertilionidae	FALSE	0	0.774121	0.41837	0.872755	0.279341	0.156546	0.96388	0.774816	0.87422	0.279417	0.157793	0.964088	0.00808331	0.00717544	0.00495037	0.00293338	0.0145294
adenoviridae	Chalinolobus tuberculatus	Chiroptera	Vespertilionidae	FALSE	0	0.914923	0.276787	0.957754	0.103139	0.761212	0.999825	0.97285	0.9875	0.0377522	0.920265	0.999947	0.734238	0.737445	0.0765349	0.635333	0.830973
adenoviridae	Cheirogaleus andysabini	Primates	Cheirogaleidae	FALSE	0	0.1227	0.330832	2.85539e-17	0.311154	0	0.809546	0.122892	2.92989e-17	0.311498	0	0.812766	0.0310383	0.0244932	0.0234714	0.00828808	0.06505
adenoviridae	Cheirogaleus crossleyi	Primates	Cheirogaleidae	FALSE	0	0.41453	0.49135	4.72156e-05	0.468877	0	0.994761	0.415217	4.75469e-05	0.469423	0	0.994958	0.0393459	0.031427	0.0292492	0.0108567	0.0795197
adenoviridae	Cheirogaleus grovesi	Primates	Cheirogaleidae	FALSE	0	0.309401	0.464076	1.68074e-08	0.435365	0	0.983446	0.309952	1.82732e-08	0.435927	0	0.983778	0.0320004	0.0253138	0.0241169	0.00856147	0.0675673
adenoviridae	Cheirogaleus lavasoensis	Primates	Cheirogaleidae	FALSE	0	0.0713603	0.263391	4.44951e-23	0.239623	0	0.00664765	0.0714991	4.51875e-23	0.23999	0	0.00691254	0.0309966	0.0244616	0.0234436	0.00827282	0.0648835
adenoviridae	Cheirogaleus major	Primates	Cheirogaleidae	FALSE	0	0.208666	0.408443	5.26168e-15	0.382513	0	0.962212	0.209029	5.30954e-15	0.383072	0	0.963088	0.0323588	0.0256581	0.0243595	0.00865164	0.0681092
adenoviridae	Cheirogaleus medius	Primates	Cheirogaleidae	FALSE	0	0.564565	0.49489	0.95987	0.478957	1.01688e-11	0.999859	0.564943	0.960488	0.478997	1.08748e-11	0.999864	0.0322047	0.0254729	0.0242551	0.00862087	0.0678659
adenoviridae	Cheirogaleus sibreei	Primates	Cheirogaleidae	FALSE	0	0.299055	0.46175	7.5392e-09	0.432576	0	0.984235	0.299607	7.73622e-09	0.433057	0	0.984922	0.0310979	0.0245383	0.0235112	0.00830987	0.0652874
adenoviridae	Cheirogaleus thomasi	Primates	Cheirogaleidae	FALSE	0	0.378381	0.483072	7.89454e-06	0.464502	1.30663e-23	0.985525	0.378957	8.27991e-06	0.465097	1.35205e-23	0.985781	0.0309932	0.0244591	0.0234414	0.00827159	0.0648702
adenoviridae	Cheiromeles parvidens	Chiroptera	Molossidae	FALSE	0	0.0230302	0.146683	1.78829e-34	0.132878	0	0.000164332	0.0230497	1.7896e-34	0.132964	0	0.000164433	0.00533128	0.00376319	0.00543376	0.000733459	0.0116612
adenoviridae	Cheiromeles torquatus	Chiroptera	Molossidae	FALSE	0	0.639228	0.480636	0.916796	0.442119	2.16628e-13	0.998422	0.63948	0.917576	0.442239	2.19023e-13	0.998448	0.00794961	0.0055232	0.00820634	0.00108629	0.0177906
adenoviridae	Chelemys macronyx	Rodentia	Cricetidae	FALSE	0	0.0969021	0.299867	1.38396e-10	0.250701	4.89412e-25	0.597661	0.0970463	1.38979e-10	0.251033	4.91784e-25	0.598427	0.00472403	0.00327089	0.00455588	0.000684737	0.0101095
adenoviridae	Chelemys megalonyx	Rodentia	Cricetidae	FALSE	0	0.326028	0.468747	0.000780388	0.376246	4.15106e-16	0.870891	0.326344	0.000783357	0.376527	4.17215e-16	0.871239	0.00433355	0.00302026	0.00418663	0.000625627	0.0094074
adenoviridae	Cheracebus lucifer	Primates	Pitheciidae	FALSE	0	0.163052	0.369457	9.26385e-12	0.338223	0	0.833797	0.163562	9.45175e-12	0.339018	0	0.834641	0.0243544	0.0207544	0.0167098	0.00711589	0.0455543
adenoviridae	Cheracebus lugens	Primates	Pitheciidae	FALSE	0	0.164912	0.364459	8.59358e-11	0.341743	0	0.841532	0.165459	9.25681e-11	0.342613	0	0.843706	0.0326409	0.0280761	0.0226152	0.0091387	0.0623116
adenoviridae	Cheracebus medemi	Primates	Pitheciidae	FALSE	0	0.159218	0.371721	1.68181e-11	0.336143	0	0.831092	0.159634	1.7025e-11	0.336856	0	0.833775	0.0207035	0.0175815	0.0142745	0.00612609	0.0395505
adenoviridae	Cheracebus purinus	Primates	Pitheciidae	FALSE	0	0.160098	0.370548	1.23529e-10	0.335893	8.90192e-39	0.829258	0.160569	1.25491e-10	0.336661	9.47124e-39	0.833876	0.0230374	0.0196115	0.0158121	0.00685759	0.0434951
adenoviridae	Cheracebus regulus	Primates	Pitheciidae	FALSE	0	0.160823	0.364647	2.61085e-11	0.335605	0	0.821579	0.161341	2.66407e-11	0.336423	0	0.825086	0.0244991	0.0208878	0.0168095	0.0071382	0.0457817
adenoviridae	Cheracebus torquatus	Primates	Pitheciidae	FALSE	0	0.171286	0.376071	1.46404e-11	0.343217	2.66768e-38	0.866302	0.171796	1.48635e-11	0.343976	2.8337e-38	0.867061	0.0221642	0.0188619	0.0152278	0.00658416	0.0419101
adenoviridae	Chilomys instans	Rodentia	Cricetidae	FALSE	0	8.89291e-06	0	1.49653e-29	7.56851e-05	0	1.64868e-11	8.92464e-06	1.49891e-29	7.59575e-05	0	1.65896e-11	0.00410908	0.00290966	0.00397937	0.000596138	0.00898912
adenoviridae	Chilonatalus macer	Chiroptera	Natalidae	FALSE	0	0.105478	0.312015	8.16249e-19	0.265702	0	0.713997	0.105547	8.17989e-19	0.265836	0	0.714425	0.0045533	0.00306214	0.00487482	0.000628891	0.0101441
adenoviridae	Chilonatalus micropus	Chiroptera	Natalidae	FALSE	0	0.105809	0.306811	8.61099e-20	0.268397	0	0.658115	0.105858	8.62388e-20	0.268496	0	0.658485	0.00373143	0.0025022	0.00401706	0.000501253	0.00846602
adenoviridae	Chilonatalus tumidifrons	Chiroptera	Natalidae	FALSE	0	0.143447	0.348948	3.81399e-13	0.31136	0	0.805918	0.143528	3.81614e-13	0.311515	0	0.806412	0.00359667	0.00241332	0.00388083	0.000478826	0.00819565
adenoviridae	Chinchilla chinchilla	Rodentia	Chinchillidae	FALSE	0	0.0862631	0.277538	4.82017e-22	0.246408	0	0.34635	0.0863479	4.86626e-22	0.246588	0	0.34709	0.00928846	0.00680888	0.00880655	0.00140559	0.0200652
adenoviridae	Chinchilla lanigera	Rodentia	Chinchillidae	FALSE	0	0.936568	0.244931	0.960936	0.068741	0.835524	0.999933	0.9472	0.9658	0.0576559	0.863447	0.999944	0.171093	0.151822	0.101368	0.0593197	0.307165
adenoviridae	Chinchillula sahamae	Rodentia	Cricetidae	FALSE	0	0.00580676	0.0719233	7.2592e-26	0.0438382	0	1.91768e-07	0.00581131	7.28571e-26	0.0438593	0	1.9297e-07	0.00404969	0.00286599	0.00392525	0.000588241	0.00888579
adenoviridae	Chionomys gud	Rodentia	Cricetidae	FALSE	0	0.706058	0.455138	0.78231	0.291902	0.010484	0.956754	0.706617	0.782735	0.291985	0.0105697	0.956943	0.004429	0.00307952	0.00427594	0.000638207	0.00959836
adenoviridae	Chionomys nivalis	Rodentia	Cricetidae	FALSE	0	0.489563	0.499975	0.687361	0.363113	9.73073e-12	0.846351	0.490339	0.687419	0.363532	9.78462e-12	0.847041	0.00702745	0.00489192	0.00685831	0.00098663	0.0152181
adenoviridae	Chionomys roberti	Rodentia	Cricetidae	FALSE	0	0.692448	0.460745	0.783715	0.268794	0.114185	0.878839	0.69505	0.785709	0.268971	0.116049	0.880838	0.0162604	0.0127198	0.012825	0.00554753	0.0299401
adenoviridae	Chiroderma doriae	Chiroptera	Phyllostomidae	FALSE	0	0.76629	0.422236	0.831017	0.254424	0.363508	0.958345	0.766824	0.832121	0.25444	0.364236	0.958467	0.00527098	0.00400416	0.00463399	0.00086149	0.0115051
adenoviridae	Chiroderma improvisum	Chiroptera	Phyllostomidae	FALSE	0	0.0487627	0.21524	1.40543e-30	0.185462	0	0.000706691	0.0487889	1.40795e-30	0.185529	0	0.000708413	0.00231914	0.00169361	0.00214077	0.000371236	0.00521842
adenoviridae	Chiroderma salvini	Chiroptera	Phyllostomidae	FALSE	0	0.568374	0.495585	0.761002	0.356368	2.17877e-07	0.879586	0.568779	0.762372	0.356559	2.19456e-07	0.879647	0.00489652	0.0037004	0.00430162	0.000798232	0.0107168
adenoviridae	Chiroderma trinitatum	Chiroptera	Phyllostomidae	FALSE	0	0.586468	0.493477	0.785357	0.363479	2.59676e-07	0.887365	0.586892	0.786259	0.363693	2.61271e-07	0.887646	0.00593461	0.00456951	0.00522679	0.000962635	0.0131858
adenoviridae	Chiroderma villosum	Chiroptera	Phyllostomidae	FALSE	0	0.604873	0.490814	0.787385	0.354166	1.99523e-06	0.892665	0.605343	0.787511	0.354388	2.00952e-06	0.892993	0.0059946	0.00462184	0.00528055	0.000973013	0.0133433
adenoviridae	Chiromyscus chiropus	Rodentia	Muridae	FALSE	0	0.839639	0.364741	0.884057	0.175724	0.747915	0.95556	0.841662	0.885295	0.175327	0.752186	0.956092	0.0220918	0.0203163	0.00991198	0.0112242	0.0349165
adenoviridae	Chironax melanocephalus	Chiroptera	Pteropodidae	FALSE	0	0.637624	0.479707	0.824779	0.389837	6.66293e-06	0.992925	0.638026	0.825049	0.389943	6.7564e-06	0.992932	0.00446247	0.00316193	0.00435017	0.00063183	0.01008
adenoviridae	Chiropodomys calamianensis	Rodentia	Muridae	FALSE	0	0.065889	0.2417	1.4425e-15	0.208918	1.6789e-37	0.102617	0.0660733	1.46403e-15	0.209352	1.70006e-37	0.103024	0.0136401	0.0127433	0.00578953	0.00737234	0.021211
adenoviridae	Chiropodomys gliroides	Rodentia	Muridae	FALSE	0	0.447082	0.49731	0.635943	0.427011	1.60537e-11	0.966294	0.448835	0.647211	0.428026	1.66041e-11	0.967096	0.0303453	0.0274709	0.0145337	0.0147776	0.0489172
adenoviridae	Chiropodomys karlkoopmani	Rodentia	Muridae	FALSE	0	0.0730298	0.251058	4.62771e-16	0.220548	0	0.169735	0.0732194	4.64972e-16	0.221015	0	0.171178	0.0136254	0.0127282	0.00578388	0.00736943	0.0211569
adenoviridae	Chiropodomys major	Rodentia	Muridae	FALSE	0	0.0793117	0.268486	1.86032e-15	0.246784	0	0.171206	0.0794536	1.89859e-15	0.246946	0	0.174047	0.018108	0.0167049	0.00781386	0.00943802	0.0279705
adenoviridae	Chiropodomys muroides	Rodentia	Muridae	FALSE	0	0.0604252	0.238595	3.47132e-16	0.216165	5.6936e-33	0.0344992	0.0605032	3.5241e-16	0.216291	5.74213e-33	0.0350261	0.0133827	0.0125042	0.00569224	0.0072688	0.0207266
adenoviridae	Chiropodomys pusillus	Rodentia	Muridae	FALSE	0	0.131469	0.340974	1.54063e-11	0.312932	5.16077e-37	0.821249	0.131882	1.57375e-11	0.31357	5.30965e-37	0.824552	0.0314526	0.028382	0.015163	0.0152124	0.0508178
adenoviridae	Chiropotes albinasus	Primates	Pitheciidae	FALSE	0	0.686178	0.468784	0.852719	0.361255	1.26948e-06	0.985219	0.688772	0.857244	0.361761	1.34847e-06	0.985755	0.0287136	0.0246304	0.019779	0.00812051	0.0545488
adenoviridae	Chiropotes chiropotes	Primates	Pitheciidae	FALSE	0	0.700629	0.462411	0.878639	0.360447	2.1957e-07	0.982224	0.704058	0.883068	0.361105	2.28766e-07	0.983386	0.0408496	0.0348343	0.0285983	0.0111947	0.0783269
adenoviridae	Chiropotes sagulatus	Primates	Pitheciidae	FALSE	0	0.718188	0.449341	0.879857	0.350265	1.34307e-06	0.985024	0.721273	0.881452	0.350628	1.37117e-06	0.98583	0.0373931	0.0321574	0.0260786	0.010436	0.0721181
adenoviridae	Chiropotes satanas	Primates	Pitheciidae	FALSE	0	0.710836	0.452503	0.872344	0.360592	5.13872e-05	0.983558	0.712731	0.873529	0.360711	5.2014e-05	0.983922	0.0225976	0.019263	0.0155166	0.00671355	0.0426225
adenoviridae	Chiropotes utahickae	Primates	Pitheciidae	FALSE	0	0.711771	0.449195	0.88914	0.35949	4.05938e-07	0.989016	0.713668	0.890215	0.35971	4.14952e-07	0.989226	0.0231707	0.0197153	0.0159021	0.00689237	0.0438016
adenoviridae	Chiruromys forbesi	Rodentia	Muridae	FALSE	0	0.0256989	0.157035	1.10018e-19	0.125924	0	3.2572e-06	0.0257896	1.11064e-19	0.126287	0	3.30185e-06	0.0137202	0.0128343	0.00582037	0.0073891	0.0213578
adenoviridae	Chiruromys lamia	Rodentia	Muridae	FALSE	0	0.0130488	0.115403	3.24761e-38	0.0960308	0	2.25503e-08	0.0130879	3.28725e-38	0.0962152	0	2.27742e-08	0.013765	0.0128681	0.00583776	0.00741429	0.0214211
adenoviridae	Chiruromys vates	Rodentia	Muridae	FALSE	0	4.83378e-06	0	0	4.15811e-05	0	2.77812e-18	4.91862e-06	0	4.23109e-05	0	2.81891e-18	0.0145019	0.0134776	0.00613477	0.00777155	0.0224743
adenoviridae	Chlamyphorus truncatus	Cingulata	Chlamyphoridae	FALSE	0	0.0232668	0.156429	0	0.1421	0	3.57866e-19	0.0233052	0	0.142296	0	3.60756e-19	0.00854052	0.00493819	0.0105058	0.000712282	0.0196188
adenoviridae	Chlorocebus aethiops	Primates	Cercopithecidae	FALSE	0	0.916845	0.276486	0.993698	0.157949	0.729751	0.999999	0.983421	0.998533	0.0319371	0.941113	1	0.762152	0.769169	0.143522	0.569685	0.949283
adenoviridae	Chlorocebus cynosuros	Primates	Cercopithecidae	FALSE	0	0.939756	0.240063	0.97831	0.0844773	0.822655	0.999999	0.965876	0.987479	0.0467728	0.895129	1	0.434917	0.424528	0.106931	0.302019	0.58249
adenoviridae	Chlorocebus djamdjamensis	Primates	Cercopithecidae	FALSE	0	0.803119	0.399775	0.784135	0.0933684	0.682768	0.963433	0.814337	0.796733	0.0886031	0.703938	0.966644	0.0686789	0.0637463	0.0265417	0.0393764	0.105369
adenoviridae	Chlorocebus pygerythrus	Primates	Cercopithecidae	TRUE	1	1	0	1	0	1	1	0.994079	0.999079	0.0116441	0.983044	1	0.823008	0.833701	0.115537	0.663955	0.965743
adenoviridae	Chlorocebus sabaeus	Primates	Cercopithecidae	TRUE	1	1	0	1	0	1	1	0.989242	0.998311	0.0185701	0.964315	0.999999	0.757973	0.761259	0.133824	0.575286	0.933047
adenoviridae	Chlorocebus tantalus	Primates	Cercopithecidae	FALSE	0	0.973607	0.164973	0.995909	0.0491044	0.921836	0.999997	0.985874	0.998137	0.0251361	0.951293	0.999999	0.44344	0.434451	0.107721	0.309372	0.592841
adenoviridae	Chlorotalpa duthieae	Afrosoricida	Chrysochloridae	FALSE	0	9.99146e-11	0	0	8.59498e-10	0	0	1.00171e-10	0	8.61701e-10	0	0	0.00689249	0.003946	0.00932241	0.000522491	0.0171233
adenoviridae	Chlorotalpa sclateri	Afrosoricida	Chrysochloridae	FALSE	0	3.02782e-14	0	0	2.60463e-13	0	0	3.0361e-14	0	2.61175e-13	0	0	0.00733011	0.0041923	0.009961	0.000562974	0.0181205
adenoviridae	Chodsigoa caovansunga	Eulipotyphla	Soricidae	FALSE	0	0.586072	0.492911	0.704388	0.278773	0.00400858	0.810479	0.58717	0.707902	0.279122	0.00402955	0.811207	0.00629276	0.00414007	0.00732639	0.00140046	0.0124639
adenoviridae	Chodsigoa hypsibia	Eulipotyphla	Soricidae	FALSE	0	0.75707	0.433646	0.80752	0.239495	0.533838	0.978401	0.759709	0.810402	0.239581	0.536478	0.978571	0.0186429	0.010526	0.025641	0.0035595	0.0401234
adenoviridae	Chodsigoa lamula	Eulipotyphla	Soricidae	FALSE	0	0.744156	0.43836	0.793583	0.246455	0.398798	0.967749	0.744766	0.794057	0.246472	0.399376	0.967785	0.00469871	0.00350202	0.00475916	0.0010443	0.00946361
adenoviridae	Chodsigoa parca	Eulipotyphla	Soricidae	FALSE	0	0.711647	0.455184	0.746813	0.190916	0.560229	0.846099	0.712972	0.748967	0.19104	0.563278	0.847798	0.00788448	0.00583691	0.00779641	0.00175218	0.016062
adenoviridae	Chodsigoa parva	Eulipotyphla	Soricidae	FALSE	0	0.671313	0.468524	0.747073	0.241463	0.27001	0.848751	0.672045	0.747206	0.241587	0.270806	0.849575	0.00429132	0.00314659	0.00439762	0.000940449	0.0085651
adenoviridae	Chodsigoa salenskii	Eulipotyphla	Soricidae	FALSE	0	0.571003	0.494948	0.717246	0.347489	8.50647e-07	0.925112	0.571531	0.717548	0.347683	8.52935e-07	0.925293	0.004295	0.00314923	0.00440084	0.000940765	0.00857003
adenoviridae	Chodsigoa smithii	Eulipotyphla	Soricidae	FALSE	0	0.880344	0.326939	0.881393	0.0851964	0.753273	0.994974	0.892558	0.898231	0.0779678	0.782394	0.996084	0.110126	0.0641904	0.128692	0.0087278	0.27629
adenoviridae	Chodsigoa sodalis	Eulipotyphla	Soricidae	FALSE	0	0.218408	0.408725	1.46581e-06	0.325724	5.58709e-27	0.759605	0.218787	1.46878e-06	0.32618	5.62224e-27	0.760865	0.00480734	0.00357619	0.00485731	0.00107196	0.00969887
adenoviridae	Choeroniscus godmani	Chiroptera	Phyllostomidae	FALSE	0	0.56281	0.49545	0.81391	0.432355	2.99432e-09	0.975987	0.562954	0.814222	0.432437	3.02612e-09	0.976116	0.00468545	0.00354485	0.00411519	0.00076045	0.0101833
adenoviridae	Choeroniscus minor	Chiroptera	Phyllostomidae	FALSE	0	0.553138	0.497729	0.838362	0.43616	1.1109e-07	0.969557	0.553298	0.838493	0.436256	1.1205e-07	0.969583	0.0053435	0.00406501	0.00469856	0.000870771	0.0116979
adenoviridae	Choeroniscus periosus	Chiroptera	Phyllostomidae	FALSE	0	0.184553	0.382513	2.02651e-07	0.333165	6.18809e-23	0.811883	0.184613	2.02784e-07	0.33325	6.19791e-23	0.812056	0.0026585	0.00196447	0.00239961	0.000426738	0.00583371
adenoviridae	Choeronycteris mexicana	Chiroptera	Phyllostomidae	FALSE	0	0.775831	0.421345	0.883805	0.30897	0.00446718	0.999034	0.776066	0.883913	0.308987	0.00450775	0.999044	0.00429608	0.00323688	0.00377352	0.000703108	0.00924275
adenoviridae	Choloepus didactylus	Pilosa	Megalonychidae	FALSE	0	0.965022	0.185791	0.995188	0.0550726	0.897132	1	0.96844	0.99613	0.0531527	0.904787	1	0.142388	0.0571855	0.185516	0.00767069	0.4332
adenoviridae	Choloepus hoffmanni	Pilosa	Megalonychidae	FALSE	0	0.94066	0.233365	0.997488	0.166733	0.849278	1	0.944161	0.997547	0.165468	0.88164	1	0.0956137	0.0347402	0.14313	0.00496489	0.271801
adenoviridae	Chrotogale owstoni	Carnivora	Viverridae	FALSE	0	0.780144	0.409147	0.83637	0.243244	0.467218	0.982193	0.786741	0.84207	0.243038	0.494565	0.98342	0.067809	0.0589347	0.0459935	0.0156261	0.12759
adenoviridae	Chrotomys gonzalesi	Rodentia	Muridae	FALSE	0	2.09204e-05	0	0	0.00017557	0	1.02441e-14	2.12538e-05	0	0.000178416	0	1.03342e-14	0.0133478	0.0124839	0.00567925	0.00724875	0.0206823
adenoviridae	Chrotomys mindorensis	Rodentia	Muridae	FALSE	0	0.000245567	0.0173179	0	0.00197155	0	1.84421e-14	0.000249557	0	0.00200472	0	1.86489e-14	0.0141573	0.0131423	0.00599333	0.00756607	0.0219985
adenoviridae	Chrotomys sibuyanensis	Rodentia	Muridae	FALSE	0	0.00173921	0.0360321	1.02332e-33	0.0148999	0	1.331e-10	0.00176368	1.04657e-33	0.01511	0	1.33661e-10	0.0133474	0.0124836	0.0056791	0.00724844	0.0206818
adenoviridae	Chrotomys silaceus	Rodentia	Muridae	FALSE	0	2.15169e-08	0	0	1.85095e-07	0	2.89819e-33	2.16771e-08	0	1.86473e-07	0	2.91343e-33	0.0134287	0.0125389	0.0057094	0.00729111	0.0207785
adenoviridae	Chrotomys whiteheadi	Rodentia	Muridae	FALSE	0	4.21712e-05	0	0	0.000343447	0	6.98532e-19	4.25104e-05	0	0.000346049	0	7.00942e-19	0.0136523	0.0127583	0.00579421	0.00737475	0.0212528
adenoviridae	Chrotopterus auritus	Chiroptera	Phyllostomidae	FALSE	0	0.624821	0.485949	0.898505	0.436413	1.62759e-10	0.999006	0.628086	0.905003	0.437882	1.74824e-10	0.999078	0.0794421	0.0763244	0.025369	0.0498384	0.11198
adenoviridae	Chrysochloris asiatica	Afrosoricida	Chrysochloridae	FALSE	0	0.00421446	0.0555913	0	0.0362538	0	2.40302e-34	0.00425034	0	0.0365624	0	2.42334e-34	0.00758072	0.00439227	0.0103292	0.000585071	0.0187043
adenoviridae	Chrysochloris stuhlmanni	Afrosoricida	Chrysochloridae	FALSE	0	0.0133029	0.121153	0	0.114367	0	1.41988e-21	0.013303	0	0.114367	0	1.43976e-21	0.00905617	0.00529058	0.0125139	0.000682361	0.0220795
adenoviridae	Chrysochloris visagiei	Afrosoricida	Chrysochloridae	FALSE	0	0.0004496	0.0299865	0	0.00386757	0	1.31491e-37	0.000454367	0	0.00390858	0	1.3165e-37	0.00669686	0.00382909	0.00903938	0.000508115	0.0167
adenoviridae	Chrysocyon brachyurus	Carnivora	Canidae	TRUE	1	1	0	1	0	1	1	0.975824	0.992417	0.0365033	0.923663	1	0.593482	0.595265	0.120171	0.437585	0.743328
adenoviridae	Chrysospalax trevelyani	Afrosoricida	Chrysochloridae	FALSE	0	0.0954532	0.297044	2.20525e-36	0.280527	0	0.26562	0.0954666	2.2092e-36	0.28055	0	0.265798	0.00702137	0.00399125	0.00950978	0.000532304	0.0174339
adenoviridae	Chrysospalax villosus	Afrosoricida	Chrysochloridae	FALSE	0	0.000594067	0.0244875	0	0.00511036	0	3.75905e-39	0.000595561	0	0.00512321	0	3.86318e-39	0.00706931	0.00401077	0.00957963	0.000537862	0.017559
adenoviridae	Cistugo lesueuri	Chiroptera	Cistugidae	FALSE	0	0.251078	0.432897	2.87647e-06	0.40102	2.20184e-24	0.936835	0.251154	2.91206e-06	0.401111	2.20552e-24	0.937108	0.00406181	0.00267213	0.00439435	0.000585475	0.0096082
adenoviridae	Cistugo seabrae	Chiroptera	Cistugidae	FALSE	0	0.219347	0.412134	6.64969e-09	0.387742	4.07162e-32	0.956975	0.219407	6.6867e-09	0.387821	4.08406e-32	0.957168	0.0046266	0.00303864	0.00501484	0.000678118	0.0108086
adenoviridae	Civettictis civetta	Carnivora	Viverridae	FALSE	0	0.96725	0.173588	0.999619	0.12231	0.928492	0.999992	0.970608	0.999683	0.119528	0.941678	0.999994	0.236027	0.224496	0.140581	0.0585029	0.42825
adenoviridae	Cloeotis percivali	Chiroptera	Hipposideridae	FALSE	0	0.682115	0.465934	0.850684	0.357994	0.00263137	0.987397	0.682503	0.85118	0.358001	0.00264378	0.98746	0.00501301	0.00348483	0.00514153	0.000739509	0.0112908
adenoviridae	Clyomys laticeps	Rodentia	Echimyidae	FALSE	0	3.97251e-06	0	0	2.81404e-05	0	7.91273e-16	4.00238e-06	0	2.83375e-05	0	7.99991e-16	0.0114519	0.00805827	0.0114886	0.0017885	0.0249988
adenoviridae	Coccymys ruemmleri	Rodentia	Muridae	FALSE	0	0.0115098	0.111102	0	0.0982834	0	2.60367e-13	0.0115261	0	0.0984155	0	2.6423e-13	0.0135644	0.0126762	0.00576061	0.0073574	0.0210231
adenoviridae	Coelops frithii	Chiroptera	Hipposideridae	FALSE	0	0.921479	0.276937	0.937409	0.064452	0.829539	0.986151	0.922016	0.937749	0.0639661	0.830352	0.986267	0.00875923	0.00592138	0.00915682	0.00122035	0.0197404
adenoviridae	Coelops robinsoni	Chiroptera	Hipposideridae	FALSE	0	0.462115	0.498592	0.580254	0.436439	9.90627e-12	0.960975	0.462338	0.580515	0.436596	9.92762e-12	0.961238	0.00413495	0.00292569	0.00423288	0.00059558	0.00928894
adenoviridae	Coendou baturitensis	Rodentia	Erethizontidae	FALSE	0	0.644658	0.480406	0.915494	0.433627	6.68155e-07	0.998357	0.644967	0.916295	0.433756	6.83805e-07	0.998365	0.00790173	0.00564683	0.00796073	0.00104764	0.0174093
adenoviridae	Coendou bicolor	Rodentia	Erethizontidae	FALSE	0	0.349531	0.476048	4.68069e-05	0.437692	4.64464e-17	0.96852	0.349855	4.79616e-05	0.438013	4.74677e-17	0.968679	0.0120976	0.00843158	0.0121475	0.00165599	0.0261913
adenoviridae	Coendou ichillus	Rodentia	Erethizontidae	FALSE	0	0.105432	0.305649	5.73471e-10	0.27573	3.93777e-29	0.748511	0.105557	5.82747e-10	0.276008	3.98803e-29	0.750345	0.00873254	0.00620017	0.00875687	0.00117282	0.0190075
adenoviridae	Coendou insidiosus	Rodentia	Erethizontidae	FALSE	0	0.477815	0.499747	0.691346	0.452759	4.12279e-13	0.995395	0.478236	0.694892	0.45299	4.13569e-13	0.995481	0.0112818	0.00783322	0.0113107	0.00156334	0.0246232
adenoviridae	Coendou melanurus	Rodentia	Erethizontidae	FALSE	0	0.315852	0.464356	3.43678e-05	0.428933	5.1429e-16	0.989791	0.317163	3.72147e-05	0.429999	5.57803e-16	0.990044	0.0389186	0.0326932	0.0256803	0.0141896	0.0735475
adenoviridae	Coendou mexicanus	Rodentia	Erethizontidae	FALSE	0	0.531709	0.499	0.779001	0.451959	7.76615e-10	0.998738	0.533376	0.787878	0.45279	7.92868e-10	0.998783	0.0329806	0.0275771	0.0219057	0.0120355	0.0616605
adenoviridae	Coendou nycthemera	Rodentia	Erethizontidae	FALSE	0	0.325307	0.468599	7.35076e-05	0.42475	1.3109e-15	0.94392	0.325561	7.65743e-05	0.425023	1.33828e-15	0.944018	0.0100223	0.00702497	0.0100338	0.0013665	0.0218618
adenoviridae	Coendou prehensilis	Rodentia	Erethizontidae	FALSE	0	0.831473	0.371721	0.970671	0.327734	0.001433	0.999768	0.834624	0.971816	0.327472	0.00169674	0.999789	0.0907536	0.0769462	0.0565861	0.0356827	0.168196
adenoviridae	Coendou pruinosus	Rodentia	Erethizontidae	FALSE	0	0.146085	0.355496	4.04697e-08	0.311806	7.86681e-30	0.823124	0.146283	4.04972e-08	0.31217	7.97025e-30	0.824335	0.00926961	0.00650504	0.00928364	0.00127158	0.0202058
adenoviridae	Coendou quichua	Rodentia	Erethizontidae	FALSE	0	0.32023	0.466322	6.76238e-05	0.423364	6.25076e-17	0.961523	0.32138	7.16238e-05	0.424569	6.55269e-17	0.962755	0.0307617	0.0256753	0.020514	0.0112804	0.0573582
adenoviridae	Coendou roosmalenorum	Rodentia	Erethizontidae	FALSE	0	0.162842	0.369639	7.8821e-11	0.340502	1.06904e-32	0.887413	0.162966	8.17208e-11	0.340731	1.08127e-32	0.888001	0.00861422	0.00613847	0.00864197	0.00115453	0.0187903
adenoviridae	Coendou rufescens	Rodentia	Erethizontidae	FALSE	0	0.130439	0.339358	2.04e-10	0.297318	1.08765e-36	0.764459	0.13062	2.04167e-10	0.29768	1.09579e-36	0.766861	0.00988288	0.00694575	0.00989393	0.0013526	0.0215641
adenoviridae	Coendou spinosus	Rodentia	Erethizontidae	FALSE	0	0.693983	0.458823	0.904311	0.391308	8.34826e-07	0.992243	0.696379	0.90624	0.391773	8.76165e-07	0.992574	0.0393432	0.0330288	0.0259515	0.0143666	0.0741259
adenoviridae	Coendou vestitus	Rodentia	Erethizontidae	FALSE	0	0.14346	0.349664	3.0235e-08	0.303869	3.3903e-29	0.74477	0.143658	3.02925e-08	0.304238	3.43246e-29	0.746135	0.00791006	0.00565213	0.00796858	0.00104904	0.0174249
adenoviridae	Coleura afra	Chiroptera	Emballonuridae	TRUE	1	1	0	1	0	1	1	0.968977	0.981461	0.0403674	0.920912	0.999909	0.85326	0.876113	0.0897764	0.726542	0.945582
adenoviridae	Coleura kibomalandy	Chiroptera	Emballonuridae	FALSE	0	0.51371	0.499936	0.757977	0.428149	6.70903e-11	0.982781	0.516384	0.762768	0.429408	7.13604e-11	0.983513	0.0372861	0.0351758	0.0140651	0.0211077	0.0552366
adenoviridae	Coleura seychellensis	Chiroptera	Emballonuridae	FALSE	0	0.492634	0.499921	0.597945	0.440952	2.47832e-13	0.990113	0.492858	0.599023	0.441036	2.48594e-13	0.990226	0.00335336	0.00220977	0.00356223	0.000449845	0.0073624
adenoviridae	Colobus angolensis	Primates	Cercopithecidae	FALSE	0	0.919345	0.266274	0.972582	0.134363	0.785419	0.999161	0.935796	0.981217	0.124403	0.836542	0.999435	0.24584	0.236172	0.0802428	0.151019	0.354518
adenoviridae	Colobus guereza	Primates	Cercopithecidae	TRUE	1	1	0	1	0	1	1	0.98684	0.996342	0.0223092	0.964499	0.999964	0.722719	0.725681	0.117678	0.567901	0.881779
adenoviridae	Colobus polykomos	Primates	Cercopithecidae	TRUE	1	1	0	1	0	1	1	0.969702	0.984792	0.0441806	0.937141	0.99997	0.406623	0.396984	0.104034	0.282431	0.549452
adenoviridae	Colobus satanas	Primates	Cercopithecidae	FALSE	0	0.929326	0.255484	0.969009	0.13657	0.819425	0.99977	0.930539	0.969729	0.135827	0.821241	0.99978	0.0254093	0.0193707	0.0223695	0.00357888	0.0537926
adenoviridae	Colobus vellerosus	Primates	Cercopithecidae	FALSE	0	0.895897	0.301593	0.969568	0.201507	0.791777	0.999438	0.897177	0.969767	0.201107	0.794147	0.99945	0.0211268	0.0162772	0.0184548	0.00291161	0.0453501
adenoviridae	Condylura cristata	Eulipotyphla	Talpidae	FALSE	0	0.204712	0.400375	8.66536e-16	0.369419	0	0.90961	0.204857	8.76809e-16	0.36964	0	0.909743	0.00904266	0.0056402	0.0111883	0.00097436	0.0206048
adenoviridae	Conepatus chinga	Carnivora	Mephitidae	FALSE	0	0.624349	0.486877	0.862052	0.429415	6.13698e-11	0.998611	0.625603	0.865514	0.429836	6.24703e-11	0.998661	0.0284088	0.01977	0.0276941	0.00478969	0.0633633
adenoviridae	Conepatus humboldtii	Carnivora	Mephitidae	FALSE	0	0.384035	0.486807	0.00653649	0.454228	1.18748e-19	0.992408	0.384323	0.00667332	0.454471	1.25225e-19	0.9926	0.0159884	0.0111715	0.0159158	0.00262815	0.0354597
adenoviridae	Conepatus leuconotus	Carnivora	Mephitidae	TRUE	1	1	0	1	0	1	1	0.873467	0.90355	0.110057	0.724548	0.993053	0.0247342	0.0171958	0.0242122	0.00409734	0.0551985
adenoviridae	Conepatus semistriatus	Carnivora	Mephitidae	FALSE	0	0.496148	0.499997	0.696477	0.445651	9.2614e-12	0.993798	0.496908	0.701933	0.446131	9.67092e-12	0.993859	0.0248936	0.0173064	0.0243638	0.00412001	0.0554712
adenoviridae	Congosorex phillipsorum	Eulipotyphla	Soricidae	FALSE	0	0.104957	0.307197	6.44631e-14	0.252244	2.66919e-34	0.681529	0.105089	6.48466e-14	0.252497	2.67715e-34	0.681926	0.00429041	0.00314594	0.00439682	0.000940371	0.00856388
adenoviridae	Congosorex polli	Eulipotyphla	Soricidae	FALSE	0	0.0392035	0.198522	1.93041e-19	0.151374	0	0.00360403	0.0392576	1.93792e-19	0.151543	0	0.00360755	0.00429111	0.00314644	0.00439744	0.000940431	0.00856482
adenoviridae	Congosorex verheyeni	Eulipotyphla	Soricidae	FALSE	0	0.0348252	0.18629	3.61887e-15	0.131174	1.00029e-31	0.00490184	0.0348919	3.63616e-15	0.131411	1.0048e-31	0.00490784	0.00542462	0.00403713	0.00542605	0.00119619	0.0109873
adenoviridae	Conilurus penicillatus	Rodentia	Muridae	FALSE	0	0.184609	0.386256	1.65144e-08	0.322722	3.46531e-25	0.79978	0.185088	1.66397e-08	0.32337	3.4976e-25	0.800992	0.0135265	0.0126347	0.00574621	0.00734012	0.0209827
adenoviridae	Connochaetes gnou	Cetartiodactyla	Bovidae	FALSE	0	0.927117	0.268014	0.976209	0.14889	0.811879	0.998891	0.939001	0.978779	0.140071	0.87148	0.999033	0.221988	0.183267	0.163097	0.0467368	0.452408
adenoviridae	Connochaetes taurinus	Cetartiodactyla	Bovidae	FALSE	0	0.871569	0.331737	0.956807	0.186331	0.659391	0.999401	0.946043	0.975012	0.122327	0.89132	0.99949	0.562076	0.602572	0.256983	0.172525	0.871332
adenoviridae	Cormura brevirostris	Chiroptera	Emballonuridae	FALSE	0	0.490979	0.499931	0.713425	0.434757	2.8406e-12	0.950265	0.491585	0.713732	0.435177	2.86956e-12	0.950347	0.00878597	0.00613962	0.00923363	0.00109858	0.0198381
adenoviridae	Corynorhinus mexicanus	Chiroptera	Vespertilionidae	FALSE	0	0.886451	0.321777	0.934934	0.156494	0.778374	0.992352	0.887045	0.935242	0.156272	0.779109	0.992405	0.00818838	0.00728319	0.00500983	0.00295948	0.0146617
adenoviridae	Corynorhinus rafinesquii	Chiroptera	Vespertilionidae	TRUE	1	1	0	1	0	1	1	0.822751	0.823005	0.0621754	0.744402	0.90342	0.00935115	0.00832768	0.00568558	0.00337414	0.0163571
adenoviridae	Corynorhinus townsendii	Chiroptera	Vespertilionidae	FALSE	0	0.936992	0.242603	0.953804	0.0599828	0.846825	0.995955	0.942299	0.957303	0.0549999	0.858299	0.996328	0.0910234	0.0887706	0.0216841	0.066067	0.118896
adenoviridae	Craseonycteris thonglongyai	Chiroptera	Craseonycteridae	FALSE	0	0.558624	0.496459	0.770459	0.380094	3.17814e-08	0.942276	0.558949	0.770666	0.38023	3.18524e-08	0.942511	0.00398519	0.00266974	0.00457127	0.000553052	0.00866408
adenoviridae	Crateromys australis	Rodentia	Muridae	FALSE	0	0.0110012	0.10477	1.58679e-34	0.0941025	0	9.65964e-11	0.0110159	1.59631e-34	0.0942267	0	9.79524e-11	0.0133473	0.0124836	0.00567907	0.00724838	0.0206817
adenoviridae	Crateromys heaneyi	Rodentia	Muridae	FALSE	0	0.137041	0.336193	1.83577e-07	0.288931	1.07657e-34	0.745579	0.137372	1.85138e-07	0.289507	1.09063e-34	0.747946	0.0140953	0.0131067	0.00596831	0.00752619	0.0218993
adenoviridae	Crateromys paulus	Rodentia	Muridae	FALSE	0	3.62163e-09	0	0	2.95971e-08	0	1.40414e-16	3.63412e-09	0	2.96971e-08	0	1.41658e-16	0.0133472	0.0124835	0.00567902	0.00724828	0.0206815
adenoviridae	Crateromys schadenbergi	Rodentia	Muridae	FALSE	0	4.1558e-07	0	0	3.11625e-06	0	1.53772e-14	4.17352e-07	0	3.1299e-06	0	1.55279e-14	0.0133962	0.0125137	0.00569724	0.00727532	0.0207436
adenoviridae	Cratogeomys castanops	Rodentia	Geomyidae	FALSE	0	0.206481	0.403702	8.83815e-14	0.368311	0	0.867834	0.206686	8.92e-14	0.368628	0	0.868385	0.00958257	0.00667901	0.00930395	0.00142265	0.0207807
adenoviridae	Cratogeomys fulvescens	Rodentia	Geomyidae	FALSE	0	0.0411217	0.195489	4.82957e-35	0.168129	0	4.56757e-05	0.0411778	4.838e-35	0.168317	0	4.62331e-05	0.00713183	0.00495274	0.00714263	0.0010471	0.0150986
adenoviridae	Cratogeomys fumosus	Rodentia	Geomyidae	FALSE	0	0.0257615	0.158837	9.84747e-37	0.133297	0	9.70944e-06	0.0257971	9.87465e-37	0.133454	0	9.74227e-06	0.00756998	0.0052665	0.00750921	0.00113007	0.0164749
adenoviridae	Cratogeomys goldmani	Rodentia	Geomyidae	FALSE	0	0.190712	0.394107	3.85265e-17	0.355532	0	0.859414	0.19093	3.85415e-17	0.355899	0	0.860645	0.00819982	0.0056898	0.00805393	0.00124895	0.0181635
adenoviridae	Cratogeomys merriami	Rodentia	Geomyidae	FALSE	0	0.0271864	0.160322	2.91844e-35	0.128775	0	1.64235e-06	0.0272334	2.92229e-35	0.12896	0	1.65005e-06	0.00718299	0.00500948	0.00718483	0.00105888	0.0152907
adenoviridae	Cratogeomys perotensis	Rodentia	Geomyidae	FALSE	0	0.0329445	0.176	1.22002e-37	0.148927	0	7.78655e-08	0.0329908	1.23403e-37	0.149093	0	7.85994e-08	0.00715855	0.00498296	0.00716465	0.0010543	0.0151883
adenoviridae	Cratogeomys planiceps	Rodentia	Geomyidae	FALSE	0	0.0236391	0.151799	8.92497e-38	0.119141	0	5.31193e-07	0.0236804	8.98387e-38	0.119344	0	5.36756e-07	0.00714506	0.0049677	0.00715353	0.00105066	0.015143
adenoviridae	Cremnomys cutchicus	Rodentia	Muridae	FALSE	0	0.811299	0.391588	0.91914	0.288016	0.306618	0.986114	0.812324	0.920025	0.288085	0.308308	0.986341	0.0185455	0.0171604	0.00803539	0.00967039	0.0287151
adenoviridae	Cremnomys elvira	Rodentia	Muridae	FALSE	0	0.164346	0.370457	1.04072e-08	0.325832	2.03442e-22	0.856234	0.164678	1.04955e-08	0.326328	2.0674e-22	0.857328	0.0133472	0.0124835	0.00567903	0.0072483	0.0206815
adenoviridae	Cricetomys ansorgei	Rodentia	Nesomyidae	FALSE	0	0.950982	0.214399	0.972856	0.0564876	0.856312	0.999253	0.952981	0.974539	0.0545132	0.861315	0.99929	0.0461124	0.0381335	0.0290434	0.0189507	0.085909
adenoviridae	Cricetomys emini	Rodentia	Nesomyidae	TRUE	1	1	0	1	0	1	1	0.967215	0.982693	0.0397048	0.904199	0.99947	0.0863335	0.0733443	0.054072	0.033603	0.161544
adenoviridae	Cricetomys gambianus	Rodentia	Nesomyidae	FALSE	0	0.94957	0.220405	0.96992	0.0588044	0.864305	0.99957	0.965493	0.982156	0.0416395	0.904509	0.999766	0.318371	0.303893	0.139413	0.152087	0.50975
adenoviridae	Cricetulus alticola	Rodentia	Cricetidae	FALSE	0	0.203592	0.402159	1.22101e-08	0.343959	2.24257e-26	0.820635	0.203726	1.22864e-08	0.344148	2.24872e-26	0.821205	0.00382447	0.00271905	0.0037231	0.000562348	0.00839716
adenoviridae	Cricetulus barabensis	Rodentia	Cricetidae	TRUE	1	1	0	1	0	1	1	0.943752	0.962091	0.0556359	0.855774	0.998576	0.643795	0.688743	0.214899	0.321597	0.893152
adenoviridae	Cricetulus kamensis	Rodentia	Cricetidae	FALSE	0	0.380681	0.486548	0.393267	0.381975	6.98672e-19	0.855926	0.381005	0.394769	0.382237	7.07177e-19	0.856808	0.00385455	0.00273971	0.00374979	0.000566032	0.00844296
adenoviridae	Cricetulus lama	Rodentia	Cricetidae	FALSE	0	0.325164	0.467243	0.114079	0.3606	2.44697e-20	0.812426	0.325498	0.114139	0.360901	2.45705e-20	0.812528	0.00367131	0.0026121	0.00358875	0.000538476	0.00812636
adenoviridae	Cricetulus longicaudatus	Rodentia	Cricetidae	FALSE	0	0.809197	0.393638	0.81386	0.129914	0.714803	0.938458	0.816115	0.817157	0.12791	0.720745	0.941317	0.0446027	0.0345426	0.0336014	0.0157782	0.0861455
adenoviridae	Cricetulus migratorius	Rodentia	Cricetidae	FALSE	0	0.886451	0.316348	0.958468	0.20403	0.777498	0.998157	0.895772	0.962588	0.19965	0.818309	0.998558	0.151108	0.127022	0.0934588	0.0598366	0.279834
adenoviridae	Cricetulus sokolovi	Rodentia	Cricetidae	FALSE	0	0.770085	0.420833	0.784921	0.1263	0.696185	0.87482	0.772888	0.786467	0.125937	0.700261	0.875495	0.0156403	0.0123135	0.0124608	0.00531496	0.0288661
adenoviridae	Cricetulus tibetanus	Rodentia	Cricetidae	FALSE	0	0.167198	0.375984	6.76619e-11	0.308808	1.77244e-35	0.734056	0.16734	6.77405e-11	0.309005	1.77807e-35	0.734597	0.00369908	0.00263708	0.0036129	0.000542125	0.00815033
adenoviridae	Cricetus cricetus	Rodentia	Cricetidae	FALSE	1	1	0	1	0	1	1	0.925549	0.941995	0.062515	0.829473	0.997472	0.049047	0.0380603	0.0364195	0.0175382	0.0956092
adenoviridae	Crocidura afeworkbekelei	Eulipotyphla	Soricidae	FALSE	0	2.13047e-07	0	0	1.69242e-06	0	1.16268e-13	2.14073e-07	0	1.70098e-06	0	1.16345e-13	0.00441769	0.00325771	0.00450856	0.000974938	0.00888445
adenoviridae	Crocidura aleksandrisi	Eulipotyphla	Soricidae	FALSE	0	0.01125	0.114556	2.33624e-33	0.0719142	0	3.14797e-08	0.0112806	2.34344e-33	0.0721092	0	3.15909e-08	0.00441173	0.00325223	0.00450331	0.000973557	0.00886558
adenoviridae	Crocidura allex	Eulipotyphla	Soricidae	FALSE	0	0.0149757	0.133674	3.80778e-19	0.0957276	0	5.40634e-07	0.0150151	3.81396e-19	0.0959379	0	5.41245e-07	0.00466464	0.00347201	0.00472852	0.00103828	0.0094039
adenoviridae	Crocidura andamanensis	Eulipotyphla	Soricidae	FALSE	0	0.0962456	0.2928	9.46212e-13	0.232657	4.9765e-38	0.603682	0.0964505	9.54916e-13	0.23314	5.00888e-38	0.60402	0.00429199	0.00314707	0.0043982	0.000940506	0.008566
adenoviridae	Crocidura ansellorum	Eulipotyphla	Soricidae	FALSE	0	0.00919648	0.0944405	1.60886e-36	0.0790513	0	3.64353e-12	0.00921401	1.61e-36	0.0792019	0	3.66933e-12	0.00429594	0.0031499	0.00440165	0.000940845	0.00857128
adenoviridae	Crocidura arabica	Eulipotyphla	Soricidae	FALSE	0	0.0104159	0.104302	3.09275e-23	0.0831324	0	0.000267434	0.0104336	3.09786e-23	0.0832728	0	0.000268202	0.00429482	0.0031491	0.00440067	0.000940749	0.00856978
adenoviridae	Crocidura arispa	Eulipotyphla	Soricidae	FALSE	0	0.230721	0.420704	3.67304e-05	0.333018	2.42903e-21	0.747065	0.230952	3.67503e-05	0.333224	2.43085e-21	0.747522	0.00430054	0.00315321	0.00440568	0.000941241	0.00857745
adenoviridae	Crocidura armenica	Eulipotyphla	Soricidae	FALSE	0	0.108622	0.310633	3.13116e-10	0.243667	9.44555e-32	0.526158	0.108755	3.14115e-10	0.243835	9.48458e-32	0.527145	0.0042922	0.00314722	0.00439838	0.000940524	0.00856628
adenoviridae	Crocidura attenuata	Eulipotyphla	Soricidae	FALSE	0	0.742371	0.437589	0.76036	0.135941	0.571818	0.899003	0.833094	0.82823	0.0887759	0.731584	0.952385	0.354954	0.334545	0.236222	0.049242	0.695221
adenoviridae	Crocidura attila	Eulipotyphla	Soricidae	FALSE	0	0.433022	0.49577	0.52207	0.334691	1.09877e-08	0.780984	0.433838	0.52506	0.335174	1.11319e-08	0.781996	0.00745389	0.00557006	0.00737463	0.0016475	0.0152239
adenoviridae	Crocidura baileyi	Eulipotyphla	Soricidae	FALSE	0	0.0165734	0.128145	2.30837e-17	0.0943336	0	0.000183869	0.0165931	2.32278e-17	0.0944221	0	0.000184895	0.00456445	0.00337816	0.00463881	0.00101165	0.0091985
adenoviridae	Crocidura baluensis	Eulipotyphla	Soricidae	FALSE	0	9.4461e-05	0	0	0.000812458	0	7.26981e-14	9.47728e-05	0	0.000815139	0	7.2967e-14	0.00431888	0.00316693	0.00442172	0.000944711	0.00860201
adenoviridae	Crocidura batesi	Eulipotyphla	Soricidae	FALSE	0	0.170759	0.373154	0.00069169	0.278841	7.75959e-16	0.712532	0.171282	0.000692907	0.279567	7.80761e-16	0.717261	0.00833925	0.00617919	0.00824349	0.00186101	0.0168385
adenoviridae	Crocidura beatus	Eulipotyphla	Soricidae	FALSE	0	6.02127e-10	0	0	5.17969e-09	0	1.82115e-28	6.02483e-10	0	5.18275e-09	0	1.86094e-28	0.00464762	0.00345815	0.00471324	0.00103565	0.00937976
adenoviridae	Crocidura beccarii	Eulipotyphla	Soricidae	FALSE	0	0.00506497	0.0739578	7.38685e-37	0.0434854	0	1.05712e-09	0.00507489	7.44536e-37	0.0435705	0	1.0643e-09	0.0056809	0.00421862	0.00566667	0.00125901	0.0114173
adenoviridae	Crocidura bottegi	Eulipotyphla	Soricidae	FALSE	0	4.14652e-07	0	0	3.43152e-06	0	3.78275e-15	4.14938e-07	0	3.43346e-06	0	3.78758e-15	0.00444499	0.00327788	0.00453268	0.000981269	0.00894892
adenoviridae	Crocidura bottegoides	Eulipotyphla	Soricidae	FALSE	0	7.71301e-07	0	0	6.39521e-06	0	1.47533e-15	7.75616e-07	0	6.43167e-06	0	1.48505e-15	0.00479099	0.0035652	0.00484249	0.00106863	0.00965095
adenoviridae	Crocidura brunnea	Eulipotyphla	Soricidae	FALSE	0	0.0503816	0.21545	4.30965e-15	0.172933	0	0.0138607	0.0504709	4.31457e-15	0.173177	0	0.0139101	0.00466852	0.00347504	0.004732	0.00103889	0.00941178
adenoviridae	Crocidura buettikoferi	Eulipotyphla	Soricidae	FALSE	0	0.163466	0.367992	0.000138215	0.268883	7.38449e-18	0.674844	0.163721	0.000139222	0.269247	7.45299e-18	0.675338	0.00473332	0.00352258	0.00479036	0.00105331	0.00952054
adenoviridae	Crocidura caliginea	Eulipotyphla	Soricidae	FALSE	0	0.0828739	0.276787	7.78245e-10	0.221088	3.28643e-34	0.5291	0.0830032	7.84528e-10	0.2214	3.31698e-34	0.529512	0.00522606	0.00388368	0.00524129	0.00114514	0.0106482
adenoviridae	Crocidura canariensis	Eulipotyphla	Soricidae	FALSE	0	0.0407157	0.194308	2.43864e-18	0.15139	0	0.0113285	0.040798	2.4403e-18	0.151636	0	0.0114109	0.00429348	0.00314814	0.0043995	0.000940634	0.00856799
adenoviridae	Crocidura caspica	Eulipotyphla	Soricidae	FALSE	0	0.127867	0.327055	1.27727e-07	0.252941	1.05623e-23	0.560302	0.127999	1.28081e-07	0.253125	1.06515e-23	0.561131	0.00430911	0.00315935	0.00441317	0.000942813	0.00858892
adenoviridae	Crocidura cinderella	Eulipotyphla	Soricidae	FALSE	0	0.00851242	0.0868461	7.2651e-32	0.073198	0	4.93628e-09	0.00853713	7.325e-32	0.0734104	0	4.97368e-09	0.00589659	0.00438949	0.0058708	0.00131572	0.0117771
adenoviridae	Crocidura congobelgica	Eulipotyphla	Soricidae	FALSE	0	0.0799482	0.268486	3.89925e-10	0.213455	7.31692e-33	0.503834	0.0800929	3.90523e-10	0.21379	7.36698e-33	0.50529	0.0055672	0.00413862	0.00555964	0.00123322	0.0111938
adenoviridae	Crocidura cranbrooki	Eulipotyphla	Soricidae	FALSE	0	0.832384	0.377988	0.826481	0.0909919	0.721127	0.952089	0.832859	0.827093	0.090945	0.721436	0.952782	0.00433446	0.00318124	0.00443536	0.00095046	0.00864591
adenoviridae	Crocidura crenata	Eulipotyphla	Soricidae	FALSE	0	0.0359348	0.185541	1.70512e-16	0.137512	9.25464e-39	0.0180345	0.03603	1.71113e-16	0.137793	9.2956e-39	0.0181445	0.00828671	0.00613665	0.00819177	0.00184976	0.0167595
adenoviridae	Crocidura crossei	Eulipotyphla	Soricidae	FALSE	0	0.0444615	0.204203	1.31916e-10	0.13882	1.175e-27	0.137899	0.044635	1.33336e-10	0.139241	1.19092e-27	0.139442	0.00903192	0.00668173	0.00892665	0.00201624	0.0183124
adenoviridae	Crocidura cyanea	Eulipotyphla	Soricidae	FALSE	0	0.0281804	0.169203	7.23065e-22	0.125102	0	0.000291725	0.0282903	7.26743e-22	0.125544	0	0.000293464	0.00978415	0.00725646	0.00967032	0.00217092	0.0198669
adenoviridae	Crocidura denti	Eulipotyphla	Soricidae	FALSE	0	0.0433005	0.198522	1.88809e-13	0.154656	3.64092e-33	0.00490381	0.0434743	1.90739e-13	0.155296	3.69079e-33	0.00491372	0.0085516	0.00634529	0.00845268	0.0019065	0.0172105
adenoviridae	Crocidura desperata	Eulipotyphla	Soricidae	FALSE	0	0.0368862	0.184033	2.57563e-19	0.153664	2.16788e-36	0.00238083	0.0369398	2.57748e-19	0.153882	2.17424e-36	0.00238647	0.00437657	0.00321993	0.00447234	0.000965489	0.00875359
adenoviridae	Crocidura dhofarensis	Eulipotyphla	Soricidae	FALSE	0	0.00905321	0.0933946	1.62548e-34	0.0778095	0	1.02911e-10	0.00907103	1.63128e-34	0.0779628	0	1.0338e-10	0.00429037	0.00314591	0.00439679	0.000940367	0.00856382
adenoviridae	Crocidura dolichura	Eulipotyphla	Soricidae	FALSE	0	0.0450473	0.210781	1.28313e-13	0.156811	5.53154e-37	0.00211238	0.0452506	1.31326e-13	0.157546	5.80668e-37	0.00212158	0.0102121	0.00757073	0.0100938	0.0022397	0.0206917
adenoviridae	Crocidura douceti	Eulipotyphla	Soricidae	FALSE	0	0.0876218	0.284599	6.13368e-09	0.216898	1.66382e-25	0.356921	0.0879104	6.16178e-09	0.217532	1.68504e-25	0.358033	0.00807179	0.00533285	0.00924868	0.00179599	0.0163628
adenoviridae	Crocidura dsinezumi	Eulipotyphla	Soricidae	FALSE	0	0.759819	0.429612	0.833929	0.240933	0.421903	0.973973	0.760963	0.834273	0.240866	0.424932	0.974067	0.0090519	0.00669487	0.00894639	0.00202054	0.0183576
adenoviridae	Crocidura eburnea	Eulipotyphla	Soricidae	FALSE	0	0.165174	0.37738	7.66574e-06	0.28401	1.20592e-17	0.695013	0.165545	7.66954e-06	0.284447	1.20654e-17	0.695485	0.00643994	0.0047915	0.0063904	0.00142993	0.0130363
adenoviridae	Crocidura eisentrauti	Eulipotyphla	Soricidae	FALSE	0	0.391067	0.489022	0.425482	0.369344	3.01357e-11	0.857373	0.391533	0.426908	0.369622	3.02064e-11	0.857652	0.00431907	0.00316711	0.00442188	0.000944748	0.00860227
adenoviridae	Crocidura elgonius	Eulipotyphla	Soricidae	FALSE	0	0.0116027	0.107077	7.94826e-31	0.0803803	0	1.68125e-09	0.0116409	7.9515e-31	0.0805953	0	1.68598e-09	0.00531842	0.00395765	0.00532704	0.00116512	0.0108083
adenoviridae	Crocidura elongata	Eulipotyphla	Soricidae	FALSE	0	7.90566e-05	0	0	0.000673763	0	6.58908e-19	7.96985e-05	0	0.000679278	0	6.60637e-19	0.00653131	0.00486987	0.00647842	0.00145255	0.0132629
adenoviridae	Crocidura erica	Eulipotyphla	Soricidae	FALSE	0	0.0118787	0.107532	1.66812e-28	0.0843399	0	1.24672e-09	0.0119032	1.684e-28	0.0844975	0	1.24897e-09	0.00447475	0.00329868	0.00455903	0.000988171	0.0090106
adenoviridae	Crocidura fingui	Eulipotyphla	Soricidae	FALSE	0	0.0556041	0.234498	1.62329e-21	0.180632	0	0.122939	0.0556959	1.63398e-21	0.180765	0	0.124532	0.00429026	0.00314583	0.00439669	0.000940358	0.00856368
adenoviridae	Crocidura fischeri	Eulipotyphla	Soricidae	FALSE	0	0.0112488	0.10662	8.48096e-21	0.0829017	0	2.24045e-05	0.0112766	8.48677e-21	0.0830595	0	2.25042e-05	0.00432492	0.00317247	0.004427	0.000946086	0.0086136
adenoviridae	Crocidura flavescens	Eulipotyphla	Soricidae	FALSE	0	0.773	0.423246	0.79208	0.169251	0.68781	0.928527	0.774234	0.793652	0.169257	0.692867	0.929	0.00848346	0.00563478	0.00970451	0.00187735	0.0172737
adenoviridae	Crocidura floweri	Eulipotyphla	Soricidae	FALSE	0	0.0108263	0.103833	1.19768e-28	0.0824617	0	2.24558e-08	0.0108476	1.20341e-28	0.0826095	0	2.25689e-08	0.00433794	0.00318444	0.00443842	0.000952394	0.00865668
adenoviridae	Crocidura foetida	Eulipotyphla	Soricidae	FALSE	0	0.0118452	0.116242	2.441e-25	0.0793251	0	1.73266e-07	0.0118734	2.48575e-25	0.0794681	0	1.74552e-07	0.00999112	0.00741726	0.00987511	0.0022063	0.0203055
adenoviridae	Crocidura foxi	Eulipotyphla	Soricidae	FALSE	0	0.551346	0.497341	0.648482	0.327772	2.1048e-06	0.928923	0.552323	0.650618	0.328075	2.12017e-06	0.930561	0.00764661	0.00569706	0.00756319	0.00169254	0.0156134
adenoviridae	Crocidura fuliginosa	Eulipotyphla	Soricidae	TRUE	1	1	0	1	0	1	1	0.794025	0.777942	0.118403	0.642748	0.954184	0.0114965	0.00850113	0.0113646	0.00246484	0.023239
adenoviridae	Crocidura fulvastra	Eulipotyphla	Soricidae	FALSE	0	0.00934348	0.0985087	4.28087e-27	0.0756444	0	7.47458e-08	0.00938066	4.33575e-27	0.075922	0	7.49911e-08	0.00817822	0.00605692	0.00808501	0.00182526	0.0165689
adenoviridae	Crocidura fumosa	Eulipotyphla	Soricidae	FALSE	0	0.0252013	0.165259	1.26165e-13	0.116951	9.07375e-28	0.00917913	0.025243	1.28931e-13	0.117136	9.16049e-28	0.00919175	0.00465122	0.00346108	0.00471647	0.0010362	0.00938679
adenoviridae	Crocidura fuscomurina	Eulipotyphla	Soricidae	FALSE	0	0.0183023	0.127388	2.14542e-30	0.109724	0	4.96749e-07	0.0183839	2.17116e-30	0.110169	0	4.99265e-07	0.0113066	0.00837124	0.0111768	0.0024166	0.0229078
adenoviridae	Crocidura glassi	Eulipotyphla	Soricidae	FALSE	0	1.64105e-06	0	0	1.26744e-05	0	1.40258e-12	1.64975e-06	0	1.27464e-05	0	1.41039e-12	0.00478778	0.00356306	0.00483959	0.00106777	0.00964156
adenoviridae	Crocidura gmelini	Eulipotyphla	Soricidae	FALSE	0	0.009003	0.0923366	1.73258e-27	0.0578606	0	1.38109e-09	0.00903324	1.73656e-27	0.0579877	0	1.39059e-09	0.008195	0.00606544	0.00810153	0.00182915	0.0165966
adenoviridae	Crocidura goliath	Eulipotyphla	Soricidae	FALSE	0	0.914861	0.28846	0.936782	0.0793387	0.812018	0.994144	0.921581	0.946973	0.0734516	0.814971	0.99454	0.0751807	0.0345666	0.0993615	0.00830788	0.195294
adenoviridae	Crocidura grandiceps	Eulipotyphla	Soricidae	FALSE	0	0.779672	0.417385	0.791612	0.229937	0.6247	0.985664	0.780952	0.799532	0.22989	0.625818	0.986063	0.00985786	0.00552599	0.0142117	0.00182782	0.0202986
adenoviridae	Crocidura grandis	Eulipotyphla	Soricidae	FALSE	0	1.09105e-09	0	0	9.38559e-09	0	9.00078e-28	1.09164e-09	0	9.39066e-09	0	9.1959e-28	0.00429318	0.00314793	0.00439924	0.000940609	0.00856759
adenoviridae	Crocidura grassei	Eulipotyphla	Soricidae	FALSE	0	0.0476943	0.20818	1.29964e-14	0.153273	1.40638e-34	0.100542	0.0478364	1.31469e-14	0.153578	1.41532e-34	0.101314	0.00719645	0.00533935	0.00712336	0.00160146	0.0146831
adenoviridae	Crocidura grayi	Eulipotyphla	Soricidae	FALSE	0	2.19335e-10	0	0	1.88645e-09	0	9.55583e-30	2.19462e-10	0	1.88754e-09	0	9.61474e-30	0.00456119	0.00337423	0.0046359	0.00101067	0.00919149
adenoviridae	Crocidura greenwoodi	Eulipotyphla	Soricidae	FALSE	0	0.0113453	0.102409	4.28771e-31	0.0823953	0	7.41166e-10	0.0113694	4.30013e-31	0.082555	0	7.4625e-10	0.00452525	0.00334691	0.00460388	0.00100011	0.00911412
adenoviridae	Crocidura harenna	Eulipotyphla	Soricidae	FALSE	0	2.79393e-07	0	0	2.02124e-06	0	1.09354e-13	2.80617e-07	0	2.03097e-06	0	1.09492e-13	0.00429449	0.00314887	0.00440039	0.000940721	0.00856934
adenoviridae	Crocidura hikmiya	Eulipotyphla	Soricidae	FALSE	0	1.91814e-06	0	0	1.38642e-05	0	1.06689e-21	1.91912e-06	0	1.38716e-05	0	1.07265e-21	0.00429021	0.0031458	0.00439665	0.000940354	0.00856362
adenoviridae	Crocidura hildegardeae	Eulipotyphla	Soricidae	FALSE	0	0.0232193	0.147981	6.42281e-16	0.116665	3.01273e-34	0.00031416	0.0233056	6.56039e-16	0.117044	3.03455e-34	0.000318848	0.0111636	0.00826686	0.0110354	0.00238631	0.0226579
adenoviridae	Crocidura hilliana	Eulipotyphla	Soricidae	FALSE	0	0.0654418	0.246173	4.1767e-16	0.174438	0	0.259106	0.0655432	4.18428e-16	0.174689	0	0.259358	0.00436375	0.00320876	0.00446107	0.00096263	0.00871096
adenoviridae	Crocidura hirta	Eulipotyphla	Soricidae	FALSE	0	0.875062	0.322253	0.888685	0.0946454	0.749901	0.991879	0.886858	0.894804	0.0834554	0.777638	0.99235	0.0806636	0.037298	0.104772	0.00902156	0.210913
adenoviridae	Crocidura hispida	Eulipotyphla	Soricidae	FALSE	0	0.0350955	0.181999	6.48317e-21	0.150599	0	0.00251451	0.0351435	6.49245e-21	0.150741	0	0.00252276	0.00429022	0.0031458	0.00439666	0.000940354	0.00856362
adenoviridae	Crocidura horsfieldii	Eulipotyphla	Soricidae	FALSE	0	2.96602e-07	0	0	2.12248e-06	0	1.46856e-20	2.96864e-07	0	2.12376e-06	0	1.47335e-20	0.00462614	0.00343994	0.00469397	0.00102967	0.00934511
adenoviridae	Crocidura hutanis	Eulipotyphla	Soricidae	FALSE	0	1.41867e-07	0	0	1.21365e-06	0	2.11928e-26	1.4198e-07	0	1.21458e-06	0	2.16759e-26	0.00593944	0.00442291	0.00591152	0.00133086	0.0118586
adenoviridae	Crocidura indochinensis	Eulipotyphla	Soricidae	FALSE	0	0.109154	0.307325	9.95564e-13	0.240541	5.33771e-37	0.554269	0.109359	1.00171e-12	0.2409	5.56681e-37	0.55505	0.00797321	0.00589753	0.00788352	0.00177443	0.0162171
adenoviridae	Crocidura jacksoni	Eulipotyphla	Soricidae	FALSE	0	0.00868729	0.0885302	4.81047e-29	0.0744748	0	1.25081e-08	0.00872198	4.81562e-29	0.0747705	0	1.26248e-08	0.00868384	0.00643842	0.00858308	0.00193602	0.0175111
adenoviridae	Crocidura jenkinsi	Eulipotyphla	Soricidae	FALSE	0	0.107444	0.306037	6.35587e-09	0.240972	6.90845e-37	0.630129	0.107659	6.40189e-09	0.241448	6.97206e-37	0.631497	0.00429322	0.00314795	0.00439928	0.000940612	0.00856764
adenoviridae	Crocidura jouvenetae	Eulipotyphla	Soricidae	FALSE	0	0.158967	0.367992	1.21746e-05	0.284004	7.23503e-19	0.71681	0.159325	1.2367e-05	0.28445	7.26005e-19	0.718407	0.00664297	0.00495543	0.00658619	0.00147769	0.0135363
adenoviridae	Crocidura katinka	Eulipotyphla	Soricidae	FALSE	0	0.00352112	0.0623281	4.91902e-38	0.0300431	0	5.51712e-10	0.00353976	4.9358e-38	0.0302024	0	5.54939e-10	0.00517301	0.00385103	0.00519218	0.00113703	0.0105537
adenoviridae	Crocidura kivuana	Eulipotyphla	Soricidae	FALSE	0	0.386128	0.487432	0.316941	0.372313	2.45018e-12	0.860956	0.386541	0.317736	0.372562	2.45411e-12	0.861275	0.00439929	0.0032408	0.00449234	0.000970672	0.00882615
adenoviridae	Crocidura lamottei	Eulipotyphla	Soricidae	FALSE	0	0.269596	0.445704	0.0196456	0.321703	5.78134e-15	0.753546	0.270463	0.0198588	0.32236	5.7935e-15	0.755337	0.00840422	0.00623585	0.00830747	0.00187492	0.0169521
adenoviridae	Crocidura lanosa	Eulipotyphla	Soricidae	FALSE	0	0.0189208	0.141025	1.90768e-19	0.106121	0	4.57796e-05	0.0189543	1.91204e-19	0.106275	0	4.5856e-05	0.00454964	0.00336658	0.0046256	0.00100717	0.00916661
adenoviridae	Crocidura lasiura	Eulipotyphla	Soricidae	FALSE	0	0.905403	0.291968	0.942143	0.0921043	0.758314	0.995812	0.906934	0.944728	0.0916376	0.760054	0.99584	0.0231696	0.0111692	0.0348307	0.00356668	0.0528307
adenoviridae	Crocidura latona	Eulipotyphla	Soricidae	FALSE	0	0.0835147	0.273907	6.80816e-09	0.221585	8.07679e-33	0.549709	0.0836642	6.85448e-09	0.221937	8.11398e-33	0.550276	0.00607187	0.00451703	0.00603765	0.00135735	0.0121664
adenoviridae	Crocidura lea	Eulipotyphla	Soricidae	FALSE	0	4.74148e-07	0	0	4.07877e-06	0	4.69439e-34	4.74546e-07	0	4.0822e-06	0	4.70622e-34	0.00642395	0.00477962	0.00637502	0.00142575	0.0129966
adenoviridae	Crocidura lepidura	Eulipotyphla	Soricidae	FALSE	0	0.0100383	0.099005	1.58864e-30	0.0654585	0	5.82801e-07	0.010063	1.59102e-30	0.0655828	0	5.83769e-07	0.00627259	0.00468008	0.00622965	0.00138763	0.0126421
adenoviridae	Crocidura leucodon	Eulipotyphla	Soricidae	FALSE	0	0.924989	0.263391	0.965777	0.126699	0.832931	0.999383	0.926866	0.967913	0.126024	0.834538	0.999426	0.0328193	0.016129	0.0471835	0.00512904	0.0760945
adenoviridae	Crocidura levicula	Eulipotyphla	Soricidae	FALSE	0	7.56649e-07	0	0	6.5089e-06	0	2.95609e-29	7.57168e-07	0	6.51336e-06	0	2.96841e-29	0.00533091	0.00396544	0.00533866	0.00116877	0.0108296
adenoviridae	Crocidura littoralis	Eulipotyphla	Soricidae	FALSE	0	0.687383	0.463835	0.760455	0.241626	0.315882	0.864952	0.689502	0.761728	0.242105	0.317203	0.865763	0.0147017	0.00990596	0.0166546	0.00316308	0.0304666
adenoviridae	Crocidura longipes	Eulipotyphla	Soricidae	FALSE	0	0.221436	0.410614	0.00407134	0.314363	1.08173e-16	0.729525	0.221727	0.00407903	0.314707	1.09731e-16	0.730209	0.00429149	0.00314672	0.00439777	0.000940464	0.00856533
adenoviridae	Crocidura lucina	Eulipotyphla	Soricidae	FALSE	0	7.31655e-08	0	0	4.03514e-07	0	2.08183e-14	7.33764e-08	0	4.04594e-07	0	2.08625e-14	0.00471383	0.0035121	0.00477278	0.00104824	0.00948848
adenoviridae	Crocidura ludia	Eulipotyphla	Soricidae	FALSE	0	0.121925	0.326011	1.26199e-07	0.262997	5.95027e-24	0.662445	0.122143	1.26609e-07	0.263339	6.00876e-24	0.664227	0.00625252	0.00466623	0.0062104	0.00138449	0.0125832
adenoviridae	Crocidura luna	Eulipotyphla	Soricidae	FALSE	0	0.874222	0.332973	0.882335	0.0857785	0.754639	0.984729	0.876337	0.884985	0.0842712	0.762902	0.985209	0.0188449	0.0106202	0.0258969	0.00357965	0.0405591
adenoviridae	Crocidura lusitania	Eulipotyphla	Soricidae	FALSE	0	0.00750877	0.0862772	0	0.0645793	0	2.75135e-19	0.00752446	0	0.0647142	0	2.75419e-19	0.00621041	0.00463082	0.00617007	0.00137982	0.0124746
adenoviridae	Crocidura macarthuri	Eulipotyphla	Soricidae	FALSE	0	0.0112912	0.104302	3.47402e-30	0.0813718	0	6.38023e-07	0.0113207	3.5138e-30	0.0816014	0	6.42846e-07	0.00712516	0.00528551	0.00705394	0.00158556	0.0145367
adenoviridae	Crocidura macmillani	Eulipotyphla	Soricidae	FALSE	0	0.0100472	0.10193	1.64974e-25	0.0786817	0	3.85938e-06	0.0100692	1.65148e-25	0.078841	0	3.88631e-06	0.00450083	0.00331724	0.00458218	0.000994222	0.00906314
adenoviridae	Crocidura macowi	Eulipotyphla	Soricidae	FALSE	0	0.0160174	0.127008	2.08018e-21	0.0967704	0	2.43302e-08	0.0160525	2.08165e-21	0.0969815	0	2.48145e-08	0.00429191	0.00314702	0.00439814	0.0009405	0.00856589
adenoviridae	Crocidura malayana	Eulipotyphla	Soricidae	FALSE	0	0.0433611	0.193118	5.54602e-14	0.17105	0	0.00935971	0.0434557	5.59128e-14	0.17128	0	0.00944686	0.00724039	0.00537549	0.0071662	0.00161153	0.0147733
adenoviridae	Crocidura manengubae	Eulipotyphla	Soricidae	FALSE	0	0.0185374	0.131859	3.43696e-19	0.0889601	0	6.35764e-05	0.0185695	3.45746e-19	0.0890501	0	6.38289e-05	0.00438838	0.00323078	0.00448273	0.000968142	0.00879158
adenoviridae	Crocidura maquassiensis	Eulipotyphla	Soricidae	FALSE	0	0.0249845	0.163246	3.29377e-26	0.123937	0	7.56838e-06	0.0250449	3.32315e-26	0.124232	0	7.62705e-06	0.00580466	0.00431532	0.00578363	0.00128774	0.0116023
adenoviridae	Crocidura mariquensis	Eulipotyphla	Soricidae	FALSE	0	0.0401015	0.201727	2.91763e-15	0.149026	5.96262e-39	0.00666129	0.0402637	2.91961e-15	0.149464	6.09992e-39	0.00671297	0.00868897	0.00644202	0.00858814	0.00193719	0.017523
adenoviridae	Crocidura maurisca	Eulipotyphla	Soricidae	FALSE	0	0.289129	0.455229	0.0145084	0.348165	1.37757e-11	0.773417	0.28979	0.0145959	0.348815	1.40495e-11	0.776436	0.00862578	0.00639849	0.00852582	0.00192278	0.0173775
adenoviridae	Crocidura maxi	Eulipotyphla	Soricidae	FALSE	0	1.03521e-06	0	0	8.90482e-06	0	1.91863e-17	1.03624e-06	0	8.91362e-06	0	1.93583e-17	0.00747973	0.00559462	0.00739989	0.0016526	0.0152715
adenoviridae	Crocidura mdumai	Eulipotyphla	Soricidae	FALSE	0	0.112721	0.314256	1.16716e-09	0.2229	1.07548e-20	0.532034	0.112904	1.17213e-09	0.223181	1.07706e-20	0.532731	0.00430753	0.00315822	0.00441178	0.000942505	0.0085868
adenoviridae	Crocidura mindorus	Eulipotyphla	Soricidae	FALSE	0	1.49497e-06	0	0	1.27944e-05	0	1.94702e-23	1.50381e-06	0	1.28703e-05	0	1.95159e-23	0.00429555	0.00314963	0.00440132	0.000940812	0.00857077
adenoviridae	Crocidura miya	Eulipotyphla	Soricidae	FALSE	0	1.03036e-05	0	0	8.36553e-05	0	4.63028e-19	1.03076e-05	0	8.36869e-05	0	4.64095e-19	0.00429808	0.00315144	0.00440352	0.000941029	0.00857415
adenoviridae	Crocidura monax	Eulipotyphla	Soricidae	FALSE	0	0.108506	0.30539	8.18626e-11	0.222174	7.22784e-24	0.485402	0.108674	8.24468e-11	0.22245	7.3195e-24	0.486221	0.00459986	0.00341422	0.00467044	0.00102216	0.00930321
adenoviridae	Crocidura monticola	Eulipotyphla	Soricidae	FALSE	0	3.09003e-06	0	0	2.65815e-05	0	5.34293e-21	3.09366e-06	0	2.66127e-05	0	5.39241e-21	0.00878901	0.00651215	0.00868683	0.00196001	0.0177533
adenoviridae	Crocidura montis	Eulipotyphla	Soricidae	FALSE	0	0.294225	0.453065	0.0232499	0.340235	6.83187e-12	0.763701	0.294812	0.0233729	0.340752	6.89097e-12	0.765043	0.00704801	0.00460513	0.00813005	0.00161367	0.0141523
adenoviridae	Crocidura muricauda	Eulipotyphla	Soricidae	FALSE	0	0.0443143	0.207304	1.68312e-11	0.154404	1.65499e-26	0.0665249	0.0444564	1.70125e-11	0.154801	1.66143e-26	0.0667585	0.00756785	0.00565649	0.00748608	0.0016733	0.015451
adenoviridae	Crocidura musseri	Eulipotyphla	Soricidae	FALSE	0	1.79017e-06	0	0	1.53996e-05	0	3.24296e-35	1.79114e-06	0	1.5408e-05	0	3.31034e-35	0.00429686	0.00315057	0.00440246	0.000940925	0.00857252
adenoviridae	Crocidura mutesae	Eulipotyphla	Soricidae	FALSE	0	0.469653	0.499	0.611762	0.374247	3.28827e-08	0.905048	0.470142	0.612777	0.374446	3.31598e-08	0.905491	0.00448455	0.00330553	0.00456773	0.000990446	0.00903035
adenoviridae	Crocidura nana	Eulipotyphla	Soricidae	FALSE	0	0.00757653	0.0815789	9.19536e-34	0.0642483	0	1.9044e-07	0.00759713	9.19883e-34	0.0644215	0	1.90675e-07	0.00429128	0.00314656	0.00439758	0.000940445	0.00856504
adenoviridae	Crocidura nanilla	Eulipotyphla	Soricidae	FALSE	0	0.00870255	0.0896348	7.50299e-33	0.0748521	0	1.33469e-08	0.00873006	7.50944e-33	0.0750888	0	1.3451e-08	0.00681121	0.00509351	0.00674897	0.00151601	0.0138806
adenoviridae	Crocidura negligens	Eulipotyphla	Soricidae	FALSE	0	0.0434437	0.206203	6.26153e-13	0.173172	2.17016e-36	0.00411088	0.043545	6.313e-13	0.173425	2.20745e-36	0.00415098	0.00751494	0.0056197	0.00743432	0.00166087	0.0153402
adenoviridae	Crocidura negrina	Eulipotyphla	Soricidae	FALSE	0	6.54031e-08	0	0	5.62506e-07	0	1.31792e-23	6.54395e-08	0	5.62818e-07	0	1.32183e-23	0.00440076	0.00324216	0.00449364	0.000971014	0.00883082
adenoviridae	Crocidura newmarki	Eulipotyphla	Soricidae	FALSE	0	0.118314	0.328207	7.31481e-08	0.225926	5.09079e-22	0.480644	0.118493	7.32793e-08	0.226192	5.10278e-22	0.481343	0.00429692	0.00315061	0.00440251	0.000940929	0.0085726
adenoviridae	Crocidura nicobarica	Eulipotyphla	Soricidae	FALSE	0	0.16027	0.366884	1.26198e-09	0.305524	0	0.750366	0.160397	1.26676e-09	0.305702	0	0.750942	0.0042937	0.0031483	0.0043997	0.000940653	0.00856829
adenoviridae	Crocidura nigeriae	Eulipotyphla	Soricidae	FALSE	0	0.643935	0.478483	0.752836	0.30522	0.00106805	0.942906	0.64465	0.754602	0.305393	0.00109211	0.943099	0.00615622	0.00459142	0.00611822	0.00137016	0.0123532
adenoviridae	Crocidura nigricans	Eulipotyphla	Soricidae	FALSE	0	0.0129652	0.117903	2.58667e-22	0.0884563	0	1.35943e-06	0.0129903	2.5929e-22	0.0886064	0	1.36459e-06	0.00450027	0.00331654	0.00458168	0.000994092	0.00906201
adenoviridae	Crocidura nigripes	Eulipotyphla	Soricidae	FALSE	0	2.00868e-07	0	0	1.72722e-06	0	5.14526e-27	2.01026e-07	0	1.72857e-06	0	5.186e-27	0.00602865	0.00449076	0.00599643	0.00134868	0.0120727
adenoviridae	Crocidura nigrofusca	Eulipotyphla	Soricidae	FALSE	0	0.185073	0.390392	1.46358e-05	0.298093	1.45992e-17	0.726637	0.18564	1.50253e-05	0.298781	1.46443e-17	0.728644	0.0105645	0.00782772	0.0104426	0.00230235	0.0214112
adenoviridae	Crocidura nimbae	Eulipotyphla	Soricidae	FALSE	0	0.156229	0.362381	3.34722e-05	0.271946	9.48719e-18	0.681739	0.156485	3.42127e-05	0.272347	9.50075e-18	0.682495	0.00494961	0.00367565	0.00498682	0.00110161	0.010019
adenoviridae	Crocidura nimbasilvanus	Eulipotyphla	Soricidae	FALSE	0	0.663009	0.471463	0.83968	0.371417	3.60042e-07	0.977282	0.66339	0.840568	0.37148	3.62518e-07	0.977392	0.00492298	0.00365574	0.0049625	0.00109585	0.00995226
adenoviridae	Crocidura ninoyi	Eulipotyphla	Soricidae	FALSE	0	7.11293e-06	0	0	6.08728e-05	0	9.45475e-25	7.15646e-06	0	6.12471e-05	0	9.47634e-25	0.00429235	0.00314733	0.00439851	0.000940537	0.00856648
adenoviridae	Crocidura niobe	Eulipotyphla	Soricidae	FALSE	0	0.220889	0.414584	0.00233519	0.292417	4.73283e-12	0.690657	0.221394	0.00234127	0.292995	4.77265e-12	0.692205	0.00534663	0.00397822	0.0053533	0.00117337	0.0108564
adenoviridae	Crocidura obscurior	Eulipotyphla	Soricidae	FALSE	0	0.158634	0.365022	2.37088e-06	0.276375	2.55401e-20	0.66995	0.15924	2.38774e-06	0.277224	2.57597e-20	0.672669	0.0107938	0.00727375	0.0122901	0.00232813	0.0221134
adenoviridae	Crocidura olivieri	Eulipotyphla	Soricidae	FALSE	0	0.817094	0.383352	0.809729	0.0771719	0.731287	0.938579	0.833542	0.818692	0.0684321	0.759106	0.941407	0.0873608	0.0413863	0.111167	0.00983479	0.229971
adenoviridae	Crocidura orientalis	Eulipotyphla	Soricidae	FALSE	0	0.0438577	0.204873	2.76845e-15	0.159179	0	0.00186443	0.0439405	2.77617e-15	0.159403	0	0.00187417	0.00432349	0.00317117	0.00442575	0.000945735	0.00860877
adenoviridae	Crocidura orii	Eulipotyphla	Soricidae	FALSE	0	0.0787172	0.270983	3.04592e-12	0.230018	0	0.258114	0.078796	3.05113e-12	0.230208	0	0.258576	0.00436612	0.00321036	0.00446315	0.000963159	0.00871886
adenoviridae	Crocidura pachyura	Eulipotyphla	Soricidae	FALSE	0	0.461824	0.498349	0.663647	0.377763	6.76431e-09	0.864325	0.462277	0.663987	0.378049	6.78477e-09	0.865974	0.00438485	0.00322753	0.00447962	0.000967335	0.00878038
adenoviridae	Crocidura palawanensis	Eulipotyphla	Soricidae	FALSE	0	1.10501e-07	0	0	9.50568e-07	0	6.53611e-23	1.10562e-07	0	9.51094e-07	0	6.57612e-23	0.00437781	0.00322107	0.00447343	0.000965766	0.00875772
adenoviridae	Crocidura panayensis	Eulipotyphla	Soricidae	FALSE	0	2.57074e-08	0	0	2.21143e-07	0	6.20497e-25	2.57213e-08	0	2.21263e-07	0	6.24989e-25	0.00429222	0.00314724	0.00439841	0.000940526	0.00856631
adenoviridae	Crocidura paradoxura	Eulipotyphla	Soricidae	FALSE	0	4.31068e-07	0	0	3.70818e-06	0	5.07746e-27	4.31395e-07	0	3.711e-06	0	5.09748e-27	0.005862	0.00436158	0.00583798	0.00130375	0.0117022
adenoviridae	Crocidura parvipes	Eulipotyphla	Soricidae	FALSE	0	0.0214179	0.149903	8.32804e-19	0.110122	0	1.65904e-05	0.0215058	8.47183e-19	0.110533	0	1.68638e-05	0.0118229	0.00874338	0.0116874	0.0025543	0.0238484
adenoviridae	Crocidura pasha	Eulipotyphla	Soricidae	FALSE	0	0.00827495	0.0885302	8.03846e-38	0.0711822	0	7.57274e-11	0.00829676	8.1022e-38	0.0713698	0	7.62304e-11	0.00498667	0.00370433	0.00502073	0.00110521	0.0101082
adenoviridae	Crocidura pergrisea	Eulipotyphla	Soricidae	FALSE	0	0.0395984	0.189496	2.79734e-24	0.159158	0	0.0016445	0.0396389	2.80451e-24	0.159266	0	0.0016517	0.00429013	0.00314574	0.00439658	0.000940347	0.00856351
adenoviridae	Crocidura phaeura	Eulipotyphla	Soricidae	FALSE	0	2.53692e-09	0	0	1.99027e-08	0	1.10494e-14	2.53929e-09	0	1.99142e-08	0	1.10947e-14	0.0042945	0.00314887	0.0044004	0.000940722	0.00856936
adenoviridae	Crocidura picea	Eulipotyphla	Soricidae	FALSE	0	0.00284872	0.048931	2.36795e-24	0.0241557	0	2.83584e-09	0.00286328	2.3734e-24	0.0242791	0	2.84969e-09	0.00456698	0.00338123	0.00464107	0.00101242	0.00920512
adenoviridae	Crocidura pitmani	Eulipotyphla	Soricidae	FALSE	0	0.0147176	0.128145	7.75494e-24	0.0933105	0	6.74803e-06	0.0147458	7.82299e-24	0.093477	0	6.78325e-06	0.004393	0.00323502	0.0044868	0.000969213	0.00880622
adenoviridae	Crocidura planiceps	Eulipotyphla	Soricidae	FALSE	0	0.00771036	0.0862772	1.74739e-38	0.0659585	0	5.99235e-12	0.0077341	1.76358e-38	0.0661605	0	6.02059e-12	0.00429117	0.00314648	0.00439749	0.000940436	0.0085649
adenoviridae	Crocidura poensis	Eulipotyphla	Soricidae	FALSE	0	0.47727	0.499584	0.584228	0.345699	7.04389e-07	0.875873	0.478352	0.586837	0.346095	7.13012e-07	0.877051	0.00906317	0.00670013	0.00895751	0.00202296	0.0183814
adenoviridae	Crocidura polia	Eulipotyphla	Soricidae	FALSE	0	0.060435	0.238779	2.18786e-14	0.188991	0	0.0185005	0.0605272	2.19606e-14	0.189289	0	0.018569	0.00429083	0.00314624	0.00439719	0.000940407	0.00856444
adenoviridae	Crocidura pullata	Eulipotyphla	Soricidae	FALSE	0	0.0570951	0.23146	1.6997e-10	0.167005	1.75165e-23	0.151606	0.0571899	1.70574e-10	0.167246	1.76252e-23	0.152214	0.00450718	0.0033252	0.00458782	0.000995695	0.00907593
adenoviridae	Crocidura raineyi	Eulipotyphla	Soricidae	FALSE	0	0.0589264	0.232224	2.76894e-14	0.177605	2.19612e-33	0.103089	0.0590341	2.77943e-14	0.177842	2.20401e-33	0.104476	0.00429162	0.00314681	0.00439788	0.000940475	0.0085655
adenoviridae	Crocidura ramona	Eulipotyphla	Soricidae	FALSE	0	0.00377292	0.0698283	0	0.0324559	0	3.62742e-13	0.00378968	0	0.0326001	0	3.63669e-13	0.00433765	0.00318417	0.00443816	0.000952229	0.00865626
adenoviridae	Crocidura rapax	Eulipotyphla	Soricidae	FALSE	0	0.544187	0.498182	0.715651	0.350531	0.000234605	0.881297	0.545127	0.716873	0.351037	0.000236242	0.882014	0.0076844	0.00571551	0.00760021	0.00170201	0.0156905
adenoviridae	Crocidura religiosa	Eulipotyphla	Soricidae	FALSE	0	0.00934227	0.095987	2.3383e-37	0.0751685	0	2.78856e-10	0.0093631	2.34483e-37	0.0753292	0	2.79226e-10	0.00432959	0.00317677	0.00443109	0.000947755	0.00862942
adenoviridae	Crocidura rhoditis	Eulipotyphla	Soricidae	FALSE	0	8.56605e-07	0	0	5.72257e-06	0	9.51876e-22	8.61655e-07	0	5.76243e-06	0	9.60034e-22	0.0060697	0.00451567	0.00603557	0.00135704	0.0121616
adenoviridae	Crocidura roosevelti	Eulipotyphla	Soricidae	FALSE	0	0.0211529	0.137577	1.47648e-14	0.102286	5.12136e-32	0.000572885	0.0212401	1.50492e-14	0.102585	5.1536e-32	0.000582965	0.00813237	0.00602343	0.00803993	0.00181592	0.0164934
adenoviridae	Crocidura russula	Eulipotyphla	Soricidae	FALSE	0	0.918258	0.279772	0.951243	0.0910279	0.7965	0.99891	0.938631	0.96452	0.0697688	0.829092	0.999198	0.239506	0.1874	0.201528	0.023606	0.53099
adenoviridae	Crocidura sapaensis	Eulipotyphla	Soricidae	FALSE	0	0.112369	0.314008	5.61658e-12	0.241408	9.80113e-39	0.55127	0.112511	5.62112e-12	0.241635	9.9115e-39	0.552473	0.00431471	0.00316359	0.00441806	0.0009439	0.00859642
adenoviridae	Crocidura selina	Eulipotyphla	Soricidae	FALSE	0	0.0713622	0.253284	5.16707e-09	0.198834	1.02395e-25	0.315583	0.0714716	5.19229e-09	0.199129	1.02904e-25	0.316199	0.00441542	0.00325562	0.00450656	0.000974413	0.00887728
adenoviridae	Crocidura serezkyensis	Eulipotyphla	Soricidae	FALSE	0	0.294038	0.458432	0.000589426	0.392269	2.05474e-21	0.923275	0.294243	0.000590956	0.392409	2.05981e-21	0.923415	0.00493519	0.00366582	0.00497365	0.00109932	0.00998321
adenoviridae	Crocidura shantungensis	Eulipotyphla	Soricidae	FALSE	0	0.873986	0.329353	0.907052	0.131767	0.766185	0.987112	0.88175	0.914028	0.127367	0.771898	0.987316	0.0742835	0.0341765	0.0984605	0.0081701	0.193819
adenoviridae	Crocidura sibirica	Eulipotyphla	Soricidae	FALSE	0	0.578403	0.493767	0.737324	0.361257	3.7176e-06	0.937142	0.579372	0.737532	0.361602	3.8178e-06	0.937736	0.0100638	0.00746868	0.00994703	0.00221694	0.0204339
adenoviridae	Crocidura sicula	Eulipotyphla	Soricidae	FALSE	0	0.359601	0.479442	0.252518	0.36283	8.67037e-18	0.804841	0.360053	0.253183	0.363202	8.68109e-18	0.805364	0.00448982	0.00330921	0.00457239	0.000991667	0.00904095
adenoviridae	Crocidura silacea	Eulipotyphla	Soricidae	FALSE	0	0.195248	0.401269	1.18366e-06	0.320943	2.43384e-21	0.744832	0.19557	1.19157e-06	0.321338	2.45075e-21	0.746057	0.00581885	0.00432677	0.00579707	0.00129114	0.0116233
adenoviridae	Crocidura smithii	Eulipotyphla	Soricidae	FALSE	0	0.0156021	0.128521	6.73399e-27	0.0859989	0	6.17335e-07	0.0156414	6.75856e-27	0.086227	0	6.20428e-07	0.00504077	0.00374744	0.00507034	0.00111531	0.0102363
adenoviridae	Crocidura somalica	Eulipotyphla	Soricidae	FALSE	0	0.0503572	0.221623	7.41735e-14	0.175539	5.82822e-26	0.0555378	0.0504621	7.45182e-14	0.175758	6.0066e-26	0.0559632	0.00720189	0.00470514	0.00829642	0.0016437	0.0144111
adenoviridae	Crocidura stenocephala	Eulipotyphla	Soricidae	FALSE	0	0.238029	0.431501	0.00363396	0.307053	6.15058e-13	0.723206	0.238423	0.00364239	0.307456	6.17803e-13	0.723758	0.00436976	0.00321368	0.00446635	0.000963971	0.00873096
adenoviridae	Crocidura suaveolens	Eulipotyphla	Soricidae	FALSE	0	0.870512	0.334535	0.894652	0.14585	0.761457	0.994891	0.872792	0.895105	0.145216	0.764589	0.994926	0.0244365	0.0138935	0.0327962	0.00464071	0.0524019
adenoviridae	Crocidura susiana	Eulipotyphla	Soricidae	FALSE	0	0.00986035	0.102886	1.6944e-32	0.0836356	0	3.39225e-08	0.00987701	1.7016e-32	0.0837743	0	3.39381e-08	0.00429529	0.00314944	0.00440109	0.00094079	0.00857042
adenoviridae	Crocidura tanakae	Eulipotyphla	Soricidae	FALSE	0	0.675622	0.467887	0.773049	0.285638	0.0135566	0.932302	0.67684	0.774536	0.285905	0.0136586	0.934925	0.00928001	0.00624464	0.0105924	0.00203329	0.0190523
adenoviridae	Crocidura tansaniana	Eulipotyphla	Soricidae	FALSE	0	0.0113911	0.101449	1.40931e-21	0.0866088	0	0.000433075	0.0114116	1.41901e-21	0.0867417	0	0.000435385	0.00437638	0.00321975	0.00447217	0.000965447	0.00875296
adenoviridae	Crocidura tarella	Eulipotyphla	Soricidae	FALSE	0	0.0774798	0.27406	3.33814e-10	0.193466	3.56754e-26	0.399151	0.07762	3.34378e-10	0.19378	3.57049e-26	0.400683	0.00439826	0.00323986	0.00449143	0.000970433	0.00882289
adenoviridae	Crocidura tarfayensis	Eulipotyphla	Soricidae	FALSE	0	0.0106187	0.108885	0	0.0670489	0	8.01251e-17	0.0106502	0	0.0672505	0	8.0434e-17	0.00449036	0.00330959	0.00457288	0.000991793	0.00904205
adenoviridae	Crocidura telfordi	Eulipotyphla	Soricidae	FALSE	0	0.111875	0.307966	4.75343e-10	0.24218	1.03651e-24	0.604215	0.112056	4.78309e-10	0.242435	1.03791e-24	0.604649	0.00456267	0.00337601	0.00463722	0.00101111	0.00919467
adenoviridae	Crocidura tenuis	Eulipotyphla	Soricidae	FALSE	0	0.0515579	0.231077	1.84683e-22	0.165071	0	0.100788	0.0516586	1.8588e-22	0.16535	0	0.100883	0.00472079	0.00351552	0.00477906	0.00105005	0.00949993
adenoviridae	Crocidura thalia	Eulipotyphla	Soricidae	FALSE	0	1.09098e-09	0	0	9.38494e-09	0	5.03856e-20	1.09176e-09	0	9.39165e-09	0	5.07739e-20	0.00553768	0.00411505	0.00553192	0.00122652	0.0111201
adenoviridae	Crocidura theresae	Eulipotyphla	Soricidae	FALSE	0	0.544512	0.497573	0.706626	0.355743	6.49476e-05	0.9235	0.545788	0.707974	0.35615	6.5575e-05	0.924172	0.00903142	0.00607237	0.0103147	0.00198459	0.0185507
adenoviridae	Crocidura thomensis	Eulipotyphla	Soricidae	FALSE	0	0.00417092	0.0638998	1.427e-25	0.0358163	0	1.97818e-06	0.00417639	1.42956e-25	0.035863	0	2.0207e-06	0.00429266	0.00314755	0.00439879	0.000940564	0.0085669
adenoviridae	Crocidura turba	Eulipotyphla	Soricidae	FALSE	0	0.159689	0.363706	4.84542e-05	0.263398	1.16969e-16	0.631752	0.160345	4.86704e-05	0.264271	1.18412e-16	0.63242	0.0116618	0.00860817	0.0115281	0.00250996	0.0235496
adenoviridae	Crocidura ultima	Eulipotyphla	Soricidae	FALSE	0	0.16894	0.380053	3.20376e-07	0.303979	3.71265e-22	0.686241	0.169117	3.20603e-07	0.304215	3.75017e-22	0.687031	0.00431699	0.00316542	0.00442006	0.000944343	0.00859948
adenoviridae	Crocidura umbra	Eulipotyphla	Soricidae	FALSE	0	7.71783e-07	0	1.68565e-36	6.63622e-06	0	6.68328e-18	7.72201e-07	1.69031e-36	6.63981e-06	0	6.71583e-18	0.00429393	0.00314847	0.0043999	0.000940673	0.0085686
adenoviridae	Crocidura usambarae	Eulipotyphla	Soricidae	FALSE	0	0.359292	0.480722	0.184958	0.372938	6.43796e-10	0.820563	0.359659	0.185232	0.373157	6.44847e-10	0.821127	0.00436473	0.00320942	0.00446193	0.000962847	0.00871421
adenoviridae	Crocidura viaria	Eulipotyphla	Soricidae	FALSE	0	0.0540352	0.21691	1.92581e-12	0.169337	1.77278e-28	0.109556	0.0542232	1.95951e-12	0.169877	1.77909e-28	0.109948	0.0103842	0.00768857	0.0102642	0.00226686	0.0210153
adenoviridae	Crocidura virgata	Eulipotyphla	Soricidae	FALSE	0	0.0160199	0.136525	1.77201e-16	0.0836012	0	3.75599e-05	0.0160529	1.77767e-16	0.0837726	0	3.77514e-05	0.00429527	0.00314942	0.00440107	0.000940788	0.00857039
adenoviridae	Crocidura voi	Eulipotyphla	Soricidae	FALSE	0	0.0087115	0.0933946	8.16936e-33	0.0747549	0	3.46081e-08	0.00874478	8.19451e-33	0.07504	0	3.49539e-08	0.0083715	0.00620731	0.00827525	0.00186792	0.0168949
adenoviridae	Crocidura vorax	Eulipotyphla	Soricidae	FALSE	0	0.441383	0.497544	0.564254	0.351018	1.58342e-11	0.828741	0.442544	0.565008	0.351725	1.59987e-11	0.83138	0.00924594	0.00683276	0.0091381	0.00206229	0.0187676
adenoviridae	Crocidura vosmaeri	Eulipotyphla	Soricidae	FALSE	0	0.0443636	0.207961	2.54638e-17	0.162341	0	0.00104786	0.0444208	2.57421e-17	0.162539	0	0.00105263	0.0043447	0.00319065	0.00444434	0.000956146	0.00866617
adenoviridae	Crocidura watasei	Eulipotyphla	Soricidae	FALSE	0	0.0121535	0.109778	2.15661e-33	0.0754537	0	2.55697e-07	0.0121669	2.1608e-33	0.0755433	0	2.57768e-07	0.00449268	0.00331121	0.00457494	0.000992331	0.00904672
adenoviridae	Crocidura whitakeri	Eulipotyphla	Soricidae	FALSE	0	0.0132665	0.116242	3.62546e-24	0.0860156	0	1.33298e-06	0.0133109	3.63439e-24	0.0862942	0	1.33742e-06	0.00764824	0.00569786	0.00756478	0.00169295	0.0156166
adenoviridae	Crocidura wimmeri	Eulipotyphla	Soricidae	FALSE	0	0.26443	0.441599	0.00396079	0.334181	3.42716e-13	0.805174	0.264764	0.00396228	0.334537	3.43868e-13	0.805571	0.00429031	0.00314587	0.00439674	0.000940362	0.00856375
adenoviridae	Crocidura wuchihensis	Eulipotyphla	Soricidae	FALSE	0	0.0831143	0.27406	2.27956e-17	0.204812	0	0.511657	0.0832545	2.29081e-17	0.20516	0	0.512177	0.00434167	0.00318786	0.00444168	0.000954461	0.00866191
adenoviridae	Crocidura xantippe	Eulipotyphla	Soricidae	FALSE	0	0.00974647	0.0999899	4.49339e-24	0.0838091	0	1.17081e-08	0.00976335	4.53351e-24	0.0839541	0	1.1764e-08	0.00454967	0.0033666	0.00462562	0.00100718	0.00916668
adenoviridae	Crocidura yankariensis	Eulipotyphla	Soricidae	FALSE	0	0.00785381	0.0868461	0	0.0675609	0	3.49369e-09	0.00788057	0	0.0677912	0	3.52105e-09	0.0061244	0.00455908	0.0060878	0.00136522	0.0122819
adenoviridae	Crocidura zaphiri	Eulipotyphla	Soricidae	FALSE	0	0.49382	0.499931	0.686609	0.325057	7.33664e-06	0.784149	0.494695	0.688343	0.325545	7.39263e-06	0.785625	0.0064201	0.00421463	0.00746015	0.00143714	0.0127275
adenoviridae	Crocidura zarudnyi	Eulipotyphla	Soricidae	FALSE	0	0.0479839	0.210781	2.276e-21	0.167707	0	0.0129569	0.0480698	2.29479e-21	0.167933	0	0.0129914	0.00534164	0.00397481	0.00534864	0.00117191	0.0108479
adenoviridae	Crocidura zimmeri	Eulipotyphla	Soricidae	FALSE	0	0.0898969	0.289308	4.54777e-11	0.219789	3.13894e-33	0.499455	0.0900026	4.57855e-11	0.219998	3.14189e-33	0.500201	0.00429605	0.00314999	0.00440175	0.000940855	0.00857143
adenoviridae	Crocidura zimmermanni	Eulipotyphla	Soricidae	FALSE	0	0.577122	0.494129	0.73767	0.383939	7.55475e-06	0.97584	0.577492	0.739314	0.384066	7.57606e-06	0.976002	0.00429297	0.00314777	0.00439906	0.00094059	0.00856731
adenoviridae	Crocuta crocuta	Carnivora	Hyaenidae	FALSE	0	0.844973	0.355891	0.987364	0.267408	0.351551	0.999999	0.95982	0.996112	0.12164	0.901587	1	0.698755	0.794899	0.262743	0.276547	0.960577
adenoviridae	Crossarchus alexandri	Carnivora	Herpestidae	FALSE	0	0.0480853	0.21228	0	0.203099	0	3.48315e-07	0.0481192	0	0.203227	0	3.51598e-07	0.0175273	0.0109516	0.0204093	0.00191084	0.0405437
adenoviridae	Crossarchus ansorgei	Carnivora	Herpestidae	FALSE	0	0.0734488	0.26927	1.51461e-27	0.249774	0	0.000151334	0.0734847	1.53717e-27	0.249888	0	0.00015458	0.0126756	0.00771448	0.0146233	0.00140176	0.0290794
adenoviridae	Crossarchus obscurus	Carnivora	Herpestidae	FALSE	0	0.197603	0.396431	7.11165e-09	0.368996	1.70643e-32	0.901164	0.197686	7.23873e-09	0.369132	1.72726e-32	0.901299	0.0136707	0.00839619	0.0158168	0.00149157	0.0314526
adenoviridae	Crossarchus platycephalus	Carnivora	Herpestidae	FALSE	0	0.225423	0.420189	2.55998e-09	0.374924	2.41991e-35	0.942296	0.225886	2.57728e-09	0.375412	2.50119e-35	0.94242	0.0141825	0.00873634	0.0164299	0.00154516	0.0327411
adenoviridae	Crunomys celebensis	Rodentia	Muridae	FALSE	0	2.53413e-06	0	0	2.10285e-05	0	1.16683e-12	2.55408e-06	0	2.1197e-05	0	1.17828e-12	0.014397	0.0133594	0.00609124	0.0077266	0.0223282
adenoviridae	Crunomys fallax	Rodentia	Muridae	FALSE	0	0.00137045	0.0346202	0	0.0117881	0	1.564e-22	0.00139064	0	0.0119617	0	1.57821e-22	0.0135257	0.0126339	0.00574592	0.00733973	0.0209818
adenoviridae	Crunomys melanius	Rodentia	Muridae	FALSE	0	0.00730357	0.0839618	0	0.0627204	0	4.36445e-16	0.00735922	0	0.0631983	0	4.42974e-16	0.0139887	0.0130258	0.0059257	0.00750537	0.0217539
adenoviridae	Crunomys suncoides	Rodentia	Muridae	FALSE	0	4.13366e-08	0	0	2.7781e-07	0	7.10145e-20	4.17024e-08	0	2.80353e-07	0	7.19078e-20	0.0133561	0.0124884	0.00568234	0.00725482	0.0206928
adenoviridae	Cryptochloris zyli	Afrosoricida	Chrysochloridae	FALSE	0	2.01967e-12	0	0	1.73738e-11	0	8.71156e-36	2.02472e-12	0	1.74173e-11	0	8.80283e-36	0.00674074	0.00386429	0.00910271	0.000510896	0.0167814
adenoviridae	Cryptomys hottentotus	Rodentia	Bathyergidae	FALSE	0	0.023679	0.15117	0	0.14304	0	3.11285e-11	0.0236963	0	0.143145	0	3.11498e-11	0.0119772	0.00845244	0.0121727	0.00188161	0.0257264
adenoviridae	Cryptomys mahali	Rodentia	Bathyergidae	FALSE	0	0.0219705	0.143718	1.84274e-37	0.132886	0	1.26307e-10	0.021986	1.84697e-37	0.132978	0	1.26578e-10	0.00747572	0.00534765	0.00745431	0.00116324	0.016232
adenoviridae	Cryptomys natalensis	Rodentia	Bathyergidae	FALSE	0	0.0386462	0.187531	6.34865e-31	0.189503	0	4.00655e-08	0.0386531	6.37523e-31	0.189535	0	4.0852e-08	0.00923928	0.00658542	0.00924846	0.00146597	0.0195525
adenoviridae	Cryptomys pretoriae	Rodentia	Bathyergidae	FALSE	0	0.0249378	0.161498	0	0.15082	0	2.15088e-13	0.0249449	0	0.150861	0	2.15544e-13	0.00752531	0.00537597	0.00750297	0.00116985	0.0162743
adenoviridae	Cryptonanus agricolai	Didelphimorphia	Didelphidae	FALSE	0	0.000672695	0.028273	9.56408e-36	0.00554208	0	1.77578e-08	0.000689693	9.58696e-36	0.00568732	0	1.78596e-08	0.00867679	0.00497978	0.011653	0.000750765	0.0199069
adenoviridae	Cryptonanus chacoensis	Didelphimorphia	Didelphidae	FALSE	0	0.00813158	0.0907255	2.11186e-34	0.0696869	0	9.35061e-09	0.0081423	2.21151e-34	0.0697786	0	9.36445e-09	0.00770447	0.00442432	0.0103222	0.000672936	0.0174325
adenoviridae	Cryptonanus guahybae	Didelphimorphia	Didelphidae	FALSE	0	0.039002	0.205095	8.71328e-28	0.180654	0	2.91739e-06	0.0390178	8.72011e-28	0.180708	0	2.92686e-06	0.00520342	0.00304609	0.00698844	0.000463628	0.0120596
adenoviridae	Cryptonanus unduaviensis	Didelphimorphia	Didelphidae	FALSE	0	0.000157306	0	2.40528e-33	0.00135278	0	4.77792e-10	0.000157747	2.41027e-33	0.00135657	0	4.84434e-10	0.0061975	0.00358621	0.00828729	0.000545355	0.0143733
adenoviridae	Cryptoprocta ferox	Carnivora	Eupleridae	FALSE	0	0.618892	0.485949	0.899031	0.4451	6.60782e-12	0.999798	0.619401	0.899723	0.445303	6.76066e-12	0.999798	0.0164457	0.0104323	0.0196289	0.00180362	0.038231
adenoviridae	Cryptotis alticola	Eulipotyphla	Soricidae	FALSE	0	0.014297	0.121552	0	0.0933959	0	3.6012e-14	0.0143204	0	0.0935209	0	3.62459e-14	0.00484079	0.00359849	0.00488766	0.00107762	0.00977309
adenoviridae	Cryptotis brachyonyx	Eulipotyphla	Soricidae	FALSE	0	0.000373731	0.028273	0	0.00321496	0	8.80491e-19	0.000373929	0	0.00321666	0	8.8243e-19	0.00432061	0.00316852	0.00442323	0.000945046	0.00860432
adenoviridae	Cryptotis cavatorculus	Eulipotyphla	Soricidae	FALSE	0	0.00534901	0.0676671	0	0.0460139	0	5.40335e-21	0.00536029	0	0.046111	0	5.4315e-21	0.0042911	0.00314643	0.00439743	0.00094043	0.00856481
adenoviridae	Cryptotis celaque	Eulipotyphla	Soricidae	FALSE	0	0.00986303	0.099005	0	0.084845	0	1.22504e-14	0.00987207	0	0.0849227	0	1.23829e-14	0.00429256	0.00314748	0.00439871	0.000940556	0.00856677
adenoviridae	Cryptotis colombiana	Eulipotyphla	Soricidae	FALSE	0	3.60301e-14	0	0	2.77416e-13	0	1.01356e-26	3.62462e-14	0	2.7907e-13	0	1.01634e-26	0.00431896	0.00316701	0.00442179	0.000944727	0.00860212
adenoviridae	Cryptotis endersi	Eulipotyphla	Soricidae	FALSE	0	2.37425e-11	0	0	1.28285e-10	0	3.65633e-14	2.37955e-11	0	1.28472e-10	0	3.67828e-14	0.00436424	0.00320909	0.00446149	0.000962738	0.00871258
adenoviridae	Cryptotis equatoris	Eulipotyphla	Soricidae	FALSE	0	5.7921e-07	0	0	4.66806e-06	0	1.80841e-18	5.81352e-07	0	4.68627e-06	0	1.81529e-18	0.00439978	0.00324125	0.00449277	0.000970785	0.0088277
adenoviridae	Cryptotis goldmani	Eulipotyphla	Soricidae	FALSE	0	0.00589023	0.0719233	0	0.0506687	0	1.61546e-12	0.00590434	0	0.0507901	0	1.62599e-12	0.00486579	0.00361298	0.00491039	0.00108196	0.00982749
adenoviridae	Cryptotis goodwini	Eulipotyphla	Soricidae	FALSE	0	0.00899779	0.0970039	0	0.0772058	0	6.45961e-12	0.00900935	0	0.0773051	0	6.50004e-12	0.00460205	0.00341635	0.0046724	0.00102278	0.00930827
adenoviridae	Cryptotis gracilis	Eulipotyphla	Soricidae	FALSE	0	6.53479e-09	0	0	5.29738e-08	0	9.41674e-15	6.56353e-09	0	5.32003e-08	0	9.52201e-15	0.00484426	0.0036003	0.00489082	0.00107823	0.00978066
adenoviridae	Cryptotis griseoventris	Eulipotyphla	Soricidae	FALSE	0	0.00735503	0.0912658	0	0.0632453	0	2.13933e-12	0.00736665	0	0.0633452	0	2.15509e-12	0.00429137	0.00314663	0.00439766	0.000940453	0.00856517
adenoviridae	Cryptotis hondurensis	Eulipotyphla	Soricidae	FALSE	0	0.00869572	0.0928672	0	0.0748034	0	2.89682e-17	0.00870637	0	0.074895	0	2.90907e-17	0.00429105	0.0031464	0.00439739	0.000940426	0.00856474
adenoviridae	Cryptotis lacertosus	Eulipotyphla	Soricidae	FALSE	0	0.00705601	0.0879725	0	0.0591048	0	5.84292e-11	0.00706785	0	0.0592057	0	5.87758e-11	0.0042924	0.00314737	0.00439856	0.000940541	0.00856654
adenoviridae	Cryptotis magna	Eulipotyphla	Soricidae	FALSE	0	0.00457681	0.0646712	0	0.0393708	0	7.21155e-19	0.00458785	0	0.0394657	0	7.23023e-19	0.00440062	0.00324203	0.00449351	0.000970981	0.00883038
adenoviridae	Cryptotis mam	Eulipotyphla	Soricidae	FALSE	0	0.00983812	0.0999899	1.64841e-38	0.0846273	0	8.32758e-10	0.00984723	1.65221e-38	0.0847057	0	8.3518e-10	0.0042997	0.00315261	0.00440494	0.000941169	0.00857633
adenoviridae	Cryptotis mayensis	Eulipotyphla	Soricidae	FALSE	0	0.00468714	0.0631189	0	0.0403021	0	1.9795e-16	0.0047011	0	0.040422	0	1.98712e-16	0.00508645	0.00378058	0.00511235	0.00112389	0.0103587
adenoviridae	Cryptotis mccarthyi	Eulipotyphla	Soricidae	FALSE	0	7.29397e-09	0	0	6.26492e-08	0	3.70459e-24	7.33716e-09	0	6.30207e-08	0	3.72006e-24	0.0042907	0.00314615	0.00439708	0.000940396	0.00856428
adenoviridae	Cryptotis medellinia	Eulipotyphla	Soricidae	FALSE	0	1.74209e-05	0	0	0.00014986	0	1.94451e-18	1.74305e-05	0	0.000149943	0	1.94888e-18	0.00435917	0.00320543	0.00445704	0.000961608	0.00869574
adenoviridae	Cryptotis meridensis	Eulipotyphla	Soricidae	FALSE	0	8.10163e-07	0	0	6.96353e-06	0	1.72552e-12	8.1061e-07	0	6.96735e-06	0	1.73584e-12	0.00434074	0.00318701	0.00444087	0.000953947	0.00866061
adenoviridae	Cryptotis merriami	Eulipotyphla	Soricidae	FALSE	0	0.00632772	0.0752829	0	0.0544269	0	5.82644e-20	0.00634262	0	0.0545551	0	5.86958e-20	0.00500949	0.00372085	0.00504164	0.00110868	0.0101622
adenoviridae	Cryptotis merus	Eulipotyphla	Soricidae	FALSE	0	1.05124e-08	0	0	9.04308e-08	0	4.6294e-20	1.05181e-08	0	9.04801e-08	0	4.63992e-20	0.00432646	0.0031739	0.00442836	0.000946468	0.00861884
adenoviridae	Cryptotis mexicana	Eulipotyphla	Soricidae	FALSE	0	0.00674887	0.0791221	0	0.0580559	0	4.5359e-15	0.00676185	0	0.0581676	0	4.54661e-15	0.00457073	0.00338542	0.00464441	0.00101356	0.0092166
adenoviridae	Cryptotis montivaga	Eulipotyphla	Soricidae	FALSE	0	3.46089e-12	0	0	2.12493e-11	0	4.14062e-24	3.47185e-12	0	2.13247e-11	0	4.14928e-24	0.0043714	0.00321518	0.0044678	0.000964337	0.00873641
adenoviridae	Cryptotis nelsoni	Eulipotyphla	Soricidae	FALSE	0	0.00714398	0.0833727	0	0.0614548	0	5.81318e-23	0.00715566	0	0.0615553	0	5.84304e-23	0.00429029	0.00314585	0.00439672	0.00094036	0.00856372
adenoviridae	Cryptotis nigrescens	Eulipotyphla	Soricidae	FALSE	0	2.26697e-08	0	0	1.58802e-07	0	1.17296e-16	2.27525e-08	0	1.59471e-07	0	1.17781e-16	0.00498075	0.00370004	0.00501531	0.00110463	0.0100942
adenoviridae	Cryptotis obscura	Eulipotyphla	Soricidae	FALSE	0	0.0143239	0.119945	0	0.0982902	0	1.11442e-10	0.0143432	0	0.0983664	0	1.11915e-10	0.00441646	0.00325658	0.00450748	0.000974655	0.00888058
adenoviridae	Cryptotis orophila	Eulipotyphla	Soricidae	FALSE	0	5.00388e-07	0	0	4.15459e-06	0	8.22832e-16	5.00807e-07	0	4.15741e-06	0	8.27929e-16	0.00526144	0.00391174	0.00527409	0.00115078	0.0107111
adenoviridae	Cryptotis parva	Eulipotyphla	Soricidae	FALSE	0	0.0542584	0.225227	1.99074e-14	0.179917	2.63444e-36	0.00404644	0.0544717	1.99963e-14	0.180498	2.67019e-36	0.00408344	0.00919941	0.00679757	0.00909212	0.00205227	0.0186693
adenoviridae	Cryptotis peregrina	Eulipotyphla	Soricidae	FALSE	0	0.0145287	0.115823	0	0.0949514	0	3.26196e-14	0.0145482	0	0.0950541	0	3.28144e-14	0.00430033	0.00315306	0.00440549	0.000941223	0.00857717
adenoviridae	Cryptotis peruviensis	Eulipotyphla	Soricidae	FALSE	0	1.51898e-06	0	0	1.30316e-05	0	9.51651e-17	1.528e-06	0	1.31091e-05	0	9.53145e-17	0.00431242	0.00316173	0.00441607	0.000943457	0.00859336
adenoviridae	Cryptotis phillipsii	Eulipotyphla	Soricidae	FALSE	0	0.010564	0.0999899	0	0.0908741	0	6.80692e-14	0.0105719	0	0.0909418	0	6.84763e-14	0.00434157	0.00318777	0.0044416	0.000954408	0.00866177
adenoviridae	Cryptotis squamipes	Eulipotyphla	Soricidae	FALSE	0	3.5544e-12	0	0	2.55445e-11	0	1.7871e-22	3.57385e-12	0	2.57054e-11	0	1.79493e-22	0.00445891	0.00328761	0.004545	0.000984497	0.0089787
adenoviridae	Cryptotis tamensis	Eulipotyphla	Soricidae	FALSE	0	1.89076e-05	0.0099995	0	0.000162493	0	1.49211e-16	1.8918e-05	0	0.000162581	0	1.49771e-16	0.00431447	0.00316339	0.00441786	0.000943854	0.0085961
adenoviridae	Cryptotis thomasi	Eulipotyphla	Soricidae	FALSE	0	4.43825e-10	0	0	3.21053e-09	0	2.38274e-21	4.44524e-10	0	3.21306e-09	0	2.39183e-21	0.00436516	0.00320971	0.00446231	0.000962945	0.00871567
adenoviridae	Cryptotis tropicalis	Eulipotyphla	Soricidae	FALSE	0	0.00676955	0.0726079	0	0.0581962	0	3.98629e-13	0.00678415	0	0.0583215	0	4.00206e-13	0.00492729	0.0036592	0.00496644	0.00109708	0.00996322
adenoviridae	Ctenodactylus gundi	Rodentia	Ctenodactylidae	FALSE	0	0.32141	0.465699	2.31355e-06	0.415541	4.55908e-22	0.950558	0.322887	2.38951e-06	0.416927	4.64767e-22	0.951963	0.0368456	0.0299941	0.0263469	0.0122645	0.0708485
adenoviridae	Ctenodactylus vali	Rodentia	Ctenodactylidae	FALSE	0	0.0512458	0.213978	2.44245e-23	0.206961	0	4.52773e-06	0.0512836	2.50091e-23	0.207066	0	4.54046e-06	0.00858095	0.00605032	0.00877269	0.00119903	0.0190472
adenoviridae	Ctenomys argentinus	Rodentia	Ctenomyidae	FALSE	0	2.52113e-30	0	0	0	0	0	2.53053e-30	0	0	0	0	0.00701809	0.00507486	0.00673584	0.00109457	0.0150221
adenoviridae	Ctenomys australis	Rodentia	Ctenomyidae	FALSE	0	1.07834e-28	0	0	0	0	2.44367e-39	1.08698e-28	0	0	0	2.45317e-39	0.00722778	0.00522725	0.00691984	0.00113458	0.0155076
adenoviridae	Ctenomys azarae	Rodentia	Ctenomyidae	FALSE	0	1.62798e-18	0	0	1.40044e-17	0	0	1.63277e-18	0	1.40456e-17	0	0	0.0068999	0.0050198	0.00663326	0.00108263	0.0147103
adenoviridae	Ctenomys bergi	Rodentia	Ctenomyidae	FALSE	0	3.40063e-33	0	0	0	0	0	3.41065e-33	0	0	0	0	0.00690236	0.00502068	0.00663539	0.00108302	0.0147168
adenoviridae	Ctenomys boliviensis	Rodentia	Ctenomyidae	FALSE	0	8.53762e-08	0	0	4.74694e-07	0	1.50468e-17	8.58793e-08	0	4.77846e-07	0	1.51053e-17	0.00730613	0.00526446	0.00698922	0.00114439	0.0157107
adenoviridae	Ctenomys bonettoi	Rodentia	Ctenomyidae	FALSE	0	9.97461e-30	0	0	0	0	0	1.00033e-29	0	0	0	0	0.00700486	0.00506392	0.00672432	0.00109223	0.0149872
adenoviridae	Ctenomys brasiliensis	Rodentia	Ctenomyidae	FALSE	0	1.52968e-28	0	0	0	0	0	1.54587e-28	0	0	0	0	0.00692141	0.00502748	0.00665187	0.00108544	0.014767
adenoviridae	Ctenomys colburni	Rodentia	Ctenomyidae	FALSE	0	6.13212e-36	0	0	0	0	0	6.19946e-36	0	0	0	0	0.00740445	0.00532432	0.00707675	0.00115832	0.0158661
adenoviridae	Ctenomys coludo	Rodentia	Ctenomyidae	FALSE	0	5.14596e-36	0	0	0	0	0	5.20055e-36	0	0	0	0	0.00695459	0.00503933	0.00668062	0.00108814	0.0148546
adenoviridae	Ctenomys conoveri	Rodentia	Ctenomyidae	FALSE	0	8.34873e-05	0	0	0.000718183	0	3.52273e-21	8.36803e-05	0	0.000719843	0	3.53466e-21	0.00725562	0.00524047	0.00694446	0.00113724	0.0155939
adenoviridae	Ctenomys coyhaiquensis	Rodentia	Ctenomyidae	FALSE	0	2.35178e-33	0	0	0	0	0	2.37031e-33	0	0	0	0	0.00698795	0.00505125	0.0067096	0.00109085	0.0149426
adenoviridae	Ctenomys dorbignyi	Rodentia	Ctenomyidae	FALSE	0	6.58563e-28	0	0	0	0	0	6.61565e-28	0	0	0	0	0.00777651	0.00557216	0.00741219	0.00120672	0.0163719
adenoviridae	Ctenomys dorsalis	Rodentia	Ctenomyidae	FALSE	0	2.23994e-20	0	0	1.92687e-19	0	0	2.24866e-20	0	1.93437e-19	0	0	0.00701956	0.00507607	0.00673711	0.00109484	0.015026
adenoviridae	Ctenomys emilianus	Rodentia	Ctenomyidae	FALSE	0	0	0	0	0	0	0	0	0	0	0	0	0.00695837	0.00504068	0.0066839	0.00108844	0.0148645
adenoviridae	Ctenomys famosus	Rodentia	Ctenomyidae	FALSE	0	7.31553e-36	0	0	0	0	0	7.39316e-36	0	0	0	0	0.00695962	0.00504113	0.00668499	0.00108855	0.0148678
adenoviridae	Ctenomys flamarioni	Rodentia	Ctenomyidae	FALSE	0	1.4808e-19	0	0	1.22155e-18	0	1.3478e-28	1.48785e-19	0	1.22753e-18	0	1.35086e-28	0.00706373	0.00511261	0.00677567	0.00110313	0.0151145
adenoviridae	Ctenomys fochi	Rodentia	Ctenomyidae	FALSE	0	0	0	0	0	0	0	0	0	0	0	0	0.00704828	0.00509983	0.00676217	0.00110023	0.0150897
adenoviridae	Ctenomys fodax	Rodentia	Ctenomyidae	FALSE	0	2.82175e-24	0	0	0	0	0	2.83272e-24	0	0	0	0	0.00701051	0.00506859	0.00672923	0.00109314	0.0150021
adenoviridae	Ctenomys frater	Rodentia	Ctenomyidae	FALSE	0	1.69504e-28	0	0	0	0	0	1.70265e-28	0	0	0	0	0.00769807	0.00550456	0.00734094	0.00118553	0.0162607
adenoviridae	Ctenomys fulvus	Rodentia	Ctenomyidae	FALSE	0	3.66577e-34	0	0	0	0	0	3.70504e-34	0	0	0	0	0.00708377	0.00512918	0.0067932	0.00110689	0.0151464
adenoviridae	Ctenomys goodfellowi	Rodentia	Ctenomyidae	FALSE	0	1.76004e-06	0	0	1.46611e-05	0	4.10354e-16	1.76687e-06	0	1.47165e-05	0	4.11282e-16	0.00695174	0.00503831	0.00667815	0.00108791	0.0148471
adenoviridae	Ctenomys haigi	Rodentia	Ctenomyidae	FALSE	0	0	0	0	0	0	0	0	0	0	0	0	0.0069894	0.00505177	0.00671086	0.00109097	0.0149464
adenoviridae	Ctenomys johannis	Rodentia	Ctenomyidae	FALSE	0	2.94315e-24	0	0	0	0	0	2.97349e-24	0	0	0	0	0.00700639	0.00506518	0.00672564	0.00109237	0.0149912
adenoviridae	Ctenomys juris	Rodentia	Ctenomyidae	FALSE	0	8.346e-26	0	0	0	0	0	8.37922e-26	0	0	0	0	0.00711764	0.0051572	0.00682288	0.00111402	0.0151996
adenoviridae	Ctenomys knighti	Rodentia	Ctenomyidae	FALSE	0	2.06039e-36	0	0	0	0	0	2.08241e-36	0	0	0	0	0.00705227	0.00510312	0.00676565	0.00110098	0.0150961
adenoviridae	Ctenomys lami	Rodentia	Ctenomyidae	FALSE	0	1.7855e-15	0	0	1.53467e-14	0	1.68182e-25	1.79417e-15	0	1.54213e-14	0	1.68578e-25	0.00695393	0.00503909	0.00668004	0.00108808	0.0148528
adenoviridae	Ctenomys latro	Rodentia	Ctenomyidae	FALSE	0	1.40492e-32	0	0	0	0	0	1.41014e-32	0	0	0	0	0.0069078	0.00502262	0.0066401	0.00108386	0.0147311
adenoviridae	Ctenomys leucodon	Rodentia	Ctenomyidae	FALSE	0	1.70525e-30	0	0	0	0	0	1.71176e-30	0	0	0	0	0.0069338	0.00503191	0.0066626	0.00108645	0.0147997
adenoviridae	Ctenomys lewisi	Rodentia	Ctenomyidae	FALSE	0	3.91958e-17	0	0	3.37175e-16	0	0	3.93439e-17	0	3.38449e-16	0	0	0.00688757	0.0050154	0.00662262	0.00108072	0.0146778
adenoviridae	Ctenomys magellanicus	Rodentia	Ctenomyidae	FALSE	0	8.47401e-37	0	0	0	0	0	8.51236e-37	0	0	0	0	0.00760668	0.00543489	0.00725827	0.00117655	0.016102
adenoviridae	Ctenomys maulinus	Rodentia	Ctenomyidae	FALSE	0	3.97769e-37	0	0	0	0	0	3.98711e-37	0	0	0	0	0.00731588	0.00526909	0.00699788	0.00114577	0.0157321
adenoviridae	Ctenomys mendocinus	Rodentia	Ctenomyidae	FALSE	0	1.29991e-40	0	0	0	0	0	1.30391e-40	0	0	0	0	0.00730403	0.00526346	0.00698736	0.00114409	0.0157061
adenoviridae	Ctenomys minutus	Rodentia	Ctenomyidae	FALSE	0	6.10832e-11	0	0	5.25457e-10	0	1.48645e-25	6.16213e-11	0	5.30086e-10	0	1.48855e-25	0.00732117	0.00527161	0.00700258	0.00114652	0.0157437
adenoviridae	Ctenomys occultus	Rodentia	Ctenomyidae	FALSE	0	0	0	0	0	0	0	0	0	0	0	0	0.00710257	0.00514473	0.00680967	0.00111071	0.0151759
adenoviridae	Ctenomys opimus	Rodentia	Ctenomyidae	FALSE	0	5.8149e-20	0	0	4.99043e-19	0	0	5.83194e-20	0	5.00496e-19	0	0	0.00793598	0.00566623	0.00755785	0.00123857	0.0166102
adenoviridae	Ctenomys osvaldoreigi	Rodentia	Ctenomyidae	FALSE	0	1.36967e-32	0	0	0	0	0	1.37512e-32	0	0	0	0	0.00711699	0.00515666	0.00682231	0.00111388	0.0151985
adenoviridae	Ctenomys pearsoni	Rodentia	Ctenomyidae	FALSE	0	1.17261e-33	0	0	0	0	0	1.18153e-33	0	0	0	0	0.00721268	0.00522008	0.00690651	0.00113349	0.0154442
adenoviridae	Ctenomys perrensi	Rodentia	Ctenomyidae	FALSE	0	8.72394e-25	0	0	0	0	0	8.75945e-25	0	0	0	0	0.00722041	0.00522375	0.00691333	0.00113405	0.0154766
adenoviridae	Ctenomys peruanus	Rodentia	Ctenomyidae	FALSE	0	4.74735e-14	0	0	4.08382e-13	0	0	4.75427e-14	0	4.08978e-13	0	0	0.0069017	0.00502044	0.00663482	0.00108291	0.014715
adenoviridae	Ctenomys pilarensis	Rodentia	Ctenomyidae	FALSE	0	2.13486e-20	0	0	1.83644e-19	0	1.51877e-35	2.14346e-20	0	1.84384e-19	0	1.53478e-35	0.0071728	0.00519841	0.00687136	0.00112571	0.0152862
adenoviridae	Ctenomys pontifex	Rodentia	Ctenomyidae	FALSE	0	2.95959e-38	0	0	0	0	0	2.99128e-38	0	0	0	0	0.0070756	0.00512242	0.00678605	0.00110535	0.0151336
adenoviridae	Ctenomys porteousi	Rodentia	Ctenomyidae	FALSE	0	2.53788e-38	0	0	0	0	0	2.55141e-38	0	0	0	0	0.00705595	0.00510617	0.00676887	0.00110167	0.015102
adenoviridae	Ctenomys pundti	Rodentia	Ctenomyidae	FALSE	0	6.59696e-33	0	0	0	0	0	6.62205e-33	0	0	0	0	0.00691597	0.00502554	0.00664716	0.001085	0.0147527
adenoviridae	Ctenomys rionegrensis	Rodentia	Ctenomyidae	FALSE	0	1.42345e-28	0	0	0	0	0	1.42944e-28	0	0	0	0	0.00738104	0.00531444	0.00705586	0.001155	0.0158364
adenoviridae	Ctenomys roigi	Rodentia	Ctenomyidae	FALSE	0	1.09939e-21	0	0	9.45738e-21	0	0	1.10352e-21	0	9.49288e-21	0	0	0.00686664	0.00500273	0.00660456	0.00107748	0.0146225
adenoviridae	Ctenomys saltarius	Rodentia	Ctenomyidae	FALSE	0	2.95347e-34	0	0	0	0	0	2.96569e-34	0	0	0	0	0.00728914	0.00525639	0.00697415	0.00114198	0.0156734
adenoviridae	Ctenomys sericeus	Rodentia	Ctenomyidae	FALSE	0	2.60154e-33	0	0	0	0	0	2.62924e-33	0	0	0	0	0.00700293	0.00506232	0.00672263	0.00109207	0.0149821
adenoviridae	Ctenomys sociabilis	Rodentia	Ctenomyidae	FALSE	0	1.6555e-37	0	0	0	0	0	1.67316e-37	0	0	0	0	0.00702311	0.00507901	0.00674021	0.00109551	0.0150352
adenoviridae	Ctenomys steinbachi	Rodentia	Ctenomyidae	FALSE	0	5.78577e-08	0	0	4.47154e-07	0	2.38633e-18	5.82632e-08	0	4.50439e-07	0	2.39553e-18	0.00698506	0.00505022	0.00670709	0.00109062	0.014935
adenoviridae	Ctenomys talarum	Rodentia	Ctenomyidae	FALSE	0	1.46855e-17	0	0	1.26323e-16	0	0	1.47248e-17	0	1.26661e-16	0	0	0.00729791	0.00526056	0.00698193	0.00114323	0.0156926
adenoviridae	Ctenomys torquatus	Rodentia	Ctenomyidae	FALSE	0	1.35993e-32	0	0	0	0	0	1.36232e-32	0	0	0	0	0.00799651	0.00570784	0.0076134	0.00124976	0.0166763
adenoviridae	Ctenomys tuconax	Rodentia	Ctenomyidae	FALSE	0	7.95424e-38	0	0	0	0	0	7.98824e-38	0	0	0	0	0.00717612	0.00520053	0.00687428	0.00112636	0.0152914
adenoviridae	Ctenomys tucumanus	Rodentia	Ctenomyidae	FALSE	0	1.20349e-38	0	0	0	0	0	1.20887e-38	0	0	0	0	0.00712846	0.00516615	0.00683237	0.0011164	0.0152165
adenoviridae	Ctenomys tulduco	Rodentia	Ctenomyidae	FALSE	0	1.50929e-35	0	0	0	0	0	1.52519e-35	0	0	0	0	0.00686653	0.00500266	0.00660447	0.00107746	0.0146222
adenoviridae	Ctenomys validus	Rodentia	Ctenomyidae	FALSE	0	1.30417e-40	0	0	0	0	0	1.31809e-40	0	0	0	0	0.00702992	0.00508465	0.00674615	0.00109679	0.0150526
adenoviridae	Ctenomys viperinus	Rodentia	Ctenomyidae	FALSE	0	2.79999e-37	0	0	0	0	0	2.83039e-37	0	0	0	0	0.00725532	0.00524033	0.00694419	0.0011372	0.0155931
adenoviridae	Ctenomys yolandae	Rodentia	Ctenomyidae	FALSE	0	8.12814e-36	0	0	0	0	0	8.16081e-36	0	0	0	0	0.00714959	0.00518356	0.00685094	0.00112104	0.0152497
adenoviridae	Cuniculus paca	Rodentia	Cuniculidae	FALSE	0	0.673356	0.465739	0.906058	0.425217	9.93405e-09	0.999487	0.676516	0.912633	0.426459	1.07361e-08	0.999525	0.0853663	0.0718662	0.0543084	0.0324725	0.158648
adenoviridae	Cuniculus taczanowskii	Rodentia	Cuniculidae	FALSE	0	0.423346	0.493412	0.029312	0.464055	1.39573e-13	0.985798	0.423662	0.0295415	0.464242	1.40444e-13	0.98586	0.00930301	0.00671749	0.00899847	0.00152603	0.0206189
adenoviridae	Cuon alpinus	Carnivora	Canidae	FALSE	0	0.826659	0.378679	0.955979	0.292932	0.31054	0.999799	0.828272	0.956303	0.292513	0.32632	0.999804	0.0222313	0.0144322	0.0260973	0.00237246	0.0481842
adenoviridae	Cuscomys ashaninka	Rodentia	Abrocomidae	FALSE	0	1.31095e-06	0	0	9.08845e-06	0	3.32806e-15	1.3181e-06	0	9.13537e-06	0	3.32903e-15	0.00803882	0.00564304	0.00802177	0.00115889	0.0176541
adenoviridae	Cuscomys oblativa	Rodentia	Abrocomidae	FALSE	0	0.00624319	0.0857044	8.59286e-38	0.0536985	0	4.9411e-09	0.00625261	8.65204e-38	0.0537796	0	5.10408e-09	0.00803948	0.00564335	0.00802233	0.00115893	0.0176556
adenoviridae	Cyclopes didactylus	Pilosa	Cyclopedidae	FALSE	0	0.248897	0.429075	5.63991e-11	0.42755	0	0.999796	0.249007	5.83459e-11	0.427728	0	0.999799	0.0359756	0.0180015	0.0485549	0.00286918	0.0912968
adenoviridae	Cynictis penicillata	Carnivora	Herpestidae	FALSE	0	0.696801	0.458866	0.859959	0.380426	3.96094e-07	0.99893	0.704807	0.876863	0.382156	4.71315e-07	0.999054	0.113762	0.101897	0.0650075	0.0413983	0.203503
adenoviridae	Cynocephalus volans	Dermoptera	Cynocephalidae	FALSE	0	0.0151368	0.129271	3.55749e-24	0.104426	0	4.80786e-06	0.0151526	3.56704e-24	0.104524	0	4.85525e-06	0.0098545	0.00516233	0.0127797	0.000742317	0.0246353
adenoviridae	Cynogale bennettii	Carnivora	Viverridae	FALSE	0	0.124552	0.330265	2.39677e-27	0.304546	0	0.729378	0.124651	2.41496e-27	0.304737	0	0.730976	0.0178815	0.0113021	0.0213807	0.002009	0.0404879
adenoviridae	Cynomops abrasus	Chiroptera	Molossidae	FALSE	0	0.550136	0.496877	0.793126	0.422533	7.64222e-10	0.969797	0.561999	0.823074	0.428035	1.03665e-09	0.974086	0.161205	0.156643	0.0503053	0.101611	0.226891
adenoviridae	Cynomops greenhalli	Chiroptera	Molossidae	FALSE	0	0.519016	0.499232	0.774761	0.429328	4.11754e-13	0.95786	0.519561	0.775153	0.429645	4.14575e-13	0.958232	0.00727599	0.00508869	0.0074898	0.00100521	0.0160742
adenoviridae	Cynomops mexicanus	Chiroptera	Molossidae	FALSE	0	0.512265	0.499687	0.750479	0.418533	1.16391e-11	0.945142	0.512546	0.750722	0.418719	1.16448e-11	0.945312	0.0038618	0.00277053	0.00392517	0.000528679	0.00848536
adenoviridae	Cynomops milleri	Chiroptera	Molossidae	FALSE	0	0.558379	0.496326	0.841599	0.445295	4.7438e-12	0.978821	0.558608	0.841974	0.445452	4.75365e-12	0.978952	0.00496882	0.00353365	0.00505567	0.000676922	0.0108217
adenoviridae	Cynomops paranus	Chiroptera	Molossidae	FALSE	0	0.565902	0.495423	0.836764	0.439404	1.76426e-10	0.975361	0.566329	0.837092	0.439679	1.76467e-10	0.975547	0.00769917	0.00535204	0.00793988	0.0010546	0.0171307
adenoviridae	Cynomops planirostris	Chiroptera	Molossidae	FALSE	0	0.625042	0.483785	0.884387	0.424896	5.09802e-09	0.980847	0.634429	0.898724	0.429168	6.90897e-09	0.983303	0.163693	0.158979	0.0509884	0.103329	0.23054
adenoviridae	Cynomys gunnisoni	Rodentia	Sciuridae	FALSE	0	0.867091	0.339142	0.904241	0.19012	0.786595	0.991083	0.87069	0.906127	0.189775	0.798166	0.991266	0.0378983	0.0305556	0.0270645	0.0144632	0.0702762
adenoviridae	Cynomys leucurus	Rodentia	Sciuridae	FALSE	0	0.879976	0.323671	0.956004	0.242156	0.84146	0.998683	0.880929	0.95683	0.242151	0.842254	0.998694	0.0181983	0.0148039	0.012764	0.00689608	0.033548
adenoviridae	Cynomys ludovicianus	Rodentia	Sciuridae	FALSE	0	0.949625	0.217945	0.986107	0.1208	0.892472	0.999999	0.957562	0.989121	0.117651	0.914828	0.999999	0.19958	0.17619	0.101415	0.0943628	0.343648
adenoviridae	Cynomys mexicanus	Rodentia	Sciuridae	FALSE	0	0.875975	0.334312	0.948481	0.231716	0.836407	0.996869	0.876884	0.949698	0.231738	0.838254	0.997001	0.0155332	0.0124098	0.0114145	0.00569413	0.0284633
adenoviridae	Cynomys parvidens	Rodentia	Sciuridae	FALSE	0	0.895743	0.305131	0.932032	0.152908	0.804185	0.985032	0.897106	0.936188	0.152622	0.807491	0.985355	0.0158044	0.0126496	0.0115447	0.0058205	0.0290532
adenoviridae	Cynopterus brachyotis	Chiroptera	Pteropodidae	FALSE	0	0.909957	0.286468	0.968462	0.134195	0.704477	0.999958	0.95804	0.987479	0.0742038	0.866284	0.999979	0.582602	0.588481	0.0952774	0.458962	0.699384
adenoviridae	Cynopterus horsfieldii	Chiroptera	Pteropodidae	FALSE	0	0.794304	0.403042	0.953721	0.326978	0.0459082	0.999882	0.79944	0.959161	0.326088	0.0529228	0.999892	0.0817476	0.0794672	0.0247103	0.0528176	0.113035
adenoviridae	Cynopterus luzoniensis	Chiroptera	Pteropodidae	FALSE	0	0.47001	0.49937	0.656148	0.425741	1.16529e-10	0.947501	0.470353	0.656934	0.425991	1.18938e-10	0.947885	0.0049957	0.00350882	0.00489858	0.000717869	0.0113115
adenoviridae	Cynopterus minutus	Chiroptera	Pteropodidae	FALSE	0	0.744958	0.437035	0.926814	0.359929	6.84057e-05	0.999308	0.745537	0.926929	0.359972	6.88129e-05	0.99931	0.00748844	0.00513213	0.00750483	0.00110225	0.0170954
adenoviridae	Cynopterus nusatenggara	Chiroptera	Pteropodidae	FALSE	0	0.267491	0.442129	0.000174093	0.367167	3.99531e-19	0.863329	0.267698	0.000174971	0.367329	4.0107e-19	0.863805	0.00345891	0.00250524	0.00334289	0.000499977	0.00779469
adenoviridae	Cynopterus sphinx	Chiroptera	Pteropodidae	TRUE	1	1	0	1	0	1	1	0.982786	0.998395	0.0337656	0.948975	0.999998	0.819151	0.836289	0.0980649	0.685828	0.931209
adenoviridae	Cynopterus titthaecheilus	Chiroptera	Pteropodidae	FALSE	0	0.754309	0.431677	0.903913	0.347421	1.75175e-05	0.999656	0.75467	0.904416	0.347412	1.75552e-05	0.999663	0.0058182	0.00405529	0.00575357	0.00085624	0.0132504
adenoviridae	Cyttarops alecto	Chiroptera	Emballonuridae	FALSE	0	0.441407	0.496129	0.485881	0.428869	3.80546e-12	0.917607	0.441782	0.486093	0.429159	3.81917e-12	0.917667	0.00502997	0.00347296	0.00523154	0.00064517	0.0115325
adenoviridae	Dacnomys millardi	Rodentia	Muridae	FALSE	0	0.908561	0.28431	0.9154	0.0600202	0.841324	0.97877	0.909582	0.916481	0.0593942	0.843334	0.979047	0.014587	0.0135571	0.00617033	0.00780989	0.0225986
adenoviridae	Dactylomys boliviensis	Rodentia	Echimyidae	FALSE	0	0.00913267	0.0907255	9.27878e-30	0.0783581	0	8.86959e-09	0.00914981	9.40823e-30	0.0785046	0	8.88672e-09	0.00743773	0.00524269	0.00710453	0.00118893	0.0165
adenoviridae	Dactylomys dactylinus	Rodentia	Echimyidae	FALSE	0	0.0226211	0.156732	3.04749e-21	0.133731	0	2.2366e-05	0.0226525	3.09536e-21	0.133874	0	2.29193e-05	0.0122998	0.00871483	0.0124245	0.00192563	0.0267177
adenoviridae	Dactylomys peruanus	Rodentia	Echimyidae	FALSE	0	0.00767117	0.0797436	1.91192e-37	0.0659558	0	1.4107e-09	0.00768672	1.91233e-37	0.0660895	0	1.41346e-09	0.00591667	0.0043164	0.00553576	0.000904261	0.0130786
adenoviridae	Dactylonax palpator	Diprotodontia	Petauridae	FALSE	0	0.00855933	0.0939191	0	0.0736301	0	5.42239e-30	0.00858295	0	0.0738333	0	5.55247e-30	0.00761779	0.00377448	0.0108978	0.000531317	0.0181973
adenoviridae	Dactylopsila megalura	Diprotodontia	Petauridae	FALSE	0	6.098e-19	0	0	5.24569e-18	0	0	6.11099e-19	0	5.25687e-18	0	0	0.00681715	0.00339787	0.00979291	0.000460436	0.0163312
adenoviridae	Dactylopsila tatei	Diprotodontia	Petauridae	FALSE	0	1.37457e-05	0	0	0.000117974	0	1.11025e-32	1.37746e-05	0	0.00011822	0	1.1138e-32	0.00660834	0.00330439	0.00950848	0.000447916	0.0158689
adenoviridae	Dactylopsila trivirgata	Diprotodontia	Petauridae	FALSE	0	2.83991e-23	0	0	1.75581e-22	0	3.46537e-34	2.86526e-23	0	1.75581e-22	0	3.47424e-34	0.00994019	0.00500656	0.0141657	0.00067426	0.0233357
adenoviridae	Dama dama	Cetartiodactyla	Cervidae	TRUE	1	1	0	1	0	1	1	0.984042	0.997048	0.0270425	0.951713	0.999984	0.837291	0.87301	0.127228	0.655279	0.969139
adenoviridae	Dama mesopotamica	Cetartiodactyla	Cervidae	FALSE	0	0.877554	0.331737	0.927102	0.168535	0.791323	0.989943	0.877966	0.927396	0.168439	0.791696	0.989994	0.00602872	0.00325699	0.007766	0.000460874	0.0144097
adenoviridae	Damaliscus lunatus	Cetartiodactyla	Bovidae	FALSE	0	0.903338	0.29893	0.961977	0.155519	0.73925	0.997937	0.950074	0.978812	0.119791	0.905219	0.999344	0.491886	0.508709	0.246606	0.138429	0.810191
adenoviridae	Damaliscus pygargus	Cetartiodactyla	Bovidae	FALSE	0	0.930765	0.257658	0.980381	0.168354	0.874433	0.999933	0.940153	0.985657	0.163796	0.9036	0.999956	0.220395	0.182208	0.162337	0.0463447	0.449265
adenoviridae	Dasycercus blythi	Dasyuromorphia	Dasyuridae	FALSE	0	0.144758	0.352202	5.95819e-13	0.294174	8.40735e-34	0.738193	0.145151	6.0473e-13	0.294935	8.71617e-34	0.74497	0.0157041	0.0109059	0.0156806	0.00299619	0.0340806
adenoviridae	Dasycercus cristicauda	Dasyuromorphia	Dasyuridae	FALSE	0	0.161767	0.372976	1.14559e-13	0.302621	1.83293e-35	0.740414	0.162566	1.1968e-13	0.303894	1.8675e-35	0.747243	0.0270378	0.014913	0.0314696	0.00415161	0.0652628
adenoviridae	Dasykaluta rosamondae	Dasyuromorphia	Dasyuridae	FALSE	0	0.0111889	0.110221	0	0.0962005	0	4.77058e-14	0.0112224	0	0.0964879	0	4.84626e-14	0.0142086	0.00972622	0.0143191	0.00272571	0.0308464
adenoviridae	Dasymys foxi	Rodentia	Muridae	FALSE	0	0.911232	0.279328	0.952485	0.160411	0.825254	0.996047	0.911899	0.952927	0.160304	0.82732	0.996103	0.0136374	0.01274	0.0057885	0.00737181	0.0212012
adenoviridae	Dasymys incomtus	Rodentia	Muridae	FALSE	0	0.968852	0.174127	0.991342	0.095686	0.937228	0.998818	0.972389	0.992521	0.0916961	0.953992	0.999063	0.157754	0.138763	0.0721082	0.0849826	0.254997
adenoviridae	Dasymys nudipes	Rodentia	Muridae	FALSE	0	0.381817	0.485534	0.0609953	0.400912	6.64711e-15	0.872237	0.382685	0.0618898	0.401644	6.73289e-15	0.873433	0.0140649	0.0130932	0.00595614	0.00752018	0.0218538
adenoviridae	Dasymys rufulus	Rodentia	Muridae	TRUE	1	1	0	1	0	1	1	0.975144	0.982472	0.0248901	0.936246	0.998677	0.0303549	0.0274806	0.0145391	0.0147822	0.0489325
adenoviridae	Dasyprocta azarae	Rodentia	Dasyproctidae	FALSE	0	0.558826	0.497108	0.83009	0.444149	4.56077e-14	0.988557	0.559722	0.830297	0.444626	4.67226e-14	0.988684	0.0172138	0.0120684	0.0192869	0.00230404	0.0361409
adenoviridae	Dasyprocta coibae	Rodentia	Dasyproctidae	FALSE	0	0.0516278	0.222027	1.2002e-23	0.189761	0	5.50103e-05	0.0516838	1.20804e-23	0.189885	0	5.52938e-05	0.00906129	0.00615931	0.00956861	0.00133143	0.019642
adenoviridae	Dasyprocta croconota	Rodentia	Dasyproctidae	FALSE	0	0.464185	0.498897	0.714293	0.458725	3.6131e-13	0.974454	0.46453	0.715288	0.459021	3.64713e-13	0.974592	0.0111684	0.00771446	0.012057	0.00160978	0.02419
adenoviridae	Dasyprocta fuliginosa	Rodentia	Dasyproctidae	FALSE	0	0.710691	0.454545	0.941221	0.402478	1.90093e-05	0.996492	0.71238	0.942111	0.402266	2.05081e-05	0.996589	0.0408476	0.034356	0.0277647	0.0161025	0.0726296
adenoviridae	Dasyprocta guamara	Rodentia	Dasyproctidae	FALSE	0	0.325106	0.467014	5.26503e-06	0.425607	7.38684e-20	0.94713	0.325393	5.26963e-06	0.425927	7.4114e-20	0.947496	0.0090936	0.0061952	0.00960599	0.00133574	0.019755
adenoviridae	Dasyprocta iacki	Rodentia	Dasyproctidae	FALSE	0	0.404949	0.491594	0.0240009	0.439981	5.55373e-12	0.958419	0.405303	0.0240758	0.440269	5.59945e-12	0.958803	0.0111412	0.00769747	0.0120244	0.00160438	0.0241154
adenoviridae	Dasyprocta kalinowskii	Rodentia	Dasyproctidae	FALSE	0	0.256811	0.44037	5.42641e-05	0.387256	4.32616e-18	0.902817	0.257105	5.43639e-05	0.387602	4.3457e-18	0.903547	0.00938474	0.00643675	0.00994432	0.00137276	0.020349
adenoviridae	Dasyprocta leporina	Rodentia	Dasyproctidae	FALSE	1	1	0	1	0	1	1	0.93861	0.968894	0.0850881	0.851754	0.999406	0.0814184	0.0686433	0.0504629	0.0340944	0.1492
adenoviridae	Dasyprocta mexicana	Rodentia	Dasyproctidae	FALSE	0	0.272202	0.4437	4.53174e-08	0.401202	2.77938e-25	0.919511	0.272494	4.61924e-08	0.401534	2.79139e-25	0.919778	0.0105314	0.00729957	0.0112966	0.00150429	0.02278
adenoviridae	Dasyprocta prymnolopha	Rodentia	Dasyproctidae	FALSE	0	0.485725	0.499704	0.78137	0.454197	1.20357e-15	0.976468	0.486545	0.784461	0.454829	1.21463e-15	0.976734	0.0184889	0.0130006	0.0207853	0.00246128	0.0393462
adenoviridae	Dasyprocta punctata	Rodentia	Dasyproctidae	FALSE	0	0.334723	0.4683	2.3371e-05	0.429201	5.98891e-12	0.96049	0.337422	2.45109e-05	0.431566	6.14408e-12	0.962229	0.0721066	0.0602435	0.0452823	0.0298484	0.131692
adenoviridae	Dasyprocta ruatanica	Rodentia	Dasyproctidae	FALSE	0	0.294196	0.455682	1.46048e-05	0.404564	8.36086e-19	0.927185	0.294477	1.48358e-05	0.404807	8.38602e-19	0.927408	0.00905733	0.0061549	0.00956403	0.00133098	0.0196303
adenoviridae	Dasyprocta variegata	Rodentia	Dasyproctidae	FALSE	0	0.322141	0.464952	2.77615e-05	0.413654	1.43417e-22	0.914895	0.322531	2.81307e-05	0.41406	1.44541e-22	0.915187	0.011255	0.00775607	0.0121606	0.00162697	0.024427
adenoviridae	Dasypus hybridus	Cingulata	Dasypodidae	FALSE	0	0.556133	0.497075	0.838597	0.450549	3.23205e-28	0.998779	0.556672	0.839243	0.45082	3.33404e-28	0.998784	0.0133666	0.00761111	0.0177501	0.0010557	0.0307195
adenoviridae	Dasypus kappleri	Cingulata	Dasypodidae	FALSE	0	0.258458	0.43836	8.95478e-15	0.417547	0	0.98651	0.258728	9.09417e-15	0.417901	0	0.98658	0.0194684	0.0109073	0.0251977	0.00148736	0.0440376
adenoviridae	Dasypus novemcinctus	Cingulata	Dasypodidae	FALSE	0	0.817435	0.387729	0.976861	0.329177	0.000183413	0.999997	0.823251	0.977803	0.329912	0.000237942	0.999998	0.150022	0.0748071	0.180206	0.00899491	0.413872
adenoviridae	Dasypus pilosus	Cingulata	Dasypodidae	FALSE	0	0.11435	0.323317	1.39692e-19	0.299794	0	0.791532	0.114389	1.40304e-19	0.299887	0	0.79189	0.00789928	0.00462882	0.0110659	0.000614937	0.018679
adenoviridae	Dasypus sabanicola	Cingulata	Dasypodidae	FALSE	0	0.129183	0.336523	4.3463e-17	0.313674	0	0.811875	0.129301	4.34788e-17	0.313916	0	0.813751	0.00935672	0.0054292	0.0128215	0.000750388	0.0218401
adenoviridae	Dasypus septemcinctus	Cingulata	Dasypodidae	FALSE	0	0.625418	0.48466	0.876697	0.438831	2.75274e-17	0.999664	0.626271	0.877337	0.439153	2.77835e-17	0.999666	0.0193262	0.0108139	0.0250264	0.00147493	0.0437219
adenoviridae	Dasypus yepesi	Cingulata	Dasypodidae	FALSE	0	0.286435	0.451652	4.22845e-10	0.430391	0	0.99479	0.286554	4.23418e-10	0.430546	0	0.994834	0.00784618	0.00459577	0.0110029	0.000608002	0.0186027
adenoviridae	Dasyuroides byrnei	Dasyuromorphia	Dasyuridae	TRUE	1	1	0	1	0	1	1	0.804621	0.800319	0.125486	0.619031	0.981809	0.013359	0.00911009	0.0135629	0.00249467	0.0288315
adenoviridae	Dasyurus albopunctatus	Dasyuromorphia	Dasyuridae	FALSE	0	4.10371e-13	0	0	3.33012e-12	0	7.46234e-30	4.17587e-13	0	3.3876e-12	0	7.518e-30	0.0185547	0.0127058	0.0183456	0.00346857	0.0413955
adenoviridae	Dasyurus geoffroii	Dasyuromorphia	Dasyuridae	FALSE	0	0.493606	0.499995	0.709632	0.415969	3.46291e-19	0.980632	0.494894	0.710562	0.416588	3.63233e-19	0.980957	0.0174318	0.0119728	0.0172877	0.00328117	0.0384091
adenoviridae	Dasyurus hallucatus	Dasyuromorphia	Dasyuridae	FALSE	0	0.129011	0.331849	1.22627e-12	0.285129	0	0.73356	0.129366	1.29326e-12	0.285808	0	0.735256	0.0158286	0.0109947	0.0157953	0.00301454	0.0344832
adenoviridae	Dasyurus maculatus	Dasyuromorphia	Dasyuridae	FALSE	0	0.318935	0.465778	6.18222e-08	0.429142	0	0.969877	0.319517	6.38416e-08	0.429779	0	0.9703	0.0274422	0.0190441	0.0268361	0.00496661	0.0616234
adenoviridae	Dasyurus spartacus	Dasyuromorphia	Dasyuridae	FALSE	0	9.90545e-08	0	0	8.41626e-07	0	2.89234e-21	9.96512e-08	0	8.46672e-07	0	2.91928e-21	0.0135792	0.0092311	0.0137575	0.00256093	0.0294842
adenoviridae	Dasyurus viverrinus	Dasyuromorphia	Dasyuridae	FALSE	0	0.225836	0.41679	1.95753e-09	0.386178	0	0.961567	0.226204	2.03459e-09	0.386668	0	0.962338	0.0228804	0.0157318	0.0224697	0.00419101	0.0514409
adenoviridae	Daubentonia madagascariensis	Primates	Daubentoniidae	FALSE	0	0.753475	0.433416	0.915426	0.358417	3.98941e-06	0.998199	0.755225	0.919051	0.358545	4.03063e-06	0.998295	0.0344609	0.0263882	0.0302574	0.0049606	0.0743933
adenoviridae	Delanymys brooksi	Rodentia	Nesomyidae	FALSE	0	0.178453	0.383687	1.66341e-12	0.335105	0	0.83436	0.178636	1.68242e-12	0.335411	0	0.83594	0.00747106	0.00578466	0.00670919	0.00141443	0.0158725
adenoviridae	Delomys collinus	Rodentia	Cricetidae	FALSE	0	0.390654	0.488915	0.324364	0.382238	8.09443e-12	0.883355	0.39098	0.325857	0.382474	8.11533e-12	0.883533	0.00409449	0.00290202	0.00396604	0.000594182	0.00896548
adenoviridae	Delomys dorsalis	Rodentia	Cricetidae	FALSE	0	0.443172	0.497172	0.605501	0.391569	1.10395e-10	0.898661	0.443634	0.606145	0.391836	1.10809e-10	0.898957	0.00524331	0.00362703	0.00506011	0.000747853	0.0113159
adenoviridae	Delomys sublineatus	Rodentia	Cricetidae	FALSE	0	0.371606	0.483994	0.175746	0.383774	7.55875e-13	0.847649	0.371929	0.176504	0.384048	7.63937e-13	0.847774	0.00458216	0.0031815	0.00442059	0.000668316	0.00985339
adenoviridae	Dendrogale melanura	Scandentia	Tupaiidae	FALSE	0	0.00765906	0.0857044	0	0.0655146	0	6.62989e-09	0.00766286	0	0.0655446	0	6.7839e-09	0.0073899	0.00457973	0.00855952	0.000704489	0.0175217
adenoviridae	Dendrogale murina	Scandentia	Tupaiidae	FALSE	0	0.492023	0.499854	0.681282	0.443183	6.77955e-31	0.998901	0.492501	0.684183	0.443447	6.84714e-31	0.998909	0.00945119	0.00588294	0.0110998	0.000865118	0.0224795
adenoviridae	Dendrohyrax arboreus	Hyracoidea	Procaviidae	FALSE	0	0.375851	0.48461	4.18139e-06	0.452826	0	0.985908	0.376456	4.29308e-06	0.453385	0	0.986146	0.0188608	0.0100764	0.0257091	0.00140968	0.0442829
adenoviridae	Dendrohyrax dorsalis	Hyracoidea	Procaviidae	FALSE	0	0.220974	0.415591	4.62936e-19	0.383239	0	0.947614	0.221239	4.69619e-19	0.383567	0	0.947731	0.0220903	0.0118121	0.0298661	0.00167159	0.0521977
adenoviridae	Dendrohyrax validus	Hyracoidea	Procaviidae	FALSE	0	0.36575	0.482561	1.41043e-05	0.444285	0	0.992305	0.366063	1.41682e-05	0.444553	0	0.992406	0.00947351	0.00505309	0.013168	0.000758304	0.0222778
adenoviridae	Dendrolagus bennettianus	Diprotodontia	Macropodidae	FALSE	0	0.117089	0.32142	2.6086e-14	0.285773	3.95504e-39	0.75073	0.117147	2.63735e-14	0.285912	3.97052e-39	0.750923	0.00533023	0.00295934	0.00694357	0.000431134	0.0124253
adenoviridae	Dendrolagus dorianus	Diprotodontia	Macropodidae	FALSE	0	0.171573	0.375808	6.39503e-14	0.335084	0	0.834978	0.171666	6.41105e-14	0.335233	0	0.835994	0.00547406	0.00304012	0.00712809	0.000442628	0.0127441
adenoviridae	Dendrolagus goodfellowi	Diprotodontia	Macropodidae	FALSE	0	0.41552	0.492945	0.448097	0.394923	1.84069e-09	0.89836	0.416425	0.455422	0.395397	1.85125e-09	0.900001	0.0134765	0.00692014	0.0204282	0.00129524	0.0325149
adenoviridae	Dendrolagus inustus	Diprotodontia	Macropodidae	FALSE	0	0.329637	0.47086	0.00110097	0.398165	5.34725e-13	0.918503	0.329964	0.00111491	0.398412	5.34911e-13	0.918821	0.00605031	0.00341984	0.00787863	0.000486156	0.0141724
adenoviridae	Dendrolagus lumholtzi	Diprotodontia	Macropodidae	FALSE	0	0.16173	0.369366	7.37574e-09	0.323274	6.99695e-27	0.849013	0.161825	7.37776e-09	0.323429	7.03584e-27	0.85002	0.00535737	0.00296945	0.00697829	0.000434305	0.0124855
adenoviridae	Dendrolagus matschiei	Diprotodontia	Macropodidae	FALSE	0	0.388841	0.486924	0.0434681	0.401276	2.81649e-10	0.912671	0.38914	0.0435396	0.401548	2.82024e-10	0.912914	0.00536309	0.00297158	0.00698561	0.000434973	0.0124981
adenoviridae	Dendrolagus mbaiso	Diprotodontia	Macropodidae	FALSE	0	0.183074	0.382933	1.34981e-08	0.341157	2.4643e-25	0.858841	0.183197	1.35269e-08	0.341314	2.46995e-25	0.859058	0.00529566	0.00294235	0.00689942	0.000427096	0.0123487
adenoviridae	Dendrolagus notatus	Diprotodontia	Macropodidae	FALSE	0	0.151519	0.358924	9.57892e-16	0.322246	0	0.78673	0.151615	9.58731e-16	0.322417	0	0.787276	0.00571792	0.00318238	0.00744369	0.000459013	0.0134279
adenoviridae	Dendrolagus pulcherrimus	Diprotodontia	Macropodidae	FALSE	0	0.350803	0.479264	0.0413555	0.390488	1.17736e-10	0.882158	0.351115	0.0413709	0.390748	1.17852e-10	0.882892	0.00528169	0.00293513	0.00688159	0.000425464	0.0123177
adenoviridae	Dendrolagus scottae	Diprotodontia	Macropodidae	FALSE	0	0.264799	0.442445	8.02226e-06	0.38265	3.20011e-18	0.864836	0.26499	8.02947e-06	0.382902	3.20365e-18	0.865601	0.0052849	0.00293679	0.0068857	0.00042584	0.0123248
adenoviridae	Dendrolagus spadix	Diprotodontia	Macropodidae	FALSE	0	0.288516	0.450553	0.00217917	0.37543	1.11139e-14	0.849166	0.288748	0.00220794	0.375682	1.11187e-14	0.850193	0.005498	0.00305503	0.00715892	0.000443703	0.0128298
adenoviridae	Dendrolagus stellarum	Diprotodontia	Macropodidae	FALSE	0	0.29369	0.454453	0.000171056	0.390593	6.00227e-15	0.901098	0.293933	0.00017219	0.390834	6.02111e-15	0.901197	0.00540758	0.00301013	0.00704265	0.000439641	0.0125968
adenoviridae	Dendrolagus ursinus	Diprotodontia	Macropodidae	FALSE	0	0.255601	0.433243	3.76939e-06	0.393644	5.48316e-23	0.933997	0.25574	3.80511e-06	0.393806	5.49637e-23	0.934622	0.00540465	0.00300917	0.00703888	0.00043951	0.0125903
adenoviridae	Dendromus insignis	Rodentia	Nesomyidae	FALSE	0	0.825447	0.380224	0.928096	0.292079	0.262646	0.990807	0.829433	0.934515	0.292475	0.280216	0.991209	0.0644792	0.0528207	0.0446667	0.021829	0.118475
adenoviridae	Dendromus kahuziensis	Rodentia	Nesomyidae	FALSE	0	0.14255	0.351394	2.32324e-12	0.306278	0	0.750291	0.142702	2.33024e-12	0.306558	0	0.751393	0.00717313	0.00553574	0.00646979	0.00134129	0.0151282
adenoviridae	Dendromus kivu	Rodentia	Nesomyidae	FALSE	0	0.694246	0.460703	0.858815	0.344828	1.50074e-05	0.949157	0.695004	0.859358	0.345013	1.51148e-05	0.949374	0.00937574	0.00719403	0.00831505	0.00174131	0.0202278
adenoviridae	Dendromus lovati	Rodentia	Nesomyidae	FALSE	0	0.0859988	0.281688	9.98214e-12	0.23027	1.42675e-26	0.495521	0.0861764	1.00591e-11	0.230645	1.43479e-26	0.496736	0.00809245	0.00631459	0.00722048	0.00155317	0.0171463
adenoviridae	Dendromus melanotis	Rodentia	Nesomyidae	FALSE	0	0.247457	0.433474	1.81721e-05	0.355289	3.67737e-19	0.811265	0.248283	1.83161e-05	0.356243	3.73399e-19	0.812562	0.0173977	0.0128883	0.0155803	0.00321989	0.0387266
adenoviridae	Dendromus mesomelas	Rodentia	Nesomyidae	FALSE	0	0.219931	0.417253	3.83209e-06	0.343693	1.52207e-17	0.817088	0.220353	3.87987e-06	0.34426	1.52426e-17	0.818413	0.0101614	0.00764799	0.0090034	0.00186038	0.0220589
adenoviridae	Dendromus messorius	Rodentia	Nesomyidae	FALSE	0	0.35018	0.476272	0.00187257	0.404997	5.01537e-25	0.904474	0.35058	0.0019066	0.405308	5.03867e-25	0.90497	0.00831865	0.00643959	0.00741004	0.00159184	0.017823
adenoviridae	Dendromus mystacalis	Rodentia	Nesomyidae	FALSE	0	0.302163	0.458953	0.000149142	0.388551	1.69394e-19	0.854213	0.302999	0.000150398	0.389271	1.75417e-19	0.855765	0.0167219	0.0124894	0.0149601	0.00308416	0.0371896
adenoviridae	Dendromus nyikae	Rodentia	Nesomyidae	FALSE	0	0.366847	0.481205	0.0135964	0.401696	1.05916e-12	0.899072	0.367523	0.0138883	0.402243	1.06655e-12	0.900363	0.0128177	0.00951293	0.0113882	0.00238209	0.0281684
adenoviridae	Dendromus oreas	Rodentia	Nesomyidae	FALSE	0	0.345526	0.475661	0.000500581	0.40985	2.28777e-30	0.918142	0.345865	0.000504037	0.410107	2.30219e-30	0.918627	0.00731252	0.00566711	0.00658128	0.0013742	0.0154411
adenoviridae	Dendromus vernayi	Rodentia	Nesomyidae	FALSE	0	0.0541611	0.226609	5.39619e-15	0.191265	7.02553e-34	0.029131	0.0542547	5.42841e-15	0.191505	7.05863e-34	0.0294456	0.00716257	0.00553235	0.00646138	0.0013388	0.0151153
adenoviridae	Dendroprionomys rousseloti	Rodentia	Nesomyidae	FALSE	0	0.192485	0.391429	1.09215e-08	0.329264	0	0.774373	0.192716	1.09786e-08	0.32957	0	0.774909	0.0071646	0.005533	0.006463	0.00133928	0.0151174
adenoviridae	Dermanura anderseni	Chiroptera	Phyllostomidae	FALSE	0	0.682282	0.463875	0.829162	0.350779	2.31244e-05	0.960603	0.682624	0.829347	0.350893	2.32484e-05	0.960686	0.00497638	0.00376523	0.00437234	0.000812535	0.0109035
adenoviridae	Dermanura azteca	Chiroptera	Phyllostomidae	FALSE	0	0.786911	0.408725	0.81529	0.212862	0.680109	0.963409	0.787252	0.815901	0.212847	0.681173	0.963636	0.0035396	0.00264861	0.00312181	0.0005736	0.00785377
adenoviridae	Dermanura bogotensis	Chiroptera	Phyllostomidae	FALSE	0	0.640386	0.479323	0.80312	0.355366	1.64084e-06	0.941527	0.640577	0.803428	0.355419	1.64182e-06	0.94187	0.00260375	0.0019137	0.00235688	0.000418081	0.00574826
adenoviridae	Dermanura cinerea	Chiroptera	Phyllostomidae	FALSE	0	0.898314	0.305131	0.922525	0.120973	0.779734	0.994074	0.91037	0.933904	0.114659	0.809308	0.994846	0.148261	0.143441	0.0431298	0.0971821	0.207327
adenoviridae	Dermanura glauca	Chiroptera	Phyllostomidae	FALSE	0	0.701549	0.459211	0.833134	0.327154	0.00229872	0.959684	0.707124	0.840493	0.328442	0.002545	0.961275	0.0563841	0.0540411	0.0186461	0.0344857	0.0808464
adenoviridae	Dermanura gnoma	Chiroptera	Phyllostomidae	FALSE	0	0.701414	0.459512	0.829673	0.33635	0.000241797	0.959933	0.701841	0.830137	0.336459	0.000242954	0.96014	0.00598546	0.00461438	0.00527236	0.000971432	0.0133196
adenoviridae	Dermanura phaeotis	Chiroptera	Phyllostomidae	FALSE	0	0.700114	0.457468	0.77399	0.279074	0.0351636	0.948563	0.764775	0.867541	0.28696	0.0642841	0.967774	0.432592	0.435081	0.0933421	0.310992	0.551932
adenoviridae	Dermanura rava	Chiroptera	Phyllostomidae	FALSE	0	0.286312	0.450312	0.000112208	0.356123	1.03564e-13	0.808693	0.286505	0.000112394	0.35634	1.04327e-13	0.808998	0.00328978	0.0024577	0.00291175	0.000538283	0.0072983
adenoviridae	Dermanura rosenbergi	Chiroptera	Phyllostomidae	FALSE	0	0.238331	0.420447	5.5437e-07	0.341329	3.05288e-23	0.761769	0.238454	5.56556e-07	0.341481	3.05773e-23	0.762096	0.00286752	0.00211645	0.00256555	0.000465182	0.00623893
adenoviridae	Dermanura tolteca	Chiroptera	Phyllostomidae	FALSE	0	0.803332	0.395506	0.850256	0.209156	0.692731	0.971608	0.816735	0.858104	0.207284	0.717703	0.975208	0.113422	0.109357	0.035321	0.070007	0.161301
adenoviridae	Dermanura watsoni	Chiroptera	Phyllostomidae	FALSE	0	0.298061	0.457203	0.00350267	0.354349	6.24766e-16	0.8029	0.298292	0.00350891	0.354577	6.26694e-16	0.803801	0.00375305	0.00283084	0.00330363	0.000610543	0.00828734
adenoviridae	Desmodilliscus braueri	Rodentia	Muridae	FALSE	0	0.130535	0.337946	4.29027e-11	0.288604	1.81668e-34	0.770187	0.130954	4.44085e-11	0.289411	1.83667e-34	0.772718	0.0198975	0.0183767	0.00873602	0.0103161	0.0313066
adenoviridae	Desmodillus auricularis	Rodentia	Muridae	FALSE	0	0.617286	0.487885	0.861539	0.40587	4.50776e-06	0.976879	0.62317	0.870561	0.407256	4.91204e-06	0.978517	0.0831184	0.072659	0.0392164	0.0445202	0.134597
adenoviridae	Desmodus rotundus	Chiroptera	Phyllostomidae	TRUE	1	1	0	1	0	1	1	0.992163	0.999929	0.0250432	0.987351	1	0.845587	0.869213	0.111318	0.686974	0.971328
adenoviridae	Desmomys yaldeni	Rodentia	Muridae	FALSE	0	0.304918	0.460492	0.00165187	0.379309	1.49606e-11	0.862493	0.305667	0.00166497	0.380025	1.51415e-11	0.86358	0.0135343	0.0126437	0.0057492	0.00734411	0.0209915
adenoviridae	Diaemus youngi	Chiroptera	Phyllostomidae	FALSE	0	0.825983	0.379539	0.998139	0.347145	0.000102777	0.999999	0.832277	0.998662	0.346919	0.000140365	1	0.270576	0.26485	0.0676877	0.187805	0.362683
adenoviridae	Dicerorhinus sumatrensis	Perissodactyla	Rhinocerotidae	FALSE	0	0.701452	0.458039	0.942935	0.405937	6.00074e-13	0.999927	0.70196	0.943439	0.40616	6.01522e-13	0.999927	0.0206952	0.010474	0.0292251	0.00123153	0.0517728
adenoviridae	Diceros bicornis	Perissodactyla	Rhinocerotidae	FALSE	0	0.967059	0.177324	0.991367	0.0665319	0.915237	0.999994	0.97836	0.997389	0.0393714	0.943855	0.999994	0.28027	0.174778	0.277003	0.0152594	0.736913
adenoviridae	Diclidurus albus	Chiroptera	Emballonuridae	FALSE	0	0.596963	0.491538	0.867634	0.431605	3.80956e-08	0.988114	0.602287	0.884263	0.434094	4.30105e-08	0.989334	0.0928873	0.0889366	0.0271781	0.062171	0.128466
adenoviridae	Diclidurus ingens	Chiroptera	Emballonuridae	FALSE	0	0.528083	0.499616	0.809339	0.42936	1.24467e-12	0.950174	0.528564	0.811253	0.429667	1.24632e-12	0.950375	0.0064344	0.00448658	0.00671118	0.000799657	0.0146872
adenoviridae	Diclidurus isabella	Chiroptera	Emballonuridae	FALSE	0	0.538054	0.498531	0.821703	0.432167	1.28833e-11	0.961036	0.538466	0.822176	0.432402	1.29518e-11	0.961122	0.00561307	0.0038751	0.00584112	0.00070559	0.0127564
adenoviridae	Diclidurus scutatus	Chiroptera	Emballonuridae	FALSE	0	0.543803	0.498492	0.836758	0.433717	1.07963e-11	0.960172	0.544209	0.837617	0.433987	1.08433e-11	0.960296	0.00591774	0.00411698	0.00616262	0.000736636	0.0134194
adenoviridae	Dicrostonyx groenlandicus	Rodentia	Cricetidae	FALSE	0	0.674759	0.470465	0.738762	0.219072	0.593845	0.814024	0.678161	0.740357	0.21963	0.60172	0.81619	0.0185289	0.0144724	0.0142126	0.00646537	0.0347243
adenoviridae	Dicrostonyx hudsonius	Rodentia	Cricetidae	FALSE	0	0.203464	0.400449	3.21909e-08	0.356996	0	0.851013	0.203587	3.23092e-08	0.357165	0	0.851238	0.00378451	0.00269678	0.00368778	0.000553519	0.00831705
adenoviridae	Dicrostonyx nelsoni	Rodentia	Cricetidae	FALSE	0	0.668685	0.471815	0.73466	0.248618	0.0982423	0.850358	0.669321	0.734847	0.248769	0.0984133	0.850864	0.0037859	0.00269744	0.00368901	0.000553722	0.00831996
adenoviridae	Dicrostonyx nunatakensis	Rodentia	Cricetidae	FALSE	0	0.656792	0.473472	0.721851	0.245283	0.0890396	0.833362	0.657463	0.723047	0.245444	0.0892045	0.833831	0.00369664	0.00263489	0.00361078	0.000541805	0.00814937
adenoviridae	Dicrostonyx richardsoni	Rodentia	Cricetidae	FALSE	0	0.680113	0.466283	0.741596	0.233515	0.421611	0.846992	0.680786	0.742287	0.23361	0.423559	0.847385	0.00381237	0.00271074	0.00371239	0.000559249	0.00837503
adenoviridae	Dicrostonyx torquatus	Rodentia	Cricetidae	FALSE	0	0.335953	0.470285	0.0449918	0.372917	5.31233e-17	0.804789	0.336257	0.0450391	0.373191	5.36633e-17	0.805227	0.00435452	0.00302904	0.00420619	0.000628389	0.00947464
adenoviridae	Dicrostonyx unalascensis	Rodentia	Cricetidae	FALSE	0	0.412029	0.491997	0.552904	0.357396	3.13355e-07	0.809616	0.412412	0.552916	0.357664	3.13559e-07	0.809946	0.00359522	0.00256198	0.00352306	0.000524494	0.0079618
adenoviridae	Dicrostonyx vinogradovi	Rodentia	Cricetidae	FALSE	0	0.0214328	0.147333	0	0.121537	0	3.26187e-18	0.0214557	0	0.121642	0	3.26257e-18	0.00360169	0.00256619	0.00352861	0.000525449	0.00796815
adenoviridae	Didelphis albiventris	Didelphimorphia	Didelphidae	FALSE	0	0.905393	0.29799	0.918745	0.0875905	0.809214	0.997264	0.911897	0.925517	0.0833135	0.828029	0.997758	0.0828404	0.0259013	0.140082	0.00388743	0.258508
adenoviridae	Didelphis aurita	Didelphimorphia	Didelphidae	FALSE	0	0.905515	0.296502	0.942793	0.102768	0.772307	0.998823	0.908038	0.943023	0.100843	0.776922	0.99883	0.0367742	0.0128754	0.070565	0.00211182	0.0985481
adenoviridae	Didelphis imperfecta	Didelphimorphia	Didelphidae	FALSE	0	0.704911	0.455547	0.896358	0.391729	7.94989e-08	0.996686	0.705295	0.896583	0.391774	7.97944e-08	0.996693	0.00718686	0.00411659	0.00961784	0.000627131	0.0163558
adenoviridae	Didelphis marsupialis	Didelphimorphia	Didelphidae	FALSE	0	0.960379	0.195724	0.984308	0.05692	0.887223	0.999883	0.966226	0.990372	0.049657	0.916124	0.999888	0.152335	0.0576799	0.203539	0.00595109	0.476449
adenoviridae	Didelphis pernigra	Didelphimorphia	Didelphidae	FALSE	0	0.355576	0.478301	0.0053603	0.41267	7.61701e-15	0.916192	0.355904	0.00537731	0.413026	7.62518e-15	0.917512	0.00721744	0.00413471	0.00965933	0.000628584	0.0164218
adenoviridae	Didelphis virginiana	Didelphimorphia	Didelphidae	FALSE	0	0.949951	0.213978	0.976678	0.0618843	0.863227	0.999795	0.958336	0.981289	0.0525326	0.873899	0.999809	0.143852	0.0521781	0.196723	0.00534192	0.450475
adenoviridae	Dinaromys bogdanovi	Rodentia	Cricetidae	FALSE	0	0.312513	0.464913	5.47752e-05	0.383216	1.59048e-28	0.865933	0.312774	5.4788e-05	0.383462	1.60889e-28	0.866409	0.00394243	0.00279787	0.00382834	0.000574414	0.00862464
adenoviridae	Dinomys branickii	Rodentia	Dinomyidae	FALSE	0	0.54056	0.497925	0.839425	0.461218	2.04757e-33	0.999637	0.541054	0.843859	0.461518	2.05366e-33	0.999644	0.0137247	0.00939392	0.0133735	0.00214702	0.0293613
adenoviridae	Diomys crumpi	Rodentia	Muridae	FALSE	0	0.741221	0.43631	0.839114	0.276578	0.150187	0.934625	0.742508	0.841283	0.276704	0.151372	0.935316	0.0133481	0.012484	0.00567936	0.007249	0.0206827
adenoviridae	Diphylla ecaudata	Chiroptera	Phyllostomidae	FALSE	0	0.889505	0.31038	0.987243	0.246996	0.791431	0.999987	0.904243	0.991722	0.245834	0.851952	0.999991	0.364647	0.362513	0.0822836	0.260013	0.473281
adenoviridae	Diplogale hosei	Carnivora	Viverridae	FALSE	0	0.271896	0.444476	4.32961e-07	0.3772	1.36309e-32	0.845458	0.272188	4.43795e-07	0.377485	1.41092e-32	0.845795	0.00874233	0.00551025	0.0106374	0.000928653	0.0198759
adenoviridae	Diplomesodon pulchellum	Eulipotyphla	Soricidae	FALSE	0	0.0947159	0.290292	4.77672e-09	0.228223	1.53929e-34	0.454772	0.0948544	4.80593e-09	0.228413	1.55001e-34	0.456139	0.00621703	0.00463634	0.0061764	0.00138126	0.0124894
adenoviridae	Diplomys caniceps	Rodentia	Echimyidae	FALSE	0	0.0234443	0.150538	3.40325e-19	0.139477	0	2.07414e-06	0.023455	3.43726e-19	0.139528	0	2.08069e-06	0.00591812	0.00431723	0.0055372	0.000904515	0.0130812
adenoviridae	Diplomys labilis	Rodentia	Echimyidae	FALSE	0	0.211742	0.410475	4.38469e-06	0.355276	8.2338e-18	0.848885	0.212548	4.47347e-06	0.356048	8.31587e-18	0.851278	0.0214653	0.0176859	0.014825	0.00752325	0.0392225
adenoviridae	Diplothrix legata	Rodentia	Muridae	FALSE	0	0.0865552	0.277238	2.74905e-13	0.218184	1.91471e-31	0.378082	0.0868845	2.77805e-13	0.218881	1.93677e-31	0.380989	0.0135722	0.0126829	0.00576358	0.00735894	0.0210306
adenoviridae	Dipodomys agilis	Rodentia	Heteromyidae	FALSE	0	0.422432	0.494159	0.559018	0.407675	1.56907e-15	0.916885	0.423036	0.559217	0.40811	1.57084e-15	0.917243	0.00684718	0.00500613	0.00657151	0.00106913	0.0143756
adenoviridae	Dipodomys californicus	Rodentia	Heteromyidae	FALSE	0	0.603696	0.489339	0.809512	0.377081	2.33278e-06	0.911348	0.60588	0.812167	0.378129	2.39219e-06	0.912178	0.0192372	0.0158649	0.0135049	0.00681162	0.0359922
adenoviridae	Dipodomys compactus	Rodentia	Heteromyidae	FALSE	0	0.466367	0.498969	0.680765	0.390762	6.37479e-09	0.865655	0.466911	0.680929	0.391111	6.49775e-09	0.866161	0.00637908	0.00466415	0.00614698	0.000998829	0.0134543
adenoviridae	Dipodomys deserti	Rodentia	Heteromyidae	FALSE	0	0.774547	0.418239	0.821476	0.22878	0.675893	0.963119	0.775737	0.823748	0.228829	0.680617	0.963646	0.00786467	0.00578547	0.00752939	0.00121683	0.0164096
adenoviridae	Dipodomys elator	Rodentia	Heteromyidae	FALSE	0	0.621049	0.485608	0.773607	0.373964	7.24697e-07	0.966412	0.621724	0.773889	0.374215	7.3225e-07	0.966626	0.00624704	0.00457264	0.0060296	0.000962463	0.0131654
adenoviridae	Dipodomys gravipes	Rodentia	Heteromyidae	FALSE	0	0.606401	0.489857	0.777533	0.357019	5.74488e-06	0.907534	0.607184	0.780267	0.357327	5.78333e-06	0.907593	0.00629115	0.00460105	0.00606868	0.000974573	0.0132307
adenoviridae	Dipodomys heermanni	Rodentia	Heteromyidae	FALSE	0	0.561097	0.49666	0.76619	0.377427	7.517e-06	0.894261	0.563482	0.768897	0.378531	7.74432e-06	0.896304	0.0207921	0.0170467	0.0143583	0.0073778	0.0387536
adenoviridae	Dipodomys ingens	Rodentia	Heteromyidae	FALSE	0	0.42572	0.495491	0.686947	0.394518	5.58272e-13	0.846132	0.426326	0.690074	0.394995	5.63791e-13	0.846536	0.00671908	0.00488845	0.00645412	0.00106068	0.0142595
adenoviridae	Dipodomys merriami	Rodentia	Heteromyidae	FALSE	0	0.811072	0.39135	0.912323	0.287585	0.320605	0.998213	0.813552	0.915747	0.287571	0.326196	0.998312	0.0312839	0.0263619	0.0206721	0.0113302	0.0576989
adenoviridae	Dipodomys microps	Rodentia	Heteromyidae	FALSE	0	0.466707	0.498994	0.646312	0.444469	5.53448e-12	0.967677	0.46788	0.649478	0.445267	5.70043e-12	0.969133	0.022308	0.018417	0.0152206	0.00798628	0.0413174
adenoviridae	Dipodomys nelsoni	Rodentia	Heteromyidae	FALSE	0	0.473554	0.499511	0.711015	0.42606	1.0682e-19	0.96954	0.474087	0.711965	0.426409	1.06928e-19	0.969645	0.00729212	0.00535535	0.00698532	0.00112323	0.0154526
adenoviridae	Dipodomys nitratoides	Rodentia	Heteromyidae	FALSE	0	0.553877	0.496899	0.768262	0.387127	3.32326e-07	0.901282	0.555831	0.771346	0.388178	3.39241e-07	0.903066	0.0184026	0.0151637	0.0130624	0.00649353	0.0345168
adenoviridae	Dipodomys ordii	Rodentia	Heteromyidae	FALSE	0	0.81081	0.400972	0.929065	0.295626	0.153347	0.993645	0.815463	0.934716	0.295825	0.16102	0.99379	0.0657403	0.0552074	0.0432092	0.0241101	0.12102
adenoviridae	Dipodomys ornatus	Rodentia	Heteromyidae	FALSE	0	0.263394	0.438853	2.54383e-05	0.352013	1.55912e-17	0.786158	0.263817	2.56123e-05	0.352503	1.56016e-17	0.787219	0.00711579	0.00519235	0.00682026	0.00110264	0.0149054
adenoviridae	Dipodomys panamintinus	Rodentia	Heteromyidae	FALSE	0	0.294156	0.455773	9.39052e-06	0.39475	1.06425e-27	0.896794	0.294469	9.46117e-06	0.395044	1.07237e-27	0.897378	0.00668327	0.00486001	0.00642146	0.0010578	0.0142445
adenoviridae	Dipodomys phillipsii	Rodentia	Heteromyidae	FALSE	0	0.252774	0.434788	0.000213421	0.349104	1.02925e-15	0.78134	0.25315	0.000214001	0.349521	1.04424e-15	0.782577	0.00665903	0.00483845	0.0063994	0.00105379	0.0142297
adenoviridae	Dipodomys simulans	Rodentia	Heteromyidae	FALSE	0	0.696968	0.456625	0.780641	0.253352	0.198634	0.878774	0.700221	0.782164	0.254124	0.200277	0.880734	0.0197641	0.016279	0.0137901	0.00697227	0.0370097
adenoviridae	Dipodomys spectabilis	Rodentia	Heteromyidae	FALSE	0	0.837852	0.364272	0.869409	0.155908	0.709383	0.967691	0.840539	0.871487	0.155278	0.714641	0.968248	0.0217448	0.0179427	0.0148972	0.00777149	0.0404834
adenoviridae	Dipodomys stephensi	Rodentia	Heteromyidae	FALSE	0	0.576045	0.493831	0.753657	0.372089	2.07492e-07	0.931644	0.57683	0.756076	0.372471	2.08474e-07	0.932517	0.0063748	0.00466231	0.00614315	0.000997546	0.0134408
adenoviridae	Dipodomys venustus	Rodentia	Heteromyidae	FALSE	0	0.397702	0.487974	0.368248	0.40409	7.07503e-15	0.909811	0.398128	0.370056	0.404422	7.08086e-15	0.91006	0.00648173	0.00470837	0.00623899	0.00102607	0.0137729
adenoviridae	Dipus sagitta	Rodentia	Dipodidae	FALSE	0	0.920504	0.274517	0.946224	0.0813178	0.799994	0.998237	0.936595	0.958396	0.0679805	0.827923	0.998973	0.240692	0.221222	0.126564	0.0937585	0.414648
adenoviridae	Distoechurus pennatus	Diprotodontia	Acrobatidae	FALSE	0	3.67127e-39	0	0	0	0	0	3.69802e-39	0	0	0	0	0.00845517	0.00453933	0.0113434	0.000571599	0.021102
adenoviridae	Dobsonia anderseni	Chiroptera	Pteropodidae	FALSE	0	0.228229	0.415189	7.298e-08	0.384915	2.24883e-22	0.936875	0.22926	7.65061e-08	0.386162	2.34012e-22	0.939178	0.0352835	0.0336527	0.01338	0.0197767	0.0523577
adenoviridae	Dobsonia beauforti	Chiroptera	Pteropodidae	FALSE	0	0.329918	0.468859	0.000666715	0.405747	6.72947e-15	0.93445	0.330063	0.000667703	0.405864	6.75792e-15	0.934719	0.0028222	0.00199899	0.00273649	0.000385946	0.00637186
adenoviridae	Dobsonia chapmani	Chiroptera	Pteropodidae	FALSE	0	0.541017	0.498738	0.823882	0.418084	3.64503e-09	0.958543	0.541187	0.824065	0.418148	3.66917e-09	0.95869	0.00279684	0.0019863	0.0027132	0.000382699	0.00630681
adenoviridae	Dobsonia crenulata	Chiroptera	Pteropodidae	FALSE	0	0.477881	0.499447	0.654254	0.418812	1.48954e-09	0.945214	0.478199	0.655315	0.418941	1.49271e-09	0.945369	0.00458338	0.00322829	0.00447396	0.000655415	0.0103148
adenoviridae	Dobsonia emersa	Chiroptera	Pteropodidae	FALSE	0	0.0300634	0.170035	5.08972e-20	0.149578	0	7.05255e-05	0.0300992	5.09381e-20	0.149736	0	7.06037e-05	0.00280455	0.00199027	0.00272027	0.000383686	0.00632657
adenoviridae	Dobsonia exoleta	Chiroptera	Pteropodidae	FALSE	0	0.565048	0.496015	0.762143	0.407403	5.78426e-08	0.976386	0.569401	0.77176	0.408936	6.12134e-08	0.977902	0.0511087	0.050029	0.016154	0.0322333	0.0714178
adenoviridae	Dobsonia inermis	Chiroptera	Pteropodidae	FALSE	0	0.079792	0.261282	1.28434e-15	0.237857	0	0.262828	0.0798569	1.28935e-15	0.238013	0	0.263025	0.00302903	0.00215596	0.00292924	0.000421717	0.00680375
adenoviridae	Dobsonia magna	Chiroptera	Pteropodidae	FALSE	0	0.292549	0.451747	4.205e-05	0.393474	7.0341e-16	0.904137	0.295182	4.42677e-05	0.396084	7.28345e-16	0.907493	0.0498722	0.0487246	0.0158713	0.0311914	0.0699145
adenoviridae	Dobsonia minor	Chiroptera	Pteropodidae	FALSE	0	0.123587	0.331849	6.65642e-10	0.268459	3.81825e-27	0.653192	0.123731	6.67384e-10	0.268698	3.82824e-27	0.654069	0.00397227	0.00285405	0.00385282	0.000566232	0.0089221
adenoviridae	Dobsonia moluccensis	Chiroptera	Pteropodidae	FALSE	0	0.893343	0.307325	0.922238	0.164584	0.797874	0.997107	0.90935	0.935618	0.160775	0.843847	0.997657	0.202938	0.197389	0.0637253	0.125413	0.285652
adenoviridae	Dobsonia pannietensis	Chiroptera	Pteropodidae	FALSE	0	0.349533	0.477032	2.52082e-05	0.443858	3.80056e-31	0.984274	0.349609	2.52372e-05	0.443942	3.80444e-31	0.984303	0.00280858	0.00199235	0.00272396	0.000384201	0.0063369
adenoviridae	Dobsonia peronii	Chiroptera	Pteropodidae	FALSE	0	0.322571	0.464196	0.00090798	0.400634	4.30395e-13	0.9474	0.322737	0.00091208	0.400751	4.31706e-13	0.94765	0.00346148	0.00250686	0.0033454	0.000500391	0.00779838
adenoviridae	Dobsonia praedatrix	Chiroptera	Pteropodidae	FALSE	0	0.143144	0.350277	1.83772e-11	0.312394	2.11201e-31	0.80612	0.143204	1.84057e-11	0.312518	2.12379e-31	0.807087	0.00302842	0.00215546	0.00292867	0.000421581	0.00680255
adenoviridae	Dobsonia viridis	Chiroptera	Pteropodidae	FALSE	0	0.266811	0.442129	0.000114094	0.375623	1.9887e-15	0.870023	0.266974	0.000114276	0.37581	1.99426e-15	0.870812	0.0034667	0.00251015	0.00335051	0.000501234	0.00780588
adenoviridae	Dolichotis patagonum	Rodentia	Caviidae	FALSE	0	0.118998	0.323553	3.04146e-24	0.289774	0	0.739842	0.119331	3.07332e-24	0.290475	0	0.744357	0.0190872	0.0152189	0.0155551	0.00519042	0.0381792
adenoviridae	Dolichotis salinicola	Rodentia	Caviidae	FALSE	0	0.067792	0.252602	4.87313e-25	0.210835	0	0.073174	0.0680417	4.95504e-25	0.211497	0	0.0740438	0.0175039	0.0141218	0.01416	0.00476799	0.0350445
adenoviridae	Dologale dybowskii	Carnivora	Herpestidae	FALSE	0	0.557205	0.496933	0.787223	0.414751	2.8882e-11	0.994992	0.557687	0.788702	0.414951	2.96789e-11	0.99501	0.00970885	0.00587412	0.0110791	0.00104644	0.0221072
adenoviridae	Dorcatragus megalotis	Cetartiodactyla	Bovidae	FALSE	0	0.823539	0.377467	0.907039	0.236788	0.590474	0.990683	0.823937	0.907278	0.236775	0.590712	0.990701	0.0057703	0.00319255	0.00725889	0.000409121	0.0145528
adenoviridae	Dorcopsis atrata	Diprotodontia	Macropodidae	FALSE	0	1.15662e-05	0	0	6.63042e-05	0	8.36524e-18	1.15807e-05	0	6.63898e-05	0	8.37806e-18	0.00528138	0.00293497	0.00688121	0.000425428	0.012317
adenoviridae	Dorcopsis hageni	Diprotodontia	Macropodidae	FALSE	0	0.0464494	0.202632	1.58986e-28	0.187586	0	7.42571e-05	0.0464869	1.59513e-28	0.187725	0	7.47941e-05	0.00574577	0.00320853	0.00747993	0.000460181	0.0135387
adenoviridae	Dorcopsis luctuosa	Diprotodontia	Macropodidae	FALSE	0	0.0196787	0.136525	3.03005e-25	0.117853	0	1.47651e-06	0.0196825	3.03281e-25	0.117869	0	1.48111e-06	0.00592511	0.00333043	0.00771423	0.000477383	0.013969
adenoviridae	Dorcopsis muelleri	Diprotodontia	Macropodidae	FALSE	0	0.16348	0.369092	7.76712e-08	0.331435	6.6632e-25	0.829499	0.163649	7.82364e-08	0.33164	6.78751e-25	0.830456	0.0140681	0.00719442	0.0212927	0.00137761	0.0336661
adenoviridae	Dorcopsulus macleayi	Diprotodontia	Macropodidae	FALSE	0	5.65811e-10	0	0	3.63793e-09	0	1.49918e-20	5.69694e-10	0	3.66512e-09	0	1.50818e-20	0.00541234	0.00301168	0.00704874	0.000439855	0.0126073
adenoviridae	Dorcopsulus vanheurni	Diprotodontia	Macropodidae	FALSE	0	0.018255	0.140684	1.71615e-36	0.117123	0	1.64338e-14	0.0182597	1.71997e-36	0.117145	0	1.64452e-14	0.00603169	0.00340903	0.00785415	0.000484851	0.0141421
adenoviridae	Dremomys everetti	Rodentia	Sciuridae	FALSE	0	0.033954	0.183273	1.04207e-24	0.156246	0	1.70737e-06	0.0339775	1.04595e-24	0.156336	0	1.71075e-06	0.00454414	0.00354737	0.00406188	0.000782541	0.0096983
adenoviridae	Dremomys gularis	Rodentia	Sciuridae	FALSE	0	0.491881	0.499844	0.742053	0.437474	2.17319e-11	0.961309	0.492098	0.742274	0.43762	2.17879e-11	0.96168	0.00438856	0.00341215	0.00393536	0.000754274	0.00938562
adenoviridae	Dremomys lokriah	Rodentia	Sciuridae	FALSE	0	0.529212	0.499105	0.792605	0.422755	2.81282e-09	0.982697	0.529608	0.793784	0.422937	2.82903e-09	0.982765	0.00609424	0.00468281	0.00540504	0.00103507	0.0129311
adenoviridae	Dremomys pernyi	Rodentia	Sciuridae	FALSE	0	0.569731	0.494434	0.77395	0.424587	4.0119e-11	0.995926	0.572294	0.782194	0.425438	4.11155e-11	0.996051	0.037677	0.0309086	0.0245364	0.0153423	0.0694688
adenoviridae	Dremomys pyrrhomerus	Rodentia	Sciuridae	FALSE	0	0.490302	0.499831	0.714111	0.436489	1.33062e-12	0.964029	0.490569	0.716583	0.436661	1.33385e-12	0.964106	0.00526878	0.00405042	0.00467442	0.000881433	0.0111997
adenoviridae	Dremomys rufigenis	Rodentia	Sciuridae	FALSE	0	0.489078	0.499881	0.722264	0.434223	2.29301e-10	0.965582	0.491174	0.735538	0.435288	2.35207e-10	0.966146	0.0341171	0.0279031	0.0223037	0.0139516	0.0625524
adenoviridae	Dromiciops gliroides	Microbiotheria	Microbiotheriidae	FALSE	0	0.0386969	0.196896	0	0.189799	0	1.15998e-13	0.0386982	0	0.189805	0	1.16284e-13	0.0116564	0.00618727	0.0159178	0.000883053	0.027153
adenoviridae	Dryomys laniger	Rodentia	Gliridae	FALSE	0	0.845464	0.358924	0.949766	0.279418	0.731706	0.999677	0.846435	0.950101	0.279509	0.734055	0.999682	0.018015	0.014248	0.0139649	0.00569134	0.0352923
adenoviridae	Dryomys niethammeri	Rodentia	Gliridae	FALSE	0	0.183299	0.391588	6.09491e-13	0.349222	0	0.860237	0.18344	6.12177e-13	0.349447	0	0.860632	0.00721604	0.00516687	0.00717805	0.000923529	0.0157783
adenoviridae	Dryomys nitedula	Rodentia	Gliridae	FALSE	0	0.840592	0.368634	0.924572	0.26082	0.728723	0.999422	0.845599	0.929649	0.260765	0.739222	0.999472	0.0695112	0.0576696	0.0470454	0.0251705	0.133183
adenoviridae	Dyacopterus brooksi	Chiroptera	Pteropodidae	FALSE	0	0.714702	0.451795	0.928671	0.394115	4.27386e-06	0.996587	0.714991	0.928783	0.394142	4.33907e-06	0.996595	0.00517836	0.00364037	0.00508768	0.000745925	0.011775
adenoviridae	Dyacopterus spadiceus	Chiroptera	Pteropodidae	FALSE	0	0.707854	0.457379	0.934835	0.392105	1.3594e-05	0.995038	0.711034	0.937848	0.392473	1.48863e-05	0.995266	0.0542939	0.0526112	0.0169184	0.0345196	0.075603
adenoviridae	Dymecodon pilirostris	Eulipotyphla	Talpidae	FALSE	0	0.0614563	0.248806	5.87924e-33	0.195305	0	0.0275326	0.0615109	5.89796e-33	0.195456	0	0.0275497	0.00657467	0.00402836	0.00815239	0.000698606	0.0148224
adenoviridae	Echimys chrysurus	Rodentia	Echimyidae	FALSE	0	0.0991885	0.300133	2.53511e-15	0.286634	6.09924e-38	0.522891	0.0992379	2.54168e-15	0.286756	6.11672e-38	0.523485	0.0121831	0.00863345	0.0122958	0.00190488	0.0265077
adenoviridae	Echimys saturnus	Rodentia	Echimyidae	FALSE	0	0.119345	0.324024	1.01772e-11	0.295256	3.09113e-37	0.70456	0.119395	1.02041e-11	0.29534	3.11604e-37	0.704944	0.00645387	0.00468005	0.00607678	0.00101015	0.0142373
adenoviridae	Echimys vieirai	Rodentia	Echimyidae	FALSE	0	0.123678	0.327286	1.88588e-13	0.316862	9.69371e-38	0.872634	0.123704	1.93278e-13	0.316918	9.72526e-38	0.872911	0.00633247	0.00460513	0.00595299	0.000988284	0.0138892
adenoviridae	Echinops telfairi	Afrosoricida	Tenrecidae	FALSE	0	0.503741	0.499986	0.774321	0.472688	3.51163e-17	0.998512	0.503883	0.774873	0.472762	3.52635e-17	0.99855	0.00987412	0.00553459	0.0149006	0.000760967	0.0229634
adenoviridae	Echinosorex gymnura	Eulipotyphla	Erinaceidae	FALSE	0	0.515635	0.499721	0.790121	0.458216	3.65097e-08	0.994585	0.516901	0.791426	0.458935	3.77959e-08	0.994687	0.0310568	0.0194323	0.0378268	0.00443501	0.0683923
adenoviridae	Echiothrix centrosa	Rodentia	Muridae	FALSE	0	0.000113472	0.0099995	2.39304e-37	0.000965838	0	1.35468e-09	0.00011445	2.43331e-37	0.000974104	0	1.37267e-09	0.0154273	0.0142735	0.00653433	0.0082068	0.023958
adenoviridae	Echiothrix leucura	Rodentia	Muridae	FALSE	0	0.000417567	0.0173179	1.35101e-34	0.00359033	0	9.84979e-11	0.000420915	1.36206e-34	0.00361912	0	9.90801e-11	0.0148365	0.0137739	0.0062761	0.00799649	0.0230107
adenoviridae	Echymipera clara	Peramelemorphia	Peramelidae	FALSE	0	0.000313578	0.0141407	0	0.00268607	0	2.91174e-31	0.00031391	0	0.00268887	0	2.9397e-31	0.00810844	0.00456557	0.0107376	0.000677351	0.0196186
adenoviridae	Echymipera davidi	Peramelemorphia	Peramelidae	FALSE	0	0.022795	0.14	0	0.137065	0	8.60382e-13	0.0228004	0	0.137097	0	8.66492e-13	0.00736472	0.00412697	0.00981119	0.000639895	0.0177313
adenoviridae	Echymipera echinista	Peramelemorphia	Peramelidae	FALSE	0	3.02379e-08	0	0	2.60116e-07	0	1.60989e-25	3.02685e-08	0	2.6038e-07	0	1.60995e-25	0.00736689	0.00412796	0.00981386	0.000640323	0.0177355
adenoviridae	Echymipera kalubu	Peramelemorphia	Peramelidae	FALSE	0	8.57621e-27	0	0	0	0	0	8.58742e-27	0	0	0	0	0.0113089	0.00625822	0.0148489	0.000901919	0.0268336
adenoviridae	Echymipera rufescens	Peramelemorphia	Peramelidae	FALSE	0	6.30684e-27	0	0	0	0	0	6.34331e-27	0	0	0	0	0.0113576	0.00628725	0.0149121	0.000907863	0.0269685
adenoviridae	Ectophylla alba	Chiroptera	Phyllostomidae	FALSE	0	0.183142	0.384104	4.05621e-09	0.322614	9.22462e-25	0.766564	0.183232	4.05902e-09	0.322752	9.23674e-25	0.767157	0.00277647	0.00206225	0.00249274	0.000449476	0.00601878
adenoviridae	Eidolon dupreanum	Chiroptera	Pteropodidae	FALSE	0	0.939687	0.235999	0.983629	0.125787	0.842833	0.999221	0.957513	0.990164	0.116563	0.905879	0.999673	0.394142	0.394011	0.0849817	0.289055	0.503211
adenoviridae	Eidolon helvum	Chiroptera	Pteropodidae	TRUE	1	1	0	1	0	1	1	0.996921	0.999953	0.0100791	0.993045	1	0.862876	0.883867	0.101107	0.724582	0.975181
adenoviridae	Eira barbara	Carnivora	Mustelidae	FALSE	0	0.841501	0.367623	0.961239	0.296215	0.312447	0.998442	0.856618	0.971305	0.296882	0.356481	0.998997	0.285992	0.271251	0.114403	0.147276	0.442428
adenoviridae	Elaphodus cephalophus	Cetartiodactyla	Cervidae	FALSE	0	0.945709	0.229148	0.983734	0.0778051	0.821965	0.999989	0.954272	0.98558	0.0617332	0.847541	0.999991	0.122003	0.0970615	0.0934434	0.0350318	0.239302
adenoviridae	Elephantulus brachyrhynchus	Macroscelidea	Macroscelididae	FALSE	0	0.0561386	0.239147	0	0.196549	0	0.0071227	0.0563556	0	0.197169	0	0.0072166	0.0176648	0.00970389	0.0248936	0.00133884	0.0414828
adenoviridae	Elephantulus edwardii	Macroscelidea	Macroscelididae	FALSE	0	0.0133722	0.11749	0	0.114536	0	4.8201e-14	0.013373	0	0.114539	0	4.87204e-14	0.0104256	0.00556381	0.0152672	0.000826862	0.0250279
adenoviridae	Elephantulus fuscipes	Macroscelidea	Macroscelididae	FALSE	0	0.0503656	0.219589	0	0.212901	0	3.12098e-06	0.0503755	0	0.212941	0	3.12356e-06	0.00880491	0.00465616	0.0131096	0.000684099	0.0210916
adenoviridae	Elephantulus fuscus	Macroscelidea	Macroscelididae	FALSE	0	0.034098	0.18251	0	0.168349	0	7.27721e-18	0.0341354	0	0.168534	0	7.42715e-18	0.00879697	0.00465293	0.0130991	0.000683881	0.0210818
adenoviridae	Elephantulus intufi	Macroscelidea	Macroscelididae	FALSE	0	0.017196	0.134751	0	0.106811	0	8.48829e-14	0.0172664	0	0.107186	0	8.5026e-14	0.01293	0.0070356	0.0186234	0.00100133	0.0312146
adenoviridae	Elephantulus myurus	Macroscelidea	Macroscelididae	FALSE	0	0.0135843	0.100479	0	0.114513	0	8.66242e-11	0.013589	0	0.114517	0	9.49226e-11	0.0143623	0.00789672	0.0205358	0.00109639	0.0343581
adenoviridae	Elephantulus pilicaudus	Macroscelidea	Macroscelididae	FALSE	0	3.12071e-09	0	0	2.4703e-08	0	3.09307e-29	3.13048e-09	0	2.47495e-08	0	3.15032e-29	0.00801894	0.00428335	0.0120777	0.000613267	0.0187346
adenoviridae	Elephantulus revoilii	Macroscelidea	Macroscelididae	FALSE	0	2.03652e-06	0	0	1.75188e-05	0	4.06976e-29	2.07638e-06	0	1.78617e-05	0	4.07195e-29	0.00872984	0.00462564	0.0130104	0.000682044	0.020939
adenoviridae	Elephantulus rozeti	Macroscelidea	Macroscelididae	FALSE	0	0.0123833	0.107532	0	0.105389	0	8.65515e-10	0.0123875	0	0.10542	0	8.67891e-10	0.0131592	0.00715646	0.0189302	0.0010173	0.0318348
adenoviridae	Elephantulus rufescens	Macroscelidea	Macroscelididae	FALSE	0	0.221345	0.416988	3.0038e-16	0.383456	0	0.919569	0.221765	3.08457e-16	0.383936	0	0.920053	0.0167026	0.00919816	0.0236326	0.0012713	0.0393686
adenoviridae	Elephantulus rupestris	Macroscelidea	Macroscelididae	FALSE	0	2.03805e-07	0	0	1.74913e-06	0	2.46729e-28	2.04256e-07	0	1.75292e-06	0	2.53425e-28	0.0112675	0.00607026	0.0163952	0.000884958	0.0266273
adenoviridae	Elephas maximus	Proboscidea	Elephantidae	FALSE	0	0.932471	0.253284	0.995258	0.143022	0.792588	0.999999	0.944659	0.995356	0.129581	0.842364	0.999999	0.192005	0.0871107	0.222599	0.00771552	0.540618
adenoviridae	Eligmodontia moreni	Rodentia	Cricetidae	FALSE	0	0.0112027	0.0954744	8.14712e-25	0.0832317	0	7.10037e-09	0.0112201	8.16895e-25	0.0833426	0	7.11669e-09	0.00368878	0.00262782	0.00360393	0.000540771	0.00814555
adenoviridae	Eligmodontia morgani	Rodentia	Cricetidae	FALSE	0	0.0593857	0.240974	1.45941e-13	0.197633	2.20584e-35	0.0284675	0.0594888	1.47492e-13	0.19794	2.21656e-35	0.0285462	0.00426033	0.00297679	0.00411857	0.000615979	0.00926032
adenoviridae	Eligmodontia puerulus	Rodentia	Cricetidae	FALSE	0	0.0364396	0.188024	1.04918e-19	0.162621	1.73725e-39	8.52237e-07	0.0364662	1.05242e-19	0.162691	1.7596e-39	8.53261e-07	0.00451579	0.00313842	0.00435772	0.000654889	0.0097757
adenoviridae	Eligmodontia typus	Rodentia	Cricetidae	FALSE	0	0.0650236	0.250886	4.06888e-11	0.210138	2.3829e-24	0.0309842	0.0651457	4.07457e-11	0.210465	2.40189e-24	0.0309909	0.00499704	0.00348357	0.00481938	0.000713184	0.0107585
adenoviridae	Eliomys melanurus	Rodentia	Gliridae	FALSE	0	0.792173	0.408513	0.900001	0.28274	0.365794	0.995211	0.793941	0.905271	0.282462	0.367783	0.995311	0.0187219	0.0148043	0.0143399	0.00601199	0.0369773
adenoviridae	Eliomys munbyanus	Rodentia	Gliridae	FALSE	0	0.694072	0.462205	0.855992	0.352952	0.000198281	0.995668	0.696965	0.858886	0.352895	0.000209964	0.995763	0.0301167	0.0244611	0.0212046	0.010495	0.0571034
adenoviridae	Eliomys quercinus	Rodentia	Gliridae	FALSE	0	0.95773	0.206203	0.966754	0.0459317	0.906482	0.999023	0.96078	0.970204	0.0424907	0.912107	0.99909	0.0711928	0.0590567	0.0480361	0.0256889	0.135574
adenoviridae	Eliurus antsingy	Rodentia	Nesomyidae	FALSE	0	0.0497031	0.216077	1.8332e-11	0.178626	1.39299e-27	0.00115937	0.0498066	1.84493e-11	0.178904	1.40034e-27	0.00116936	0.00730177	0.00566357	0.00657265	0.00137166	0.0154246
adenoviridae	Eliurus danieli	Rodentia	Nesomyidae	FALSE	0	0.0269293	0.154903	7.10043e-13	0.132998	1.707e-37	0.000768767	0.0269621	7.13887e-13	0.133125	1.73348e-37	0.000781402	0.00730566	0.00566485	0.00657577	0.00137258	0.0154306
adenoviridae	Eliurus ellermani	Rodentia	Nesomyidae	FALSE	0	0.106481	0.310128	4.22953e-11	0.275442	1.17303e-29	0.665323	0.106596	4.24055e-11	0.275707	1.17858e-29	0.666131	0.00716329	0.00553258	0.00646195	0.00133897	0.015116
adenoviridae	Eliurus grandidieri	Rodentia	Nesomyidae	FALSE	0	0.163896	0.37431	1.3186e-07	0.336887	7.12755e-21	0.825223	0.164111	1.32071e-07	0.337271	7.15933e-21	0.825976	0.01143	0.00846783	0.0101339	0.00210703	0.0248498
adenoviridae	Eliurus majori	Rodentia	Nesomyidae	FALSE	0	0.152692	0.363612	1.89291e-10	0.334988	4.86895e-28	0.888287	0.153072	1.93118e-10	0.335644	4.95018e-28	0.889278	0.0297732	0.0249744	0.0190344	0.0119988	0.054469
adenoviridae	Eliurus minor	Rodentia	Nesomyidae	FALSE	0	0.159264	0.369912	1.2288e-07	0.329285	6.27223e-25	0.795311	0.159863	1.25303e-07	0.330295	6.40823e-25	0.797139	0.0313401	0.026208	0.0199754	0.0127362	0.0572644
adenoviridae	Eliurus myoxinus	Rodentia	Nesomyidae	FALSE	0	0.0248877	0.147657	2.16364e-14	0.118902	2.69637e-33	0.000383412	0.0249648	2.16594e-14	0.119222	2.71533e-33	0.000389505	0.0119174	0.00884946	0.0105728	0.00220293	0.0260982
adenoviridae	Eliurus penicillatus	Rodentia	Nesomyidae	FALSE	0	0.444053	0.49788	0.581898	0.404795	1.22708e-08	0.9045	0.444617	0.582446	0.405195	1.23944e-08	0.904927	0.00751598	0.00582757	0.00674563	0.00142605	0.015929
adenoviridae	Eliurus petteri	Rodentia	Nesomyidae	FALSE	0	0.216417	0.414111	1.5412e-05	0.361358	3.27663e-15	0.848354	0.216652	1.54658e-05	0.361708	3.29724e-15	0.849402	0.00731787	0.00566887	0.00658558	0.00137546	0.0154493
adenoviridae	Eliurus tanala	Rodentia	Nesomyidae	FALSE	0	0.171315	0.376771	8.2169e-09	0.347181	1.77068e-23	0.876351	0.171781	8.42131e-09	0.34796	1.89735e-23	0.879996	0.0317252	0.0265638	0.0202081	0.0129057	0.058017
adenoviridae	Eliurus webbi	Rodentia	Nesomyidae	FALSE	0	0.165578	0.370457	1.09783e-07	0.33846	2.96329e-25	0.798077	0.165803	1.15402e-07	0.338854	2.98745e-25	0.798809	0.0126521	0.00939562	0.0112379	0.00234511	0.0278251
adenoviridae	Ellobius alaicus	Rodentia	Cricetidae	FALSE	0	0.418291	0.492705	0.564859	0.379763	3.34206e-14	0.865982	0.418668	0.567288	0.380012	3.36965e-14	0.866781	0.00360768	0.00257008	0.00353376	0.000526332	0.00797401
adenoviridae	Ellobius fuscocapillus	Rodentia	Cricetidae	FALSE	0	0.224335	0.419996	4.74475e-05	0.323573	9.154e-21	0.759135	0.224586	4.7532e-05	0.323894	9.25283e-21	0.759828	0.0042513	0.00297358	0.00411021	0.000614822	0.00924231
adenoviridae	Ellobius lutescens	Rodentia	Cricetidae	FALSE	0	0.259385	0.438196	0.00089683	0.339606	3.45327e-21	0.78542	0.25967	0.000902582	0.339929	3.45359e-21	0.786098	0.00417902	0.00294387	0.0040435	0.000605574	0.00910239
adenoviridae	Ellobius talpinus	Rodentia	Cricetidae	FALSE	0	0.325065	0.467812	0.00179059	0.389	2.38365e-27	0.898841	0.325354	0.00180603	0.389268	2.39085e-27	0.899442	0.00561618	0.00387377	0.00542911	0.000805858	0.0121886
adenoviridae	Ellobius tancrei	Rodentia	Cricetidae	FALSE	0	0.259233	0.44037	0.0019315	0.346279	3.2651e-29	0.763623	0.259618	0.0019351	0.3466	3.2831e-29	0.76484	0.00672452	0.00467154	0.00654838	0.000941849	0.0145736
adenoviridae	Emballonura alecto	Chiroptera	Emballonuridae	FALSE	0	0.26984	0.442813	4.12042e-06	0.38927	2.69595e-21	0.926204	0.270325	4.20179e-06	0.389775	2.69985e-21	0.926945	0.00818042	0.00574216	0.00858213	0.00101436	0.0183618
adenoviridae	Emballonura beccarii	Chiroptera	Emballonuridae	FALSE	0	6.90568e-09	0	0	5.94037e-08	0	2.57687e-26	6.91938e-09	0	5.95215e-08	0	2.57828e-26	0.00358135	0.00236286	0.00377738	0.00047942	0.00792991
adenoviridae	Emballonura dianae	Chiroptera	Emballonuridae	FALSE	0	1.35306e-09	0	0	1.14302e-08	0	1.43327e-22	1.37506e-09	0	1.16186e-08	0	1.44077e-22	0.00371476	0.00247725	0.00390564	0.000495128	0.00823242
adenoviridae	Emballonura furax	Chiroptera	Emballonuridae	FALSE	0	4.81208e-07	0	0	3.36919e-06	0	1.00505e-14	4.83264e-07	0	3.37758e-06	0	1.00979e-14	0.00354005	0.00234451	0.00373801	0.000474376	0.0078245
adenoviridae	Emballonura monticola	Chiroptera	Emballonuridae	FALSE	0	0.349841	0.476938	0.00250059	0.417725	1.71907e-24	0.962721	0.350381	0.00251269	0.418096	1.72286e-24	0.96338	0.00912567	0.00637086	0.00959922	0.00113741	0.020678
adenoviridae	Emballonura raffrayana	Chiroptera	Emballonuridae	FALSE	0	1.28391e-06	0	0	1.1043e-05	0	1.83001e-19	1.28672e-06	0	1.10672e-05	0	1.84399e-19	0.00425247	0.00292749	0.00443648	0.000561747	0.00952547
adenoviridae	Emballonura semicaudata	Chiroptera	Emballonuridae	FALSE	0	0.160055	0.365022	2.40092e-10	0.341598	0	0.892464	0.160143	2.40854e-10	0.341714	0	0.893402	0.00336645	0.00221711	0.00357443	0.000452182	0.00739957
adenoviridae	Emballonura serii	Chiroptera	Emballonuridae	FALSE	0	2.59191e-12	0	0	2.19855e-11	0	1.59677e-22	2.59708e-12	0	2.20279e-11	0	1.62068e-22	0.00341137	0.00224355	0.00361644	0.000460753	0.00746906
adenoviridae	Enchisthenes hartii	Chiroptera	Phyllostomidae	FALSE	0	0.494863	0.5	0.747581	0.386747	4.57007e-09	0.879143	0.495206	0.748117	0.386941	4.60717e-09	0.879608	0.00482652	0.00364651	0.00423971	0.000785699	0.0105408
adenoviridae	Eoglaucomys fimbriatus	Rodentia	Sciuridae	FALSE	0	0.147771	0.353006	7.0124e-15	0.337343	0	0.929909	0.14782	7.0624e-15	0.337408	0	0.930109	0.00475917	0.00366798	0.00423997	0.000821874	0.0101454
adenoviridae	Eolagurus luteus	Rodentia	Cricetidae	FALSE	0	0.717665	0.450022	0.801891	0.27285	0.256644	0.96309	0.718444	0.802542	0.272878	0.257187	0.963621	0.00616478	0.00429131	0.0059797	0.000869876	0.0134337
adenoviridae	Eolagurus przewalskii	Rodentia	Cricetidae	FALSE	0	0.572357	0.496423	0.70296	0.294441	0.000484158	0.830557	0.573163	0.703168	0.294714	0.000486721	0.830778	0.00492652	0.00343349	0.00475095	0.000703876	0.0105633
adenoviridae	Eonycteris major	Chiroptera	Pteropodidae	FALSE	0	0.500145	0.5	0.696102	0.422779	4.25877e-09	0.959826	0.500679	0.697213	0.422973	4.29131e-09	0.960169	0.00659204	0.00456786	0.00656355	0.000964788	0.0151331
adenoviridae	Eonycteris robusta	Chiroptera	Pteropodidae	FALSE	0	0.325711	0.468896	0.000505852	0.393377	1.2692e-15	0.882253	0.325899	0.000506941	0.393571	1.27302e-15	0.882576	0.00336672	0.00243214	0.00325296	0.000483076	0.00751939
adenoviridae	Eonycteris spelaea	Chiroptera	Pteropodidae	TRUE	1	1	0	1	0	1	1	0.988855	0.998246	0.0211434	0.956539	0.999991	0.855079	0.8756	0.102072	0.716093	0.96962
adenoviridae	Eospalax fontanierii	Rodentia	Spalacidae	FALSE	0	0.340922	0.472754	0.00171768	0.378897	4.10731e-34	0.828993	0.341917	0.00176261	0.379825	4.11322e-34	0.829458	0.0133158	0.0101503	0.0128329	0.00190796	0.0283472
adenoviridae	Eospalax rothschildi	Rodentia	Spalacidae	FALSE	0	0.494978	0.499964	0.62436	0.4248	3.09974e-14	0.970774	0.495654	0.624714	0.425165	3.12442e-14	0.971023	0.0122851	0.0093166	0.0117711	0.00176444	0.0262951
adenoviridae	Eospalax smithii	Rodentia	Spalacidae	FALSE	0	0.384066	0.486429	0.141267	0.392986	9.82e-20	0.856777	0.384785	0.142449	0.393579	9.88061e-20	0.857866	0.00990214	0.0074821	0.00934872	0.0014855	0.021416
adenoviridae	Eothenomys cachinus	Rodentia	Cricetidae	FALSE	0	0.872345	0.338817	0.913579	0.162562	0.778004	0.980314	0.874979	0.915366	0.162333	0.781204	0.981978	0.0301518	0.0230877	0.0248416	0.00983539	0.0574501
adenoviridae	Eothenomys chinensis	Rodentia	Cricetidae	FALSE	0	0.775012	0.413433	0.772915	0.082757	0.667856	0.889321	0.777767	0.774456	0.0820061	0.670676	0.891203	0.015158	0.0119183	0.012183	0.00511112	0.027801
adenoviridae	Eothenomys custos	Rodentia	Cricetidae	TRUE	1	1	0	1	0	1	1	0.851757	0.837848	0.0911629	0.740705	0.971014	0.0167501	0.0131171	0.0131176	0.00572859	0.0310868
adenoviridae	Eothenomys melanogaster	Rodentia	Cricetidae	FALSE	0	0.88948	0.316348	0.912138	0.103338	0.761774	0.997672	0.929679	0.946969	0.0649075	0.847395	0.998019	0.381664	0.368317	0.160122	0.182991	0.606159
adenoviridae	Eothenomys miletus	Rodentia	Cricetidae	FALSE	0	0.899827	0.298528	0.933055	0.105573	0.79352	0.984351	0.906302	0.936307	0.102469	0.810612	0.985492	0.0741146	0.058738	0.0532932	0.0264858	0.142994
adenoviridae	Eothenomys olitor	Rodentia	Cricetidae	FALSE	0	0.867438	0.337072	0.885612	0.0782615	0.752873	0.954717	0.868055	0.885708	0.0779259	0.753699	0.955129	0.00495551	0.00345538	0.00477905	0.000707696	0.0106741
adenoviridae	Eothenomys proditor	Rodentia	Cricetidae	FALSE	0	0.804157	0.397351	0.814855	0.0845972	0.679009	0.919116	0.804813	0.815236	0.084353	0.680678	0.91944	0.00392512	0.002787	0.0038128	0.000572686	0.00857306
adenoviridae	Eothenomys wardi	Rodentia	Cricetidae	FALSE	0	0.820493	0.381075	0.817694	0.0945001	0.697872	0.941557	0.82104	0.818227	0.0942777	0.698137	0.941914	0.00370398	0.00264149	0.00361717	0.000542769	0.00815227
adenoviridae	Eozapus setchuanus	Rodentia	Dipodidae	FALSE	0	0.691991	0.458039	0.81189	0.323485	0.00211019	0.991836	0.695148	0.815863	0.323735	0.00217696	0.99199	0.0308616	0.0262284	0.0213933	0.0108398	0.0582754
adenoviridae	Episoriculus caudatus	Eulipotyphla	Soricidae	FALSE	0	0.776426	0.415524	0.771701	0.071714	0.714796	0.872015	0.778241	0.773337	0.0716107	0.717331	0.873161	0.0102339	0.00685671	0.0116614	0.00222008	0.0209948
adenoviridae	Episoriculus fumidus	Eulipotyphla	Soricidae	FALSE	0	0.180534	0.378679	3.0913e-07	0.317378	1.82329e-25	0.772421	0.180828	3.1021e-07	0.317754	1.83853e-25	0.773352	0.00528841	0.00393346	0.00529913	0.00115635	0.0107572
adenoviridae	Episoriculus leucops	Eulipotyphla	Soricidae	FALSE	0	0.76406	0.426961	0.753424	0.089226	0.696033	0.876522	0.765664	0.755584	0.0891456	0.697264	0.877863	0.00886681	0.00593072	0.010131	0.00195243	0.0181264
adenoviridae	Episoriculus macrurus	Eulipotyphla	Soricidae	FALSE	0	0.779519	0.412134	0.770644	0.0582907	0.716392	0.8673	0.780843	0.772455	0.0582157	0.717882	0.868918	0.00779025	0.00577725	0.00770396	0.00172855	0.0158973
adenoviridae	Epixerus ebii	Rodentia	Sciuridae	FALSE	0	0.464292	0.497671	0.670694	0.457553	4.90769e-30	0.991667	0.464586	0.672292	0.457758	4.93551e-30	0.991824	0.00741815	0.00564252	0.00661818	0.00124661	0.0158785
adenoviridae	Epomophorus angolensis	Chiroptera	Pteropodidae	FALSE	0	0.557126	0.496265	0.763083	0.383185	7.34201e-07	0.937803	0.557451	0.76343	0.383297	7.35706e-07	0.938085	0.00315772	0.00225265	0.00305144	0.000449095	0.00701998
adenoviridae	Epomophorus anselli	Chiroptera	Pteropodidae	FALSE	0	0.883739	0.326707	0.920897	0.170343	0.778842	0.993318	0.883952	0.921052	0.170292	0.779406	0.993351	0.00280401	0.00199	0.00271978	0.000383617	0.0063252
adenoviridae	Epomophorus crypturus	Chiroptera	Pteropodidae	FALSE	0	0.971677	0.164973	0.995689	0.116448	0.9531	0.999987	0.971761	0.995706	0.116428	0.953315	0.999987	0.00588058	0.00410638	0.00581872	0.000865609	0.0134093
adenoviridae	Epomophorus gambianus	Chiroptera	Pteropodidae	TRUE	1	1	0	1	0	1	1	0.995762	0.999613	0.0112277	0.987621	1	0.338363	0.335977	0.0740265	0.247432	0.431077
adenoviridae	Epomophorus grandis	Chiroptera	Pteropodidae	FALSE	0	0.434865	0.494509	0.424801	0.403371	3.68666e-14	0.9545	0.435054	0.424945	0.403478	3.69126e-14	0.954787	0.0027975	0.00198664	0.0027138	0.000382783	0.00630849
adenoviridae	Epomophorus labiatus	Chiroptera	Pteropodidae	FALSE	0	0.919254	0.275125	0.93929	0.0698217	0.833324	0.992165	0.936438	0.950378	0.0559018	0.872643	0.993647	0.220943	0.21786	0.0551575	0.151343	0.290557
adenoviridae	Epomophorus minimus	Chiroptera	Pteropodidae	FALSE	0	0.884115	0.324376	0.915013	0.158294	0.820939	0.98765	0.884447	0.916054	0.158268	0.821195	0.987717	0.00413847	0.00294974	0.00402053	0.000592328	0.00932227
adenoviridae	Epomophorus minor	Chiroptera	Pteropodidae	FALSE	0	0.920103	0.266433	0.931351	0.0681408	0.832472	0.993642	0.920603	0.932509	0.0677712	0.834162	0.993712	0.00650397	0.00451529	0.00647121	0.000951549	0.0149916
adenoviridae	Epomophorus wahlbergi	Chiroptera	Pteropodidae	FALSE	0	0.960869	0.194545	0.986897	0.0585775	0.859824	0.999986	0.97163	0.991029	0.0418648	0.901334	0.99999	0.265383	0.262187	0.0625824	0.188105	0.34744
adenoviridae	Epomops buettikoferi	Chiroptera	Pteropodidae	FALSE	0	0.895323	0.307068	0.95748	0.206689	0.821421	0.999639	0.90303	0.962554	0.20398	0.83972	0.99968	0.139435	0.136936	0.0383696	0.0922201	0.18892
adenoviridae	Epomops dobsonii	Chiroptera	Pteropodidae	FALSE	0	0.717889	0.448261	0.839516	0.318819	0.019786	0.968875	0.723356	0.847906	0.318945	0.0209355	0.96996	0.0492539	0.0480211	0.0157332	0.0306645	0.0689274
adenoviridae	Epomops franqueti	Chiroptera	Pteropodidae	TRUE	1	1	0	1	0	1	1	0.991566	0.999766	0.0195458	0.977643	1	0.716835	0.726401	0.0992205	0.583481	0.836187
adenoviridae	Eptesicus anatolicus	Chiroptera	Vespertilionidae	FALSE	0	0.437056	0.496459	0.366161	0.422688	2.76097e-09	0.940381	0.437566	0.36871	0.422963	2.77999e-09	0.940733	0.0078079	0.00691199	0.00479603	0.00284048	0.014099
adenoviridae	Eptesicus andinus	Chiroptera	Vespertilionidae	FALSE	0	0.344562	0.480291	0.000703826	0.416551	2.00956e-13	0.954969	0.344919	0.000708961	0.416842	2.03513e-13	0.955695	0.00809761	0.0071922	0.00495845	0.00293693	0.0145524
adenoviridae	Eptesicus bobrinskoi	Chiroptera	Vespertilionidae	FALSE	0	0.290279	0.45658	3.26388e-05	0.377527	4.79169e-27	0.817446	0.290744	3.2775e-05	0.377988	4.82107e-27	0.818754	0.00666878	0.00585831	0.00418608	0.002371	0.0121981
adenoviridae	Eptesicus bottae	Chiroptera	Vespertilionidae	FALSE	0	0.277355	0.445806	1.61323e-06	0.362135	2.77504e-24	0.844349	0.277919	1.63494e-06	0.362705	2.79343e-24	0.845015	0.00857002	0.00763189	0.00522826	0.00308168	0.0152013
adenoviridae	Eptesicus brasiliensis	Chiroptera	Vespertilionidae	FALSE	1	1	0	1	0	1	1	0.962351	0.982039	0.0413946	0.893028	0.999794	0.102566	0.100015	0.0245626	0.0739246	0.134005
adenoviridae	Eptesicus chiriquinus	Chiroptera	Vespertilionidae	FALSE	0	0.474656	0.499254	0.67223	0.427148	5.18035e-06	0.981626	0.475039	0.672638	0.427327	5.22003e-06	0.9818	0.00683239	0.00600088	0.00427039	0.00244389	0.0124437
adenoviridae	Eptesicus diminutus	Chiroptera	Vespertilionidae	FALSE	1	1	0	1	0	1	1	0.970696	0.990506	0.0459622	0.90103	0.999887	0.178103	0.173063	0.0370623	0.133457	0.226602
adenoviridae	Eptesicus dimissus	Chiroptera	Vespertilionidae	FALSE	0	0.522552	0.498903	0.726651	0.398548	4.14929e-08	0.935694	0.523057	0.727478	0.398796	4.18201e-08	0.93624	0.00575714	0.0049713	0.00374264	0.00198715	0.0108928
adenoviridae	Eptesicus floweri	Chiroptera	Vespertilionidae	FALSE	0	0.306382	0.461375	0.00329869	0.371633	6.44877e-18	0.844554	0.306859	0.00331581	0.372079	6.48817e-18	0.846004	0.00653228	0.00573037	0.00411673	0.00231131	0.0119697
adenoviridae	Eptesicus furinalis	Chiroptera	Vespertilionidae	FALSE	0	0.813614	0.380905	0.937087	0.305543	0.102504	0.999868	0.8274	0.950209	0.304289	0.13505	0.999898	0.208269	0.20362	0.0427019	0.156569	0.262875
adenoviridae	Eptesicus fuscus	Chiroptera	Vespertilionidae	FALSE	0	0.852191	0.360373	0.91098	0.184508	0.572965	0.997771	0.959124	0.98836	0.0910029	0.894552	0.999687	0.83029	0.835001	0.0562445	0.752619	0.898837
adenoviridae	Eptesicus gobiensis	Chiroptera	Vespertilionidae	FALSE	0	0.357063	0.477376	0.0135004	0.401451	1.77696e-21	0.906092	0.358044	0.0139731	0.402227	1.79659e-21	0.906573	0.0137794	0.0122693	0.00842355	0.00480318	0.0239398
adenoviridae	Eptesicus guadeloupensis	Chiroptera	Vespertilionidae	FALSE	0	0.333386	0.470573	0.00275555	0.388782	4.41233e-20	0.87453	0.333785	0.00277101	0.389154	4.46615e-20	0.875575	0.0058367	0.005071	0.00377931	0.00203453	0.0110147
adenoviridae	Eptesicus hottentotus	Chiroptera	Vespertilionidae	FALSE	0	0.377053	0.483471	0.179009	0.402194	1.41508e-12	0.920337	0.383727	0.192327	0.406397	1.55461e-12	0.926847	0.0867009	0.0846988	0.0206451	0.062974	0.113904
adenoviridae	Eptesicus innoxius	Chiroptera	Vespertilionidae	FALSE	0	0.176759	0.384354	8.31818e-06	0.319846	1.11347e-16	0.832167	0.177019	8.33388e-06	0.320216	1.11954e-16	0.832878	0.00610578	0.00532388	0.00390643	0.00215695	0.0114526
adenoviridae	Eptesicus isabellinus	Chiroptera	Vespertilionidae	FALSE	0	0.8493	0.359021	0.866795	0.132384	0.724645	0.970968	0.894468	0.909964	0.119931	0.816318	0.97948	0.368545	0.365398	0.0582732	0.296602	0.441893
adenoviridae	Eptesicus japonensis	Chiroptera	Vespertilionidae	FALSE	0	0.885496	0.319384	0.90644	0.0786203	0.798483	0.982081	0.894184	0.912037	0.0732697	0.81601	0.983913	0.0892282	0.0857427	0.02824	0.0562738	0.125999
adenoviridae	Eptesicus lobatus	Chiroptera	Vespertilionidae	FALSE	0	0.884151	0.326243	0.926795	0.170073	0.787515	0.992061	0.88457	0.92722	0.16997	0.788259	0.992147	0.00578435	0.00500704	0.00375513	0.00200516	0.0109552
adenoviridae	Eptesicus nilssonii	Chiroptera	Vespertilionidae	TRUE	1	1	0	1	0	1	1	0.98363	0.994607	0.0260675	0.958782	0.999909	0.526054	0.524573	0.0667251	0.440622	0.609289
adenoviridae	Eptesicus ognevi	Chiroptera	Vespertilionidae	FALSE	0	0.368781	0.483444	9.54565e-05	0.407866	2.65737e-19	0.904028	0.369343	9.62975e-05	0.408391	2.67714e-19	0.904687	0.0084152	0.007498	0.0051392	0.00301803	0.0150017
adenoviridae	Eptesicus pachyomus	Chiroptera	Vespertilionidae	FALSE	0	0.809698	0.394107	0.834996	0.160841	0.706887	0.949888	0.822187	0.847622	0.159413	0.728834	0.954946	0.0934192	0.0912549	0.0222708	0.0677985	0.121664
adenoviridae	Eptesicus pachyotis	Chiroptera	Vespertilionidae	FALSE	0	0.743623	0.436086	0.83019	0.261481	0.405656	0.957003	0.745123	0.832094	0.261449	0.407667	0.957393	0.0117956	0.0105025	0.00717634	0.00415533	0.0206573
adenoviridae	Eptesicus platyops	Chiroptera	Vespertilionidae	FALSE	0	0.594784	0.49176	0.773069	0.402103	4.44204e-12	0.981818	0.595294	0.773893	0.402255	4.46675e-12	0.981929	0.00572613	0.00494004	0.00372846	0.00196662	0.0108587
adenoviridae	Eptesicus serotinus	Chiroptera	Vespertilionidae	TRUE	1	1	0	1	0	1	1	0.984361	0.996289	0.0254487	0.954317	0.999974	0.919894	0.928544	0.0518505	0.851472	0.975468
adenoviridae	Eptesicus tatei	Chiroptera	Vespertilionidae	FALSE	0	0.730719	0.446565	0.811956	0.26116	0.27179	0.943035	0.731471	0.812394	0.261166	0.272777	0.94328	0.0057472	0.00496316	0.00373809	0.00198057	0.0108813
adenoviridae	Equus africanus	Perissodactyla	Equidae	FALSE	0	0.854345	0.351292	0.957594	0.248099	0.697992	0.999963	0.854779	0.957686	0.248042	0.698688	0.999963	0.00928304	0.00476561	0.01329	0.000592207	0.0220643
adenoviridae	Equus ferus	Perissodactyla	Equidae	FALSE	0	0.96289	0.193357	0.996739	0.0804174	0.874453	0.999996	0.97918	0.999027	0.0401267	0.911896	0.999997	0.34209	0.275971	0.265828	0.040415	0.752346
adenoviridae	Equus grevyi	Perissodactyla	Equidae	FALSE	0	0.839406	0.365956	0.962181	0.30137	0.22218	0.999999	0.840067	0.962481	0.30137	0.222274	0.999999	0.0182985	0.00902365	0.0258272	0.00134791	0.0480704
adenoviridae	Equus hemionus	Perissodactyla	Equidae	FALSE	0	0.904995	0.3	0.983566	0.220482	0.814776	0.999993	0.906088	0.983639	0.220175	0.820104	0.999993	0.0329368	0.0124592	0.057165	0.00171238	0.0888503
adenoviridae	Equus kiang	Perissodactyla	Equidae	FALSE	0	0.810944	0.394809	0.975847	0.342196	0.000216495	0.999982	0.811862	0.976103	0.342362	0.000218743	0.999982	0.0301457	0.0150831	0.0421589	0.00220219	0.0800882
adenoviridae	Equus quagga	Perissodactyla	Equidae	FALSE	0	0.880234	0.322015	0.977563	0.250593	0.764721	0.999689	0.880891	0.977757	0.250613	0.765362	0.999695	0.0182831	0.00963449	0.0250877	0.0011685	0.0439872
adenoviridae	Equus zebra	Perissodactyla	Equidae	FALSE	0	0.91797	0.266433	0.993113	0.206548	0.827241	0.999977	0.918895	0.99316	0.205911	0.833209	0.999977	0.0482472	0.015765	0.0837866	0.00200661	0.140046
adenoviridae	Eremitalpa granti	Afrosoricida	Chrysochloridae	FALSE	0	1.03401e-13	0	0	8.89487e-13	0	0	1.03682e-13	0	8.91909e-13	0	0	0.00730248	0.00417328	0.00992049	0.000559974	0.0180748
adenoviridae	Eremodipus lichtensteini	Rodentia	Dipodidae	FALSE	0	0.0325535	0.174933	4.07546e-26	0.159984	0	1.52201e-05	0.032595	4.08806e-26	0.160165	0	1.52646e-05	0.007937	0.00556189	0.00816658	0.00113285	0.0176741
adenoviridae	Eremoryzomys polius	Rodentia	Cricetidae	FALSE	0	0.00744686	0.0862772	2.87666e-29	0.0640603	0	5.60377e-13	0.0074488	2.90024e-29	0.064077	0	5.6199e-13	0.0036409	0.00259172	0.0035624	0.000532247	0.00801831
adenoviridae	Erethizon dorsatum	Rodentia	Erethizontidae	TRUE	1	1	0	1	0	1	1	0.973438	0.989657	0.0441435	0.926411	0.999953	0.267343	0.246753	0.127067	0.120018	0.448991
adenoviridae	Erinaceus amurensis	Eulipotyphla	Erinaceidae	FALSE	0	0.911172	0.282274	0.949537	0.114951	0.809182	0.997815	0.918154	0.95393	0.110765	0.819519	0.997884	0.0855203	0.0457748	0.106338	0.0104255	0.223997
adenoviridae	Erinaceus concolor	Eulipotyphla	Erinaceidae	FALSE	0	0.709672	0.453762	0.808377	0.313134	0.000155008	0.971344	0.71136	0.808533	0.313168	0.000155574	0.972301	0.0135277	0.00788235	0.0162885	0.00132573	0.030982
adenoviridae	Erinaceus europaeus	Eulipotyphla	Erinaceidae	FALSE	0	0.937514	0.2417	0.968384	0.0853724	0.819338	0.999964	0.972695	0.982968	0.035328	0.9208	0.999984	0.435132	0.43445	0.247462	0.0952554	0.772441
adenoviridae	Erinaceus roumanicus	Eulipotyphla	Erinaceidae	FALSE	0	0.906994	0.293491	0.925192	0.0759408	0.806826	0.994225	0.909946	0.92588	0.0746994	0.809945	0.994444	0.0384996	0.0221498	0.0503773	0.00527553	0.0850423
adenoviridae	Eropeplus canus	Rodentia	Muridae	FALSE	0	0.0103968	0.108436	6.02582e-18	0.0868951	7.70597e-37	6.25954e-06	0.0104414	6.09696e-18	0.0872656	7.83424e-37	6.31745e-06	0.0147369	0.013695	0.00623361	0.00795006	0.0228142
adenoviridae	Erophylla bombifrons	Chiroptera	Phyllostomidae	FALSE	0	0.181479	0.382765	5.16388e-12	0.351935	0	0.895066	0.181513	5.18171e-12	0.351986	0	0.89517	0.00273192	0.00202468	0.00245741	0.000440683	0.00595287
adenoviridae	Erophylla sezekorni	Chiroptera	Phyllostomidae	FALSE	0	0.242542	0.429135	3.19264e-08	0.39138	0	0.941044	0.242592	3.19974e-08	0.391437	0	0.941058	0.00292591	0.00218905	0.00261262	0.000473039	0.00637865
adenoviridae	Erythrocebus baumstarki	Primates	Cercopithecidae	FALSE	0	0.942622	0.234686	0.976335	0.123896	0.858755	0.99951	0.943185	0.976786	0.123719	0.859769	0.999513	0.0145931	0.0112999	0.0126965	0.00218896	0.0317911
adenoviridae	Erythrocebus patas	Primates	Cercopithecidae	TRUE	1	1	0	1	0	1	1	0.985148	0.993466	0.0207891	0.957613	0.999986	0.761098	0.765711	0.116536	0.606348	0.91516
adenoviridae	Euchoreutes naso	Rodentia	Dipodidae	FALSE	0	0.774573	0.422363	0.887083	0.317024	0.0281878	0.996583	0.776663	0.890349	0.317016	0.0294133	0.996745	0.0312358	0.0265356	0.0216444	0.0109768	0.0592478
adenoviridae	Euderma maculatum	Chiroptera	Vespertilionidae	FALSE	0	0.933381	0.250368	0.959381	0.0611943	0.850652	0.997385	0.938089	0.961746	0.05692	0.861246	0.997599	0.076562	0.0742616	0.0183465	0.0555949	0.101196
adenoviridae	Eudiscopus denticulus	Chiroptera	Vespertilionidae	FALSE	0	0.653721	0.479025	0.738766	0.272123	0.0740572	0.898392	0.654649	0.74074	0.272227	0.0747656	0.898793	0.0057728	0.00498968	0.00374982	0.00199752	0.010943
adenoviridae	Eudorcas albonotata	Cetartiodactyla	Bovidae	FALSE	0	0.912477	0.281542	0.934669	0.104089	0.826519	0.990517	0.9128	0.934861	0.103654	0.827054	0.99059	0.00624553	0.00343457	0.00783394	0.000443095	0.0156906
adenoviridae	Eudorcas rufifrons	Cetartiodactyla	Bovidae	FALSE	0	0.887467	0.31438	0.891653	0.0758385	0.781304	0.975832	0.888059	0.892322	0.0754056	0.781915	0.976102	0.00826263	0.00450161	0.0103448	0.000612529	0.0204518
adenoviridae	Eudorcas thomsonii	Cetartiodactyla	Bovidae	FALSE	0	0.938745	0.233554	0.957804	0.0675315	0.857207	0.99858	0.950064	0.968228	0.0546379	0.870307	0.998865	0.192876	0.153489	0.148703	0.0385959	0.398358
adenoviridae	Eudorcas tilonura	Cetartiodactyla	Bovidae	FALSE	0	0.879107	0.325662	0.881828	0.0796109	0.763128	0.979291	0.87949	0.882619	0.0794784	0.763692	0.979422	0.00576128	0.0031883	0.00724806	0.000408749	0.0145113
adenoviridae	Eulemur albifrons	Primates	Lemuridae	FALSE	0	0.861917	0.348639	0.974909	0.263507	0.618593	0.998649	0.871639	0.977594	0.259954	0.661703	0.998842	0.158957	0.151353	0.0544812	0.0973676	0.231428
adenoviridae	Eulemur cinereiceps	Primates	Lemuridae	FALSE	0	0.785591	0.409428	0.95903	0.36549	2.56388e-07	0.999448	0.789078	0.962087	0.366234	2.69889e-07	0.999459	0.0738089	0.064107	0.0462691	0.0263678	0.135423
adenoviridae	Eulemur collaris	Primates	Lemuridae	FALSE	0	0.438901	0.49682	0.130249	0.450707	2.15462e-19	0.995075	0.442291	0.134032	0.452324	2.22546e-19	0.995402	0.0733396	0.0637615	0.0460296	0.0261359	0.13439
adenoviridae	Eulemur coronatus	Primates	Lemuridae	TRUE	1	1	0	1	0	1	1	0.981098	0.998497	0.0384492	0.931845	1	0.0731029	0.0635097	0.0459091	0.0260961	0.134007
adenoviridae	Eulemur flavifrons	Primates	Lemuridae	FALSE	0	0.9427	0.234686	0.991036	0.161686	0.891035	0.999962	0.945026	0.99172	0.161148	0.899776	0.999964	0.0721678	0.0625777	0.0454355	0.025955	0.132138
adenoviridae	Eulemur fulvus	Primates	Lemuridae	FALSE	0	0.983603	0.127388	0.999468	0.0363378	0.95587	0.999999	0.990119	0.99958	0.0220351	0.974168	0.999999	0.367017	0.362001	0.0906537	0.248368	0.482732
adenoviridae	Eulemur macaco	Primates	Lemuridae	TRUE	1	1	0	1	0	1	1	0.983321	0.996115	0.0288486	0.945717	0.999986	0.135097	0.127987	0.0483362	0.0813329	0.201065
adenoviridae	Eulemur mongoz	Primates	Lemuridae	FALSE	0	0.962907	0.185791	0.991369	0.117202	0.908508	0.999957	0.96498	0.991974	0.116508	0.921058	0.99996	0.0827977	0.0723987	0.0509829	0.0300086	0.151778
adenoviridae	Eulemur rubriventer	Primates	Lemuridae	TRUE	1	1	0	1	0	1	1	0.987454	0.998867	0.0242878	0.963657	1	0.282314	0.277095	0.0771893	0.183023	0.378908
adenoviridae	Eulemur rufifrons	Primates	Lemuridae	TRUE	1	1	0	1	0	1	1	0.983132	0.999306	0.0328534	0.943389	1	0.0864713	0.0756311	0.0529581	0.0318545	0.159024
adenoviridae	Eulemur rufus	Primates	Lemuridae	FALSE	0	0.866778	0.338382	0.982639	0.28792	0.58867	0.99988	0.86982	0.983904	0.287278	0.629352	0.999886	0.0790074	0.0690182	0.0489698	0.0283384	0.145726
adenoviridae	Eulemur sanfordi	Primates	Lemuridae	FALSE	0	0.800359	0.397427	0.978795	0.351534	0.000433195	0.999885	0.803382	0.979967	0.350682	0.000487023	0.999889	0.0727596	0.0631379	0.0457349	0.026043	0.133163
adenoviridae	Eumops auripendulus	Chiroptera	Molossidae	FALSE	0	0.602291	0.488373	0.852561	0.424403	3.65816e-09	0.982476	0.607394	0.860412	0.426454	3.92914e-09	0.983637	0.0792783	0.0758145	0.0272582	0.0484434	0.115071
adenoviridae	Eumops bonariensis	Chiroptera	Molossidae	FALSE	0	0.923914	0.266909	0.957544	0.123726	0.832336	0.99702	0.938931	0.96855	0.118656	0.876762	0.997614	0.246988	0.245424	0.0755692	0.146282	0.345082
adenoviridae	Eumops dabbenei	Chiroptera	Molossidae	FALSE	0	0.605767	0.487226	0.830949	0.410436	2.61659e-06	0.972176	0.606119	0.831961	0.410584	2.63096e-06	0.972399	0.00525967	0.00371248	0.00535886	0.00072302	0.0114654
adenoviridae	Eumops delticus	Chiroptera	Molossidae	FALSE	0	0.689319	0.464556	0.905464	0.391903	9.28122e-06	0.981037	0.689725	0.905517	0.392037	9.30608e-06	0.98124	0.0063774	0.00448988	0.00653606	0.000868623	0.0140986
adenoviridae	Eumops ferox	Chiroptera	Molossidae	FALSE	0	0.429153	0.494553	0.556052	0.406494	3.01273e-12	0.935692	0.429591	0.556495	0.406771	3.03396e-12	0.936085	0.0057023	0.00401507	0.0058232	0.000790451	0.0124135
adenoviridae	Eumops floridanus	Chiroptera	Molossidae	FALSE	0	0.521731	0.49965	0.726462	0.377223	1.39258e-09	0.904378	0.522002	0.726688	0.377329	1.39418e-09	0.904649	0.00299452	0.00209617	0.00308974	0.000415368	0.00649067
adenoviridae	Eumops glaucinus	Chiroptera	Molossidae	FALSE	0	0.566711	0.495464	0.801974	0.4191	3.65802e-08	0.981165	0.578149	0.834004	0.424105	4.75789e-08	0.984645	0.157485	0.153112	0.0492819	0.0990565	0.22148
adenoviridae	Eumops hansae	Chiroptera	Molossidae	FALSE	0	0.555434	0.497043	0.846255	0.444459	3.42349e-10	0.970521	0.555776	0.847037	0.444701	3.4498e-10	0.971132	0.00757611	0.00527191	0.00780897	0.00104126	0.0168064
adenoviridae	Eumops maurus	Chiroptera	Molossidae	FALSE	0	0.528229	0.499447	0.787994	0.435707	3.59733e-12	0.965188	0.52855	0.788046	0.435911	3.64831e-12	0.965259	0.00487114	0.00347259	0.00495427	0.000663513	0.0106631
adenoviridae	Eumops nanus	Chiroptera	Molossidae	FALSE	0	0.301292	0.459384	2.46049e-05	0.38508	5.76246e-15	0.881873	0.301497	2.46355e-05	0.385282	5.77855e-15	0.882136	0.00354488	0.00257389	0.00361251	0.000483512	0.00777823
adenoviridae	Eumops patagonicus	Chiroptera	Molossidae	FALSE	0	0.913979	0.287467	0.940734	0.12455	0.823898	0.99502	0.917383	0.943651	0.123424	0.829698	0.995269	0.0512335	0.0486535	0.0180708	0.0301922	0.074919
adenoviridae	Eumops perotis	Chiroptera	Molossidae	FALSE	0	0.600175	0.489107	0.849626	0.416171	1.08323e-05	0.985925	0.605508	0.858445	0.418324	1.30144e-05	0.986893	0.0771183	0.0739392	0.0265176	0.0472231	0.111778
adenoviridae	Eumops trumbulli	Chiroptera	Molossidae	FALSE	0	0.482057	0.499926	0.74688	0.418599	6.68212e-11	0.923954	0.48255	0.748179	0.418898	6.79584e-11	0.924269	0.00737606	0.00514434	0.0075962	0.0010194	0.016296
adenoviridae	Eumops underwoodi	Chiroptera	Molossidae	FALSE	0	0.498343	0.499997	0.745913	0.402781	2.21416e-08	0.940736	0.49889	0.746075	0.402976	2.21449e-08	0.940895	0.00530373	0.00374368	0.00540493	0.000729085	0.011588
adenoviridae	Eumops wilsoni	Chiroptera	Molossidae	FALSE	0	0.178921	0.379796	1.54172e-07	0.314723	1.605e-22	0.785164	0.179031	1.54512e-07	0.314888	1.607e-22	0.785596	0.00299383	0.00209584	0.0030891	0.000415287	0.00648913
adenoviridae	Euneomys chinchilloides	Rodentia	Cricetidae	FALSE	0	0.138074	0.348742	1.98916e-10	0.303958	3.29635e-36	0.759097	0.138166	1.99418e-10	0.304077	3.32651e-36	0.759611	0.00365136	0.00259853	0.00357145	0.000534965	0.00805665
adenoviridae	Euneomys fossor	Rodentia	Cricetidae	FALSE	0	0.0100454	0.0964968	1.41822e-22	0.0863492	0	1.32328e-07	0.0100542	1.42301e-22	0.0864249	0	1.32721e-07	0.00368926	0.00262825	0.00360435	0.000540835	0.00814586
adenoviridae	Euneomys mordax	Rodentia	Cricetidae	FALSE	0	0.100311	0.2928	1.11797e-11	0.266902	8.02674e-32	0.665948	0.100371	1.11803e-11	0.26705	8.06093e-32	0.666555	0.00374056	0.00267122	0.00364915	0.000547577	0.00822562
adenoviridae	Euneomys petersoni	Rodentia	Cricetidae	FALSE	0	0.0523107	0.218563	3.07851e-12	0.184957	3.2887e-27	0.022381	0.0523909	3.08385e-12	0.185168	3.30401e-27	0.0224369	0.00463453	0.00321423	0.00447039	0.00067645	0.00993605
adenoviridae	Euoticus elegantulus	Primates	Galagidae	FALSE	0	0.312808	0.462616	4.99506e-09	0.44575	0	0.999481	0.315344	6.02424e-09	0.447574	0	0.999584	0.141825	0.131998	0.0636713	0.068394	0.230502
adenoviridae	Euoticus pallidus	Primates	Galagidae	FALSE	0	0.115435	0.317203	1.88924e-17	0.298879	0	0.771409	0.115798	1.92747e-17	0.299573	0	0.778282	0.0237851	0.0167656	0.0227407	0.00360127	0.0529419
adenoviridae	Eupetaurus cinereus	Rodentia	Sciuridae	FALSE	0	0.176477	0.379539	2.09636e-17	0.356933	0	0.918253	0.176549	2.12068e-17	0.357026	0	0.918528	0.00413125	0.00321401	0.00373104	0.000696824	0.00883806
adenoviridae	Euphractus sexcinctus	Cingulata	Chlamyphoridae	FALSE	0	0.66143	0.474645	0.900198	0.418427	1.45346e-21	0.99775	0.66206	0.900242	0.418605	1.46515e-21	0.997771	0.0187385	0.0108357	0.0223309	0.00152326	0.0442073
adenoviridae	Eupleres goudotii	Carnivora	Eupleridae	FALSE	0	0.325671	0.467925	0.000670922	0.412739	1.16635e-19	0.919698	0.32617	0.00068611	0.413133	1.16862e-19	0.920039	0.0134387	0.0085883	0.0161185	0.00147151	0.0310614
adenoviridae	Eupleres major	Carnivora	Eupleridae	FALSE	0	0.319079	0.466861	0.000391936	0.412992	8.24881e-18	0.937492	0.319404	0.000392244	0.413279	8.25787e-18	0.938337	0.0091415	0.0056326	0.0111658	0.000949079	0.021525
adenoviridae	Euroscaptor grandis	Eulipotyphla	Talpidae	FALSE	0	0.0122134	0.099005	2.58505e-36	0.102724	0	3.8982e-06	0.0122203	2.61448e-36	0.10277	0	3.9101e-06	0.00656098	0.00401917	0.0081357	0.000697288	0.0147905
adenoviridae	Euroscaptor klossi	Eulipotyphla	Talpidae	FALSE	0	0.0193866	0.144383	4.48844e-32	0.11833	0	1.74277e-07	0.0193966	4.51191e-32	0.118382	0	1.76169e-07	0.0095143	0.00591498	0.0117689	0.00103265	0.0217127
adenoviridae	Euroscaptor longirostris	Eulipotyphla	Talpidae	FALSE	0	0.000560059	0.019996	1.20976e-36	0.00447264	0	4.79956e-07	0.00056369	1.21456e-36	0.00450181	0	4.84864e-07	0.00916968	0.00571524	0.0113448	0.000990515	0.0209586
adenoviridae	Euroscaptor micrura	Eulipotyphla	Talpidae	FALSE	0	0.00181929	0.041196	0	0.0156455	0	1.33333e-12	0.00182556	0	0.0156995	0	1.33853e-12	0.00574608	0.00349788	0.00715188	0.000618453	0.0128918
adenoviridae	Euroscaptor mizura	Eulipotyphla	Talpidae	FALSE	0	0.0388363	0.200589	0	0.160119	0	3.85273e-07	0.0388651	0	0.160223	0	3.87358e-07	0.00589538	0.0035841	0.00733052	0.000633371	0.0131679
adenoviridae	Euroscaptor parvidens	Eulipotyphla	Talpidae	FALSE	0	4.66652e-06	0	0	3.81261e-05	0	8.65463e-12	4.67618e-06	0	3.8202e-05	0	8.67012e-12	0.00529195	0.00316441	0.00661471	0.000567349	0.0118773
adenoviridae	Euryoryzomys emmonsae	Rodentia	Cricetidae	FALSE	0	0.147287	0.350785	5.55581e-09	0.308397	3.14229e-21	0.779931	0.14741	5.57228e-09	0.308604	3.16449e-21	0.780931	0.00433448	0.00302061	0.0041875	0.000625749	0.00941072
adenoviridae	Euryoryzomys lamia	Rodentia	Cricetidae	FALSE	0	0.206024	0.396124	2.4972e-06	0.331545	4.97743e-13	0.776545	0.20624	2.49957e-06	0.3318	4.98941e-13	0.77711	0.00399136	0.00282918	0.00387241	0.000580639	0.00876067
adenoviridae	Euryoryzomys legatus	Rodentia	Cricetidae	FALSE	0	0.117765	0.320465	4.33769e-08	0.277978	3.55515e-19	0.667586	0.117847	4.39121e-08	0.27813	3.59675e-19	0.66843	0.00380294	0.0027054	0.00370405	0.000556834	0.0083554
adenoviridae	Euryoryzomys macconnelli	Rodentia	Cricetidae	FALSE	0	0.150544	0.356187	1.32932e-06	0.31333	4.82433e-18	0.797506	0.150746	1.35504e-06	0.313688	4.87402e-18	0.798664	0.00874359	0.00605316	0.00863112	0.00119038	0.0190069
adenoviridae	Euryoryzomys nitidus	Rodentia	Cricetidae	FALSE	0	0.632809	0.480979	0.846941	0.414421	1.14778e-07	0.990878	0.633257	0.847167	0.414478	1.16224e-07	0.990902	0.00595362	0.00415549	0.00576685	0.000847734	0.012982
adenoviridae	Euryoryzomys russatus	Rodentia	Cricetidae	FALSE	0	0.745401	0.436366	0.829172	0.296485	0.00291692	0.968078	0.746235	0.830389	0.296635	0.00292784	0.96815	0.00764015	0.00527101	0.00748856	0.00105963	0.0165075
adenoviridae	Euryzygomatomys spinosus	Rodentia	Echimyidae	FALSE	0	0.588694	0.492141	0.789348	0.399325	1.15804e-06	0.952172	0.591017	0.79698	0.40045	1.17772e-06	0.953485	0.0311433	0.025496	0.0210539	0.0111124	0.0572414
adenoviridae	Eutamias sibiricus	Rodentia	Sciuridae	FALSE	0	0.883297	0.316837	0.886527	0.0747099	0.780715	0.973951	0.890561	0.894608	0.0702272	0.797231	0.975905	0.0695654	0.0562771	0.0451069	0.0285769	0.132522
adenoviridae	Exilisciurus concinnus	Rodentia	Sciuridae	FALSE	0	6.96125e-11	0	0	5.97049e-10	0	2.0769e-24	7.07775e-11	0	6.07064e-10	0	2.095e-24	0.00453607	0.00354323	0.00405526	0.000781101	0.00969077
adenoviridae	Exilisciurus exilis	Rodentia	Sciuridae	FALSE	0	0.028193	0.170311	2.15713e-32	0.140495	0	1.26949e-05	0.0282387	2.18113e-32	0.140671	0	1.27529e-05	0.00903483	0.00687696	0.00813321	0.00147415	0.019563
adenoviridae	Exilisciurus whiteheadi	Rodentia	Sciuridae	FALSE	0	7.33445e-05	0.0141407	0	0.000479431	0	1.11272e-13	7.43366e-05	0	0.000487135	0	1.12545e-13	0.0050461	0.00389133	0.00448266	0.000852118	0.0108351
adenoviridae	Falsistrellus mackenziei	Chiroptera	Vespertilionidae	FALSE	0	0.677353	0.467471	0.850989	0.369286	0.000123271	0.978084	0.681375	0.856896	0.369803	0.000132039	0.978747	0.0468812	0.0449141	0.0140556	0.0308621	0.0648268
adenoviridae	Falsistrellus mordax	Chiroptera	Vespertilionidae	FALSE	0	0.359908	0.478604	0.0225322	0.408579	1.18845e-16	0.924958	0.360517	0.0227093	0.409038	1.19976e-16	0.925456	0.00915024	0.00817096	0.00556679	0.0033016	0.0160098
adenoviridae	Falsistrellus petersi	Chiroptera	Vespertilionidae	FALSE	0	0.153281	0.362	3.28329e-13	0.328996	0	0.842881	0.153411	3.29937e-13	0.329214	0	0.844184	0.00654066	0.00573697	0.00412096	0.00231549	0.0119808
adenoviridae	Falsistrellus tasmaniensis	Chiroptera	Vespertilionidae	FALSE	0	0.529673	0.499019	0.777352	0.406444	4.84404e-07	0.955783	0.530544	0.778597	0.406925	4.92839e-07	0.956655	0.0106499	0.00943215	0.00646892	0.00378912	0.0186579
adenoviridae	Felis bieti	Carnivora	Felidae	FALSE	0	0.885817	0.320105	0.975738	0.227381	0.753336	0.999994	0.886276	0.975922	0.22719	0.755971	0.999994	0.0103973	0.00653034	0.0122788	0.00106842	0.0228452
adenoviridae	Felis chaus	Carnivora	Felidae	FALSE	0	0.887337	0.309748	0.970551	0.22494	0.744444	0.999588	0.893037	0.973139	0.224028	0.760945	0.999596	0.117737	0.101512	0.0858319	0.0249082	0.235588
adenoviridae	Felis margarita	Carnivora	Felidae	FALSE	0	0.91523	0.278882	0.976041	0.177565	0.770194	0.999889	0.921803	0.979185	0.173944	0.808779	0.999899	0.12162	0.105848	0.0922754	0.0227227	0.245768
adenoviridae	Felis nigripes	Carnivora	Felidae	FALSE	0	0.931798	0.250368	0.997196	0.1633	0.838746	1	0.948109	0.997798	0.143251	0.87093	1	0.263632	0.249369	0.179396	0.0525994	0.504195
adenoviridae	Felis silvestris	Carnivora	Felidae	FALSE	0	0.917879	0.273142	0.997823	0.173272	0.673623	1	0.987035	0.999522	0.0285353	0.961128	1	0.626727	0.728155	0.312353	0.183994	0.966371
adenoviridae	Felovia vae	Rodentia	Ctenodactylidae	FALSE	0	0.106614	0.308221	4.96468e-17	0.284779	0	0.639372	0.10676	5.08524e-17	0.285057	0	0.642123	0.00913131	0.00638129	0.00930145	0.00128569	0.0203124
adenoviridae	Feroculus feroculus	Eulipotyphla	Soricidae	FALSE	0	0.0434298	0.207523	6.38799e-20	0.172585	0	0.00110109	0.0434548	6.43044e-20	0.172668	0	0.00110296	0.00436091	0.00320688	0.00445857	0.000961995	0.00870151
adenoviridae	Fossa fossana	Carnivora	Eupleridae	FALSE	0	0.432167	0.495545	0.16302	0.443034	3.27996e-15	0.988819	0.432674	0.164769	0.443359	3.28674e-15	0.988895	0.0136128	0.00870873	0.0163217	0.00149077	0.0315557
adenoviridae	Fukomys anselli	Rodentia	Bathyergidae	FALSE	0	0.160184	0.363706	1.40266e-10	0.334936	7.81907e-35	0.84195	0.16033	1.40576e-10	0.335178	7.86955e-35	0.843006	0.00757507	0.00540728	0.00755193	0.00117496	0.0163624
adenoviridae	Fukomys bocagei	Rodentia	Bathyergidae	FALSE	0	0.0112457	0.109778	0	0.0967361	0	1.48097e-15	0.0112558	0	0.0968229	0	1.48991e-15	0.0092445	0.0065884	0.00925392	0.00146695	0.0195565
adenoviridae	Fukomys damarensis	Rodentia	Bathyergidae	FALSE	0	0.0438467	0.196896	1.63845e-24	0.177356	0	0.000973558	0.0438953	1.64108e-24	0.177508	0	0.000981805	0.0112378	0.00793766	0.0113744	0.00177252	0.0243765
adenoviridae	Fukomys darlingi	Rodentia	Bathyergidae	FALSE	0	0.0544297	0.221218	4.11019e-26	0.222394	0	0.000375132	0.0544366	4.14703e-26	0.222412	0	0.000375658	0.0088815	0.00639721	0.00887591	0.00140867	0.0190026
adenoviridae	Fukomys foxi	Rodentia	Bathyergidae	FALSE	0	0.368836	0.481233	1.56918e-05	0.446714	3.76136e-35	0.978863	0.369085	1.5768e-05	0.446962	3.80289e-35	0.978906	0.00752657	0.00537676	0.0075042	0.00116998	0.0162754
adenoviridae	Fukomys kafuensis	Rodentia	Bathyergidae	FALSE	0	0.011579	0.108436	2.22839e-38	0.0995575	0	1.44449e-13	0.0115837	2.25346e-38	0.0995974	0	1.496e-13	0.00759242	0.0054182	0.00756904	0.00117674	0.0164149
adenoviridae	Fukomys ochraceocinereus	Rodentia	Bathyergidae	FALSE	0	0.0465275	0.211853	1.38598e-25	0.187207	0	0.000591045	0.0465872	1.41602e-25	0.187371	0	0.000602738	0.010665	0.0074886	0.0107593	0.00166249	0.0227948
adenoviridae	Fukomys vandewoestijneae	Rodentia	Bathyergidae	FALSE	0	0.245178	0.428053	1.3561e-07	0.383639	3.30286e-23	0.970866	0.245438	1.37487e-07	0.383943	3.32465e-23	0.970902	0.0074807	0.00535015	0.00745919	0.00116414	0.0162363
adenoviridae	Fukomys zechi	Rodentia	Bathyergidae	FALSE	0	0.0465139	0.207304	5.86307e-27	0.192393	0	4.841e-05	0.0465405	5.91335e-27	0.192469	0	4.86072e-05	0.00762881	0.00544239	0.00760495	0.00118077	0.016525
adenoviridae	Funambulus layardi	Rodentia	Sciuridae	FALSE	0	0.191882	0.393717	3.76137e-08	0.366065	2.59052e-26	0.913638	0.191947	3.77726e-08	0.366173	2.59457e-26	0.913979	0.00395369	0.00307063	0.00359415	0.000672021	0.00834818
adenoviridae	Funambulus obscurus	Rodentia	Sciuridae	FALSE	0	0.0576136	0.237487	8.21551e-22	0.215738	0	0.000586283	0.0576403	8.23435e-22	0.21582	0	0.000587156	0.00398838	0.00309093	0.0036206	0.000678016	0.00849817
adenoviridae	Funambulus palmarum	Rodentia	Sciuridae	FALSE	0	0.423046	0.494919	0.00325957	0.455199	1.48062e-19	0.989689	0.423299	0.00326777	0.455429	1.49442e-19	0.989768	0.00780415	0.00594803	0.00697762	0.00129904	0.0165595
adenoviridae	Funambulus pennantii	Rodentia	Sciuridae	FALSE	0	0.477401	0.499714	0.74774	0.463051	1.25346e-15	0.999088	0.47859	0.755154	0.463868	1.27935e-15	0.999107	0.0327989	0.0267982	0.0214783	0.013455	0.0601261
adenoviridae	Funambulus sublineatus	Rodentia	Sciuridae	FALSE	0	0.184787	0.38781	2.97531e-11	0.361665	0	0.897152	0.184888	2.97906e-11	0.361837	0	0.897489	0.00682204	0.00522228	0.00606741	0.00113719	0.014718
adenoviridae	Funambulus tristriatus	Rodentia	Sciuridae	FALSE	0	0.407014	0.493591	0.000608172	0.447922	3.45583e-22	0.98364	0.408116	0.000619293	0.448908	3.59364e-22	0.984097	0.0291294	0.0238885	0.0191929	0.0118238	0.0527074
adenoviridae	Funisciurus anerythrus	Rodentia	Sciuridae	FALSE	0	0.76763	0.419153	0.961577	0.374945	1.29266e-06	0.999509	0.768957	0.962137	0.375166	1.34169e-06	0.999515	0.0358367	0.0293145	0.0233819	0.0146381	0.0658501
adenoviridae	Funisciurus bayonii	Rodentia	Sciuridae	FALSE	0	0.223356	0.412614	2.54384e-08	0.373852	5.30105e-38	0.895182	0.223491	2.55621e-08	0.374046	5.30885e-38	0.895671	0.0047038	0.00363418	0.00419378	0.000811329	0.0100058
adenoviridae	Funisciurus carruthersi	Rodentia	Sciuridae	FALSE	0	0.72582	0.445246	0.940168	0.397432	2.45746e-06	0.998652	0.726796	0.943345	0.397627	2.4881e-06	0.998682	0.0239177	0.0196272	0.0160175	0.00940797	0.0431006
adenoviridae	Funisciurus congicus	Rodentia	Sciuridae	FALSE	0	0.730255	0.442392	0.929351	0.388078	2.01574e-06	0.999397	0.731613	0.930704	0.388193	2.13771e-06	0.999418	0.0295046	0.0242584	0.0194254	0.0119952	0.053407
adenoviridae	Funisciurus duchaillui	Rodentia	Sciuridae	FALSE	0	0.00914473	0.0896348	3.85326e-32	0.0755974	0	4.44544e-07	0.00915428	3.86569e-32	0.0756385	0	4.45994e-07	0.00400011	0.00309982	0.00362959	0.000679034	0.00853072
adenoviridae	Funisciurus isabella	Rodentia	Sciuridae	FALSE	0	0.0135913	0.11666	3.56936e-23	0.0958672	0	2.33355e-05	0.0136097	3.57887e-23	0.095934	0	2.34548e-05	0.00731456	0.00556988	0.00652204	0.00123185	0.0156586
adenoviridae	Funisciurus lemniscatus	Rodentia	Sciuridae	FALSE	0	0.683139	0.462944	0.920532	0.41083	3.92955e-08	0.996685	0.684501	0.922537	0.41117	3.9802e-08	0.9968	0.0319162	0.0261128	0.0209266	0.0130493	0.0583192
adenoviridae	Funisciurus leucogenys	Rodentia	Sciuridae	FALSE	0	1.90443e-07	0	0	1.40793e-06	0	7.89692e-11	1.91443e-07	0	1.41573e-06	0	7.9172e-11	0.00696079	0.00532449	0.00619505	0.00116501	0.01491
adenoviridae	Funisciurus pyrropus	Rodentia	Sciuridae	FALSE	0	0.765087	0.424124	0.966828	0.375989	1.33989e-06	0.999578	0.76797	0.969104	0.376363	1.58019e-06	0.999622	0.0736197	0.0596978	0.047421	0.0303278	0.139703
adenoviridae	Funisciurus substriatus	Rodentia	Sciuridae	FALSE	0	0.819858	0.385018	0.937971	0.308359	0.00336229	0.996014	0.820094	0.9381	0.308398	0.00336826	0.996026	0.00446859	0.00347762	0.00400018	0.000769074	0.00960078
adenoviridae	Furipterus horrens	Chiroptera	Furipteridae	FALSE	0	0.270364	0.444425	1.57526e-05	0.399301	1.47925e-21	0.92083	0.270643	1.58001e-05	0.399575	1.49053e-21	0.921754	0.0100801	0.00672408	0.0110962	0.00121067	0.0228739
adenoviridae	Galago gallarum	Primates	Galagidae	FALSE	0	0.376939	0.482289	0.000234057	0.444393	2.97267e-25	0.983264	0.377628	0.000237382	0.444929	3.12102e-25	0.983387	0.0215068	0.0151542	0.020699	0.00316595	0.0477143
adenoviridae	Galago matschiei	Primates	Galagidae	FALSE	0	0.452984	0.497247	0.334566	0.456162	7.00243e-21	0.989849	0.45379	0.339037	0.456631	7.13417e-21	0.98992	0.0244345	0.0172756	0.0233268	0.00372218	0.0540948
adenoviridae	Galago moholi	Primates	Galagidae	FALSE	0	0.379051	0.485436	0.000538211	0.43732	1.10266e-26	0.975513	0.380211	0.000553129	0.438341	1.11064e-26	0.975876	0.0361853	0.0261672	0.0340025	0.0051933	0.0815356
adenoviridae	Galago senegalensis	Primates	Galagidae	FALSE	0	0.484133	0.499915	0.70475	0.461819	3.28772e-13	0.997724	0.494534	0.754114	0.468808	4.18166e-13	0.998443	0.277487	0.270592	0.106728	0.149193	0.42265
adenoviridae	Galagoides demidoff	Primates	Galagidae	FALSE	0	0.283431	0.449244	5.81782e-11	0.419219	0	0.986501	0.289707	6.59567e-11	0.426611	0	0.990548	0.163226	0.152325	0.072643	0.0792952	0.264454
adenoviridae	Galagoides thomasi	Primates	Galagidae	FALSE	0	0.293962	0.454085	1.30771e-09	0.432043	7.2195e-37	0.993353	0.29504	1.33983e-09	0.433305	7.335e-37	0.993407	0.0423414	0.0310591	0.0395316	0.00595814	0.0951658
adenoviridae	Galea comes	Rodentia	Caviidae	FALSE	0	0.105602	0.306166	0	0.280678	0	0.706233	0.10572	0	0.280924	0	0.706855	0.0138542	0.0112084	0.011049	0.00372901	0.0273932
adenoviridae	Galea flavidens	Rodentia	Caviidae	FALSE	0	0.507564	0.499863	0.730068	0.449428	0	0.999568	0.508127	0.732033	0.449763	0	0.999573	0.0129228	0.0102932	0.0102993	0.00347379	0.0253357
adenoviridae	Galea leucoblephara	Rodentia	Caviidae	FALSE	0	0.173674	0.37484	1.70121e-24	0.350671	0	0.864786	0.17393	1.7491e-24	0.351109	0	0.865489	0.0217192	0.0169126	0.0178959	0.00576789	0.0436728
adenoviridae	Galea musteloides	Rodentia	Caviidae	FALSE	0	0.162342	0.36642	1.13499e-23	0.337314	0	0.861215	0.162529	1.14973e-23	0.337614	0	0.861658	0.0149728	0.012084	0.0119791	0.00400807	0.0297559
adenoviridae	Galea spixii	Rodentia	Caviidae	FALSE	0	0.498658	0.499898	0.721729	0.455774	0	0.999967	0.499808	0.734111	0.456474	0	0.999968	0.0249834	0.0192324	0.0208046	0.00647128	0.0512181
adenoviridae	Galenomys garleppi	Rodentia	Cricetidae	FALSE	0	6.041e-06	0	2.35376e-30	3.48487e-05	0	1.05106e-09	6.0608e-06	2.36686e-30	3.49692e-05	0	1.05141e-09	0.0037458	0.00267429	0.00365375	0.000548266	0.00823651
adenoviridae	Galeopterus variegatus	Dermoptera	Cynocephalidae	FALSE	0	0.436526	0.494583	0.04148	0.461953	3.02041e-24	0.992015	0.437258	0.0415045	0.462484	3.07383e-24	0.992057	0.0220048	0.0114935	0.0286588	0.00159079	0.0549069
adenoviridae	Galictis cuja	Carnivora	Mustelidae	FALSE	0	0.860003	0.348331	0.947453	0.247188	0.680223	0.999577	0.868851	0.951906	0.246455	0.720841	0.999624	0.144534	0.132085	0.06954	0.0657183	0.236941
adenoviridae	Galictis vittata	Carnivora	Mustelidae	FALSE	0	0.583234	0.49313	0.856112	0.447889	2.33672e-15	0.999978	0.583774	0.857474	0.448072	2.3627e-15	0.999978	0.0182154	0.0118374	0.0197509	0.00232095	0.0413557
adenoviridae	Galidia elegans	Carnivora	Eupleridae	FALSE	0	0.777439	0.414853	0.897594	0.314716	0.0565643	0.999534	0.784718	0.903807	0.314712	0.0603912	0.999567	0.0931329	0.0867965	0.0529417	0.0314992	0.164064
adenoviridae	Galidictis fasciata	Carnivora	Eupleridae	FALSE	0	0.0506963	0.219179	0	0.21363	0	5.85519e-08	0.0507059	0	0.21367	0	5.87728e-08	0.0132748	0.00847457	0.0159271	0.00145339	0.0307481
adenoviridae	Galidictis grandidieri	Carnivora	Eupleridae	FALSE	0	0.23459	0.42763	7.04904e-07	0.380369	1.12141e-35	0.891439	0.234818	7.05367e-07	0.380653	1.12713e-35	0.891592	0.00811252	0.0049953	0.0100262	0.000826391	0.0193434
adenoviridae	Gardnerycteris crenulatum	Chiroptera	Phyllostomidae	FALSE	0	0.65807	0.474012	0.971129	0.453278	5.54941e-09	0.999995	0.661214	0.975503	0.454557	7.76271e-09	0.999995	0.165765	0.160601	0.0472961	0.108914	0.22927
adenoviridae	Gardnerycteris koepckeae	Chiroptera	Phyllostomidae	FALSE	0	0.351303	0.477314	6.54928e-06	0.445711	2.50481e-31	0.988985	0.351348	6.5615e-06	0.44576	2.50718e-31	0.988997	0.00227392	0.00165518	0.0021075	0.000362081	0.00510674
adenoviridae	Gazella arabica	Cetartiodactyla	Bovidae	FALSE	0	0.913796	0.286611	0.924194	0.0691862	0.807512	0.991048	0.916009	0.925872	0.0674016	0.817372	0.991161	0.0281769	0.0197239	0.0279433	0.00557553	0.0624716
adenoviridae	Gazella bennettii	Cetartiodactyla	Bovidae	FALSE	0	0.955444	0.208834	0.981748	0.0643876	0.869232	0.999953	0.960379	0.985232	0.0570321	0.882185	0.999957	0.124979	0.0854396	0.110573	0.0245971	0.273207
adenoviridae	Gazella cuvieri	Cetartiodactyla	Bovidae	FALSE	0	0.862582	0.346259	0.878452	0.14075	0.79594	0.976635	0.863033	0.878734	0.140636	0.796203	0.976716	0.00601288	0.00332086	0.00755126	0.000427308	0.0152219
adenoviridae	Gazella dorcas	Cetartiodactyla	Bovidae	FALSE	0	0.942226	0.238226	0.958671	0.0578519	0.864805	0.998447	0.945912	0.961209	0.0549122	0.867111	0.998689	0.0787135	0.0525708	0.0759434	0.0147657	0.174814
adenoviridae	Gazella gazella	Cetartiodactyla	Bovidae	FALSE	0	0.897397	0.309113	0.924311	0.132595	0.795311	0.990279	0.913436	0.938516	0.124148	0.829347	0.991839	0.172777	0.132705	0.138281	0.0339517	0.360522
adenoviridae	Gazella leptoceros	Cetartiodactyla	Bovidae	FALSE	0	0.868828	0.332524	0.913763	0.150975	0.767832	0.977061	0.871024	0.914116	0.150306	0.772631	0.97735	0.0222528	0.0152079	0.022168	0.0043778	0.0498657
adenoviridae	Gazella marica	Cetartiodactyla	Bovidae	FALSE	0	0.902987	0.299198	0.932259	0.126311	0.783845	0.98841	0.90367	0.932269	0.12598	0.784009	0.988621	0.011117	0.00594174	0.0139712	0.000791227	0.0282069
adenoviridae	Gazella spekei	Cetartiodactyla	Bovidae	FALSE	0	0.793261	0.403921	0.879721	0.267123	0.49795	0.992546	0.795302	0.88118	0.267236	0.499858	0.992637	0.0222638	0.0152199	0.0221786	0.00437974	0.0498897
adenoviridae	Gazella subgutturosa	Cetartiodactyla	Bovidae	FALSE	0	0.910921	0.289449	0.947356	0.108227	0.818596	0.996967	0.934143	0.956817	0.066102	0.840682	0.99726	0.228747	0.18268	0.16815	0.0510445	0.467211
adenoviridae	Genetta abyssinica	Carnivora	Viverridae	FALSE	0	0.355767	0.479795	5.74894e-06	0.416197	4.60597e-30	0.919197	0.356314	5.94189e-06	0.416786	4.63501e-30	0.919372	0.0116125	0.00737239	0.0139796	0.00128289	0.0261987
adenoviridae	Genetta angolensis	Carnivora	Viverridae	FALSE	0	0.0723389	0.259643	0	0.245805	0	8.74567e-06	0.0724115	0	0.246027	0	8.78013e-06	0.0111887	0.00712676	0.0134792	0.00122444	0.0252303
adenoviridae	Genetta bourloni	Carnivora	Viverridae	FALSE	0	0.205411	0.402969	6.02646e-08	0.348009	4.34956e-35	0.839081	0.205603	6.03051e-08	0.348289	4.44839e-35	0.840046	0.0105969	0.00671531	0.0127831	0.0011436	0.0237064
adenoviridae	Genetta cristata	Carnivora	Viverridae	FALSE	0	0.686139	0.46663	0.885378	0.394803	2.98167e-08	0.998907	0.68681	0.886526	0.394826	2.99913e-08	0.99891	0.0105489	0.00667209	0.0127268	0.00113705	0.0235869
adenoviridae	Genetta genetta	Carnivora	Viverridae	FALSE	0	0.945085	0.225623	0.993235	0.130575	0.860434	0.999998	0.96184	0.996112	0.120952	0.923985	0.999999	0.437633	0.461807	0.221968	0.122496	0.716957
adenoviridae	Genetta johnstoni	Carnivora	Viverridae	FALSE	0	0.215995	0.408372	1.25152e-07	0.357177	8.24338e-33	0.864607	0.216221	1.2675e-07	0.357503	8.28671e-33	0.865147	0.01277	0.00804592	0.0153505	0.00140516	0.0293002
adenoviridae	Genetta maculata	Carnivora	Viverridae	FALSE	0	0.928961	0.25649	0.973507	0.12804	0.79256	0.998423	0.935078	0.977052	0.124675	0.817934	0.99849	0.124811	0.11104	0.0813577	0.0309362	0.232629
adenoviridae	Genetta pardina	Carnivora	Viverridae	FALSE	0	0.748023	0.436534	0.880613	0.326872	0.00304024	0.995608	0.749124	0.882569	0.326896	0.00306248	0.995758	0.0163259	0.0103841	0.0195574	0.0018241	0.0375863
adenoviridae	Genetta poensis	Carnivora	Viverridae	FALSE	0	0.212252	0.4111	8.265e-10	0.354477	1.24656e-35	0.897874	0.21243	8.2698e-10	0.354699	1.27004e-35	0.898055	0.00885349	0.00557726	0.0107637	0.00094099	0.0201072
adenoviridae	Genetta servalina	Carnivora	Viverridae	FALSE	0	0.151111	0.359215	1.6088e-10	0.317568	0	0.770649	0.151515	1.62037e-10	0.318321	0	0.771552	0.01962	0.0123742	0.0234	0.00220388	0.0445464
adenoviridae	Genetta thierryi	Carnivora	Viverridae	FALSE	0	0.0604	0.243143	1.09794e-38	0.226151	0	6.46616e-05	0.0604259	1.10266e-38	0.226246	0	6.55753e-05	0.0169909	0.0108051	0.0203386	0.00190356	0.0388273
adenoviridae	Genetta tigrina	Carnivora	Viverridae	FALSE	0	0.873136	0.33751	0.904443	0.161553	0.770887	0.992152	0.878403	0.906048	0.159999	0.776937	0.992783	0.0671559	0.0582434	0.0455792	0.015407	0.126396
adenoviridae	Genetta victoriae	Carnivora	Viverridae	FALSE	0	0.55125	0.496648	0.76227	0.409857	3.86401e-11	0.987243	0.552188	0.763383	0.410456	3.89244e-11	0.987313	0.015619	0.00987171	0.0187245	0.00173994	0.0362491
adenoviridae	Geocapromys brownii	Rodentia	Capromyidae	FALSE	0	0.10682	0.308221	5.67206e-34	0.283943	0	0.682592	0.106992	5.72036e-34	0.284211	0	0.684495	0.00753582	0.0056018	0.00717695	0.00103822	0.0163544
adenoviridae	Geocapromys ingrahami	Rodentia	Capromyidae	FALSE	0	0.08949	0.286754	0	0.278673	0	0.0130102	0.0895131	0	0.27873	0	0.0131272	0.00752064	0.0055939	0.00716403	0.00103624	0.0163157
adenoviridae	Geogale aurita	Afrosoricida	Tenrecidae	FALSE	0	0.0485759	0.21035	9.51265e-35	0.205255	0	8.37766e-05	0.0486769	9.67126e-35	0.205607	0	8.38524e-05	0.00740913	0.00408157	0.011033	0.000605951	0.017067
adenoviridae	Geomys arenarius	Rodentia	Geomyidae	FALSE	0	0.470193	0.499466	0.635338	0.413235	2.64399e-16	0.941817	0.470672	0.636825	0.413532	2.66685e-16	0.941932	0.0077651	0.00538085	0.00767591	0.00116437	0.017006
adenoviridae	Geomys attwateri	Rodentia	Geomyidae	FALSE	0	0.485512	0.49982	0.735922	0.428585	1.35357e-12	0.955309	0.485855	0.735991	0.428807	1.36193e-12	0.955611	0.00728953	0.00509181	0.00727326	0.00107564	0.0156278
adenoviridae	Geomys breviceps	Rodentia	Geomyidae	FALSE	0	0.460256	0.498731	0.628233	0.425117	2.06282e-15	0.936229	0.460634	0.628853	0.425376	2.09598e-15	0.9364	0.00784688	0.0054665	0.00774634	0.00117396	0.0172016
adenoviridae	Geomys bursarius	Rodentia	Geomyidae	FALSE	0	0.534951	0.49871	0.797552	0.445819	8.47703e-15	0.998038	0.535926	0.798443	0.446291	8.71192e-15	0.998124	0.026599	0.0213918	0.018279	0.00929846	0.0509499
adenoviridae	Geomys knoxjonesi	Rodentia	Geomyidae	FALSE	0	0.500903	0.499972	0.755519	0.434828	6.77327e-13	0.972619	0.50122	0.755585	0.435019	6.82126e-13	0.972669	0.00739441	0.00517454	0.00736097	0.00109214	0.01593
adenoviridae	Geomys personatus	Rodentia	Geomyidae	FALSE	0	0.107687	0.311639	3.14744e-12	0.258463	0	0.635367	0.107828	3.16652e-12	0.258737	0	0.636092	0.00725392	0.00506047	0.00724363	0.00107004	0.0155274
adenoviridae	Geomys pinetis	Rodentia	Geomyidae	FALSE	0	0.116629	0.320584	1.14601e-10	0.264634	0	0.663531	0.116897	1.14957e-10	0.265145	0	0.664868	0.00824761	0.00571692	0.008096	0.00125563	0.0182206
adenoviridae	Geomys texensis	Rodentia	Geomyidae	FALSE	0	0.518047	0.499687	0.786853	0.440742	1.21419e-13	0.990047	0.518334	0.78744	0.440908	1.22882e-13	0.990103	0.00720013	0.0050243	0.00719902	0.00106158	0.0153727
adenoviridae	Geomys tropicalis	Rodentia	Geomyidae	FALSE	0	0.145845	0.353106	1.47114e-09	0.301364	1.45585e-38	0.718174	0.146067	1.47806e-09	0.301696	1.46343e-38	0.719002	0.00712026	0.004942	0.0071331	0.00104397	0.0150635
adenoviridae	Georychus capensis	Rodentia	Bathyergidae	FALSE	0	0.404011	0.491705	0.000587059	0.452706	8.40335e-25	0.994529	0.404293	0.000593304	0.452883	8.43837e-25	0.994558	0.00993178	0.00703793	0.0099779	0.00154562	0.0210262
adenoviridae	Geoxus annectens	Rodentia	Cricetidae	FALSE	0	0.216978	0.409917	4.25762e-08	0.363727	2.6229e-35	0.906821	0.217113	4.28999e-08	0.363897	2.63106e-35	0.907465	0.00371829	0.00265436	0.00362966	0.00054465	0.00817928
adenoviridae	Geoxus valdivianus	Rodentia	Cricetidae	FALSE	0	0.150297	0.359987	6.57684e-12	0.32099	0	0.871963	0.15039	6.637e-12	0.321184	0	0.872321	0.00477737	0.00331619	0.00460705	0.000689678	0.0102402
adenoviridae	Gerbilliscus afra	Rodentia	Muridae	FALSE	0	0.408648	0.491833	0.0871636	0.425469	4.29518e-14	0.955492	0.409449	0.0880861	0.426096	4.36358e-14	0.955892	0.0169505	0.0157344	0.00724293	0.00891274	0.0263306
adenoviridae	Gerbilliscus boehmi	Rodentia	Muridae	FALSE	0	0.725315	0.448557	0.85727	0.325606	0.00104804	0.963952	0.72724	0.861355	0.325812	0.00107508	0.964646	0.0236608	0.0215946	0.0107732	0.0118623	0.0377114
adenoviridae	Gerbilliscus brantsii	Rodentia	Muridae	FALSE	0	0.845459	0.358244	0.870842	0.167937	0.775921	0.965367	0.850747	0.881511	0.167387	0.785086	0.966247	0.0495296	0.0452538	0.0206466	0.0278401	0.0765606
adenoviridae	Gerbilliscus gambiana	Rodentia	Muridae	FALSE	0	0.857702	0.348639	0.897824	0.187771	0.781149	0.970108	0.858983	0.898674	0.187704	0.783262	0.970559	0.0173234	0.0160437	0.00742422	0.00910392	0.0268366
adenoviridae	Gerbilliscus guineae	Rodentia	Muridae	FALSE	0	0.818378	0.385349	0.871799	0.215019	0.694332	0.967662	0.820489	0.874583	0.214983	0.700111	0.96822	0.0240546	0.0219434	0.0109912	0.0120195	0.0384869
adenoviridae	Gerbilliscus inclusus	Rodentia	Muridae	FALSE	0	0.88926	0.317325	0.923422	0.147799	0.822347	0.981939	0.890261	0.924102	0.147584	0.824782	0.98212	0.0150349	0.0139257	0.00636163	0.00807044	0.0234458
adenoviridae	Gerbilliscus kempi	Rodentia	Muridae	TRUE	1	1	0	1	0	1	1	0.934165	0.946987	0.0554071	0.854018	0.995949	0.266856	0.245214	0.105599	0.152364	0.416371
adenoviridae	Gerbilliscus leucogaster	Rodentia	Muridae	FALSE	0	0.906276	0.290432	0.942579	0.0964756	0.77291	0.991684	0.931065	0.955456	0.0704413	0.824128	0.993819	0.277066	0.254467	0.107862	0.158111	0.428522
adenoviridae	Gerbilliscus nigricaudus	Rodentia	Muridae	FALSE	0	0.62774	0.482588	0.823369	0.398003	8.29557e-08	0.98051	0.629423	0.828223	0.398529	8.72988e-08	0.980895	0.0250346	0.0228251	0.0115367	0.0124385	0.0398114
adenoviridae	Gerbilliscus phillipsi	Rodentia	Muridae	FALSE	0	0.652874	0.476176	0.792299	0.33479	8.80807e-06	0.931525	0.654237	0.794905	0.335242	8.91338e-06	0.93221	0.0140746	0.0130963	0.00596001	0.00752209	0.021868
adenoviridae	Gerbilliscus robustus	Rodentia	Muridae	FALSE	0	0.803048	0.397275	0.867897	0.247997	0.652224	0.985744	0.806	0.870526	0.247751	0.661748	0.986025	0.0337641	0.03034	0.0164777	0.0161183	0.0547838
adenoviridae	Gerbilliscus validus	Rodentia	Muridae	FALSE	0	0.906321	0.280807	0.912043	0.0665449	0.811119	0.986725	0.911102	0.916183	0.0630387	0.819625	0.987404	0.0576921	0.0524197	0.024168	0.0322179	0.0897282
adenoviridae	Gerbillurus paeba	Rodentia	Muridae	FALSE	0	0.522222	0.499571	0.745165	0.427912	3.31676e-12	0.957904	0.523708	0.747732	0.428736	3.40871e-12	0.958721	0.0292647	0.0265092	0.0139204	0.0142826	0.0471165
adenoviridae	Gerbillurus setzeri	Rodentia	Muridae	FALSE	0	0.320884	0.466283	0.000163094	0.407191	9.74316e-15	0.892214	0.321509	0.000164447	0.40779	9.93321e-15	0.892853	0.0140218	0.0130668	0.00593889	0.00751162	0.0217973
adenoviridae	Gerbillurus tytonis	Rodentia	Muridae	FALSE	0	0.31914	0.466861	0.000260412	0.402568	1.15376e-20	0.92046	0.319706	0.000263799	0.403058	1.15951e-20	0.92151	0.0138319	0.0129038	0.00586384	0.00745986	0.0215156
adenoviridae	Gerbillurus vallinus	Rodentia	Muridae	FALSE	0	0.335517	0.47014	0.00718271	0.402594	1.34639e-11	0.912967	0.336299	0.00725769	0.403156	1.35729e-11	0.913857	0.0159042	0.0147044	0.00675006	0.00840805	0.0247227
adenoviridae	Gerbillus acticola	Rodentia	Muridae	FALSE	0	0.0954512	0.294728	5.95276e-11	0.248182	3.26672e-26	0.576415	0.0957077	6.04052e-11	0.248746	3.31344e-26	0.578731	0.0138211	0.0128962	0.00585961	0.00745237	0.0215003
adenoviridae	Gerbillus amoenus	Rodentia	Muridae	FALSE	0	0.435771	0.495545	0.611405	0.419519	2.33696e-09	0.916102	0.436535	0.613984	0.42003	2.35578e-09	0.917004	0.0144528	0.0134294	0.00611437	0.00775185	0.0224078
adenoviridae	Gerbillus andersoni	Rodentia	Muridae	FALSE	0	0.281009	0.448508	2.36937e-05	0.391892	4.47135e-22	0.902365	0.281549	2.3928e-05	0.392441	4.53153e-22	0.903506	0.0146092	0.0135739	0.00617966	0.0078258	0.0226284
adenoviridae	Gerbillus aquilus	Rodentia	Muridae	FALSE	0	0.562938	0.495062	0.805343	0.43396	1.19871e-09	0.986635	0.563682	0.80691	0.434302	1.21133e-09	0.986844	0.0151341	0.0140083	0.00640484	0.00809904	0.0236402
adenoviridae	Gerbillus bottai	Rodentia	Muridae	FALSE	0	0.256173	0.435128	0.00289543	0.340205	1.92725e-15	0.777002	0.256971	0.00290537	0.341029	1.97288e-15	0.779163	0.0137303	0.0128415	0.00582428	0.00739145	0.021372
adenoviridae	Gerbillus brockmani	Rodentia	Muridae	FALSE	0	0.0962282	0.299332	1.05623e-12	0.256401	1.44983e-31	0.57451	0.0964531	1.0718e-12	0.256879	1.46554e-31	0.576608	0.0133499	0.012485	0.00568003	0.00725043	0.0206849
adenoviridae	Gerbillus campestris	Rodentia	Muridae	FALSE	0	0.34605	0.476176	0.00770103	0.382536	1.36212e-12	0.861955	0.347405	0.00793471	0.383749	1.38364e-12	0.863241	0.0239587	0.0218563	0.0109381	0.0119812	0.0383011
adenoviridae	Gerbillus cheesmani	Rodentia	Muridae	FALSE	0	0.633311	0.483259	0.828503	0.392302	7.68846e-08	0.978342	0.6347	0.831017	0.392687	7.87406e-08	0.978778	0.020281	0.0187068	0.00893855	0.010474	0.0320241
adenoviridae	Gerbillus cosensis	Rodentia	Muridae	FALSE	0	0.443375	0.497172	0.586229	0.380362	3.47775e-10	0.889925	0.444561	0.589642	0.381078	3.53677e-10	0.890982	0.0155981	0.0144288	0.00661089	0.00827079	0.0242166
adenoviridae	Gerbillus dasyurus	Rodentia	Muridae	FALSE	0	0.543422	0.497767	0.769369	0.403153	5.10401e-07	0.938809	0.549951	0.777647	0.406196	5.52907e-07	0.94573	0.0778924	0.0681405	0.037045	0.041851	0.126337
adenoviridae	Gerbillus dunni	Rodentia	Muridae	FALSE	0	0.265418	0.438634	0.000577824	0.357439	8.60262e-17	0.826185	0.266283	0.000583607	0.358345	8.76811e-17	0.827874	0.0176092	0.016239	0.00756495	0.00924328	0.0272449
adenoviridae	Gerbillus famulus	Rodentia	Muridae	FALSE	0	0.264992	0.43956	2.49685e-05	0.351403	3.68285e-17	0.796368	0.265751	2.53448e-05	0.35219	3.72551e-17	0.797563	0.0141523	0.0131381	0.00599131	0.007562	0.021986
adenoviridae	Gerbillus floweri	Rodentia	Muridae	FALSE	0	0.472345	0.499433	0.696925	0.411086	2.64426e-13	0.915557	0.473242	0.699756	0.411731	2.66974e-13	0.916467	0.0138478	0.0129237	0.00587006	0.00747085	0.0215381
adenoviridae	Gerbillus gerbillus	Rodentia	Muridae	FALSE	0	0.601511	0.489631	0.801462	0.384063	6.90179e-07	0.961794	0.605456	0.806317	0.385008	7.32021e-07	0.963381	0.0448848	0.0408553	0.0186952	0.0255797	0.0688502
adenoviridae	Gerbillus gleadowi	Rodentia	Muridae	FALSE	0	0.591453	0.490101	0.837271	0.429382	5.23313e-10	0.985034	0.592227	0.838698	0.429624	5.31107e-10	0.985226	0.0159848	0.0148038	0.00678713	0.00844739	0.0248261
adenoviridae	Gerbillus grobbeni	Rodentia	Muridae	FALSE	0	0.262365	0.444682	0.000221454	0.374944	4.32996e-19	0.868632	0.262932	0.000225063	0.375491	4.38186e-19	0.869429	0.0133583	0.0124896	0.00568315	0.00725604	0.0206956
adenoviridae	Gerbillus harwoodi	Rodentia	Muridae	FALSE	0	0.596164	0.489672	0.777016	0.364438	7.36951e-08	0.932449	0.597776	0.780731	0.365023	7.59227e-08	0.933167	0.0185956	0.0172144	0.00806092	0.00969956	0.0287891
adenoviridae	Gerbillus henleyi	Rodentia	Muridae	FALSE	0	0.149789	0.360853	1.16962e-08	0.30225	1.8627e-26	0.782095	0.15037	1.19106e-08	0.303218	1.89078e-26	0.785179	0.0222424	0.0204195	0.00999405	0.0112905	0.0351931
adenoviridae	Gerbillus hesperinus	Rodentia	Muridae	FALSE	0	0.536459	0.498622	0.74476	0.392313	1.13823e-11	0.916501	0.53745	0.746499	0.392823	1.15598e-11	0.916965	0.0133579	0.0124894	0.005683	0.00725581	0.0206951
adenoviridae	Gerbillus hoogstraali	Rodentia	Muridae	FALSE	0	0.42691	0.492636	0.609528	0.381632	6.39259e-10	0.891317	0.427911	0.610575	0.382276	6.4566e-10	0.892603	0.0134199	0.0125305	0.00570612	0.00728686	0.0207695
adenoviridae	Gerbillus jamesi	Rodentia	Muridae	FALSE	0	0.335644	0.472547	0.0239679	0.37645	2.38886e-13	0.849324	0.336522	0.02423	0.377212	2.41391e-13	0.850629	0.0133594	0.0124902	0.00568357	0.00725666	0.020697
adenoviridae	Gerbillus juliani	Rodentia	Muridae	FALSE	0	0.083782	0.276486	4.36354e-14	0.226369	2.06624e-38	0.500424	0.0841044	4.41377e-14	0.22715	2.1326e-38	0.503564	0.0140597	0.0130901	0.00595404	0.00751914	0.0218469
adenoviridae	Gerbillus latastei	Rodentia	Muridae	FALSE	0	0.292434	0.452267	0.000274835	0.394067	2.12882e-17	0.89865	0.293	0.000277518	0.394659	2.16231e-17	0.899637	0.0146005	0.0135676	0.00617602	0.0078196	0.0226168
adenoviridae	Gerbillus lowei	Rodentia	Muridae	FALSE	0	0.288479	0.44831	0.000481298	0.371366	5.65122e-19	0.8357	0.28917	0.000489105	0.372126	5.70385e-19	0.836794	0.0133585	0.0124897	0.00568324	0.00725616	0.0206959
adenoviridae	Gerbillus maghrebi	Rodentia	Muridae	FALSE	0	0.410969	0.492461	0.629187	0.362276	3.73992e-09	0.830438	0.412204	0.632289	0.363115	3.80251e-09	0.83198	0.014127	0.0131242	0.00598109	0.00754138	0.0219448
adenoviridae	Gerbillus mesopotamiae	Rodentia	Muridae	FALSE	0	0.325354	0.468487	0.00648613	0.406947	2.06126e-12	0.947782	0.325938	0.00655054	0.407412	2.08737e-12	0.948332	0.0139596	0.0130123	0.00591417	0.00749995	0.0216969
adenoviridae	Gerbillus muriculus	Rodentia	Muridae	FALSE	0	0.334014	0.472304	3.909e-06	0.381999	6.1048e-22	0.838874	0.33483	4.0066e-06	0.382769	6.14159e-22	0.840128	0.0133479	0.0124839	0.00567931	0.00724888	0.0206825
adenoviridae	Gerbillus nancillus	Rodentia	Muridae	FALSE	0	0.294404	0.456267	4.28193e-05	0.370778	1.7027e-15	0.816035	0.295297	4.31319e-05	0.371759	1.72844e-15	0.817509	0.0170261	0.0158189	0.00727946	0.00893851	0.0263844
adenoviridae	Gerbillus nanus	Rodentia	Muridae	FALSE	0	0.471097	0.499	0.682003	0.402247	2.40504e-09	0.88819	0.472913	0.686438	0.403381	2.4866e-09	0.890293	0.0272276	0.0249113	0.012768	0.0134007	0.0434516
adenoviridae	Gerbillus nigeriae	Rodentia	Muridae	FALSE	0	0.090194	0.288602	6.40684e-15	0.236684	0	0.461529	0.0904805	6.48522e-15	0.237262	0	0.465205	0.0134068	0.0125211	0.0057012	0.00728046	0.0207559
adenoviridae	Gerbillus occiduus	Rodentia	Muridae	FALSE	0	0.184794	0.390952	2.16251e-08	0.317234	2.99809e-32	0.778084	0.185282	2.18288e-08	0.317876	3.05127e-32	0.780298	0.0134626	0.0125714	0.0057221	0.00730779	0.0208583
adenoviridae	Gerbillus percivali	Rodentia	Muridae	FALSE	0	0.44241	0.495718	0.599729	0.420658	6.44929e-10	0.909564	0.44314	0.603392	0.421109	6.51977e-10	0.910285	0.0133478	0.0124838	0.00567924	0.00724874	0.0206822
adenoviridae	Gerbillus perpallidus	Rodentia	Muridae	FALSE	0	0.461173	0.498849	0.657085	0.410226	6.09077e-12	0.945698	0.462017	0.659961	0.410709	6.13656e-12	0.946465	0.0134709	0.0125794	0.00572526	0.00731203	0.0208808
adenoviridae	Gerbillus poecilops	Rodentia	Muridae	FALSE	0	0.172125	0.377554	5.6788e-09	0.308763	2.17891e-21	0.749412	0.172636	5.7968e-09	0.309419	2.20695e-21	0.751175	0.0143559	0.0133157	0.00607431	0.00770687	0.0222658
adenoviridae	Gerbillus principulus	Rodentia	Muridae	FALSE	0	0.353098	0.478845	0.00534753	0.391317	2.73475e-19	0.857368	0.353904	0.00541663	0.392089	2.75241e-19	0.85896	0.0133508	0.0124855	0.00568038	0.00725118	0.0206861
adenoviridae	Gerbillus pulvinatus	Rodentia	Muridae	FALSE	0	0.548857	0.49674	0.77285	0.400719	4.33017e-08	0.934524	0.549776	0.774025	0.401189	4.36438e-08	0.935493	0.0137847	0.0128783	0.0058454	0.0074275	0.0214489
adenoviridae	Gerbillus pusillus	Rodentia	Muridae	FALSE	0	0.113327	0.311765	6.64973e-10	0.273691	2.97189e-29	0.754906	0.113641	6.80402e-10	0.274352	3.10913e-29	0.758577	0.018629	0.0172525	0.008078	0.00971994	0.0288406
adenoviridae	Gerbillus pyramidum	Rodentia	Muridae	FALSE	0	0.565838	0.495835	0.744824	0.407916	1.45971e-11	0.967607	0.568456	0.751237	0.409039	1.49781e-11	0.968102	0.0355051	0.0318747	0.0150146	0.0207379	0.054471
adenoviridae	Gerbillus rosalinda	Rodentia	Muridae	FALSE	0	0.474624	0.499176	0.6962	0.391982	2.05325e-10	0.88944	0.475634	0.698203	0.392645	2.10537e-10	0.890687	0.0138874	0.0129524	0.00588565	0.00748648	0.0215941
adenoviridae	Gerbillus rupicola	Rodentia	Muridae	FALSE	0	0.243717	0.435861	3.33096e-06	0.353245	4.17355e-19	0.79493	0.244354	3.36194e-06	0.354026	4.23094e-19	0.796592	0.0137858	0.0128788	0.00584583	0.00742824	0.0214504
adenoviridae	Gerbillus simoni	Rodentia	Muridae	FALSE	0	0.276145	0.444939	0.000756043	0.375396	1.95279e-14	0.837072	0.276854	0.000765919	0.376167	1.97372e-14	0.838777	0.0154624	0.0143107	0.00654997	0.00821939	0.0240053
adenoviridae	Gerbillus somalicus	Rodentia	Muridae	FALSE	0	0.147875	0.354006	8.14473e-09	0.295854	1.21345e-25	0.743483	0.148265	8.1993e-09	0.296488	1.22858e-25	0.745934	0.014389	0.0133509	0.00608793	0.00772274	0.0223191
adenoviridae	Gerbillus stigmonyx	Rodentia	Muridae	FALSE	0	0.285813	0.452503	0.000383808	0.37113	4.16935e-14	0.83007	0.286476	0.000388207	0.371886	4.24748e-14	0.83163	0.0135311	0.0126395	0.00574797	0.00734247	0.0209879
adenoviridae	Gerbillus tarabuli	Rodentia	Muridae	FALSE	0	0.557133	0.496566	0.788153	0.414727	1.10102e-11	0.969248	0.558454	0.79139	0.415278	1.13718e-11	0.969589	0.0221728	0.0203765	0.00995613	0.0112625	0.0350716
adenoviridae	Gerbillus watersi	Rodentia	Muridae	FALSE	0	0.18193	0.387403	3.77239e-06	0.33033	1.46676e-23	0.796789	0.182377	3.81504e-06	0.331051	1.48196e-23	0.799099	0.0141664	0.0131538	0.005997	0.00757346	0.0220213
adenoviridae	Giraffa camelopardalis	Cetartiodactyla	Giraffidae	FALSE	0	0.885655	0.31214	0.980788	0.191265	0.710328	0.999999	0.978719	0.992593	0.0307605	0.935135	1	0.656817	0.72678	0.273875	0.229313	0.960985
adenoviridae	Glaucomys sabrinus	Rodentia	Sciuridae	FALSE	0	0.516842	0.499672	0.702751	0.428392	8.78134e-13	0.98416	0.517356	0.7055	0.428689	8.89211e-13	0.98434	0.00913046	0.0069557	0.00822343	0.001487	0.0197958
adenoviridae	Glaucomys volans	Rodentia	Sciuridae	FALSE	0	0.875113	0.330605	0.965256	0.245029	0.780333	0.999952	0.878797	0.970409	0.244301	0.788793	0.999954	0.0632825	0.0514967	0.0414906	0.0257453	0.119912
adenoviridae	Glauconycteris alboguttata	Chiroptera	Vespertilionidae	FALSE	0	0.755313	0.429433	0.841384	0.269326	0.322633	0.954213	0.7563	0.842122	0.269401	0.323673	0.954487	0.0082696	0.00735491	0.005056	0.00297967	0.0147513
adenoviridae	Glauconycteris argentata	Chiroptera	Vespertilionidae	FALSE	0	0.85041	0.356581	0.879002	0.166803	0.751503	0.974632	0.86115	0.891852	0.164416	0.77734	0.977375	0.101818	0.0993557	0.0243726	0.0733821	0.133411
adenoviridae	Glauconycteris beatrix	Chiroptera	Vespertilionidae	FALSE	0	0.7271	0.44895	0.869753	0.322853	0.0102344	0.990903	0.728502	0.872435	0.322756	0.0103514	0.99098	0.0139392	0.0124189	0.00852487	0.0048632	0.0241882
adenoviridae	Glauconycteris curryae	Chiroptera	Vespertilionidae	FALSE	0	0.569687	0.494976	0.743578	0.369678	0.000386273	0.923661	0.570613	0.745042	0.369921	0.000388006	0.924141	0.00824649	0.00733859	0.00504285	0.00297392	0.0147226
adenoviridae	Glauconycteris egeria	Chiroptera	Vespertilionidae	FALSE	0	0.790123	0.407237	0.865956	0.221406	0.625133	0.961758	0.79121	0.867434	0.221293	0.627536	0.962267	0.00881985	0.00785829	0.00537313	0.00316226	0.0155782
adenoviridae	Glauconycteris gleni	Chiroptera	Vespertilionidae	FALSE	0	0.819337	0.390552	0.861915	0.210851	0.754655	0.965626	0.819939	0.862568	0.210879	0.755634	0.96583	0.0057225	0.00493603	0.00372681	0.00196422	0.0108548
adenoviridae	Glauconycteris humeralis	Chiroptera	Vespertilionidae	FALSE	0	0.831419	0.369548	0.861601	0.164221	0.723661	0.966116	0.832693	0.864577	0.163983	0.724892	0.966807	0.0107846	0.00954259	0.0065514	0.00383079	0.0188656
adenoviridae	Glauconycteris kenyacola	Chiroptera	Vespertilionidae	FALSE	0	0.444698	0.497278	0.53576	0.399703	1.3912e-09	0.935961	0.445164	0.537487	0.399965	1.40143e-09	0.936204	0.00575927	0.00497305	0.00374361	0.00198856	0.0108996
adenoviridae	Glauconycteris machadoi	Chiroptera	Vespertilionidae	FALSE	0	0.281734	0.4517	0.000258087	0.376203	5.29001e-22	0.860111	0.282101	0.000258784	0.376589	5.30779e-22	0.86081	0.00571809	0.00493117	0.00372479	0.0019613	0.0108496
adenoviridae	Glauconycteris poensis	Chiroptera	Vespertilionidae	FALSE	0	0.825664	0.383185	0.877361	0.210799	0.694874	0.989345	0.835001	0.885397	0.208526	0.711572	0.990321	0.0876313	0.0855931	0.0208663	0.0636605	0.114973
adenoviridae	Glauconycteris superba	Chiroptera	Vespertilionidae	FALSE	0	0.735024	0.440209	0.848836	0.303466	0.00989971	0.968864	0.735643	0.849749	0.303526	0.0100333	0.969016	0.00572576	0.00493963	0.00372829	0.00196638	0.0108583
adenoviridae	Glauconycteris variegata	Chiroptera	Vespertilionidae	FALSE	0	0.529798	0.49926	0.736302	0.384317	3.34286e-08	0.936824	0.551349	0.785562	0.392773	4.47539e-08	0.949347	0.203324	0.198678	0.0417617	0.152947	0.257433
adenoviridae	Glironia venusta	Didelphimorphia	Didelphidae	FALSE	0	0.151687	0.365209	1.25829e-14	0.345437	0	0.921029	0.151747	1.29412e-14	0.345546	0	0.921746	0.010646	0.00606991	0.0143563	0.000894466	0.0251657
adenoviridae	Glirulus japonicus	Rodentia	Gliridae	FALSE	0	0.784947	0.416391	0.893656	0.301546	0.000454586	0.989488	0.787675	0.894992	0.301964	0.000467724	0.989616	0.0320315	0.0259598	0.022436	0.0112499	0.0605759
adenoviridae	Glis glis	Rodentia	Gliridae	FALSE	0	0.962589	0.187531	0.985863	0.048123	0.894801	0.999947	0.97413	0.989487	0.0333123	0.923923	0.99996	0.308009	0.290877	0.148559	0.127885	0.521333
adenoviridae	Glischropus bucephalus	Chiroptera	Vespertilionidae	FALSE	0	0.78565	0.409006	0.86048	0.260248	0.556003	0.995801	0.786994	0.864281	0.260006	0.559469	0.995836	0.0127293	0.0113003	0.00776062	0.00444818	0.02223
adenoviridae	Glischropus javanus	Chiroptera	Vespertilionidae	FALSE	0	0.464432	0.498863	0.47395	0.404793	5.47861e-08	0.930264	0.464948	0.474957	0.405041	5.50728e-08	0.930856	0.00576982	0.00498519	0.00374845	0.00199554	0.0109334
adenoviridae	Glischropus tylopus	Chiroptera	Vespertilionidae	FALSE	0	0.434709	0.494976	0.293247	0.437117	1.10312e-11	0.984658	0.435474	0.295699	0.437556	1.12723e-11	0.984929	0.0149053	0.013164	0.00913911	0.00516019	0.02601
adenoviridae	Glossophaga commissarisi	Chiroptera	Phyllostomidae	FALSE	0	0.618892	0.485925	0.839805	0.406918	6.27405e-08	0.97827	0.635226	0.870067	0.412121	8.72784e-08	0.982361	0.224002	0.220073	0.0596214	0.150875	0.304625
adenoviridae	Glossophaga leachii	Chiroptera	Phyllostomidae	FALSE	0	0.644641	0.478725	0.814253	0.368621	1.16919e-05	0.961902	0.644867	0.814335	0.368702	1.18037e-05	0.961984	0.00351956	0.00263279	0.00310485	0.000570113	0.00782049
adenoviridae	Glossophaga longirostris	Chiroptera	Phyllostomidae	FALSE	0	0.672426	0.471675	0.861197	0.396208	2.19598e-06	0.983663	0.675567	0.869392	0.397627	2.32807e-06	0.98429	0.0524997	0.0503888	0.0176356	0.0314711	0.0756331
adenoviridae	Glossophaga morenoi	Chiroptera	Phyllostomidae	FALSE	0	0.618771	0.486453	0.782558	0.363736	2.18228e-05	0.924268	0.622768	0.788546	0.36516	2.2756e-05	0.926236	0.0420271	0.0404022	0.0152764	0.0242601	0.0628219
adenoviridae	Glossophaga soricina	Chiroptera	Phyllostomidae	TRUE	1	1	0	1	0	1	1	0.934167	0.94788	0.0571054	0.842928	0.997551	0.749443	0.767249	0.108896	0.597647	0.875304
adenoviridae	Glyphonycteris behnii	Chiroptera	Phyllostomidae	FALSE	0	0.625211	0.485138	0.835596	0.386884	6.5844e-06	0.953782	0.625374	0.835786	0.386958	6.5907e-06	0.953849	0.00309286	0.00231909	0.00274872	0.000505558	0.00679307
adenoviridae	Glyphonycteris daviesi	Chiroptera	Phyllostomidae	FALSE	0	0.518817	0.499877	0.777691	0.42105	2.29661e-08	0.950958	0.51903	0.778516	0.421192	2.31084e-08	0.951209	0.00537597	0.00409361	0.00472749	0.000876516	0.011787
adenoviridae	Glyphonycteris sylvestris	Chiroptera	Phyllostomidae	FALSE	0	0.392001	0.490402	0.00137593	0.433026	2.09062e-19	0.933964	0.392153	0.00138025	0.433176	2.12004e-19	0.934556	0.00554174	0.004231	0.00487536	0.000902225	0.0121992
adenoviridae	Glyphotes simus	Rodentia	Sciuridae	FALSE	0	9.41661e-07	0	0	8.05441e-06	0	1.99817e-14	9.56073e-07	0	8.17823e-06	0	2.00609e-14	0.00414551	0.00322969	0.00374219	0.000699804	0.00887108
adenoviridae	Golunda ellioti	Rodentia	Muridae	FALSE	0	0.535744	0.498962	0.8172	0.447659	6.16317e-10	0.984539	0.538501	0.824608	0.44879	6.88911e-10	0.985189	0.0633302	0.0575408	0.0266293	0.035166	0.099062
adenoviridae	Gorilla beringei	Primates	Hominidae	TRUE	1	1	0	1	0	1	1	0.999428	0.99999	0.00177846	0.998506	1	0.762361	0.789582	0.126115	0.590455	0.899983
adenoviridae	Gorilla gorilla	Primates	Hominidae	TRUE	1	1	0	1	0	1	1	0.997214	0.999985	0.0116934	0.99556	1	0.8907	0.919911	0.0973599	0.756955	0.982583
adenoviridae	Gracilinanus aceramarcae	Didelphimorphia	Didelphidae	FALSE	0	5.78672e-10	0	0	4.86101e-09	0	1.29667e-17	5.83155e-10	0	4.89891e-09	0	1.29724e-17	0.00525027	0.00306972	0.00704835	0.000466523	0.012154
adenoviridae	Gracilinanus agilis	Didelphimorphia	Didelphidae	FALSE	0	0.0607266	0.238963	2.50782e-21	0.222146	0	0.000250266	0.0607951	2.51859e-21	0.222236	0	0.000256486	0.0112211	0.00636464	0.0151439	0.000941497	0.026802
adenoviridae	Gracilinanus dryas	Didelphimorphia	Didelphidae	FALSE	0	5.23163e-05	0	1.05476e-33	0.000426653	0	6.18902e-09	5.24825e-05	1.05532e-33	0.000427739	0	6.22419e-09	0.00529885	0.00308762	0.00711064	0.000469527	0.012294
adenoviridae	Gracilinanus emiliae	Didelphimorphia	Didelphidae	FALSE	0	9.56729e-05	0	4.26134e-37	0.000595087	0	1.04138e-09	9.68237e-05	4.26379e-37	0.000603309	0	1.04232e-09	0.00561727	0.00324435	0.00752273	0.000509186	0.0129251
adenoviridae	Gracilinanus marica	Didelphimorphia	Didelphidae	FALSE	0	0.000207406	0.0173179	2.46659e-34	0.00177676	0	2.45818e-09	0.000208022	2.47202e-34	0.00178196	0	2.46037e-09	0.00659237	0.00377863	0.00881515	0.000580294	0.0151139
adenoviridae	Gracilinanus microtarsus	Didelphimorphia	Didelphidae	FALSE	0	0.294498	0.455908	0.00071702	0.390518	5.73691e-14	0.880422	0.295396	0.000731797	0.391581	5.7786e-14	0.883432	0.0190781	0.00877066	0.0330974	0.00147893	0.0481599
adenoviridae	Grammomys aridulus	Rodentia	Muridae	FALSE	0	0.2883	0.452878	7.20972e-05	0.380087	1.19728e-20	0.849736	0.288941	7.30172e-05	0.380814	1.20435e-20	0.850806	0.0134357	0.0125456	0.00571202	0.00729451	0.0207861
adenoviridae	Grammomys buntingi	Rodentia	Muridae	FALSE	0	0.556996	0.495545	0.78508	0.413886	2.83278e-07	0.968169	0.558157	0.787589	0.414291	2.89443e-07	0.968553	0.0192458	0.0177834	0.00839555	0.0100475	0.0301047
adenoviridae	Grammomys caniceps	Rodentia	Muridae	FALSE	0	0.338476	0.472754	0.0104419	0.374169	9.94525e-14	0.852507	0.339401	0.01051	0.375009	1.01111e-13	0.853778	0.0141625	0.0131484	0.00599541	0.00757025	0.0220114
adenoviridae	Grammomys cometes	Rodentia	Muridae	FALSE	0	0.54901	0.497443	0.766958	0.384956	7.36212e-07	0.921433	0.550517	0.769265	0.385626	7.46009e-07	0.922424	0.0193955	0.0179271	0.00847329	0.0101094	0.0304264
adenoviridae	Grammomys dolichurus	Rodentia	Muridae	FALSE	0	0.653123	0.476208	0.786377	0.335085	0.000329765	0.923123	0.656305	0.791212	0.335664	0.000341641	0.925744	0.0325972	0.0293409	0.015814	0.0156498	0.0528188
adenoviridae	Grammomys dryas	Rodentia	Muridae	FALSE	0	0.781475	0.415858	0.857505	0.250689	0.461378	0.955004	0.782964	0.859056	0.250697	0.465288	0.955499	0.0161414	0.0149319	0.00685959	0.00852128	0.0250403
adenoviridae	Grammomys gigas	Rodentia	Muridae	FALSE	0	0.37835	0.487817	0.105102	0.397728	2.41845e-11	0.856762	0.379185	0.106012	0.398431	2.44131e-11	0.85818	0.0136383	0.0127411	0.00578885	0.00737199	0.0212045
adenoviridae	Grammomys ibeanus	Rodentia	Muridae	FALSE	0	0.492138	0.499798	0.714078	0.391245	3.16164e-09	0.87935	0.49351	0.71743	0.392117	3.2337e-09	0.880515	0.0176563	0.0162867	0.00758827	0.0092619	0.0273051
adenoviridae	Grammomys kuru	Rodentia	Muridae	FALSE	0	0.635033	0.482912	0.871805	0.402605	5.15411e-18	0.96551	0.636913	0.873632	0.403302	5.42715e-18	0.966359	0.0347591	0.0312052	0.0170437	0.0165045	0.0565051
adenoviridae	Grammomys macmillani	Rodentia	Muridae	FALSE	0	0.524832	0.499542	0.768187	0.398462	3.06401e-07	0.90357	0.527165	0.773053	0.399716	3.25423e-07	0.905204	0.0290944	0.0260915	0.0128872	0.0164859	0.0449552
adenoviridae	Grammomys minnae	Rodentia	Muridae	FALSE	0	0.196404	0.396969	2.7776e-06	0.322514	2.28964e-17	0.786963	0.196917	2.82354e-06	0.323182	2.31141e-17	0.788961	0.0135281	0.0126363	0.00574682	0.00734094	0.0209845
adenoviridae	Graomys chacoensis	Rodentia	Cricetidae	FALSE	0	0.363628	0.480722	0.0363101	0.401752	1.00042e-13	0.92577	0.36406	0.0368134	0.402076	1.00247e-13	0.926055	0.00567872	0.00391981	0.00549145	0.000815595	0.0123617
adenoviridae	Graomys domorum	Rodentia	Cricetidae	FALSE	0	0.389208	0.485949	0.0602642	0.415414	1.22205e-15	0.943669	0.3895	0.0607247	0.41562	1.22644e-15	0.943888	0.00393262	0.00279164	0.00381953	0.000573393	0.00859541
adenoviridae	Graomys edithae	Rodentia	Cricetidae	FALSE	0	0.0234434	0.154903	5.29368e-24	0.124903	0	3.57021e-06	0.0234779	5.30169e-24	0.12504	0	3.57798e-06	0.00365317	0.00259971	0.00357302	0.000535435	0.0080631
adenoviridae	Graomys griseoflavus	Rodentia	Cricetidae	FALSE	0	0.331504	0.470824	0.00117436	0.398134	5.16246e-14	0.911008	0.332932	0.00119244	0.399441	5.24695e-14	0.911808	0.023399	0.0183098	0.0173836	0.00836503	0.0444377
adenoviridae	Graphiurus angolensis	Rodentia	Gliridae	FALSE	0	0.569041	0.494745	0.81088	0.418402	2.3645e-18	0.990135	0.569617	0.811351	0.418688	2.38313e-18	0.990186	0.0077883	0.0056513	0.00767825	0.000986115	0.016904
adenoviridae	Graphiurus christyi	Rodentia	Gliridae	FALSE	0	0.214129	0.409778	2.14423e-08	0.364339	8.92608e-36	0.866018	0.214552	2.16546e-08	0.364909	9.17914e-36	0.866927	0.0132019	0.00946944	0.0128374	0.0017031	0.027673
adenoviridae	Graphiurus crassicaudatus	Rodentia	Gliridae	FALSE	0	0.122962	0.329696	9.96901e-14	0.297069	0	0.734027	0.123173	1.00673e-13	0.297403	0	0.736767	0.013718	0.0097862	0.0133464	0.00174657	0.0289864
adenoviridae	Graphiurus johnstoni	Rodentia	Gliridae	FALSE	0	0.775241	0.420125	0.874762	0.290414	0.118711	0.978639	0.775872	0.875817	0.290478	0.119294	0.978792	0.0072665	0.00520773	0.00722148	0.000927	0.0158788
adenoviridae	Graphiurus kelleni	Rodentia	Gliridae	FALSE	0	0.756661	0.430737	0.909662	0.350473	0.000312821	0.999602	0.760681	0.910508	0.350844	0.000355102	0.999632	0.0596149	0.0492085	0.0411803	0.0213388	0.114645
adenoviridae	Graphiurus lorraineus	Rodentia	Gliridae	FALSE	0	0.634796	0.480779	0.858174	0.412629	2.703e-07	0.998839	0.637373	0.868492	0.413634	3.01945e-07	0.998896	0.0443489	0.0361203	0.0304632	0.0156224	0.0850898
adenoviridae	Graphiurus microtis	Rodentia	Gliridae	FALSE	0	0.816651	0.389429	0.879898	0.234891	0.703321	0.980859	0.820782	0.882371	0.23476	0.715099	0.981792	0.0381245	0.0307939	0.0263989	0.0134266	0.0735503
adenoviridae	Graphiurus monardi	Rodentia	Gliridae	FALSE	0	0.414192	0.491668	0.00315433	0.432613	4.70248e-18	0.955969	0.414637	0.00319425	0.432948	4.7572e-18	0.95615	0.00735046	0.00529483	0.00729406	0.000933024	0.0161174
adenoviridae	Graphiurus murinus	Rodentia	Gliridae	FALSE	0	0.833187	0.377032	0.894374	0.232291	0.760319	0.979605	0.838938	0.89779	0.232538	0.78277	0.980232	0.0555844	0.0456469	0.0387873	0.0197726	0.107933
adenoviridae	Graphiurus nagtglasii	Rodentia	Gliridae	FALSE	0	0.146831	0.355001	8.34917e-10	0.322101	0	0.82676	0.14707	8.45038e-10	0.322501	0	0.828155	0.0149787	0.0107287	0.0145934	0.00189715	0.0318973
adenoviridae	Graphiurus ocularis	Rodentia	Gliridae	FALSE	0	0.734258	0.444115	0.91825	0.362579	2.35541e-05	0.997119	0.735841	0.919622	0.362796	2.38419e-05	0.997163	0.0262285	0.0212131	0.0187469	0.00896813	0.0499698
adenoviridae	Graphiurus platyops	Rodentia	Gliridae	FALSE	0	0.761556	0.425859	0.887676	0.340437	6.91916e-06	0.99815	0.763012	0.889157	0.340847	7.05826e-06	0.998176	0.0222978	0.0179693	0.0163608	0.00749282	0.0435937
adenoviridae	Graphiurus rupicola	Rodentia	Gliridae	FALSE	0	0.554349	0.497204	0.848042	0.438408	5.25582e-13	0.987083	0.554697	0.84898	0.438612	5.28501e-13	0.987093	0.00755925	0.00545026	0.00747611	0.00095345	0.0166296
adenoviridae	Graphiurus surdus	Rodentia	Gliridae	FALSE	0	0.314812	0.465189	0.000204639	0.418218	3.49391e-18	0.96299	0.315113	0.000205698	0.418442	3.5732e-18	0.963169	0.00871282	0.00621377	0.00851568	0.00109663	0.018969
adenoviridae	Gulo gulo	Carnivora	Mustelidae	FALSE	0	0.886006	0.318539	0.93947	0.127217	0.710814	0.999926	0.95221	0.972795	0.0559638	0.858634	0.999964	0.61146	0.618884	0.154299	0.397436	0.807944
adenoviridae	Gyldenstolpia fronto	Rodentia	Cricetidae	FALSE	0	0.169243	0.380479	5.80174e-07	0.310063	4.35533e-18	0.768117	0.169382	5.81061e-07	0.310274	4.39302e-18	0.768427	0.0037405	0.00267118	0.0036491	0.000547569	0.00822549
adenoviridae	Gymnobelideus leadbeateri	Diprotodontia	Petauridae	FALSE	0	0.273575	0.441227	2.07963e-11	0.414483	0	0.994662	0.273699	2.09841e-11	0.414604	0	0.994706	0.00663745	0.0033098	0.00954802	0.00044895	0.01593
adenoviridae	Gymnuromys roberti	Rodentia	Nesomyidae	FALSE	0	0.0970972	0.290852	3.18535e-17	0.273482	0	0.504509	0.0972118	3.20542e-17	0.273751	0	0.505525	0.0117356	0.0086909	0.0104089	0.00217692	0.0256094
adenoviridae	Habromys chinanteco	Rodentia	Cricetidae	FALSE	0	0.21672	0.407948	9.21771e-06	0.338222	1.29685e-14	0.796765	0.216913	9.25544e-06	0.338445	1.30005e-14	0.797365	0.00359513	0.00256191	0.00352297	0.000524479	0.0079617
adenoviridae	Habromys delicatulus	Rodentia	Cricetidae	FALSE	0	0.262352	0.43858	0.000521229	0.345727	1.56022e-14	0.76987	0.262565	0.000525467	0.345943	1.56431e-14	0.77073	0.0035993	0.00256463	0.00352656	0.000525096	0.0079658
adenoviridae	Habromys ixtlani	Rodentia	Cricetidae	FALSE	0	0.163836	0.36973	2.05847e-07	0.312026	1.49547e-23	0.792476	0.163941	2.06149e-07	0.312176	1.50315e-23	0.792643	0.00359515	0.00256193	0.00352299	0.000524483	0.00796172
adenoviridae	Habromys lepturus	Rodentia	Cricetidae	FALSE	0	0.168017	0.369639	3.07194e-07	0.315833	3.98296e-22	0.773785	0.168126	3.08395e-07	0.315984	3.98459e-22	0.774024	0.00359519	0.00256195	0.00352303	0.000524489	0.00796176
adenoviridae	Habromys lophurus	Rodentia	Cricetidae	FALSE	0	0.168272	0.373511	1.34504e-07	0.315742	4.36305e-17	0.766969	0.168383	1.34702e-07	0.31592	4.37784e-17	0.76716	0.00376897	0.00268789	0.0036741	0.000551313	0.00828474
adenoviridae	Habromys schmidlyi	Rodentia	Cricetidae	FALSE	0	0.103596	0.299733	1.16315e-12	0.240617	5.96874e-24	0.588058	0.103664	1.16949e-12	0.240766	5.99255e-24	0.588119	0.003595	0.00256183	0.00352287	0.000524461	0.00796158
adenoviridae	Habromys simulatus	Rodentia	Cricetidae	FALSE	0	0.223281	0.417911	9.89275e-06	0.337513	2.54593e-17	0.772429	0.223463	9.93291e-06	0.337757	2.56719e-17	0.772767	0.00370866	0.00264569	0.00362125	0.000543384	0.00815924
adenoviridae	Hadromys humei	Rodentia	Muridae	FALSE	0	0.428939	0.494144	0.377597	0.425658	2.7569e-15	0.942508	0.429672	0.380603	0.426146	2.78137e-15	0.942961	0.0134346	0.0125446	0.00571162	0.00729399	0.0207847
adenoviridae	Hadromys yunnanensis	Rodentia	Muridae	FALSE	0	0.823314	0.378506	0.920052	0.262956	0.514643	0.986458	0.824216	0.920707	0.262826	0.516658	0.986557	0.01349	0.0125977	0.00573244	0.00732168	0.0209321
adenoviridae	Haeromys margarettae	Rodentia	Muridae	FALSE	0	0.078822	0.262421	1.07927e-11	0.247613	6.04885e-31	0.00477807	0.0789395	1.08517e-11	0.247929	6.13337e-31	0.00483507	0.0134047	0.0125197	0.00570043	0.00727947	0.0207536
adenoviridae	Haeromys minahassae	Rodentia	Muridae	FALSE	0	0.0615975	0.234121	2.38706e-22	0.210053	0	0.00491828	0.0617599	2.41332e-22	0.210562	0	0.00494714	0.0136896	0.0127999	0.00580856	0.0073821	0.0213145
adenoviridae	Haeromys pusillus	Rodentia	Muridae	FALSE	0	0.085913	0.283004	2.97076e-14	0.254662	5.98568e-36	0.312495	0.0860599	3.0118e-14	0.255026	6.06242e-36	0.313241	0.0146783	0.0136297	0.0062088	0.00788005	0.0227061
adenoviridae	Handleyomys alfaroi	Rodentia	Cricetidae	FALSE	0	0.222749	0.415055	9.8741e-06	0.349637	3.14273e-17	0.794215	0.223822	9.99938e-06	0.351118	3.18636e-17	0.796206	0.0221564	0.0172168	0.0165573	0.00790122	0.0417619
adenoviridae	Handleyomys chapmani	Rodentia	Cricetidae	FALSE	0	0.112679	0.32142	3.35784e-08	0.260493	1.31385e-19	0.660676	0.112766	3.37071e-08	0.260665	1.31599e-19	0.661869	0.00393046	0.0027903	0.00381759	0.00057319	0.00858898
adenoviridae	Handleyomys fuscatus	Rodentia	Cricetidae	FALSE	0	0.0696389	0.25582	1.30928e-11	0.209003	1.74931e-25	0.178623	0.0698277	1.3177e-11	0.2095	1.77788e-25	0.179197	0.0151195	0.011885	0.012161	0.00510205	0.0277147
adenoviridae	Handleyomys intectus	Rodentia	Cricetidae	FALSE	0	0.0627495	0.253964	2.50366e-16	0.195984	2.16797e-29	0.0658127	0.0627931	2.53531e-16	0.196093	2.16853e-29	0.0660268	0.00363015	0.00258472	0.00355312	0.000529649	0.00799606
adenoviridae	Handleyomys melanotis	Rodentia	Cricetidae	FALSE	0	0.140357	0.341403	1.93493e-09	0.280539	6.71549e-20	0.715724	0.140476	1.94791e-09	0.280753	6.72025e-20	0.716045	0.00422305	0.00296382	0.00408409	0.000611201	0.0091843
adenoviridae	Handleyomys rhabdops	Rodentia	Cricetidae	FALSE	0	0.152536	0.356777	2.34481e-07	0.300626	5.29478e-17	0.743533	0.152661	2.35446e-07	0.300816	5.3045e-17	0.744033	0.00362164	0.00257918	0.00354578	0.000528393	0.00798771
adenoviridae	Handleyomys rostratus	Rodentia	Cricetidae	FALSE	0	0.0864966	0.278286	4.23717e-11	0.227781	4.70686e-22	0.405827	0.0865983	4.28093e-11	0.227992	4.77143e-22	0.406721	0.00570574	0.00393982	0.00551843	0.000819803	0.012446
adenoviridae	Handleyomys saturatior	Rodentia	Cricetidae	FALSE	0	0.173639	0.37738	1.47412e-07	0.315173	1.5119e-17	0.751716	0.173816	1.47766e-07	0.315424	1.52469e-17	0.752346	0.00435333	0.00302838	0.00420508	0.000628233	0.00947259
adenoviridae	Hapalemur alaotrensis	Primates	Lemuridae	FALSE	0	0.751886	0.431091	0.993037	0.411457	3.89239e-05	1	0.753324	0.993318	0.411229	4.68456e-05	1	0.0716861	0.062182	0.0451929	0.0257521	0.131241
adenoviridae	Hapalemur aureus	Primates	Lemuridae	FALSE	0	0.877967	0.327401	0.893664	0.127537	0.786909	0.980468	0.892658	0.906655	0.122952	0.802901	0.983403	0.143477	0.135907	0.0503349	0.0875283	0.212735
adenoviridae	Hapalemur griseus	Primates	Lemuridae	TRUE	1	1	0	1	0	1	1	0.990838	0.999882	0.0274264	0.985064	1	0.107948	0.0948852	0.0646552	0.0397626	0.194403
adenoviridae	Hapalemur meridionalis	Primates	Lemuridae	FALSE	0	0.447897	0.49714	0.081303	0.462553	2.42397e-15	0.993218	0.450777	0.0912808	0.463534	2.61755e-15	0.993858	0.0790422	0.0690579	0.0489882	0.0283575	0.145792
adenoviridae	Hapalemur occidentalis	Primates	Lemuridae	FALSE	0	0.852647	0.354206	0.987809	0.304637	0.204018	0.999852	0.856891	0.988236	0.303415	0.225173	0.999868	0.0914058	0.0797437	0.0556355	0.033581	0.167412
adenoviridae	Hapalomys delacouri	Rodentia	Muridae	FALSE	0	0.746009	0.440101	0.856305	0.292403	0.18562	0.959396	0.747866	0.858167	0.292392	0.187515	0.95996	0.0204083	0.0187985	0.00900606	0.0105277	0.0321588
adenoviridae	Hapalomys longicaudatus	Rodentia	Muridae	FALSE	0	0.234212	0.425242	8.33222e-07	0.371638	7.2319e-25	0.924347	0.23463	8.46126e-07	0.372116	7.2988e-25	0.925244	0.0133765	0.0124998	0.00568992	0.00726454	0.0207187
adenoviridae	Haplonycteris fischeri	Chiroptera	Pteropodidae	FALSE	0	0.264953	0.445297	3.79818e-05	0.366001	5.3009e-22	0.858941	0.265153	3.80385e-05	0.366244	5.31532e-22	0.859875	0.00384483	0.00276456	0.00372499	0.000550982	0.0086605
adenoviridae	Harpiocephalus harpia	Chiroptera	Vespertilionidae	FALSE	0	0.830945	0.369639	0.885821	0.206239	0.638766	0.986077	0.832176	0.886348	0.2059	0.642623	0.986215	0.0119592	0.0106593	0.00727829	0.00420672	0.0209683
adenoviridae	Harpiola grisea	Chiroptera	Vespertilionidae	FALSE	0	0.480339	0.499687	0.660147	0.402802	1.64426e-08	0.910681	0.48084	0.662548	0.403105	1.65707e-08	0.911101	0.00572351	0.00493714	0.00372726	0.00196488	0.0108558
adenoviridae	Harpyionycteris celebensis	Chiroptera	Pteropodidae	FALSE	0	0.368603	0.482669	0.0655638	0.406485	4.57109e-11	0.914518	0.368864	0.0667788	0.406682	4.59748e-11	0.914762	0.0045371	0.00319488	0.00442653	0.000646311	0.0102044
adenoviridae	Harpyionycteris whiteheadi	Chiroptera	Pteropodidae	FALSE	0	0.366147	0.481987	0.0136271	0.408841	2.02974e-13	0.91432	0.366343	0.013692	0.409025	2.04897e-13	0.91453	0.00336278	0.00242768	0.00324913	0.000482412	0.00750613
adenoviridae	Heimyscus fumosus	Rodentia	Muridae	TRUE	1	1	0	1	0	1	1	0.960636	0.967379	0.0348546	0.90638	0.997379	0.0466697	0.0426777	0.0194384	0.0263813	0.0717963
adenoviridae	Helarctos malayanus	Carnivora	Ursidae	FALSE	0	0.883897	0.319384	0.943451	0.198269	0.750078	0.998129	0.899825	0.956481	0.194503	0.791641	0.998621	0.237451	0.228165	0.102467	0.116214	0.372635
adenoviridae	Heliophobius argenteocinereus	Rodentia	Bathyergidae	FALSE	0	0.116951	0.326823	7.91733e-22	0.301718	0	0.765082	0.117092	8.05248e-22	0.302034	0	0.766331	0.0158602	0.0110127	0.0163906	0.00244635	0.0348364
adenoviridae	Heliosciurus gambianus	Rodentia	Sciuridae	FALSE	0	0.939169	0.238226	0.961195	0.0939699	0.873868	0.999438	0.942322	0.966862	0.0916817	0.878902	0.99949	0.0638554	0.0519275	0.0418215	0.0259908	0.121015
adenoviridae	Heliosciurus mutabilis	Rodentia	Sciuridae	FALSE	0	0.911241	0.283876	0.961307	0.147801	0.831065	0.997787	0.911606	0.96146	0.147587	0.831519	0.99779	0.0064596	0.00496172	0.0057359	0.00108587	0.0139512
adenoviridae	Heliosciurus punctatus	Rodentia	Sciuridae	FALSE	0	0.442215	0.496531	0.342913	0.431549	2.98214e-20	0.977853	0.442604	0.343839	0.431727	3.00247e-20	0.978015	0.00652446	0.00500894	0.00579501	0.00109454	0.0141175
adenoviridae	Heliosciurus rufobrachium	Rodentia	Sciuridae	FALSE	0	0.838966	0.370276	0.986448	0.322885	0.0200708	0.999451	0.84034	0.986894	0.322803	0.0204621	0.999469	0.0385055	0.0314928	0.025056	0.0157109	0.0712009
adenoviridae	Heliosciurus ruwenzorii	Rodentia	Sciuridae	FALSE	0	0.882487	0.324259	0.970935	0.252241	0.809306	0.998097	0.883498	0.971997	0.252229	0.815944	0.99813	0.0249611	0.0205143	0.0166427	0.00992407	0.0446985
adenoviridae	Heliosciurus undulatus	Rodentia	Sciuridae	FALSE	0	0.91487	0.286897	0.947939	0.132715	0.818648	0.995875	0.916427	0.948814	0.13174	0.822555	0.995959	0.0212819	0.0174267	0.0144741	0.00833293	0.0383002
adenoviridae	Helogale hirtula	Carnivora	Herpestidae	FALSE	0	0.237382	0.427022	4.89559e-23	0.389378	0	0.912768	0.237672	4.93906e-23	0.389776	0	0.913229	0.0126841	0.00772002	0.0146335	0.00140278	0.0291008
adenoviridae	Helogale parvula	Carnivora	Herpestidae	FALSE	0	0.74591	0.438853	0.882973	0.349016	1.09635e-06	0.998776	0.747146	0.884792	0.349327	1.11109e-06	0.998796	0.0196629	0.0123304	0.0229161	0.00212066	0.0453553
adenoviridae	Hemibelideus lemuroides	Diprotodontia	Pseudocheiridae	FALSE	0	0.0226155	0.151485	2.88921e-31	0.138861	0	1.69616e-08	0.0226207	2.88959e-31	0.138886	0	1.71173e-08	0.00626971	0.00316043	0.00846143	0.000430427	0.0158155
adenoviridae	Hemicentetes nigriceps	Afrosoricida	Tenrecidae	FALSE	0	0.160094	0.370548	3.58162e-19	0.348672	0	0.933607	0.160275	3.59793e-19	0.349001	0	0.934598	0.00883193	0.00492142	0.0132817	0.000688899	0.0208028
adenoviridae	Hemicentetes semispinosus	Afrosoricida	Tenrecidae	FALSE	0	0.143353	0.356679	5.29476e-18	0.322386	0	0.839378	0.143697	5.33514e-18	0.322998	0	0.839515	0.0119615	0.00657517	0.018056	0.00092995	0.0287476
adenoviridae	Hemiechinus auritus	Eulipotyphla	Erinaceidae	FALSE	0	0.770824	0.418762	0.876103	0.29515	0.150109	0.9951	0.77261	0.877462	0.295244	0.151044	0.995324	0.0224143	0.0145619	0.0252145	0.00333566	0.0514388
adenoviridae	Hemiechinus collaris	Eulipotyphla	Erinaceidae	FALSE	0	0.365766	0.482207	0.000395995	0.437251	1.03723e-29	0.986259	0.366073	0.000398938	0.437478	1.03974e-29	0.986365	0.00816017	0.00476717	0.00981032	0.000777421	0.0188445
adenoviridae	Hemigalus derbyanus	Carnivora	Viverridae	FALSE	0	0.685798	0.464276	0.848738	0.360017	4.57211e-05	0.982957	0.687236	0.848883	0.359917	4.57818e-05	0.983064	0.0192121	0.0121131	0.0229281	0.00215542	0.0437268
adenoviridae	Hemitragus jemlahicus	Cetartiodactyla	Bovidae	FALSE	0	0.869342	0.332637	0.907322	0.161412	0.791625	0.987141	0.877475	0.910365	0.158827	0.800445	0.988283	0.0804937	0.0533149	0.0769613	0.014999	0.183119
adenoviridae	Herpailurus yagouaroundi	Carnivora	Felidae	FALSE	0	0.931447	0.244396	0.996778	0.16744	0.760464	1	0.967919	0.999101	0.119007	0.925451	1	0.523826	0.586638	0.285334	0.133209	0.864026
adenoviridae	Herpestes auropunctatus	Carnivora	Herpestidae	FALSE	0	0.8306	0.37431	0.857742	0.16327	0.725398	0.965276	0.843793	0.869704	0.162183	0.746424	0.968743	0.110243	0.0990658	0.0631234	0.0401013	0.197584
adenoviridae	Herpestes brachyurus	Carnivora	Herpestidae	FALSE	0	0.141979	0.354405	1.75682e-18	0.316703	0	0.771959	0.142156	1.77975e-18	0.317068	0	0.772806	0.0191545	0.0119834	0.0223221	0.00208259	0.0441177
adenoviridae	Herpestes edwardsii	Carnivora	Herpestidae	FALSE	0	0.69151	0.461124	0.851395	0.377609	0.00015053	0.998846	0.702127	0.875892	0.379126	0.00016965	0.999029	0.133787	0.120591	0.0754479	0.0493891	0.242343
adenoviridae	Herpestes flavescens	Carnivora	Herpestidae	FALSE	0	0.296863	0.455818	2.55844e-07	0.404632	2.23679e-31	0.932906	0.297192	2.57728e-07	0.404912	2.25115e-31	0.933081	0.00850544	0.00520677	0.00966964	0.000901195	0.019484
adenoviridae	Herpestes fuscus	Carnivora	Herpestidae	FALSE	0	0.108189	0.31214	2.02749e-24	0.279984	0	0.7582	0.108323	2.08725e-24	0.280304	0	0.759719	0.0134726	0.00825342	0.0155794	0.00147136	0.0309487
adenoviridae	Herpestes ichneumon	Carnivora	Herpestidae	TRUE	1	1	0	1	0	1	1	0.968399	0.989274	0.0416764	0.905133	0.999998	0.386712	0.387457	0.167797	0.16122	0.607127
adenoviridae	Herpestes javanicus	Carnivora	Herpestidae	FALSE	0	0.876844	0.324376	0.921245	0.112794	0.731086	0.996959	0.920026	0.938382	0.0706589	0.802458	0.998306	0.364275	0.362396	0.16302	0.148386	0.578775
adenoviridae	Herpestes naso	Carnivora	Herpestidae	FALSE	0	0.100647	0.302517	2.21698e-20	0.264764	0	0.60528	0.101049	2.23939e-20	0.26557	0	0.617941	0.0194001	0.0121547	0.0226092	0.00210097	0.0447154
adenoviridae	Herpestes ochraceus	Carnivora	Herpestidae	FALSE	0	0.204522	0.404139	5.18139e-19	0.370638	0	0.90465	0.204634	5.18288e-19	0.370799	0	0.904793	0.0101031	0.00607036	0.0115462	0.00109639	0.0230318
adenoviridae	Herpestes pulverulentus	Carnivora	Herpestidae	FALSE	0	0.668656	0.471428	0.912182	0.410466	3.28848e-12	0.999308	0.674357	0.916486	0.41063	3.65032e-12	0.999356	0.0936112	0.0854559	0.0540703	0.0336005	0.165415
adenoviridae	Herpestes sanguineus	Carnivora	Herpestidae	FALSE	0	0.606279	0.487295	0.830741	0.412252	1.34829e-09	0.996011	0.615929	0.847327	0.414211	1.51938e-09	0.996456	0.140945	0.126445	0.0790511	0.0520439	0.252694
adenoviridae	Herpestes semitorquatus	Carnivora	Herpestidae	FALSE	0	0.142379	0.354504	3.39517e-22	0.31787	0	0.770821	0.142547	3.43969e-22	0.318218	0	0.77177	0.0188555	0.0117786	0.0219718	0.0020542	0.0433736
adenoviridae	Herpestes smithii	Carnivora	Herpestidae	FALSE	0	0.553146	0.497247	0.751648	0.383312	1.02221e-07	0.945744	0.554787	0.759493	0.383843	1.05321e-07	0.946485	0.0187285	0.0116987	0.021823	0.00204035	0.0430575
adenoviridae	Herpestes urva	Carnivora	Herpestidae	FALSE	0	0.865818	0.339575	0.876238	0.0907705	0.755236	0.976559	0.875304	0.886101	0.0853566	0.769853	0.978236	0.0852257	0.0774424	0.049457	0.0300482	0.149548
adenoviridae	Herpestes vitticollis	Carnivora	Herpestidae	FALSE	0	0.14519	0.356973	4.03378e-14	0.291386	1.26643e-37	0.770258	0.145489	4.0886e-14	0.291914	1.27444e-37	0.771256	0.0160337	0.00995014	0.0186393	0.001739	0.0370473
adenoviridae	Hesperoptenus blanfordi	Chiroptera	Vespertilionidae	FALSE	0	0.644952	0.481346	0.75089	0.315764	0.000195707	0.924921	0.646419	0.752514	0.316038	0.000197207	0.925602	0.0108668	0.0096246	0.00660188	0.00385682	0.019003
adenoviridae	Hesperoptenus doriae	Chiroptera	Vespertilionidae	FALSE	0	0.455936	0.498051	0.629574	0.385037	3.22948e-08	0.916598	0.456508	0.630255	0.38537	3.24181e-08	0.917096	0.00587024	0.00510041	0.0037949	0.00204526	0.0110993
adenoviridae	Hesperoptenus gaskelli	Chiroptera	Vespertilionidae	FALSE	0	0.124688	0.326011	4.37518e-11	0.283442	5.92656e-37	0.744828	0.124876	4.41555e-11	0.283703	5.99677e-37	0.745971	0.00571745	0.00493047	0.0037245	0.00196088	0.0108489
adenoviridae	Hesperoptenus tickelli	Chiroptera	Vespertilionidae	FALSE	0	0.716493	0.447217	0.79031	0.29052	0.0585199	0.963643	0.717848	0.790649	0.290563	0.0590856	0.963992	0.011401	0.0101563	0.0069313	0.00404881	0.0199121
adenoviridae	Hesperoptenus tomesi	Chiroptera	Vespertilionidae	FALSE	0	0.453675	0.498025	0.56086	0.398401	9.34462e-10	0.912537	0.454244	0.561595	0.398767	9.41468e-10	0.913131	0.00653466	0.00573225	0.00411793	0.0023125	0.0119724
adenoviridae	Heterocephalus glaber	Rodentia	Bathyergidae	FALSE	0	0.294144	0.454682	2.82875e-05	0.425921	5.32677e-33	0.991891	0.294324	3.00862e-05	0.426086	5.43604e-33	0.991915	0.0146104	0.0102282	0.0150325	0.00225279	0.0318042
adenoviridae	Heterogeomys cherriei	Rodentia	Geomyidae	FALSE	0	0.0738921	0.254641	4.19619e-22	0.218606	0	0.233489	0.074042	4.20595e-22	0.219019	0	0.234315	0.0072664	0.00507145	0.007254	0.001072	0.0155527
adenoviridae	Heterogeomys dariensis	Rodentia	Geomyidae	FALSE	0	0.0327505	0.182254	2.5841e-38	0.157174	0	1.53452e-09	0.0327969	2.58761e-38	0.157384	0	1.5545e-09	0.00745324	0.00520388	0.00741045	0.00110378	0.0160995
adenoviridae	Heterogeomys lanius	Rodentia	Geomyidae	FALSE	0	0.0282715	0.170035	0	0.138616	0	1.41614e-06	0.0283124	0	0.138812	0	1.41781e-06	0.00710971	0.00493528	0.00712443	0.00104113	0.0150424
adenoviridae	Heterohyrax brucei	Hyracoidea	Procaviidae	FALSE	0	0.368196	0.483707	1.22192e-07	0.449928	0	0.991553	0.368982	1.22423e-07	0.45056	0	0.991702	0.0218081	0.0116702	0.029507	0.00164825	0.0515865
adenoviridae	Heteromys adspersus	Rodentia	Heteromyidae	FALSE	0	0.439882	0.495665	0.669423	0.402847	4.58503e-11	0.894744	0.441361	0.677955	0.404	4.65525e-11	0.896604	0.0174163	0.0143646	0.0125563	0.00608745	0.0327186
adenoviridae	Heteromys anomalus	Rodentia	Heteromyidae	FALSE	0	0.615364	0.487318	0.896219	0.448856	1.43239e-07	0.996906	0.617094	0.903145	0.449863	1.47488e-07	0.997047	0.0485807	0.040619	0.0331836	0.0176136	0.0914009
adenoviridae	Heteromys australis	Rodentia	Heteromyidae	FALSE	0	0.239482	0.425489	5.29305e-06	0.384816	1.17967e-22	0.892716	0.239802	5.31242e-06	0.385289	1.20808e-22	0.892822	0.00893279	0.0065184	0.00856939	0.0013814	0.0188396
adenoviridae	Heteromys desmarestianus	Rodentia	Heteromyidae	FALSE	0	0.371448	0.483179	0.00131478	0.440444	1.61569e-21	0.957492	0.371874	0.00133747	0.440869	1.61961e-21	0.958476	0.00992258	0.00715876	0.00955224	0.00146659	0.0210492
adenoviridae	Heteromys gaumeri	Rodentia	Heteromyidae	FALSE	0	0.35523	0.478422	0.0182594	0.387422	5.79845e-12	0.860234	0.35592	0.0187027	0.388019	5.84177e-12	0.860857	0.00765672	0.0056063	0.00733046	0.00119414	0.0160376
adenoviridae	Heteromys irroratus	Rodentia	Heteromyidae	FALSE	0	0.238775	0.425304	8.99834e-06	0.347756	3.39285e-20	0.793241	0.239159	9.15415e-06	0.348214	3.41135e-20	0.794009	0.00866553	0.00634535	0.00830674	0.00135685	0.0182134
adenoviridae	Heteromys nelsoni	Rodentia	Heteromyidae	FALSE	0	0.203687	0.400673	8.57423e-09	0.337625	1.29163e-20	0.819134	0.203956	8.75395e-09	0.337933	1.29608e-20	0.819414	0.00624832	0.00457334	0.00603074	0.000962815	0.0131673
adenoviridae	Heteromys oasicus	Rodentia	Heteromyidae	FALSE	0	0.310687	0.461124	4.69559e-05	0.391334	3.29438e-16	0.882264	0.310998	4.70309e-05	0.391662	3.3356e-16	0.882347	0.00620455	0.0045425	0.00599208	0.000951603	0.0131025
adenoviridae	Heteromys oresterus	Rodentia	Heteromyidae	FALSE	0	0.341658	0.471745	0.00124941	0.39334	1.06171e-18	0.84887	0.34207	0.00126818	0.393738	1.07194e-18	0.850103	0.00632978	0.00463329	0.00610302	0.00098518	0.0132997
adenoviridae	Heteromys pictus	Rodentia	Heteromyidae	FALSE	0	0.598006	0.490182	0.772958	0.366561	1.28657e-08	0.916305	0.60038	0.77823	0.367719	1.37127e-08	0.918207	0.0235794	0.0196212	0.0159621	0.00846648	0.0430312
adenoviridae	Heteromys salvini	Rodentia	Heteromyidae	FALSE	0	0.540776	0.497748	0.780542	0.410185	4.5821e-09	0.936335	0.542471	0.782797	0.411276	4.69327e-09	0.937447	0.0208153	0.0170583	0.0143714	0.0073891	0.0387958
adenoviridae	Heteromys spectabilis	Rodentia	Heteromyidae	FALSE	0	0.125613	0.330492	2.63345e-13	0.275766	3.62291e-37	0.672737	0.125786	2.6485e-13	0.276077	3.65768e-37	0.673906	0.00627308	0.00458596	0.00605266	0.000969612	0.013204
adenoviridae	Heteromys teleus	Rodentia	Heteromyidae	FALSE	0	0.180429	0.386256	1.23526e-08	0.325297	7.25237e-33	0.772348	0.180636	1.24815e-08	0.325644	7.31492e-33	0.773156	0.00653582	0.00473535	0.00628773	0.00103993	0.0139172
adenoviridae	Hippocamelus antisensis	Cetartiodactyla	Cervidae	FALSE	0	0.429867	0.495913	0.253111	0.434433	6.93371e-17	0.956301	0.430188	0.253427	0.434707	7.01952e-17	0.956503	0.00759446	0.00413652	0.009739	0.0005586	0.0180329
adenoviridae	Hippocamelus bisulcus	Cetartiodactyla	Cervidae	FALSE	0	0.587008	0.493412	0.804375	0.422152	8.28916e-16	0.997865	0.587462	0.804858	0.422373	8.3887e-16	0.997873	0.00662078	0.00358019	0.00850041	0.000507973	0.0159634
adenoviridae	Hipposideros abae	Chiroptera	Hipposideridae	FALSE	0	0.968562	0.173858	0.982741	0.0432637	0.920819	0.999407	0.979248	0.988163	0.0276018	0.948889	0.999602	0.332356	0.328908	0.0716236	0.244174	0.431416
adenoviridae	Hipposideros alongensis	Chiroptera	Hipposideridae	FALSE	0	0.946155	0.232796	0.961623	0.0491943	0.88538	0.991271	0.946304	0.961687	0.0490766	0.885682	0.991282	0.00340422	0.0024036	0.00350754	0.000480802	0.00751919
adenoviridae	Hipposideros armiger	Chiroptera	Hipposideridae	TRUE	1	1	0	1	0	1	1	0.972895	0.98569	0.0336073	0.925067	0.998606	0.868754	0.886605	0.094442	0.737355	0.969521
adenoviridae	Hipposideros ater	Chiroptera	Hipposideridae	FALSE	0	0.540552	0.49887	0.784943	0.445912	2.11624e-14	0.995877	0.540942	0.786303	0.446082	2.13551e-14	0.995942	0.00872383	0.00589376	0.00911862	0.00121549	0.0196641
adenoviridae	Hipposideros atrox	Chiroptera	Hipposideridae	FALSE	0	0.649119	0.475984	0.904467	0.410514	1.36257e-06	0.995412	0.649471	0.905302	0.410626	1.37089e-06	0.995443	0.00738904	0.0049619	0.00767869	0.00103717	0.0167738
adenoviridae	Hipposideros beatus	Chiroptera	Hipposideridae	FALSE	0	0.91682	0.276787	0.959311	0.129589	0.817571	0.995482	0.921148	0.962101	0.127853	0.828135	0.99587	0.0737488	0.070412	0.0218985	0.0493443	0.103347
adenoviridae	Hipposideros bicolor	Chiroptera	Hipposideridae	FALSE	0	0.69017	0.461124	0.948454	0.418728	2.32471e-08	0.999603	0.696655	0.958414	0.419286	2.71472e-08	0.999669	0.166458	0.160827	0.0432062	0.117612	0.22633
adenoviridae	Hipposideros boeadii	Chiroptera	Hipposideridae	FALSE	0	0.00904198	0.0944405	2.03582e-27	0.0604541	0	2.22141e-09	0.00904698	2.03783e-27	0.0604789	0	2.22978e-09	0.00340135	0.00240209	0.00350478	0.000479718	0.00751318
adenoviridae	Hipposideros breviceps	Chiroptera	Hipposideridae	FALSE	0	0.516474	0.499744	0.732184	0.420705	1.59854e-13	0.989705	0.516686	0.732424	0.420776	1.60245e-13	0.989731	0.00345477	0.00243213	0.00355636	0.000500445	0.00763864
adenoviridae	Hipposideros caffer	Chiroptera	Hipposideridae	TRUE	1	1	0	1	0	1	1	0.985697	0.994269	0.0214485	0.96119	0.99995	0.670178	0.682129	0.117183	0.513687	0.809624
adenoviridae	Hipposideros calcaratus	Chiroptera	Hipposideridae	FALSE	0	0.0129834	0.114556	0	0.111582	0	1.8001e-10	0.0129854	0	0.111599	0	1.8028e-10	0.00396674	0.00283335	0.00406268	0.000571331	0.00886715
adenoviridae	Hipposideros camerunensis	Chiroptera	Hipposideridae	FALSE	0	0.915462	0.277538	0.976012	0.1814	0.827463	0.998311	0.91558	0.976057	0.181382	0.827796	0.998315	0.00360924	0.00255669	0.00370699	0.000528374	0.0079821
adenoviridae	Hipposideros cervinus	Chiroptera	Hipposideridae	FALSE	0	0.633938	0.483099	0.898414	0.434673	4.09607e-06	0.994729	0.64172	0.914515	0.436386	4.99915e-06	0.995787	0.174327	0.168428	0.0449531	0.123269	0.23686
adenoviridae	Hipposideros cineraceus	Chiroptera	Hipposideridae	FALSE	0	0.847159	0.357071	0.921833	0.188777	0.611678	0.998044	0.904574	0.950734	0.148551	0.7825	0.998879	0.483725	0.48297	0.0874723	0.375725	0.594522
adenoviridae	Hipposideros coronatus	Chiroptera	Hipposideridae	FALSE	0	0.0376398	0.184537	3.28695e-32	0.160834	0	4.71233e-09	0.037653	3.30837e-32	0.160884	0	4.73953e-09	0.0033987	0.0024007	0.00350222	0.000478716	0.00750762
adenoviridae	Hipposideros corynophyllus	Chiroptera	Hipposideridae	FALSE	0	0.0128953	0.115403	0	0.110913	0	3.34839e-11	0.0128974	0	0.110931	0	3.36411e-11	0.00340012	0.00240145	0.00350359	0.000479252	0.0075106
adenoviridae	Hipposideros coxi	Chiroptera	Hipposideridae	FALSE	0	0.599158	0.491237	0.853265	0.428714	8.55788e-07	0.989851	0.599331	0.854065	0.428786	8.60421e-07	0.989859	0.0034078	0.00240547	0.00351099	0.000482153	0.00752669
[truncated: 174,009 more rows]
